# Supplementary material for: Global Patterns and Predictions of Seafloor Biomass Using Random Forests
Source: PLoS One. 2010 Dec 30;5(12):e15323. doi: 10.1371/journal.pone.0015323 (PMC3012679; doi:10.1371/journal.pone.0015323)
Supplement: File S1 — Google Earth file for the “CoML fresh biomass database”. (KML) [file pone.0015323.s001.kml]

<?xml version="1.0" encoding="UTF-8"?>
<kml xmlns="http://www.opengis.net/kml/2.2" xmlns:gx="http://www.google.com/kml/ext/2.2" xmlns:kml="http://www.opengis.net/kml/2.2" xmlns:atom="http://www.w3.org/2005/Atom">
<Folder>
	<name>Temporary Places</name>
	<open>1</open>
	<Folder>
		<name>Biomass</name>
		<open>1</open>
		<Document>
			<name>bacteria</name>
			<StyleMap id="m_ylw-pushpin">
				<Pair>
					<key>normal</key>
					<styleUrl>#s_ylw-pushpin</styleUrl>
				</Pair>
				<Pair>
					<key>highlight</key>
					<styleUrl>#s_ylw-pushpin_hl</styleUrl>
				</Pair>
			</StyleMap>
			<Style id="s_ylw-pushpin_hl">
				<IconStyle>
					<color>ff0000aa</color>
					<scale>1.3</scale>
					<Icon>
						<href>http://maps.google.com/mapfiles/kml/pushpin/ylw-pushpin.png</href>
					</Icon>
					<hotSpot x="20" y="2" xunits="pixels" yunits="pixels"/>
				</IconStyle>
			</Style>
			<Style id="s_ylw-pushpin">
				<IconStyle>
					<color>ff0000aa</color>
					<scale>1.1</scale>
					<Icon>
						<href>http://maps.google.com/mapfiles/kml/pushpin/ylw-pushpin.png</href>
					</Icon>
					<hotSpot x="20" y="2" xunits="pixels" yunits="pixels"/>
				</IconStyle>
			</Style>
			<Folder>
				<name>data</name>
				<Placemark>
					<styleUrl>#m_ylw-pushpin</styleUrl>
					<ExtendedData>
						<SchemaData schemaUrl="#data">
							<SimpleData name="CATEGORY">bacteria</SimpleData>
							<SimpleData name="STATION">AC1</SimpleData>
							<SimpleData name="REPLICATION">1-AC1-1</SimpleData>
							<SimpleData name="DEPTH.m">2505</SimpleData>
							<SimpleData name="DATE.UTC">5/19/2000</SimpleData>
							<SimpleData name="GEAR">Box Core</SimpleData>
							<SimpleData name="GEAR2">Core</SimpleData>
							<SimpleData name="SEDIMENT.DEPTH.cm">15</SimpleData>
							<SimpleData name="AREA.m2"></SimpleData>
							<SimpleData name="ABUNDANCE.per.m2">90800000000000</SimpleData>
							<SimpleData name="DATA.TYPE.ABUNDANCE">Raw</SimpleData>
							<SimpleData name="CARBON.WT.mg.C.per.m2">1260</SimpleData>
							<SimpleData name="FINAL.UNIT.TYPE">organic C</SimpleData>
							<SimpleData name="CONVERSION.FACTOR.from.Rowe.1983">*1</SimpleData>
							<SimpleData name="FINAL.BIOMASS..mg.C.per.m2">1260</SimpleData>
							<SimpleData name="REFERENCE">Deming &amp; Carpenter 2008</SimpleData>
							<SimpleData name="PROVIDER">Jody W. Deming</SimpleData>
							<SimpleData name="BODY.OF.WATER">Gulf of Mexico</SimpleData>
							<SimpleData name="REGION">Gulf of Mexico</SimpleData>
							<SimpleData name="OCEAN.SEA">Gulf of Mexico</SimpleData>
							<SimpleData name="HABITAT">Continental Slope</SimpleData>
							<SimpleData name="COMMENTS"></SimpleData>
						</SchemaData>
					</ExtendedData>
					<Point>
						<coordinates>-94.55962,26.39166,0</coordinates>
					</Point>
				</Placemark>
				<Placemark>
					<LookAt>
						<longitude>-94.96262387855251</longitude>
						<latitude>28.98307954798804</latitude>
						<altitude>0</altitude>
						<range>4330596.154382762</range>
						<tilt>0</tilt>
						<heading>-3.992054930946053</heading>
						<altitudeMode>relativeToGround</altitudeMode>
						<gx:altitudeMode>relativeToSeaFloor</gx:altitudeMode>
					</LookAt>
					<styleUrl>#m_ylw-pushpin</styleUrl>
					<ExtendedData>
						<SchemaData schemaUrl="bact.biom.kml#data">
							<SimpleData name="CATEGORY">bacteria</SimpleData>
							<SimpleData name="STATION">B1</SimpleData>
							<SimpleData name="REPLICATION">1-B1-1</SimpleData>
							<SimpleData name="DEPTH.m">2260</SimpleData>
							<SimpleData name="DATE.UTC">5/6/2000</SimpleData>
							<SimpleData name="GEAR">Box Core</SimpleData>
							<SimpleData name="GEAR2">Core</SimpleData>
							<SimpleData name="SEDIMENT.DEPTH.cm">15</SimpleData>
							<SimpleData name="AREA.m2"></SimpleData>
							<SimpleData name="ABUNDANCE.per.m2">81000000000000</SimpleData>
							<SimpleData name="DATA.TYPE.ABUNDANCE">Raw</SimpleData>
							<SimpleData name="CARBON.WT.mg.C.per.m2">1180</SimpleData>
							<SimpleData name="FINAL.UNIT.TYPE">organic C</SimpleData>
							<SimpleData name="CONVERSION.FACTOR.from.Rowe.1983">*1</SimpleData>
							<SimpleData name="FINAL.BIOMASS..mg.C.per.m2">1180</SimpleData>
							<SimpleData name="REFERENCE">Deming &amp; Carpenter 2008</SimpleData>
							<SimpleData name="PROVIDER">Jody W. Deming</SimpleData>
							<SimpleData name="BODY.OF.WATER">Gulf of Mexico</SimpleData>
							<SimpleData name="REGION">Gulf of Mexico</SimpleData>
							<SimpleData name="OCEAN.SEA">Gulf of Mexico</SimpleData>
							<SimpleData name="HABITAT">Continental Slope</SimpleData>
							<SimpleData name="COMMENTS"></SimpleData>
						</SchemaData>
					</ExtendedData>
					<Point>
						<coordinates>-91.39973000000001,27.20342000000001,0</coordinates>
					</Point>
				</Placemark>
				<Placemark>
					<styleUrl>#m_ylw-pushpin</styleUrl>
					<ExtendedData>
						<SchemaData schemaUrl="#data">
							<SimpleData name="CATEGORY">bacteria</SimpleData>
							<SimpleData name="STATION">B2</SimpleData>
							<SimpleData name="REPLICATION">1-B2-1</SimpleData>
							<SimpleData name="DEPTH.m">2630</SimpleData>
							<SimpleData name="DATE.UTC">5/12/2000</SimpleData>
							<SimpleData name="GEAR">Box Core</SimpleData>
							<SimpleData name="GEAR2">Core</SimpleData>
							<SimpleData name="SEDIMENT.DEPTH.cm">15</SimpleData>
							<SimpleData name="AREA.m2"></SimpleData>
							<SimpleData name="ABUNDANCE.per.m2">108000000000000</SimpleData>
							<SimpleData name="DATA.TYPE.ABUNDANCE">Raw</SimpleData>
							<SimpleData name="CARBON.WT.mg.C.per.m2">1460</SimpleData>
							<SimpleData name="FINAL.UNIT.TYPE">organic C</SimpleData>
							<SimpleData name="CONVERSION.FACTOR.from.Rowe.1983">*1</SimpleData>
							<SimpleData name="FINAL.BIOMASS..mg.C.per.m2">1460</SimpleData>
							<SimpleData name="REFERENCE">Deming &amp; Carpenter 2008</SimpleData>
							<SimpleData name="PROVIDER">Jody W. Deming</SimpleData>
							<SimpleData name="BODY.OF.WATER">Gulf of Mexico</SimpleData>
							<SimpleData name="REGION">Gulf of Mexico</SimpleData>
							<SimpleData name="OCEAN.SEA">Gulf of Mexico</SimpleData>
							<SimpleData name="HABITAT">Continental Slope</SimpleData>
							<SimpleData name="COMMENTS"></SimpleData>
						</SchemaData>
					</ExtendedData>
					<Point>
						<coordinates>-92.21664999999999,26.55129000000001,0</coordinates>
					</Point>
				</Placemark>
				<Placemark>
					<styleUrl>#m_ylw-pushpin</styleUrl>
					<ExtendedData>
						<SchemaData schemaUrl="#data">
							<SimpleData name="CATEGORY">bacteria</SimpleData>
							<SimpleData name="STATION">B3</SimpleData>
							<SimpleData name="REPLICATION">1-B3-1</SimpleData>
							<SimpleData name="DEPTH.m">2650</SimpleData>
							<SimpleData name="DATE.UTC">5/10/2000</SimpleData>
							<SimpleData name="GEAR">Box Core</SimpleData>
							<SimpleData name="GEAR2">Core</SimpleData>
							<SimpleData name="SEDIMENT.DEPTH.cm">15</SimpleData>
							<SimpleData name="AREA.m2"></SimpleData>
							<SimpleData name="ABUNDANCE.per.m2">73900000000000</SimpleData>
							<SimpleData name="DATA.TYPE.ABUNDANCE">Raw</SimpleData>
							<SimpleData name="CARBON.WT.mg.C.per.m2">1000</SimpleData>
							<SimpleData name="FINAL.UNIT.TYPE">organic C</SimpleData>
							<SimpleData name="CONVERSION.FACTOR.from.Rowe.1983">*1</SimpleData>
							<SimpleData name="FINAL.BIOMASS..mg.C.per.m2">1000</SimpleData>
							<SimpleData name="REFERENCE">Deming &amp; Carpenter 2008</SimpleData>
							<SimpleData name="PROVIDER">Jody W. Deming</SimpleData>
							<SimpleData name="BODY.OF.WATER">Gulf of Mexico</SimpleData>
							<SimpleData name="REGION">Gulf of Mexico</SimpleData>
							<SimpleData name="OCEAN.SEA">Gulf of Mexico</SimpleData>
							<SimpleData name="HABITAT">Continental Slope</SimpleData>
							<SimpleData name="COMMENTS"></SimpleData>
						</SchemaData>
					</ExtendedData>
					<Point>
						<coordinates>-91.7351,26.16445,0</coordinates>
					</Point>
				</Placemark>
				<Placemark>
					<styleUrl>#m_ylw-pushpin</styleUrl>
					<ExtendedData>
						<SchemaData schemaUrl="#data">
							<SimpleData name="CATEGORY">bacteria</SimpleData>
							<SimpleData name="STATION">C12</SimpleData>
							<SimpleData name="REPLICATION">1-C12-1A</SimpleData>
							<SimpleData name="DEPTH.m">336</SimpleData>
							<SimpleData name="DATE.UTC">5/30/2000</SimpleData>
							<SimpleData name="GEAR">Box Core</SimpleData>
							<SimpleData name="GEAR2">Core</SimpleData>
							<SimpleData name="SEDIMENT.DEPTH.cm">15</SimpleData>
							<SimpleData name="AREA.m2"></SimpleData>
							<SimpleData name="ABUNDANCE.per.m2">70600000000000</SimpleData>
							<SimpleData name="DATA.TYPE.ABUNDANCE">Raw</SimpleData>
							<SimpleData name="CARBON.WT.mg.C.per.m2">2720</SimpleData>
							<SimpleData name="FINAL.UNIT.TYPE">organic C</SimpleData>
							<SimpleData name="CONVERSION.FACTOR.from.Rowe.1983">*1</SimpleData>
							<SimpleData name="FINAL.BIOMASS..mg.C.per.m2">2720</SimpleData>
							<SimpleData name="REFERENCE">Deming &amp; Carpenter 2008</SimpleData>
							<SimpleData name="PROVIDER">Jody W. Deming</SimpleData>
							<SimpleData name="BODY.OF.WATER">Gulf of Mexico</SimpleData>
							<SimpleData name="REGION">Gulf of Mexico</SimpleData>
							<SimpleData name="OCEAN.SEA">Gulf of Mexico</SimpleData>
							<SimpleData name="HABITAT">Continental Slope</SimpleData>
							<SimpleData name="COMMENTS"></SimpleData>
						</SchemaData>
					</ExtendedData>
					<Point>
						<coordinates>-90.24916,28.05938,0</coordinates>
					</Point>
				</Placemark>
				<Placemark>
					<styleUrl>#m_ylw-pushpin</styleUrl>
					<ExtendedData>
						<SchemaData schemaUrl="#data">
							<SimpleData name="CATEGORY">bacteria</SimpleData>
							<SimpleData name="STATION">C1</SimpleData>
							<SimpleData name="REPLICATION">1-C1-3</SimpleData>
							<SimpleData name="DEPTH.m">2922</SimpleData>
							<SimpleData name="DATE.UTC">6/2/2000</SimpleData>
							<SimpleData name="GEAR">Box Core</SimpleData>
							<SimpleData name="GEAR2">Core</SimpleData>
							<SimpleData name="SEDIMENT.DEPTH.cm">15</SimpleData>
							<SimpleData name="AREA.m2"></SimpleData>
							<SimpleData name="ABUNDANCE.per.m2">139000000000000</SimpleData>
							<SimpleData name="DATA.TYPE.ABUNDANCE">Raw</SimpleData>
							<SimpleData name="CARBON.WT.mg.C.per.m2">900</SimpleData>
							<SimpleData name="FINAL.UNIT.TYPE">organic C</SimpleData>
							<SimpleData name="CONVERSION.FACTOR.from.Rowe.1983">*1</SimpleData>
							<SimpleData name="FINAL.BIOMASS..mg.C.per.m2">900</SimpleData>
							<SimpleData name="REFERENCE">Deming &amp; Carpenter 2008</SimpleData>
							<SimpleData name="PROVIDER">Jody W. Deming</SimpleData>
							<SimpleData name="BODY.OF.WATER">Gulf of Mexico</SimpleData>
							<SimpleData name="REGION">Gulf of Mexico</SimpleData>
							<SimpleData name="OCEAN.SEA">Gulf of Mexico</SimpleData>
							<SimpleData name="HABITAT">Continental Slope</SimpleData>
							<SimpleData name="COMMENTS"></SimpleData>
						</SchemaData>
					</ExtendedData>
					<Point>
						<coordinates>-89.24142000000001,26.37942,0</coordinates>
					</Point>
				</Placemark>
				<Placemark>
					<styleUrl>#m_ylw-pushpin</styleUrl>
					<ExtendedData>
						<SchemaData schemaUrl="#data">
							<SimpleData name="CATEGORY">bacteria</SimpleData>
							<SimpleData name="STATION">C14</SimpleData>
							<SimpleData name="REPLICATION">1-C14-2</SimpleData>
							<SimpleData name="DEPTH.m">2487</SimpleData>
							<SimpleData name="DATE.UTC">6/1/2000</SimpleData>
							<SimpleData name="GEAR">Box Core</SimpleData>
							<SimpleData name="GEAR2">Core</SimpleData>
							<SimpleData name="SEDIMENT.DEPTH.cm">15</SimpleData>
							<SimpleData name="AREA.m2"></SimpleData>
							<SimpleData name="ABUNDANCE.per.m2">95900000000000</SimpleData>
							<SimpleData name="DATA.TYPE.ABUNDANCE">Raw</SimpleData>
							<SimpleData name="CARBON.WT.mg.C.per.m2">1340</SimpleData>
							<SimpleData name="FINAL.UNIT.TYPE">organic C</SimpleData>
							<SimpleData name="CONVERSION.FACTOR.from.Rowe.1983">*1</SimpleData>
							<SimpleData name="FINAL.BIOMASS..mg.C.per.m2">1340</SimpleData>
							<SimpleData name="REFERENCE">Deming &amp; Carpenter 2008</SimpleData>
							<SimpleData name="PROVIDER">Jody W. Deming</SimpleData>
							<SimpleData name="BODY.OF.WATER">Gulf of Mexico</SimpleData>
							<SimpleData name="REGION">Gulf of Mexico</SimpleData>
							<SimpleData name="OCEAN.SEA">Gulf of Mexico</SimpleData>
							<SimpleData name="HABITAT">Continental Slope</SimpleData>
							<SimpleData name="COMMENTS"></SimpleData>
						</SchemaData>
					</ExtendedData>
					<Point>
						<coordinates>-89.57041,26.92995,0</coordinates>
					</Point>
				</Placemark>
				<Placemark>
					<styleUrl>#m_ylw-pushpin</styleUrl>
					<ExtendedData>
						<SchemaData schemaUrl="#data">
							<SimpleData name="CATEGORY">bacteria</SimpleData>
							<SimpleData name="STATION">C4</SimpleData>
							<SimpleData name="REPLICATION">1-C4-1</SimpleData>
							<SimpleData name="DEPTH.m">1455</SimpleData>
							<SimpleData name="DATE.UTC">5/31/2000</SimpleData>
							<SimpleData name="GEAR">Box Core</SimpleData>
							<SimpleData name="GEAR2">Core</SimpleData>
							<SimpleData name="SEDIMENT.DEPTH.cm">15</SimpleData>
							<SimpleData name="AREA.m2"></SimpleData>
							<SimpleData name="ABUNDANCE.per.m2">74600000000000</SimpleData>
							<SimpleData name="DATA.TYPE.ABUNDANCE">Raw</SimpleData>
							<SimpleData name="CARBON.WT.mg.C.per.m2">1240</SimpleData>
							<SimpleData name="FINAL.UNIT.TYPE">organic C</SimpleData>
							<SimpleData name="CONVERSION.FACTOR.from.Rowe.1983">*1</SimpleData>
							<SimpleData name="FINAL.BIOMASS..mg.C.per.m2">1240</SimpleData>
							<SimpleData name="REFERENCE">Deming &amp; Carpenter 2008</SimpleData>
							<SimpleData name="PROVIDER">Jody W. Deming</SimpleData>
							<SimpleData name="BODY.OF.WATER">Gulf of Mexico</SimpleData>
							<SimpleData name="REGION">Gulf of Mexico</SimpleData>
							<SimpleData name="OCEAN.SEA">Gulf of Mexico</SimpleData>
							<SimpleData name="HABITAT">Continental Slope</SimpleData>
							<SimpleData name="COMMENTS"></SimpleData>
						</SchemaData>
					</ExtendedData>
					<Point>
						<coordinates>-89.78565,27.4594,0</coordinates>
					</Point>
				</Placemark>
				<Placemark>
					<styleUrl>#m_ylw-pushpin</styleUrl>
					<ExtendedData>
						<SchemaData schemaUrl="#data">
							<SimpleData name="CATEGORY">bacteria</SimpleData>
							<SimpleData name="STATION">C7</SimpleData>
							<SimpleData name="REPLICATION">1-C7-1</SimpleData>
							<SimpleData name="DEPTH.m">1080</SimpleData>
							<SimpleData name="DATE.UTC">5/30/2000</SimpleData>
							<SimpleData name="GEAR">Box Core</SimpleData>
							<SimpleData name="GEAR2">Core</SimpleData>
							<SimpleData name="SEDIMENT.DEPTH.cm">15</SimpleData>
							<SimpleData name="AREA.m2"></SimpleData>
							<SimpleData name="ABUNDANCE.per.m2">75300000000000</SimpleData>
							<SimpleData name="DATA.TYPE.ABUNDANCE">Raw</SimpleData>
							<SimpleData name="CARBON.WT.mg.C.per.m2">1330</SimpleData>
							<SimpleData name="FINAL.UNIT.TYPE">organic C</SimpleData>
							<SimpleData name="CONVERSION.FACTOR.from.Rowe.1983">*1</SimpleData>
							<SimpleData name="FINAL.BIOMASS..mg.C.per.m2">1330</SimpleData>
							<SimpleData name="REFERENCE">Deming &amp; Carpenter 2008</SimpleData>
							<SimpleData name="PROVIDER">Jody W. Deming</SimpleData>
							<SimpleData name="BODY.OF.WATER">Gulf of Mexico</SimpleData>
							<SimpleData name="REGION">Gulf of Mexico</SimpleData>
							<SimpleData name="OCEAN.SEA">Gulf of Mexico</SimpleData>
							<SimpleData name="HABITAT">Continental Slope</SimpleData>
							<SimpleData name="COMMENTS"></SimpleData>
						</SchemaData>
					</ExtendedData>
					<Point>
						<coordinates>-89.97964,27.72828,0</coordinates>
					</Point>
				</Placemark>
				<Placemark>
					<styleUrl>#m_ylw-pushpin</styleUrl>
					<ExtendedData>
						<SchemaData schemaUrl="#data">
							<SimpleData name="CATEGORY">bacteria</SimpleData>
							<SimpleData name="STATION">MT1</SimpleData>
							<SimpleData name="REPLICATION">1-MT1-3</SimpleData>
							<SimpleData name="DEPTH.m">482</SimpleData>
							<SimpleData name="DATE.UTC">6/17/2000</SimpleData>
							<SimpleData name="GEAR">Box Core</SimpleData>
							<SimpleData name="GEAR2">Core</SimpleData>
							<SimpleData name="SEDIMENT.DEPTH.cm">15</SimpleData>
							<SimpleData name="AREA.m2"></SimpleData>
							<SimpleData name="ABUNDANCE.per.m2">103000000000000</SimpleData>
							<SimpleData name="DATA.TYPE.ABUNDANCE">Raw</SimpleData>
							<SimpleData name="CARBON.WT.mg.C.per.m2">1980</SimpleData>
							<SimpleData name="FINAL.UNIT.TYPE">organic C</SimpleData>
							<SimpleData name="CONVERSION.FACTOR.from.Rowe.1983">*1</SimpleData>
							<SimpleData name="FINAL.BIOMASS..mg.C.per.m2">1980</SimpleData>
							<SimpleData name="REFERENCE">Deming &amp; Carpenter 2008</SimpleData>
							<SimpleData name="PROVIDER">Jody W. Deming</SimpleData>
							<SimpleData name="BODY.OF.WATER">Gulf of Mexico</SimpleData>
							<SimpleData name="REGION">Gulf of Mexico</SimpleData>
							<SimpleData name="OCEAN.SEA">Gulf of Mexico</SimpleData>
							<SimpleData name="HABITAT">Continental Slope</SimpleData>
							<SimpleData name="COMMENTS"></SimpleData>
						</SchemaData>
					</ExtendedData>
					<Point>
						<coordinates>-89.82714,28.54114,0</coordinates>
					</Point>
				</Placemark>
				<Placemark>
					<styleUrl>#m_ylw-pushpin</styleUrl>
					<ExtendedData>
						<SchemaData schemaUrl="#data">
							<SimpleData name="CATEGORY">bacteria</SimpleData>
							<SimpleData name="STATION">MT2</SimpleData>
							<SimpleData name="REPLICATION">1-MT2-1</SimpleData>
							<SimpleData name="DEPTH.m">660</SimpleData>
							<SimpleData name="DATE.UTC">6/16/2000</SimpleData>
							<SimpleData name="GEAR">Box Core</SimpleData>
							<SimpleData name="GEAR2">Core</SimpleData>
							<SimpleData name="SEDIMENT.DEPTH.cm">15</SimpleData>
							<SimpleData name="AREA.m2"></SimpleData>
							<SimpleData name="ABUNDANCE.per.m2">137000000000000</SimpleData>
							<SimpleData name="DATA.TYPE.ABUNDANCE">Raw</SimpleData>
							<SimpleData name="CARBON.WT.mg.C.per.m2">2560</SimpleData>
							<SimpleData name="FINAL.UNIT.TYPE">organic C</SimpleData>
							<SimpleData name="CONVERSION.FACTOR.from.Rowe.1983">*1</SimpleData>
							<SimpleData name="FINAL.BIOMASS..mg.C.per.m2">2560</SimpleData>
							<SimpleData name="REFERENCE">Deming &amp; Carpenter 2008</SimpleData>
							<SimpleData name="PROVIDER">Jody W. Deming</SimpleData>
							<SimpleData name="BODY.OF.WATER">Gulf of Mexico</SimpleData>
							<SimpleData name="REGION">Gulf of Mexico</SimpleData>
							<SimpleData name="OCEAN.SEA">Gulf of Mexico</SimpleData>
							<SimpleData name="HABITAT">Continental Slope</SimpleData>
							<SimpleData name="COMMENTS"></SimpleData>
						</SchemaData>
					</ExtendedData>
					<Point>
						<coordinates>-89.67261000000001,28.45108,0</coordinates>
					</Point>
				</Placemark>
				<Placemark>
					<styleUrl>#m_ylw-pushpin</styleUrl>
					<ExtendedData>
						<SchemaData schemaUrl="#data">
							<SimpleData name="CATEGORY">bacteria</SimpleData>
							<SimpleData name="STATION">MT3</SimpleData>
							<SimpleData name="REPLICATION">1-MT3-1</SimpleData>
							<SimpleData name="DEPTH.m">983</SimpleData>
							<SimpleData name="DATE.UTC">6/16/2000</SimpleData>
							<SimpleData name="GEAR">Box Core</SimpleData>
							<SimpleData name="GEAR2">Core</SimpleData>
							<SimpleData name="SEDIMENT.DEPTH.cm">15</SimpleData>
							<SimpleData name="AREA.m2"></SimpleData>
							<SimpleData name="ABUNDANCE.per.m2">125000000000000</SimpleData>
							<SimpleData name="DATA.TYPE.ABUNDANCE">Raw</SimpleData>
							<SimpleData name="CARBON.WT.mg.C.per.m2">2560</SimpleData>
							<SimpleData name="FINAL.UNIT.TYPE">organic C</SimpleData>
							<SimpleData name="CONVERSION.FACTOR.from.Rowe.1983">*1</SimpleData>
							<SimpleData name="FINAL.BIOMASS..mg.C.per.m2">2560</SimpleData>
							<SimpleData name="REFERENCE">Deming &amp; Carpenter 2008</SimpleData>
							<SimpleData name="PROVIDER">Jody W. Deming</SimpleData>
							<SimpleData name="BODY.OF.WATER">Gulf of Mexico</SimpleData>
							<SimpleData name="REGION">Gulf of Mexico</SimpleData>
							<SimpleData name="OCEAN.SEA">Gulf of Mexico</SimpleData>
							<SimpleData name="HABITAT">Continental Slope</SimpleData>
							<SimpleData name="COMMENTS"></SimpleData>
						</SchemaData>
					</ExtendedData>
					<Point>
						<coordinates>-89.49612999999999,28.22041000000002,0</coordinates>
					</Point>
				</Placemark>
				<Placemark>
					<styleUrl>#m_ylw-pushpin</styleUrl>
					<ExtendedData>
						<SchemaData schemaUrl="#data">
							<SimpleData name="CATEGORY">bacteria</SimpleData>
							<SimpleData name="STATION">MT4</SimpleData>
							<SimpleData name="REPLICATION">1-MT4-1</SimpleData>
							<SimpleData name="DEPTH.m">1401</SimpleData>
							<SimpleData name="DATE.UTC">6/15/2000</SimpleData>
							<SimpleData name="GEAR">Box Core</SimpleData>
							<SimpleData name="GEAR2">Core</SimpleData>
							<SimpleData name="SEDIMENT.DEPTH.cm">15</SimpleData>
							<SimpleData name="AREA.m2"></SimpleData>
							<SimpleData name="ABUNDANCE.per.m2">56300000000000</SimpleData>
							<SimpleData name="DATA.TYPE.ABUNDANCE">Raw</SimpleData>
							<SimpleData name="CARBON.WT.mg.C.per.m2">940</SimpleData>
							<SimpleData name="FINAL.UNIT.TYPE">organic C</SimpleData>
							<SimpleData name="CONVERSION.FACTOR.from.Rowe.1983">*1</SimpleData>
							<SimpleData name="FINAL.BIOMASS..mg.C.per.m2">940</SimpleData>
							<SimpleData name="REFERENCE">Deming &amp; Carpenter 2008</SimpleData>
							<SimpleData name="PROVIDER">Jody W. Deming</SimpleData>
							<SimpleData name="BODY.OF.WATER">Gulf of Mexico</SimpleData>
							<SimpleData name="REGION">Gulf of Mexico</SimpleData>
							<SimpleData name="OCEAN.SEA">Gulf of Mexico</SimpleData>
							<SimpleData name="HABITAT">Continental Slope</SimpleData>
							<SimpleData name="COMMENTS"></SimpleData>
						</SchemaData>
					</ExtendedData>
					<Point>
						<coordinates>-89.16588,27.827,0</coordinates>
					</Point>
				</Placemark>
				<Placemark>
					<styleUrl>#m_ylw-pushpin</styleUrl>
					<ExtendedData>
						<SchemaData schemaUrl="#data">
							<SimpleData name="CATEGORY">bacteria</SimpleData>
							<SimpleData name="STATION">MT5</SimpleData>
							<SimpleData name="REPLICATION">1-MT5-1</SimpleData>
							<SimpleData name="DEPTH.m">2275</SimpleData>
							<SimpleData name="DATE.UTC">6/3/2000</SimpleData>
							<SimpleData name="GEAR">Box Core</SimpleData>
							<SimpleData name="GEAR2">Core</SimpleData>
							<SimpleData name="SEDIMENT.DEPTH.cm">15</SimpleData>
							<SimpleData name="AREA.m2"></SimpleData>
							<SimpleData name="ABUNDANCE.per.m2">67600000000000</SimpleData>
							<SimpleData name="DATA.TYPE.ABUNDANCE">Raw</SimpleData>
							<SimpleData name="CARBON.WT.mg.C.per.m2">980</SimpleData>
							<SimpleData name="FINAL.UNIT.TYPE">organic C</SimpleData>
							<SimpleData name="CONVERSION.FACTOR.from.Rowe.1983">*1</SimpleData>
							<SimpleData name="FINAL.BIOMASS..mg.C.per.m2">980</SimpleData>
							<SimpleData name="REFERENCE">Deming &amp; Carpenter 2008</SimpleData>
							<SimpleData name="PROVIDER">Jody W. Deming</SimpleData>
							<SimpleData name="BODY.OF.WATER">Gulf of Mexico</SimpleData>
							<SimpleData name="REGION">Gulf of Mexico</SimpleData>
							<SimpleData name="OCEAN.SEA">Gulf of Mexico</SimpleData>
							<SimpleData name="HABITAT">Continental Slope</SimpleData>
							<SimpleData name="COMMENTS"></SimpleData>
						</SchemaData>
					</ExtendedData>
					<Point>
						<coordinates>-88.66782000000001,27.33218,0</coordinates>
					</Point>
				</Placemark>
				<Placemark>
					<styleUrl>#m_ylw-pushpin</styleUrl>
					<ExtendedData>
						<SchemaData schemaUrl="#data">
							<SimpleData name="CATEGORY">bacteria</SimpleData>
							<SimpleData name="STATION">MT6</SimpleData>
							<SimpleData name="REPLICATION">1-MT6-1</SimpleData>
							<SimpleData name="DEPTH.m">2745</SimpleData>
							<SimpleData name="DATE.UTC">6/4/2000</SimpleData>
							<SimpleData name="GEAR">Box Core</SimpleData>
							<SimpleData name="GEAR2">Core</SimpleData>
							<SimpleData name="SEDIMENT.DEPTH.cm">15</SimpleData>
							<SimpleData name="AREA.m2"></SimpleData>
							<SimpleData name="ABUNDANCE.per.m2">67600000000000</SimpleData>
							<SimpleData name="DATA.TYPE.ABUNDANCE">Raw</SimpleData>
							<SimpleData name="CARBON.WT.mg.C.per.m2">1020</SimpleData>
							<SimpleData name="FINAL.UNIT.TYPE">organic C</SimpleData>
							<SimpleData name="CONVERSION.FACTOR.from.Rowe.1983">*1</SimpleData>
							<SimpleData name="FINAL.BIOMASS..mg.C.per.m2">1020</SimpleData>
							<SimpleData name="REFERENCE">Deming &amp; Carpenter 2008</SimpleData>
							<SimpleData name="PROVIDER">Jody W. Deming</SimpleData>
							<SimpleData name="BODY.OF.WATER">Gulf of Mexico</SimpleData>
							<SimpleData name="REGION">Gulf of Mexico</SimpleData>
							<SimpleData name="OCEAN.SEA">Gulf of Mexico</SimpleData>
							<SimpleData name="HABITAT">Continental Slope</SimpleData>
							<SimpleData name="COMMENTS"></SimpleData>
						</SchemaData>
					</ExtendedData>
					<Point>
						<coordinates>-87.99782999999999,27.00011,0</coordinates>
					</Point>
				</Placemark>
				<Placemark>
					<styleUrl>#m_ylw-pushpin</styleUrl>
					<ExtendedData>
						<SchemaData schemaUrl="#data">
							<SimpleData name="CATEGORY">bacteria</SimpleData>
							<SimpleData name="STATION">NB2</SimpleData>
							<SimpleData name="REPLICATION">1-NB2-1</SimpleData>
							<SimpleData name="DEPTH.m">1530</SimpleData>
							<SimpleData name="DATE.UTC">5/7/2000</SimpleData>
							<SimpleData name="GEAR">Box Core</SimpleData>
							<SimpleData name="GEAR2">Core</SimpleData>
							<SimpleData name="SEDIMENT.DEPTH.cm">15</SimpleData>
							<SimpleData name="AREA.m2"></SimpleData>
							<SimpleData name="ABUNDANCE.per.m2">99400000000000</SimpleData>
							<SimpleData name="DATA.TYPE.ABUNDANCE">Raw</SimpleData>
							<SimpleData name="CARBON.WT.mg.C.per.m2">1630</SimpleData>
							<SimpleData name="FINAL.UNIT.TYPE">organic C</SimpleData>
							<SimpleData name="CONVERSION.FACTOR.from.Rowe.1983">*1</SimpleData>
							<SimpleData name="FINAL.BIOMASS..mg.C.per.m2">1630</SimpleData>
							<SimpleData name="REFERENCE">Deming &amp; Carpenter 2008</SimpleData>
							<SimpleData name="PROVIDER">Jody W. Deming</SimpleData>
							<SimpleData name="BODY.OF.WATER">Gulf of Mexico</SimpleData>
							<SimpleData name="REGION">Gulf of Mexico</SimpleData>
							<SimpleData name="OCEAN.SEA">Gulf of Mexico</SimpleData>
							<SimpleData name="HABITAT">Continental Slope</SimpleData>
							<SimpleData name="COMMENTS"></SimpleData>
						</SchemaData>
					</ExtendedData>
					<Point>
						<coordinates>-91.99930999999999,27.13374,0</coordinates>
					</Point>
				</Placemark>
				<Placemark>
					<styleUrl>#m_ylw-pushpin</styleUrl>
					<ExtendedData>
						<SchemaData schemaUrl="#data">
							<SimpleData name="CATEGORY">bacteria</SimpleData>
							<SimpleData name="STATION">NB3</SimpleData>
							<SimpleData name="REPLICATION">1-NB3-1</SimpleData>
							<SimpleData name="DEPTH.m">1875</SimpleData>
							<SimpleData name="DATE.UTC">5/8/2000</SimpleData>
							<SimpleData name="GEAR">Box Core</SimpleData>
							<SimpleData name="GEAR2">Core</SimpleData>
							<SimpleData name="SEDIMENT.DEPTH.cm">15</SimpleData>
							<SimpleData name="AREA.m2"></SimpleData>
							<SimpleData name="ABUNDANCE.per.m2">84600000000000</SimpleData>
							<SimpleData name="DATA.TYPE.ABUNDANCE">Raw</SimpleData>
							<SimpleData name="CARBON.WT.mg.C.per.m2">1310</SimpleData>
							<SimpleData name="FINAL.UNIT.TYPE">organic C</SimpleData>
							<SimpleData name="CONVERSION.FACTOR.from.Rowe.1983">*1</SimpleData>
							<SimpleData name="FINAL.BIOMASS..mg.C.per.m2">1310</SimpleData>
							<SimpleData name="REFERENCE">Deming &amp; Carpenter 2008</SimpleData>
							<SimpleData name="PROVIDER">Jody W. Deming</SimpleData>
							<SimpleData name="BODY.OF.WATER">Gulf of Mexico</SimpleData>
							<SimpleData name="REGION">Gulf of Mexico</SimpleData>
							<SimpleData name="OCEAN.SEA">Gulf of Mexico</SimpleData>
							<SimpleData name="HABITAT">Continental Slope</SimpleData>
							<SimpleData name="COMMENTS"></SimpleData>
						</SchemaData>
					</ExtendedData>
					<Point>
						<coordinates>-91.82255000000001,26.55803,0</coordinates>
					</Point>
				</Placemark>
				<Placemark>
					<styleUrl>#m_ylw-pushpin</styleUrl>
					<ExtendedData>
						<SchemaData schemaUrl="#data">
							<SimpleData name="CATEGORY">bacteria</SimpleData>
							<SimpleData name="STATION">NB4</SimpleData>
							<SimpleData name="REPLICATION">1-NB4-1</SimpleData>
							<SimpleData name="DEPTH.m">2030</SimpleData>
							<SimpleData name="DATE.UTC">6/13/2000</SimpleData>
							<SimpleData name="GEAR">Box Core</SimpleData>
							<SimpleData name="GEAR2">Core</SimpleData>
							<SimpleData name="SEDIMENT.DEPTH.cm">15</SimpleData>
							<SimpleData name="AREA.m2"></SimpleData>
							<SimpleData name="ABUNDANCE.per.m2">79200000000000</SimpleData>
							<SimpleData name="DATA.TYPE.ABUNDANCE">Raw</SimpleData>
							<SimpleData name="CARBON.WT.mg.C.per.m2">1200</SimpleData>
							<SimpleData name="FINAL.UNIT.TYPE">organic C</SimpleData>
							<SimpleData name="CONVERSION.FACTOR.from.Rowe.1983">*1</SimpleData>
							<SimpleData name="FINAL.BIOMASS..mg.C.per.m2">1200</SimpleData>
							<SimpleData name="REFERENCE">Deming &amp; Carpenter 2008</SimpleData>
							<SimpleData name="PROVIDER">Jody W. Deming</SimpleData>
							<SimpleData name="BODY.OF.WATER">Gulf of Mexico</SimpleData>
							<SimpleData name="REGION">Gulf of Mexico</SimpleData>
							<SimpleData name="OCEAN.SEA">Gulf of Mexico</SimpleData>
							<SimpleData name="HABITAT">Continental Slope</SimpleData>
							<SimpleData name="COMMENTS"></SimpleData>
						</SchemaData>
					</ExtendedData>
					<Point>
						<coordinates>-92.39496,26.25452,0</coordinates>
					</Point>
				</Placemark>
				<Placemark>
					<styleUrl>#m_ylw-pushpin</styleUrl>
					<ExtendedData>
						<SchemaData schemaUrl="#data">
							<SimpleData name="CATEGORY">bacteria</SimpleData>
							<SimpleData name="STATION">NB5</SimpleData>
							<SimpleData name="REPLICATION">1-NB5-1</SimpleData>
							<SimpleData name="DEPTH.m">2070</SimpleData>
							<SimpleData name="DATE.UTC">5/9/2000</SimpleData>
							<SimpleData name="GEAR">Box Core</SimpleData>
							<SimpleData name="GEAR2">Core</SimpleData>
							<SimpleData name="SEDIMENT.DEPTH.cm">15</SimpleData>
							<SimpleData name="AREA.m2"></SimpleData>
							<SimpleData name="ABUNDANCE.per.m2">113000000000000</SimpleData>
							<SimpleData name="DATA.TYPE.ABUNDANCE">Raw</SimpleData>
							<SimpleData name="CARBON.WT.mg.C.per.m2">1700</SimpleData>
							<SimpleData name="FINAL.UNIT.TYPE">organic C</SimpleData>
							<SimpleData name="CONVERSION.FACTOR.from.Rowe.1983">*1</SimpleData>
							<SimpleData name="FINAL.BIOMASS..mg.C.per.m2">1700</SimpleData>
							<SimpleData name="REFERENCE">Deming &amp; Carpenter 2008</SimpleData>
							<SimpleData name="PROVIDER">Jody W. Deming</SimpleData>
							<SimpleData name="BODY.OF.WATER">Gulf of Mexico</SimpleData>
							<SimpleData name="REGION">Gulf of Mexico</SimpleData>
							<SimpleData name="OCEAN.SEA">Gulf of Mexico</SimpleData>
							<SimpleData name="HABITAT">Continental Slope</SimpleData>
							<SimpleData name="COMMENTS"></SimpleData>
						</SchemaData>
					</ExtendedData>
					<Point>
						<coordinates>-91.21017000000001,26.2519,0</coordinates>
					</Point>
				</Placemark>
				<Placemark>
					<styleUrl>#m_ylw-pushpin</styleUrl>
					<ExtendedData>
						<SchemaData schemaUrl="#data">
							<SimpleData name="CATEGORY">bacteria</SimpleData>
							<SimpleData name="STATION">RW1</SimpleData>
							<SimpleData name="REPLICATION">1-RW1-1</SimpleData>
							<SimpleData name="DEPTH.m">213</SimpleData>
							<SimpleData name="DATE.UTC">5/23/2000</SimpleData>
							<SimpleData name="GEAR">Box Core</SimpleData>
							<SimpleData name="GEAR2">Core</SimpleData>
							<SimpleData name="SEDIMENT.DEPTH.cm">15</SimpleData>
							<SimpleData name="AREA.m2"></SimpleData>
							<SimpleData name="ABUNDANCE.per.m2">115000000000000</SimpleData>
							<SimpleData name="DATA.TYPE.ABUNDANCE">Raw</SimpleData>
							<SimpleData name="CARBON.WT.mg.C.per.m2">2280</SimpleData>
							<SimpleData name="FINAL.UNIT.TYPE">organic C</SimpleData>
							<SimpleData name="CONVERSION.FACTOR.from.Rowe.1983">*1</SimpleData>
							<SimpleData name="FINAL.BIOMASS..mg.C.per.m2">2280</SimpleData>
							<SimpleData name="REFERENCE">Deming &amp; Carpenter 2008</SimpleData>
							<SimpleData name="PROVIDER">Jody W. Deming</SimpleData>
							<SimpleData name="BODY.OF.WATER">Gulf of Mexico</SimpleData>
							<SimpleData name="REGION">Gulf of Mexico</SimpleData>
							<SimpleData name="OCEAN.SEA">Gulf of Mexico</SimpleData>
							<SimpleData name="HABITAT">Continental Slope</SimpleData>
							<SimpleData name="COMMENTS"></SimpleData>
						</SchemaData>
					</ExtendedData>
					<Point>
						<coordinates>-96.00239999999999,27.5004,0</coordinates>
					</Point>
				</Placemark>
				<Placemark>
					<styleUrl>#m_ylw-pushpin</styleUrl>
					<ExtendedData>
						<SchemaData schemaUrl="#data">
							<SimpleData name="CATEGORY">bacteria</SimpleData>
							<SimpleData name="STATION">RW2</SimpleData>
							<SimpleData name="REPLICATION">1-RW2-1</SimpleData>
							<SimpleData name="DEPTH.m">950</SimpleData>
							<SimpleData name="DATE.UTC">5/22/2000</SimpleData>
							<SimpleData name="GEAR">Box Core</SimpleData>
							<SimpleData name="GEAR2">Core</SimpleData>
							<SimpleData name="SEDIMENT.DEPTH.cm">15</SimpleData>
							<SimpleData name="AREA.m2"></SimpleData>
							<SimpleData name="ABUNDANCE.per.m2">87700000000000</SimpleData>
							<SimpleData name="DATA.TYPE.ABUNDANCE">Raw</SimpleData>
							<SimpleData name="CARBON.WT.mg.C.per.m2">1570</SimpleData>
							<SimpleData name="FINAL.UNIT.TYPE">organic C</SimpleData>
							<SimpleData name="CONVERSION.FACTOR.from.Rowe.1983">*1</SimpleData>
							<SimpleData name="FINAL.BIOMASS..mg.C.per.m2">1570</SimpleData>
							<SimpleData name="REFERENCE">Deming &amp; Carpenter 2008</SimpleData>
							<SimpleData name="PROVIDER">Jody W. Deming</SimpleData>
							<SimpleData name="BODY.OF.WATER">Gulf of Mexico</SimpleData>
							<SimpleData name="REGION">Gulf of Mexico</SimpleData>
							<SimpleData name="OCEAN.SEA">Gulf of Mexico</SimpleData>
							<SimpleData name="HABITAT">Continental Slope</SimpleData>
							<SimpleData name="COMMENTS"></SimpleData>
						</SchemaData>
					</ExtendedData>
					<Point>
						<coordinates>-95.74363999999999,27.25406,0</coordinates>
					</Point>
				</Placemark>
				<Placemark>
					<styleUrl>#m_ylw-pushpin</styleUrl>
					<ExtendedData>
						<SchemaData schemaUrl="#data">
							<SimpleData name="CATEGORY">bacteria</SimpleData>
							<SimpleData name="STATION">RW3</SimpleData>
							<SimpleData name="REPLICATION">1-RW3-1</SimpleData>
							<SimpleData name="DEPTH.m">1320</SimpleData>
							<SimpleData name="DATE.UTC">5/21/2000</SimpleData>
							<SimpleData name="GEAR">Box Core</SimpleData>
							<SimpleData name="GEAR2">Core</SimpleData>
							<SimpleData name="SEDIMENT.DEPTH.cm">15</SimpleData>
							<SimpleData name="AREA.m2"></SimpleData>
							<SimpleData name="ABUNDANCE.per.m2">73400000000000</SimpleData>
							<SimpleData name="DATA.TYPE.ABUNDANCE">Raw</SimpleData>
							<SimpleData name="CARBON.WT.mg.C.per.m2">1250</SimpleData>
							<SimpleData name="FINAL.UNIT.TYPE">organic C</SimpleData>
							<SimpleData name="CONVERSION.FACTOR.from.Rowe.1983">*1</SimpleData>
							<SimpleData name="FINAL.BIOMASS..mg.C.per.m2">1250</SimpleData>
							<SimpleData name="REFERENCE">Deming &amp; Carpenter 2008</SimpleData>
							<SimpleData name="PROVIDER">Jody W. Deming</SimpleData>
							<SimpleData name="BODY.OF.WATER">Gulf of Mexico</SimpleData>
							<SimpleData name="REGION">Gulf of Mexico</SimpleData>
							<SimpleData name="OCEAN.SEA">Gulf of Mexico</SimpleData>
							<SimpleData name="HABITAT">Continental Slope</SimpleData>
							<SimpleData name="COMMENTS"></SimpleData>
						</SchemaData>
					</ExtendedData>
					<Point>
						<coordinates>-95.50320000000001,27.00497,0</coordinates>
					</Point>
				</Placemark>
				<Placemark>
					<styleUrl>#m_ylw-pushpin</styleUrl>
					<ExtendedData>
						<SchemaData schemaUrl="#data">
							<SimpleData name="CATEGORY">bacteria</SimpleData>
							<SimpleData name="STATION">RW4</SimpleData>
							<SimpleData name="REPLICATION">1-RW4-1</SimpleData>
							<SimpleData name="DEPTH.m">1570</SimpleData>
							<SimpleData name="DATE.UTC">5/21/2000</SimpleData>
							<SimpleData name="GEAR">Box Core</SimpleData>
							<SimpleData name="GEAR2">Core</SimpleData>
							<SimpleData name="SEDIMENT.DEPTH.cm">15</SimpleData>
							<SimpleData name="AREA.m2"></SimpleData>
							<SimpleData name="ABUNDANCE.per.m2">74900000000000</SimpleData>
							<SimpleData name="DATA.TYPE.ABUNDANCE">Raw</SimpleData>
							<SimpleData name="CARBON.WT.mg.C.per.m2">1220</SimpleData>
							<SimpleData name="FINAL.UNIT.TYPE">organic C</SimpleData>
							<SimpleData name="CONVERSION.FACTOR.from.Rowe.1983">*1</SimpleData>
							<SimpleData name="FINAL.BIOMASS..mg.C.per.m2">1220</SimpleData>
							<SimpleData name="REFERENCE">Deming &amp; Carpenter 2008</SimpleData>
							<SimpleData name="PROVIDER">Jody W. Deming</SimpleData>
							<SimpleData name="BODY.OF.WATER">Gulf of Mexico</SimpleData>
							<SimpleData name="REGION">Gulf of Mexico</SimpleData>
							<SimpleData name="OCEAN.SEA">Gulf of Mexico</SimpleData>
							<SimpleData name="HABITAT">Continental Slope</SimpleData>
							<SimpleData name="COMMENTS"></SimpleData>
						</SchemaData>
					</ExtendedData>
					<Point>
						<coordinates>-95.24612999999999,26.7481,0</coordinates>
					</Point>
				</Placemark>
				<Placemark>
					<styleUrl>#m_ylw-pushpin</styleUrl>
					<ExtendedData>
						<SchemaData schemaUrl="#data">
							<SimpleData name="CATEGORY">bacteria</SimpleData>
							<SimpleData name="STATION">RW5</SimpleData>
							<SimpleData name="REPLICATION">1-RW5-1</SimpleData>
							<SimpleData name="DEPTH.m">1620</SimpleData>
							<SimpleData name="DATE.UTC">5/20/2000</SimpleData>
							<SimpleData name="GEAR">Box Core</SimpleData>
							<SimpleData name="GEAR2">Core</SimpleData>
							<SimpleData name="SEDIMENT.DEPTH.cm">15</SimpleData>
							<SimpleData name="AREA.m2"></SimpleData>
							<SimpleData name="ABUNDANCE.per.m2">85800000000000</SimpleData>
							<SimpleData name="DATA.TYPE.ABUNDANCE">Raw</SimpleData>
							<SimpleData name="CARBON.WT.mg.C.per.m2">1390</SimpleData>
							<SimpleData name="FINAL.UNIT.TYPE">organic C</SimpleData>
							<SimpleData name="CONVERSION.FACTOR.from.Rowe.1983">*1</SimpleData>
							<SimpleData name="FINAL.BIOMASS..mg.C.per.m2">1390</SimpleData>
							<SimpleData name="REFERENCE">Deming &amp; Carpenter 2008</SimpleData>
							<SimpleData name="PROVIDER">Jody W. Deming</SimpleData>
							<SimpleData name="BODY.OF.WATER">Gulf of Mexico</SimpleData>
							<SimpleData name="REGION">Gulf of Mexico</SimpleData>
							<SimpleData name="OCEAN.SEA">Gulf of Mexico</SimpleData>
							<SimpleData name="HABITAT">Continental Slope</SimpleData>
							<SimpleData name="COMMENTS"></SimpleData>
						</SchemaData>
					</ExtendedData>
					<Point>
						<coordinates>-95.00311000000001,26.5047,0</coordinates>
					</Point>
				</Placemark>
				<Placemark>
					<styleUrl>#m_ylw-pushpin</styleUrl>
					<ExtendedData>
						<SchemaData schemaUrl="#data">
							<SimpleData name="CATEGORY">bacteria</SimpleData>
							<SimpleData name="STATION">RW6</SimpleData>
							<SimpleData name="REPLICATION">1-RW6-1</SimpleData>
							<SimpleData name="DEPTH.m">3015</SimpleData>
							<SimpleData name="DATE.UTC">5/18/2000</SimpleData>
							<SimpleData name="GEAR">Box Core</SimpleData>
							<SimpleData name="GEAR2">Core</SimpleData>
							<SimpleData name="SEDIMENT.DEPTH.cm">15</SimpleData>
							<SimpleData name="AREA.m2"></SimpleData>
							<SimpleData name="ABUNDANCE.per.m2">97800000000000</SimpleData>
							<SimpleData name="DATA.TYPE.ABUNDANCE">Raw</SimpleData>
							<SimpleData name="CARBON.WT.mg.C.per.m2">1230</SimpleData>
							<SimpleData name="FINAL.UNIT.TYPE">organic C</SimpleData>
							<SimpleData name="CONVERSION.FACTOR.from.Rowe.1983">*1</SimpleData>
							<SimpleData name="FINAL.BIOMASS..mg.C.per.m2">1230</SimpleData>
							<SimpleData name="REFERENCE">Deming &amp; Carpenter 2008</SimpleData>
							<SimpleData name="PROVIDER">Jody W. Deming</SimpleData>
							<SimpleData name="BODY.OF.WATER">Gulf of Mexico</SimpleData>
							<SimpleData name="REGION">Gulf of Mexico</SimpleData>
							<SimpleData name="OCEAN.SEA">Gulf of Mexico</SimpleData>
							<SimpleData name="HABITAT">Continental Slope</SimpleData>
							<SimpleData name="COMMENTS"></SimpleData>
						</SchemaData>
					</ExtendedData>
					<Point>
						<coordinates>-94.49601000000001,25.9987,0</coordinates>
					</Point>
				</Placemark>
				<Placemark>
					<styleUrl>#m_ylw-pushpin</styleUrl>
					<ExtendedData>
						<SchemaData schemaUrl="#data">
							<SimpleData name="CATEGORY">bacteria</SimpleData>
							<SimpleData name="STATION">S35</SimpleData>
							<SimpleData name="REPLICATION">1-S35-1</SimpleData>
							<SimpleData name="DEPTH.m">658</SimpleData>
							<SimpleData name="DATE.UTC">6/11/2000</SimpleData>
							<SimpleData name="GEAR">Box Core</SimpleData>
							<SimpleData name="GEAR2">Core</SimpleData>
							<SimpleData name="SEDIMENT.DEPTH.cm">15</SimpleData>
							<SimpleData name="AREA.m2"></SimpleData>
							<SimpleData name="ABUNDANCE.per.m2">143000000000000</SimpleData>
							<SimpleData name="DATA.TYPE.ABUNDANCE">Raw</SimpleData>
							<SimpleData name="CARBON.WT.mg.C.per.m2">2670</SimpleData>
							<SimpleData name="FINAL.UNIT.TYPE">organic C</SimpleData>
							<SimpleData name="CONVERSION.FACTOR.from.Rowe.1983">*1</SimpleData>
							<SimpleData name="FINAL.BIOMASS..mg.C.per.m2">2670</SimpleData>
							<SimpleData name="REFERENCE">Deming &amp; Carpenter 2008</SimpleData>
							<SimpleData name="PROVIDER">Jody W. Deming</SimpleData>
							<SimpleData name="BODY.OF.WATER">Gulf of Mexico</SimpleData>
							<SimpleData name="REGION">Gulf of Mexico</SimpleData>
							<SimpleData name="OCEAN.SEA">Gulf of Mexico</SimpleData>
							<SimpleData name="HABITAT">Continental Slope</SimpleData>
							<SimpleData name="COMMENTS"></SimpleData>
						</SchemaData>
					</ExtendedData>
					<Point>
						<coordinates>-87.05626,29.33417,0</coordinates>
					</Point>
				</Placemark>
				<Placemark>
					<styleUrl>#m_ylw-pushpin</styleUrl>
					<ExtendedData>
						<SchemaData schemaUrl="#data">
							<SimpleData name="CATEGORY">bacteria</SimpleData>
							<SimpleData name="STATION">S36</SimpleData>
							<SimpleData name="REPLICATION">1-S36-1</SimpleData>
							<SimpleData name="DEPTH.m">1825</SimpleData>
							<SimpleData name="DATE.UTC">6/12/2000</SimpleData>
							<SimpleData name="GEAR">Box Core</SimpleData>
							<SimpleData name="GEAR2">Core</SimpleData>
							<SimpleData name="SEDIMENT.DEPTH.cm">15</SimpleData>
							<SimpleData name="AREA.m2"></SimpleData>
							<SimpleData name="ABUNDANCE.per.m2">110000000000000</SimpleData>
							<SimpleData name="DATA.TYPE.ABUNDANCE">Raw</SimpleData>
							<SimpleData name="CARBON.WT.mg.C.per.m2">1850</SimpleData>
							<SimpleData name="FINAL.UNIT.TYPE">organic C</SimpleData>
							<SimpleData name="CONVERSION.FACTOR.from.Rowe.1983">*1</SimpleData>
							<SimpleData name="FINAL.BIOMASS..mg.C.per.m2">1850</SimpleData>
							<SimpleData name="REFERENCE">Deming &amp; Carpenter 2008</SimpleData>
							<SimpleData name="PROVIDER">Jody W. Deming</SimpleData>
							<SimpleData name="BODY.OF.WATER">Gulf of Mexico</SimpleData>
							<SimpleData name="REGION">Gulf of Mexico</SimpleData>
							<SimpleData name="OCEAN.SEA">Gulf of Mexico</SimpleData>
							<SimpleData name="HABITAT">Continental Slope</SimpleData>
							<SimpleData name="COMMENTS"></SimpleData>
						</SchemaData>
					</ExtendedData>
					<Point>
						<coordinates>-87.67039,28.91941,0</coordinates>
					</Point>
				</Placemark>
				<Placemark>
					<styleUrl>#m_ylw-pushpin</styleUrl>
					<ExtendedData>
						<SchemaData schemaUrl="#data">
							<SimpleData name="CATEGORY">bacteria</SimpleData>
							<SimpleData name="STATION">S37</SimpleData>
							<SimpleData name="REPLICATION">1-S37-1</SimpleData>
							<SimpleData name="DEPTH.m">2388</SimpleData>
							<SimpleData name="DATE.UTC">6/13/2000</SimpleData>
							<SimpleData name="GEAR">Box Core</SimpleData>
							<SimpleData name="GEAR2">Core</SimpleData>
							<SimpleData name="SEDIMENT.DEPTH.cm">15</SimpleData>
							<SimpleData name="AREA.m2"></SimpleData>
							<SimpleData name="ABUNDANCE.per.m2">108000000000000</SimpleData>
							<SimpleData name="DATA.TYPE.ABUNDANCE">Raw</SimpleData>
							<SimpleData name="CARBON.WT.mg.C.per.m2">1540</SimpleData>
							<SimpleData name="FINAL.UNIT.TYPE">organic C</SimpleData>
							<SimpleData name="CONVERSION.FACTOR.from.Rowe.1983">*1</SimpleData>
							<SimpleData name="FINAL.BIOMASS..mg.C.per.m2">1540</SimpleData>
							<SimpleData name="REFERENCE">Deming &amp; Carpenter 2008</SimpleData>
							<SimpleData name="PROVIDER">Jody W. Deming</SimpleData>
							<SimpleData name="BODY.OF.WATER">Gulf of Mexico</SimpleData>
							<SimpleData name="REGION">Gulf of Mexico</SimpleData>
							<SimpleData name="OCEAN.SEA">Gulf of Mexico</SimpleData>
							<SimpleData name="HABITAT">Continental Slope</SimpleData>
							<SimpleData name="COMMENTS"></SimpleData>
						</SchemaData>
					</ExtendedData>
					<Point>
						<coordinates>-87.76226,28.55676,0</coordinates>
					</Point>
				</Placemark>
				<Placemark>
					<styleUrl>#m_ylw-pushpin</styleUrl>
					<ExtendedData>
						<SchemaData schemaUrl="#data">
							<SimpleData name="CATEGORY">bacteria</SimpleData>
							<SimpleData name="STATION">S38</SimpleData>
							<SimpleData name="REPLICATION">1-S38-1</SimpleData>
							<SimpleData name="DEPTH.m">2635</SimpleData>
							<SimpleData name="DATE.UTC">6/14/2000</SimpleData>
							<SimpleData name="GEAR">Box Core</SimpleData>
							<SimpleData name="GEAR2">Core</SimpleData>
							<SimpleData name="SEDIMENT.DEPTH.cm">15</SimpleData>
							<SimpleData name="AREA.m2"></SimpleData>
							<SimpleData name="ABUNDANCE.per.m2">88300000000000</SimpleData>
							<SimpleData name="DATA.TYPE.ABUNDANCE">Raw</SimpleData>
							<SimpleData name="CARBON.WT.mg.C.per.m2">1200</SimpleData>
							<SimpleData name="FINAL.UNIT.TYPE">organic C</SimpleData>
							<SimpleData name="CONVERSION.FACTOR.from.Rowe.1983">*1</SimpleData>
							<SimpleData name="FINAL.BIOMASS..mg.C.per.m2">1200</SimpleData>
							<SimpleData name="REFERENCE">Deming &amp; Carpenter 2008</SimpleData>
							<SimpleData name="PROVIDER">Jody W. Deming</SimpleData>
							<SimpleData name="BODY.OF.WATER">Gulf of Mexico</SimpleData>
							<SimpleData name="REGION">Gulf of Mexico</SimpleData>
							<SimpleData name="OCEAN.SEA">Gulf of Mexico</SimpleData>
							<SimpleData name="HABITAT">Continental Slope</SimpleData>
							<SimpleData name="COMMENTS"></SimpleData>
						</SchemaData>
					</ExtendedData>
					<Point>
						<coordinates>-87.33174,28.27458,0</coordinates>
					</Point>
				</Placemark>
				<Placemark>
					<styleUrl>#m_ylw-pushpin</styleUrl>
					<ExtendedData>
						<SchemaData schemaUrl="#data">
							<SimpleData name="CATEGORY">bacteria</SimpleData>
							<SimpleData name="STATION">S39</SimpleData>
							<SimpleData name="REPLICATION">1-S39-1</SimpleData>
							<SimpleData name="DEPTH.m">3007</SimpleData>
							<SimpleData name="DATE.UTC">6/6/2000</SimpleData>
							<SimpleData name="GEAR">Box Core</SimpleData>
							<SimpleData name="GEAR2">Core</SimpleData>
							<SimpleData name="SEDIMENT.DEPTH.cm">15</SimpleData>
							<SimpleData name="AREA.m2"></SimpleData>
							<SimpleData name="ABUNDANCE.per.m2">73600000000000</SimpleData>
							<SimpleData name="DATA.TYPE.ABUNDANCE">Raw</SimpleData>
							<SimpleData name="CARBON.WT.mg.C.per.m2">930</SimpleData>
							<SimpleData name="FINAL.UNIT.TYPE">organic C</SimpleData>
							<SimpleData name="CONVERSION.FACTOR.from.Rowe.1983">*1</SimpleData>
							<SimpleData name="FINAL.BIOMASS..mg.C.per.m2">930</SimpleData>
							<SimpleData name="REFERENCE">Deming &amp; Carpenter 2008</SimpleData>
							<SimpleData name="PROVIDER">Jody W. Deming</SimpleData>
							<SimpleData name="BODY.OF.WATER">Gulf of Mexico</SimpleData>
							<SimpleData name="REGION">Gulf of Mexico</SimpleData>
							<SimpleData name="OCEAN.SEA">Gulf of Mexico</SimpleData>
							<SimpleData name="HABITAT">Continental Slope</SimpleData>
							<SimpleData name="COMMENTS"></SimpleData>
						</SchemaData>
					</ExtendedData>
					<Point>
						<coordinates>-87.00142,27.49917,0</coordinates>
					</Point>
				</Placemark>
				<Placemark>
					<styleUrl>#m_ylw-pushpin</styleUrl>
					<ExtendedData>
						<SchemaData schemaUrl="#data">
							<SimpleData name="CATEGORY">bacteria</SimpleData>
							<SimpleData name="STATION">S40</SimpleData>
							<SimpleData name="REPLICATION">1-S40-1</SimpleData>
							<SimpleData name="DEPTH.m">2975</SimpleData>
							<SimpleData name="DATE.UTC">6/7/2000</SimpleData>
							<SimpleData name="GEAR">Box Core</SimpleData>
							<SimpleData name="GEAR2">Core</SimpleData>
							<SimpleData name="SEDIMENT.DEPTH.cm">15</SimpleData>
							<SimpleData name="AREA.m2"></SimpleData>
							<SimpleData name="ABUNDANCE.per.m2">65600000000000</SimpleData>
							<SimpleData name="DATA.TYPE.ABUNDANCE">Raw</SimpleData>
							<SimpleData name="CARBON.WT.mg.C.per.m2">830</SimpleData>
							<SimpleData name="FINAL.UNIT.TYPE">organic C</SimpleData>
							<SimpleData name="CONVERSION.FACTOR.from.Rowe.1983">*1</SimpleData>
							<SimpleData name="FINAL.BIOMASS..mg.C.per.m2">830</SimpleData>
							<SimpleData name="REFERENCE">Deming &amp; Carpenter 2008</SimpleData>
							<SimpleData name="PROVIDER">Jody W. Deming</SimpleData>
							<SimpleData name="BODY.OF.WATER">Gulf of Mexico</SimpleData>
							<SimpleData name="REGION">Gulf of Mexico</SimpleData>
							<SimpleData name="OCEAN.SEA">Gulf of Mexico</SimpleData>
							<SimpleData name="HABITAT">Continental Slope</SimpleData>
							<SimpleData name="COMMENTS"></SimpleData>
						</SchemaData>
					</ExtendedData>
					<Point>
						<coordinates>-86.75258,27.83892,0</coordinates>
					</Point>
				</Placemark>
				<Placemark>
					<styleUrl>#m_ylw-pushpin</styleUrl>
					<ExtendedData>
						<SchemaData schemaUrl="#data">
							<SimpleData name="CATEGORY">bacteria</SimpleData>
							<SimpleData name="STATION">S41</SimpleData>
							<SimpleData name="REPLICATION">1-S41-1</SimpleData>
							<SimpleData name="DEPTH.m">2974</SimpleData>
							<SimpleData name="DATE.UTC">6/8/2000</SimpleData>
							<SimpleData name="GEAR">Box Core</SimpleData>
							<SimpleData name="GEAR2">Core</SimpleData>
							<SimpleData name="SEDIMENT.DEPTH.cm">15</SimpleData>
							<SimpleData name="AREA.m2"></SimpleData>
							<SimpleData name="ABUNDANCE.per.m2">86400000000000</SimpleData>
							<SimpleData name="DATA.TYPE.ABUNDANCE">Raw</SimpleData>
							<SimpleData name="CARBON.WT.mg.C.per.m2">1100</SimpleData>
							<SimpleData name="FINAL.UNIT.TYPE">organic C</SimpleData>
							<SimpleData name="CONVERSION.FACTOR.from.Rowe.1983">*1</SimpleData>
							<SimpleData name="FINAL.BIOMASS..mg.C.per.m2">1100</SimpleData>
							<SimpleData name="REFERENCE">Deming &amp; Carpenter 2008</SimpleData>
							<SimpleData name="PROVIDER">Jody W. Deming</SimpleData>
							<SimpleData name="BODY.OF.WATER">Gulf of Mexico</SimpleData>
							<SimpleData name="REGION">Gulf of Mexico</SimpleData>
							<SimpleData name="OCEAN.SEA">Gulf of Mexico</SimpleData>
							<SimpleData name="HABITAT">Continental Slope</SimpleData>
							<SimpleData name="COMMENTS"></SimpleData>
						</SchemaData>
					</ExtendedData>
					<Point>
						<coordinates>-86.57598,28.01411,0</coordinates>
					</Point>
				</Placemark>
				<Placemark>
					<styleUrl>#m_ylw-pushpin</styleUrl>
					<ExtendedData>
						<SchemaData schemaUrl="#data">
							<SimpleData name="CATEGORY">bacteria</SimpleData>
							<SimpleData name="STATION">S42</SimpleData>
							<SimpleData name="REPLICATION">1-S42-1</SimpleData>
							<SimpleData name="DEPTH.m">750</SimpleData>
							<SimpleData name="DATE.UTC">6/9/2000</SimpleData>
							<SimpleData name="GEAR">Box Core</SimpleData>
							<SimpleData name="GEAR2">Core</SimpleData>
							<SimpleData name="SEDIMENT.DEPTH.cm">15</SimpleData>
							<SimpleData name="AREA.m2"></SimpleData>
							<SimpleData name="ABUNDANCE.per.m2">65800000000000</SimpleData>
							<SimpleData name="DATA.TYPE.ABUNDANCE">Raw</SimpleData>
							<SimpleData name="CARBON.WT.mg.C.per.m2">1300</SimpleData>
							<SimpleData name="FINAL.UNIT.TYPE">organic C</SimpleData>
							<SimpleData name="CONVERSION.FACTOR.from.Rowe.1983">*1</SimpleData>
							<SimpleData name="FINAL.BIOMASS..mg.C.per.m2">1300</SimpleData>
							<SimpleData name="REFERENCE">Deming &amp; Carpenter 2008</SimpleData>
							<SimpleData name="PROVIDER">Jody W. Deming</SimpleData>
							<SimpleData name="BODY.OF.WATER">Gulf of Mexico</SimpleData>
							<SimpleData name="REGION">Gulf of Mexico</SimpleData>
							<SimpleData name="OCEAN.SEA">Gulf of Mexico</SimpleData>
							<SimpleData name="HABITAT">Continental Slope</SimpleData>
							<SimpleData name="COMMENTS"></SimpleData>
						</SchemaData>
					</ExtendedData>
					<Point>
						<coordinates>-86.41777,28.2526,0</coordinates>
					</Point>
				</Placemark>
				<Placemark>
					<styleUrl>#m_ylw-pushpin</styleUrl>
					<ExtendedData>
						<SchemaData schemaUrl="#data">
							<SimpleData name="CATEGORY">bacteria</SimpleData>
							<SimpleData name="STATION">S43</SimpleData>
							<SimpleData name="REPLICATION">1-S43-1</SimpleData>
							<SimpleData name="DEPTH.m">366</SimpleData>
							<SimpleData name="DATE.UTC">6/10/2000</SimpleData>
							<SimpleData name="GEAR">Box Core</SimpleData>
							<SimpleData name="GEAR2">Core</SimpleData>
							<SimpleData name="SEDIMENT.DEPTH.cm">15</SimpleData>
							<SimpleData name="AREA.m2"></SimpleData>
							<SimpleData name="ABUNDANCE.per.m2">92100000000000</SimpleData>
							<SimpleData name="DATA.TYPE.ABUNDANCE">Raw</SimpleData>
							<SimpleData name="CARBON.WT.mg.C.per.m2">1790</SimpleData>
							<SimpleData name="FINAL.UNIT.TYPE">organic C</SimpleData>
							<SimpleData name="CONVERSION.FACTOR.from.Rowe.1983">*1</SimpleData>
							<SimpleData name="FINAL.BIOMASS..mg.C.per.m2">1790</SimpleData>
							<SimpleData name="REFERENCE">Deming &amp; Carpenter 2008</SimpleData>
							<SimpleData name="PROVIDER">Jody W. Deming</SimpleData>
							<SimpleData name="BODY.OF.WATER">Gulf of Mexico</SimpleData>
							<SimpleData name="REGION">Gulf of Mexico</SimpleData>
							<SimpleData name="OCEAN.SEA">Gulf of Mexico</SimpleData>
							<SimpleData name="HABITAT">Continental Slope</SimpleData>
							<SimpleData name="COMMENTS"></SimpleData>
						</SchemaData>
					</ExtendedData>
					<Point>
						<coordinates>-86.07997,28.50173,0</coordinates>
					</Point>
				</Placemark>
				<Placemark>
					<styleUrl>#m_ylw-pushpin</styleUrl>
					<ExtendedData>
						<SchemaData schemaUrl="#data">
							<SimpleData name="CATEGORY">bacteria</SimpleData>
							<SimpleData name="STATION">S44</SimpleData>
							<SimpleData name="REPLICATION">1-S44-1</SimpleData>
							<SimpleData name="DEPTH.m">215</SimpleData>
							<SimpleData name="DATE.UTC">6/10/2000</SimpleData>
							<SimpleData name="GEAR">Box Core</SimpleData>
							<SimpleData name="GEAR2">Core</SimpleData>
							<SimpleData name="SEDIMENT.DEPTH.cm">15</SimpleData>
							<SimpleData name="AREA.m2"></SimpleData>
							<SimpleData name="ABUNDANCE.per.m2">131000000000000</SimpleData>
							<SimpleData name="DATA.TYPE.ABUNDANCE">Raw</SimpleData>
							<SimpleData name="CARBON.WT.mg.C.per.m2">2600</SimpleData>
							<SimpleData name="FINAL.UNIT.TYPE">organic C</SimpleData>
							<SimpleData name="CONVERSION.FACTOR.from.Rowe.1983">*1</SimpleData>
							<SimpleData name="FINAL.BIOMASS..mg.C.per.m2">2600</SimpleData>
							<SimpleData name="REFERENCE">Deming &amp; Carpenter 2008</SimpleData>
							<SimpleData name="PROVIDER">Jody W. Deming</SimpleData>
							<SimpleData name="BODY.OF.WATER">Gulf of Mexico</SimpleData>
							<SimpleData name="REGION">Gulf of Mexico</SimpleData>
							<SimpleData name="OCEAN.SEA">Gulf of Mexico</SimpleData>
							<SimpleData name="HABITAT">Continental Slope</SimpleData>
							<SimpleData name="COMMENTS"></SimpleData>
						</SchemaData>
					</ExtendedData>
					<Point>
						<coordinates>-85.74800999999999,28.75105,0</coordinates>
					</Point>
				</Placemark>
				<Placemark>
					<styleUrl>#m_ylw-pushpin</styleUrl>
					<ExtendedData>
						<SchemaData schemaUrl="#data">
							<SimpleData name="CATEGORY">bacteria</SimpleData>
							<SimpleData name="STATION">W1</SimpleData>
							<SimpleData name="REPLICATION">1-W1-1</SimpleData>
							<SimpleData name="DEPTH.m">375</SimpleData>
							<SimpleData name="DATE.UTC">5/13/2000</SimpleData>
							<SimpleData name="GEAR">Box Core</SimpleData>
							<SimpleData name="GEAR2">Core</SimpleData>
							<SimpleData name="SEDIMENT.DEPTH.cm">15</SimpleData>
							<SimpleData name="AREA.m2"></SimpleData>
							<SimpleData name="ABUNDANCE.per.m2">72800000000000</SimpleData>
							<SimpleData name="DATA.TYPE.ABUNDANCE">Raw</SimpleData>
							<SimpleData name="CARBON.WT.mg.C.per.m2">1410</SimpleData>
							<SimpleData name="FINAL.UNIT.TYPE">organic C</SimpleData>
							<SimpleData name="CONVERSION.FACTOR.from.Rowe.1983">*1</SimpleData>
							<SimpleData name="FINAL.BIOMASS..mg.C.per.m2">1410</SimpleData>
							<SimpleData name="REFERENCE">Deming &amp; Carpenter 2008</SimpleData>
							<SimpleData name="PROVIDER">Jody W. Deming</SimpleData>
							<SimpleData name="BODY.OF.WATER">Gulf of Mexico</SimpleData>
							<SimpleData name="REGION">Gulf of Mexico</SimpleData>
							<SimpleData name="OCEAN.SEA">Gulf of Mexico</SimpleData>
							<SimpleData name="HABITAT">Continental Slope</SimpleData>
							<SimpleData name="COMMENTS"></SimpleData>
						</SchemaData>
					</ExtendedData>
					<Point>
						<coordinates>-93.54762,27.57965,0</coordinates>
					</Point>
				</Placemark>
				<Placemark>
					<styleUrl>#m_ylw-pushpin</styleUrl>
					<ExtendedData>
						<SchemaData schemaUrl="#data">
							<SimpleData name="CATEGORY">bacteria</SimpleData>
							<SimpleData name="STATION">W2</SimpleData>
							<SimpleData name="REPLICATION">1-W2-1</SimpleData>
							<SimpleData name="DEPTH.m">625</SimpleData>
							<SimpleData name="DATE.UTC">5/14/2000</SimpleData>
							<SimpleData name="GEAR">Box Core</SimpleData>
							<SimpleData name="GEAR2">Core</SimpleData>
							<SimpleData name="SEDIMENT.DEPTH.cm">15</SimpleData>
							<SimpleData name="AREA.m2"></SimpleData>
							<SimpleData name="ABUNDANCE.per.m2">92900000000000</SimpleData>
							<SimpleData name="DATA.TYPE.ABUNDANCE">Raw</SimpleData>
							<SimpleData name="CARBON.WT.mg.C.per.m2">1750</SimpleData>
							<SimpleData name="FINAL.UNIT.TYPE">organic C</SimpleData>
							<SimpleData name="CONVERSION.FACTOR.from.Rowe.1983">*1</SimpleData>
							<SimpleData name="FINAL.BIOMASS..mg.C.per.m2">1750</SimpleData>
							<SimpleData name="REFERENCE">Deming &amp; Carpenter 2008</SimpleData>
							<SimpleData name="PROVIDER">Jody W. Deming</SimpleData>
							<SimpleData name="BODY.OF.WATER">Gulf of Mexico</SimpleData>
							<SimpleData name="REGION">Gulf of Mexico</SimpleData>
							<SimpleData name="OCEAN.SEA">Gulf of Mexico</SimpleData>
							<SimpleData name="HABITAT">Continental Slope</SimpleData>
							<SimpleData name="COMMENTS"></SimpleData>
						</SchemaData>
					</ExtendedData>
					<Point>
						<coordinates>-93.33763,27.41335,0</coordinates>
					</Point>
				</Placemark>
				<Placemark>
					<styleUrl>#m_ylw-pushpin</styleUrl>
					<ExtendedData>
						<SchemaData schemaUrl="#data">
							<SimpleData name="CATEGORY">bacteria</SimpleData>
							<SimpleData name="STATION">W3</SimpleData>
							<SimpleData name="REPLICATION">1-W3-2</SimpleData>
							<SimpleData name="DEPTH.m">860</SimpleData>
							<SimpleData name="DATE.UTC">5/14/2000</SimpleData>
							<SimpleData name="GEAR">Box Core</SimpleData>
							<SimpleData name="GEAR2">Core</SimpleData>
							<SimpleData name="SEDIMENT.DEPTH.cm">15</SimpleData>
							<SimpleData name="AREA.m2"></SimpleData>
							<SimpleData name="ABUNDANCE.per.m2">44000000000000</SimpleData>
							<SimpleData name="DATA.TYPE.ABUNDANCE">Raw</SimpleData>
							<SimpleData name="CARBON.WT.mg.C.per.m2">800</SimpleData>
							<SimpleData name="FINAL.UNIT.TYPE">organic C</SimpleData>
							<SimpleData name="CONVERSION.FACTOR.from.Rowe.1983">*1</SimpleData>
							<SimpleData name="FINAL.BIOMASS..mg.C.per.m2">800</SimpleData>
							<SimpleData name="REFERENCE">Deming &amp; Carpenter 2008</SimpleData>
							<SimpleData name="PROVIDER">Jody W. Deming</SimpleData>
							<SimpleData name="BODY.OF.WATER">Gulf of Mexico</SimpleData>
							<SimpleData name="REGION">Gulf of Mexico</SimpleData>
							<SimpleData name="OCEAN.SEA">Gulf of Mexico</SimpleData>
							<SimpleData name="HABITAT">Continental Slope</SimpleData>
							<SimpleData name="COMMENTS"></SimpleData>
						</SchemaData>
					</ExtendedData>
					<Point>
						<coordinates>-93.32219000000002,27.17307,0</coordinates>
					</Point>
				</Placemark>
				<Placemark>
					<styleUrl>#m_ylw-pushpin</styleUrl>
					<ExtendedData>
						<SchemaData schemaUrl="#data">
							<SimpleData name="CATEGORY">bacteria</SimpleData>
							<SimpleData name="STATION">W4</SimpleData>
							<SimpleData name="REPLICATION">1-W4-1</SimpleData>
							<SimpleData name="DEPTH.m">1420</SimpleData>
							<SimpleData name="DATE.UTC">5/15/2000</SimpleData>
							<SimpleData name="GEAR">Box Core</SimpleData>
							<SimpleData name="GEAR2">Core</SimpleData>
							<SimpleData name="SEDIMENT.DEPTH.cm">15</SimpleData>
							<SimpleData name="AREA.m2"></SimpleData>
							<SimpleData name="ABUNDANCE.per.m2">80800000000000</SimpleData>
							<SimpleData name="DATA.TYPE.ABUNDANCE">Raw</SimpleData>
							<SimpleData name="CARBON.WT.mg.C.per.m2">1350</SimpleData>
							<SimpleData name="FINAL.UNIT.TYPE">organic C</SimpleData>
							<SimpleData name="CONVERSION.FACTOR.from.Rowe.1983">*1</SimpleData>
							<SimpleData name="FINAL.BIOMASS..mg.C.per.m2">1350</SimpleData>
							<SimpleData name="REFERENCE">Deming &amp; Carpenter 2008</SimpleData>
							<SimpleData name="PROVIDER">Jody W. Deming</SimpleData>
							<SimpleData name="BODY.OF.WATER">Gulf of Mexico</SimpleData>
							<SimpleData name="REGION">Gulf of Mexico</SimpleData>
							<SimpleData name="OCEAN.SEA">Gulf of Mexico</SimpleData>
							<SimpleData name="HABITAT">Continental Slope</SimpleData>
							<SimpleData name="COMMENTS"></SimpleData>
						</SchemaData>
					</ExtendedData>
					<Point>
						<coordinates>-93.31950999999999,26.73171,0</coordinates>
					</Point>
				</Placemark>
				<Placemark>
					<styleUrl>#m_ylw-pushpin</styleUrl>
					<ExtendedData>
						<SchemaData schemaUrl="#data">
							<SimpleData name="CATEGORY">bacteria</SimpleData>
							<SimpleData name="STATION">W5</SimpleData>
							<SimpleData name="REPLICATION">1-W5-2A</SimpleData>
							<SimpleData name="DEPTH.m">2740</SimpleData>
							<SimpleData name="DATE.UTC">5/16/2000</SimpleData>
							<SimpleData name="GEAR">Box Core</SimpleData>
							<SimpleData name="GEAR2">Core</SimpleData>
							<SimpleData name="SEDIMENT.DEPTH.cm">15</SimpleData>
							<SimpleData name="AREA.m2"></SimpleData>
							<SimpleData name="ABUNDANCE.per.m2">74700000000000</SimpleData>
							<SimpleData name="DATA.TYPE.ABUNDANCE">Raw</SimpleData>
							<SimpleData name="CARBON.WT.mg.C.per.m2">990</SimpleData>
							<SimpleData name="FINAL.UNIT.TYPE">organic C</SimpleData>
							<SimpleData name="CONVERSION.FACTOR.from.Rowe.1983">*1</SimpleData>
							<SimpleData name="FINAL.BIOMASS..mg.C.per.m2">990</SimpleData>
							<SimpleData name="REFERENCE">Deming &amp; Carpenter 2008</SimpleData>
							<SimpleData name="PROVIDER">Jody W. Deming</SimpleData>
							<SimpleData name="BODY.OF.WATER">Gulf of Mexico</SimpleData>
							<SimpleData name="REGION">Gulf of Mexico</SimpleData>
							<SimpleData name="OCEAN.SEA">Gulf of Mexico</SimpleData>
							<SimpleData name="HABITAT">Continental Slope</SimpleData>
							<SimpleData name="COMMENTS"></SimpleData>
						</SchemaData>
					</ExtendedData>
					<Point>
						<coordinates>-93.36218,26.2763,0</coordinates>
					</Point>
				</Placemark>
				<Placemark>
					<styleUrl>#m_ylw-pushpin</styleUrl>
					<ExtendedData>
						<SchemaData schemaUrl="#data">
							<SimpleData name="CATEGORY">bacteria</SimpleData>
							<SimpleData name="STATION">W6</SimpleData>
							<SimpleData name="REPLICATION">1-W6-1</SimpleData>
							<SimpleData name="DEPTH.m">3140</SimpleData>
							<SimpleData name="DATE.UTC">5/17/2000</SimpleData>
							<SimpleData name="GEAR">Box Core</SimpleData>
							<SimpleData name="GEAR2">Core</SimpleData>
							<SimpleData name="SEDIMENT.DEPTH.cm">15</SimpleData>
							<SimpleData name="AREA.m2"></SimpleData>
							<SimpleData name="ABUNDANCE.per.m2">71200000000000</SimpleData>
							<SimpleData name="DATA.TYPE.ABUNDANCE">Raw</SimpleData>
							<SimpleData name="CARBON.WT.mg.C.per.m2">870</SimpleData>
							<SimpleData name="FINAL.UNIT.TYPE">organic C</SimpleData>
							<SimpleData name="CONVERSION.FACTOR.from.Rowe.1983">*1</SimpleData>
							<SimpleData name="FINAL.BIOMASS..mg.C.per.m2">870</SimpleData>
							<SimpleData name="REFERENCE">Deming &amp; Carpenter 2008</SimpleData>
							<SimpleData name="PROVIDER">Jody W. Deming</SimpleData>
							<SimpleData name="BODY.OF.WATER">Gulf of Mexico</SimpleData>
							<SimpleData name="REGION">Gulf of Mexico</SimpleData>
							<SimpleData name="OCEAN.SEA">Gulf of Mexico</SimpleData>
							<SimpleData name="HABITAT">Continental Slope</SimpleData>
							<SimpleData name="COMMENTS"></SimpleData>
						</SchemaData>
					</ExtendedData>
					<Point>
						<coordinates>-93.32028,26.00285,0</coordinates>
					</Point>
				</Placemark>
				<Placemark>
					<styleUrl>#m_ylw-pushpin</styleUrl>
					<ExtendedData>
						<SchemaData schemaUrl="#data">
							<SimpleData name="CATEGORY">bacteria</SimpleData>
							<SimpleData name="STATION">WC12</SimpleData>
							<SimpleData name="REPLICATION">1-WC12-1</SimpleData>
							<SimpleData name="DEPTH.m">1200</SimpleData>
							<SimpleData name="DATE.UTC">5/5/2000</SimpleData>
							<SimpleData name="GEAR">Box Core</SimpleData>
							<SimpleData name="GEAR2">Core</SimpleData>
							<SimpleData name="SEDIMENT.DEPTH.cm">15</SimpleData>
							<SimpleData name="AREA.m2"></SimpleData>
							<SimpleData name="ABUNDANCE.per.m2">83400000000000</SimpleData>
							<SimpleData name="DATA.TYPE.ABUNDANCE">Raw</SimpleData>
							<SimpleData name="CARBON.WT.mg.C.per.m2">1440</SimpleData>
							<SimpleData name="FINAL.UNIT.TYPE">organic C</SimpleData>
							<SimpleData name="CONVERSION.FACTOR.from.Rowe.1983">*1</SimpleData>
							<SimpleData name="FINAL.BIOMASS..mg.C.per.m2">1440</SimpleData>
							<SimpleData name="REFERENCE">Deming &amp; Carpenter 2008</SimpleData>
							<SimpleData name="PROVIDER">Jody W. Deming</SimpleData>
							<SimpleData name="BODY.OF.WATER">Gulf of Mexico</SimpleData>
							<SimpleData name="REGION">Gulf of Mexico</SimpleData>
							<SimpleData name="OCEAN.SEA">Gulf of Mexico</SimpleData>
							<SimpleData name="HABITAT">Continental Slope</SimpleData>
							<SimpleData name="COMMENTS"></SimpleData>
						</SchemaData>
					</ExtendedData>
					<Point>
						<coordinates>-91.55580999999999,27.32324,0</coordinates>
					</Point>
				</Placemark>
				<Placemark>
					<styleUrl>#m_ylw-pushpin</styleUrl>
					<ExtendedData>
						<SchemaData schemaUrl="#data">
							<SimpleData name="CATEGORY">bacteria</SimpleData>
							<SimpleData name="STATION">WC5</SimpleData>
							<SimpleData name="REPLICATION">1-WC5-1</SimpleData>
							<SimpleData name="DEPTH.m">400</SimpleData>
							<SimpleData name="DATE.UTC">5/4/2000</SimpleData>
							<SimpleData name="GEAR">Box Core</SimpleData>
							<SimpleData name="GEAR2">Core</SimpleData>
							<SimpleData name="SEDIMENT.DEPTH.cm">15</SimpleData>
							<SimpleData name="AREA.m2"></SimpleData>
							<SimpleData name="ABUNDANCE.per.m2">55600000000000</SimpleData>
							<SimpleData name="DATA.TYPE.ABUNDANCE">Raw</SimpleData>
							<SimpleData name="CARBON.WT.mg.C.per.m2">1080</SimpleData>
							<SimpleData name="FINAL.UNIT.TYPE">organic C</SimpleData>
							<SimpleData name="CONVERSION.FACTOR.from.Rowe.1983">*1</SimpleData>
							<SimpleData name="FINAL.BIOMASS..mg.C.per.m2">1080</SimpleData>
							<SimpleData name="REFERENCE">Deming &amp; Carpenter 2008</SimpleData>
							<SimpleData name="PROVIDER">Jody W. Deming</SimpleData>
							<SimpleData name="BODY.OF.WATER">Gulf of Mexico</SimpleData>
							<SimpleData name="REGION">Gulf of Mexico</SimpleData>
							<SimpleData name="OCEAN.SEA">Gulf of Mexico</SimpleData>
							<SimpleData name="HABITAT">Continental Slope</SimpleData>
							<SimpleData name="COMMENTS"></SimpleData>
						</SchemaData>
					</ExtendedData>
					<Point>
						<coordinates>-91.76215999999999,27.7714,0</coordinates>
					</Point>
				</Placemark>
				<Placemark>
					<styleUrl>#m_ylw-pushpin</styleUrl>
					<ExtendedData>
						<SchemaData schemaUrl="#data">
							<SimpleData name="CATEGORY">bacteria</SimpleData>
							<SimpleData name="STATION">BH</SimpleData>
							<SimpleData name="REPLICATION">2-BH-2</SimpleData>
							<SimpleData name="DEPTH.m">548</SimpleData>
							<SimpleData name="DATE.UTC">6/18/2001</SimpleData>
							<SimpleData name="GEAR">Box Core</SimpleData>
							<SimpleData name="GEAR2">Core</SimpleData>
							<SimpleData name="SEDIMENT.DEPTH.cm">15</SimpleData>
							<SimpleData name="AREA.m2"></SimpleData>
							<SimpleData name="ABUNDANCE.per.m2">124000000000000</SimpleData>
							<SimpleData name="DATA.TYPE.ABUNDANCE">Raw</SimpleData>
							<SimpleData name="CARBON.WT.mg.C.per.m2">2350</SimpleData>
							<SimpleData name="FINAL.UNIT.TYPE">organic C</SimpleData>
							<SimpleData name="CONVERSION.FACTOR.from.Rowe.1983">*1</SimpleData>
							<SimpleData name="FINAL.BIOMASS..mg.C.per.m2">2350</SimpleData>
							<SimpleData name="REFERENCE">Deming &amp; Carpenter 2008</SimpleData>
							<SimpleData name="PROVIDER">Jody W. Deming</SimpleData>
							<SimpleData name="BODY.OF.WATER">Gulf of Mexico</SimpleData>
							<SimpleData name="REGION">Gulf of Mexico</SimpleData>
							<SimpleData name="OCEAN.SEA">Gulf of Mexico</SimpleData>
							<SimpleData name="HABITAT">Continental Slope</SimpleData>
							<SimpleData name="COMMENTS"></SimpleData>
						</SchemaData>
					</ExtendedData>
					<Point>
						<coordinates>-91.47008,27.79823,0</coordinates>
					</Point>
				</Placemark>
				<Placemark>
					<styleUrl>#m_ylw-pushpin</styleUrl>
					<ExtendedData>
						<SchemaData schemaUrl="#data">
							<SimpleData name="CATEGORY">bacteria</SimpleData>
							<SimpleData name="STATION">C7</SimpleData>
							<SimpleData name="REPLICATION">2-C7-1</SimpleData>
							<SimpleData name="DEPTH.m">1057</SimpleData>
							<SimpleData name="DATE.UTC">6/16/2001</SimpleData>
							<SimpleData name="GEAR">Box Core</SimpleData>
							<SimpleData name="GEAR2">Core</SimpleData>
							<SimpleData name="SEDIMENT.DEPTH.cm">15</SimpleData>
							<SimpleData name="AREA.m2"></SimpleData>
							<SimpleData name="ABUNDANCE.per.m2">105000000000000</SimpleData>
							<SimpleData name="DATA.TYPE.ABUNDANCE">Raw</SimpleData>
							<SimpleData name="CARBON.WT.mg.C.per.m2">1850</SimpleData>
							<SimpleData name="FINAL.UNIT.TYPE">organic C</SimpleData>
							<SimpleData name="CONVERSION.FACTOR.from.Rowe.1983">*1</SimpleData>
							<SimpleData name="FINAL.BIOMASS..mg.C.per.m2">1850</SimpleData>
							<SimpleData name="REFERENCE">Deming &amp; Carpenter 2008</SimpleData>
							<SimpleData name="PROVIDER">Jody W. Deming</SimpleData>
							<SimpleData name="BODY.OF.WATER">Gulf of Mexico</SimpleData>
							<SimpleData name="REGION">Gulf of Mexico</SimpleData>
							<SimpleData name="OCEAN.SEA">Gulf of Mexico</SimpleData>
							<SimpleData name="HABITAT">Continental Slope</SimpleData>
							<SimpleData name="COMMENTS"></SimpleData>
						</SchemaData>
					</ExtendedData>
					<Point>
						<coordinates>-89.9812,27.73512,0</coordinates>
					</Point>
				</Placemark>
				<Placemark>
					<styleUrl>#m_ylw-pushpin</styleUrl>
					<ExtendedData>
						<SchemaData schemaUrl="#data">
							<SimpleData name="CATEGORY">bacteria</SimpleData>
							<SimpleData name="STATION">GKF</SimpleData>
							<SimpleData name="REPLICATION">2-GKF-1</SimpleData>
							<SimpleData name="DEPTH.m">2452</SimpleData>
							<SimpleData name="DATE.UTC">6/15/2001</SimpleData>
							<SimpleData name="GEAR">Box Core</SimpleData>
							<SimpleData name="GEAR2">Core</SimpleData>
							<SimpleData name="SEDIMENT.DEPTH.cm">15</SimpleData>
							<SimpleData name="AREA.m2"></SimpleData>
							<SimpleData name="ABUNDANCE.per.m2">83300000000000</SimpleData>
							<SimpleData name="DATA.TYPE.ABUNDANCE">Raw</SimpleData>
							<SimpleData name="CARBON.WT.mg.C.per.m2">1170</SimpleData>
							<SimpleData name="FINAL.UNIT.TYPE">organic C</SimpleData>
							<SimpleData name="CONVERSION.FACTOR.from.Rowe.1983">*1</SimpleData>
							<SimpleData name="FINAL.BIOMASS..mg.C.per.m2">1170</SimpleData>
							<SimpleData name="REFERENCE">Deming &amp; Carpenter 2008</SimpleData>
							<SimpleData name="PROVIDER">Jody W. Deming</SimpleData>
							<SimpleData name="BODY.OF.WATER">Gulf of Mexico</SimpleData>
							<SimpleData name="REGION">Gulf of Mexico</SimpleData>
							<SimpleData name="OCEAN.SEA">Gulf of Mexico</SimpleData>
							<SimpleData name="HABITAT">Continental Slope</SimpleData>
							<SimpleData name="COMMENTS"></SimpleData>
						</SchemaData>
					</ExtendedData>
					<Point>
						<coordinates>-90.21061999999999,26.92718,0</coordinates>
					</Point>
				</Placemark>
				<Placemark>
					<styleUrl>#m_ylw-pushpin</styleUrl>
					<ExtendedData>
						<SchemaData schemaUrl="#data">
							<SimpleData name="CATEGORY">bacteria</SimpleData>
							<SimpleData name="STATION">HiPro</SimpleData>
							<SimpleData name="REPLICATION">2-HiPro-1</SimpleData>
							<SimpleData name="DEPTH.m">1560</SimpleData>
							<SimpleData name="DATE.UTC">6/5/2001</SimpleData>
							<SimpleData name="GEAR">Box Core</SimpleData>
							<SimpleData name="GEAR2">Core</SimpleData>
							<SimpleData name="SEDIMENT.DEPTH.cm">15</SimpleData>
							<SimpleData name="AREA.m2"></SimpleData>
							<SimpleData name="ABUNDANCE.per.m2">81900000000000</SimpleData>
							<SimpleData name="DATA.TYPE.ABUNDANCE">Raw</SimpleData>
							<SimpleData name="CARBON.WT.mg.C.per.m2">1340</SimpleData>
							<SimpleData name="FINAL.UNIT.TYPE">organic C</SimpleData>
							<SimpleData name="CONVERSION.FACTOR.from.Rowe.1983">*1</SimpleData>
							<SimpleData name="FINAL.BIOMASS..mg.C.per.m2">1340</SimpleData>
							<SimpleData name="REFERENCE">Deming &amp; Carpenter 2008</SimpleData>
							<SimpleData name="PROVIDER">Jody W. Deming</SimpleData>
							<SimpleData name="BODY.OF.WATER">Gulf of Mexico</SimpleData>
							<SimpleData name="REGION">Gulf of Mexico</SimpleData>
							<SimpleData name="OCEAN.SEA">Gulf of Mexico</SimpleData>
							<SimpleData name="HABITAT">Continental Slope</SimpleData>
							<SimpleData name="COMMENTS"></SimpleData>
						</SchemaData>
					</ExtendedData>
					<Point>
						<coordinates>-88.57905,28.55159,0</coordinates>
					</Point>
				</Placemark>
				<Placemark>
					<styleUrl>#m_ylw-pushpin</styleUrl>
					<ExtendedData>
						<SchemaData schemaUrl="#data">
							<SimpleData name="CATEGORY">bacteria</SimpleData>
							<SimpleData name="STATION">MT1</SimpleData>
							<SimpleData name="REPLICATION">2-MT1-2</SimpleData>
							<SimpleData name="DEPTH.m">490</SimpleData>
							<SimpleData name="DATE.UTC">6/2/2001</SimpleData>
							<SimpleData name="GEAR">Box Core</SimpleData>
							<SimpleData name="GEAR2">Core</SimpleData>
							<SimpleData name="SEDIMENT.DEPTH.cm">15</SimpleData>
							<SimpleData name="AREA.m2"></SimpleData>
							<SimpleData name="ABUNDANCE.per.m2">142000000000000</SimpleData>
							<SimpleData name="DATA.TYPE.ABUNDANCE">Raw</SimpleData>
							<SimpleData name="CARBON.WT.mg.C.per.m2">2720</SimpleData>
							<SimpleData name="FINAL.UNIT.TYPE">organic C</SimpleData>
							<SimpleData name="CONVERSION.FACTOR.from.Rowe.1983">*1</SimpleData>
							<SimpleData name="FINAL.BIOMASS..mg.C.per.m2">2720</SimpleData>
							<SimpleData name="REFERENCE">Deming &amp; Carpenter 2008</SimpleData>
							<SimpleData name="PROVIDER">Jody W. Deming</SimpleData>
							<SimpleData name="BODY.OF.WATER">Gulf of Mexico</SimpleData>
							<SimpleData name="REGION">Gulf of Mexico</SimpleData>
							<SimpleData name="OCEAN.SEA">Gulf of Mexico</SimpleData>
							<SimpleData name="HABITAT">Continental Slope</SimpleData>
							<SimpleData name="COMMENTS"></SimpleData>
						</SchemaData>
					</ExtendedData>
					<Point>
						<coordinates>-89.82561,28.53517,0</coordinates>
					</Point>
				</Placemark>
				<Placemark>
					<styleUrl>#m_ylw-pushpin</styleUrl>
					<ExtendedData>
						<SchemaData schemaUrl="#data">
							<SimpleData name="CATEGORY">bacteria</SimpleData>
							<SimpleData name="STATION">MT3</SimpleData>
							<SimpleData name="REPLICATION">2-MT3-1</SimpleData>
							<SimpleData name="DEPTH.m">980</SimpleData>
							<SimpleData name="DATE.UTC">6/4/2001</SimpleData>
							<SimpleData name="GEAR">Box Core</SimpleData>
							<SimpleData name="GEAR2">Core</SimpleData>
							<SimpleData name="SEDIMENT.DEPTH.cm">15</SimpleData>
							<SimpleData name="AREA.m2"></SimpleData>
							<SimpleData name="ABUNDANCE.per.m2">121000000000000</SimpleData>
							<SimpleData name="DATA.TYPE.ABUNDANCE">Raw</SimpleData>
							<SimpleData name="CARBON.WT.mg.C.per.m2">2160</SimpleData>
							<SimpleData name="FINAL.UNIT.TYPE">organic C</SimpleData>
							<SimpleData name="CONVERSION.FACTOR.from.Rowe.1983">*1</SimpleData>
							<SimpleData name="FINAL.BIOMASS..mg.C.per.m2">2160</SimpleData>
							<SimpleData name="REFERENCE">Deming &amp; Carpenter 2008</SimpleData>
							<SimpleData name="PROVIDER">Jody W. Deming</SimpleData>
							<SimpleData name="BODY.OF.WATER">Gulf of Mexico</SimpleData>
							<SimpleData name="REGION">Gulf of Mexico</SimpleData>
							<SimpleData name="OCEAN.SEA">Gulf of Mexico</SimpleData>
							<SimpleData name="HABITAT">Continental Slope</SimpleData>
							<SimpleData name="COMMENTS"></SimpleData>
						</SchemaData>
					</ExtendedData>
					<Point>
						<coordinates>-89.51263,28.22455,0</coordinates>
					</Point>
				</Placemark>
				<Placemark>
					<styleUrl>#m_ylw-pushpin</styleUrl>
					<ExtendedData>
						<SchemaData schemaUrl="#data">
							<SimpleData name="CATEGORY">bacteria</SimpleData>
							<SimpleData name="STATION">MT6</SimpleData>
							<SimpleData name="REPLICATION">2-MT6-1</SimpleData>
							<SimpleData name="DEPTH.m">2740</SimpleData>
							<SimpleData name="DATE.UTC">6/13/2001</SimpleData>
							<SimpleData name="GEAR">Box Core</SimpleData>
							<SimpleData name="GEAR2">Core</SimpleData>
							<SimpleData name="SEDIMENT.DEPTH.cm">15</SimpleData>
							<SimpleData name="AREA.m2"></SimpleData>
							<SimpleData name="ABUNDANCE.per.m2">63600000000000</SimpleData>
							<SimpleData name="DATA.TYPE.ABUNDANCE">Raw</SimpleData>
							<SimpleData name="CARBON.WT.mg.C.per.m2">840</SimpleData>
							<SimpleData name="FINAL.UNIT.TYPE">organic C</SimpleData>
							<SimpleData name="CONVERSION.FACTOR.from.Rowe.1983">*1</SimpleData>
							<SimpleData name="FINAL.BIOMASS..mg.C.per.m2">840</SimpleData>
							<SimpleData name="REFERENCE">Deming &amp; Carpenter 2008</SimpleData>
							<SimpleData name="PROVIDER">Jody W. Deming</SimpleData>
							<SimpleData name="BODY.OF.WATER">Gulf of Mexico</SimpleData>
							<SimpleData name="REGION">Gulf of Mexico</SimpleData>
							<SimpleData name="OCEAN.SEA">Gulf of Mexico</SimpleData>
							<SimpleData name="HABITAT">Continental Slope</SimpleData>
							<SimpleData name="COMMENTS"></SimpleData>
						</SchemaData>
					</ExtendedData>
					<Point>
						<coordinates>-88.01399000000001,26.99068,0</coordinates>
					</Point>
				</Placemark>
				<Placemark>
					<styleUrl>#m_ylw-pushpin</styleUrl>
					<ExtendedData>
						<SchemaData schemaUrl="#data">
							<SimpleData name="CATEGORY">bacteria</SimpleData>
							<SimpleData name="STATION">S36</SimpleData>
							<SimpleData name="REPLICATION">2-S36-1</SimpleData>
							<SimpleData name="DEPTH.m">1849</SimpleData>
							<SimpleData name="DATE.UTC">6/10/2001</SimpleData>
							<SimpleData name="GEAR">Box Core</SimpleData>
							<SimpleData name="GEAR2">Core</SimpleData>
							<SimpleData name="SEDIMENT.DEPTH.cm">15</SimpleData>
							<SimpleData name="AREA.m2"></SimpleData>
							<SimpleData name="ABUNDANCE.per.m2">129000000000000</SimpleData>
							<SimpleData name="DATA.TYPE.ABUNDANCE">Raw</SimpleData>
							<SimpleData name="CARBON.WT.mg.C.per.m2">2020</SimpleData>
							<SimpleData name="FINAL.UNIT.TYPE">organic C</SimpleData>
							<SimpleData name="CONVERSION.FACTOR.from.Rowe.1983">*1</SimpleData>
							<SimpleData name="FINAL.BIOMASS..mg.C.per.m2">2020</SimpleData>
							<SimpleData name="REFERENCE">Deming &amp; Carpenter 2008</SimpleData>
							<SimpleData name="PROVIDER">Jody W. Deming</SimpleData>
							<SimpleData name="BODY.OF.WATER">Gulf of Mexico</SimpleData>
							<SimpleData name="REGION">Gulf of Mexico</SimpleData>
							<SimpleData name="OCEAN.SEA">Gulf of Mexico</SimpleData>
							<SimpleData name="HABITAT">Continental Slope</SimpleData>
							<SimpleData name="COMMENTS"></SimpleData>
						</SchemaData>
					</ExtendedData>
					<Point>
						<coordinates>-87.67948,28.91199,0</coordinates>
					</Point>
				</Placemark>
				<Placemark>
					<styleUrl>#m_ylw-pushpin</styleUrl>
					<ExtendedData>
						<SchemaData schemaUrl="#data">
							<SimpleData name="CATEGORY">bacteria</SimpleData>
							<SimpleData name="STATION">S41</SimpleData>
							<SimpleData name="REPLICATION">2-S41-2</SimpleData>
							<SimpleData name="DEPTH.m">2990</SimpleData>
							<SimpleData name="DATE.UTC">6/8/2001</SimpleData>
							<SimpleData name="GEAR">Box Core</SimpleData>
							<SimpleData name="GEAR2">Core</SimpleData>
							<SimpleData name="SEDIMENT.DEPTH.cm">15</SimpleData>
							<SimpleData name="AREA.m2"></SimpleData>
							<SimpleData name="ABUNDANCE.per.m2">81800000000000</SimpleData>
							<SimpleData name="DATA.TYPE.ABUNDANCE">Raw</SimpleData>
							<SimpleData name="CARBON.WT.mg.C.per.m2">1030</SimpleData>
							<SimpleData name="FINAL.UNIT.TYPE">organic C</SimpleData>
							<SimpleData name="CONVERSION.FACTOR.from.Rowe.1983">*1</SimpleData>
							<SimpleData name="FINAL.BIOMASS..mg.C.per.m2">1030</SimpleData>
							<SimpleData name="REFERENCE">Deming &amp; Carpenter 2008</SimpleData>
							<SimpleData name="PROVIDER">Jody W. Deming</SimpleData>
							<SimpleData name="BODY.OF.WATER">Gulf of Mexico</SimpleData>
							<SimpleData name="REGION">Gulf of Mexico</SimpleData>
							<SimpleData name="OCEAN.SEA">Gulf of Mexico</SimpleData>
							<SimpleData name="HABITAT">Continental Slope</SimpleData>
							<SimpleData name="COMMENTS"></SimpleData>
						</SchemaData>
					</ExtendedData>
					<Point>
						<coordinates>-86.58221,27.96061,0</coordinates>
					</Point>
				</Placemark>
				<Placemark>
					<styleUrl>#m_ylw-pushpin</styleUrl>
					<ExtendedData>
						<SchemaData schemaUrl="#data">
							<SimpleData name="CATEGORY">bacteria</SimpleData>
							<SimpleData name="STATION">S42</SimpleData>
							<SimpleData name="REPLICATION">2-S42-2</SimpleData>
							<SimpleData name="DEPTH.m">773</SimpleData>
							<SimpleData name="DATE.UTC">6/7/2001</SimpleData>
							<SimpleData name="GEAR">Box Core</SimpleData>
							<SimpleData name="GEAR2">Core</SimpleData>
							<SimpleData name="SEDIMENT.DEPTH.cm">15</SimpleData>
							<SimpleData name="AREA.m2"></SimpleData>
							<SimpleData name="ABUNDANCE.per.m2">119000000000000</SimpleData>
							<SimpleData name="DATA.TYPE.ABUNDANCE">Raw</SimpleData>
							<SimpleData name="CARBON.WT.mg.C.per.m2">2190</SimpleData>
							<SimpleData name="FINAL.UNIT.TYPE">organic C</SimpleData>
							<SimpleData name="CONVERSION.FACTOR.from.Rowe.1983">*1</SimpleData>
							<SimpleData name="FINAL.BIOMASS..mg.C.per.m2">2190</SimpleData>
							<SimpleData name="REFERENCE">Deming &amp; Carpenter 2008</SimpleData>
							<SimpleData name="PROVIDER">Jody W. Deming</SimpleData>
							<SimpleData name="BODY.OF.WATER">Gulf of Mexico</SimpleData>
							<SimpleData name="REGION">Gulf of Mexico</SimpleData>
							<SimpleData name="OCEAN.SEA">Gulf of Mexico</SimpleData>
							<SimpleData name="HABITAT">Continental Slope</SimpleData>
							<SimpleData name="COMMENTS"></SimpleData>
						</SchemaData>
					</ExtendedData>
					<Point>
						<coordinates>-86.42885,28.25446,0</coordinates>
					</Point>
				</Placemark>
				<Placemark>
					<styleUrl>#m_ylw-pushpin</styleUrl>
					<ExtendedData>
						<SchemaData schemaUrl="#data">
							<SimpleData name="CATEGORY">bacteria</SimpleData>
							<SimpleData name="STATION">S1</SimpleData>
							<SimpleData name="REPLICATION">3A-S1-1</SimpleData>
							<SimpleData name="DEPTH.m">3535</SimpleData>
							<SimpleData name="DATE.UTC">6/3/2002</SimpleData>
							<SimpleData name="GEAR">Box Core</SimpleData>
							<SimpleData name="GEAR2">Core</SimpleData>
							<SimpleData name="SEDIMENT.DEPTH.cm">15</SimpleData>
							<SimpleData name="AREA.m2"></SimpleData>
							<SimpleData name="ABUNDANCE.per.m2">140000000000000</SimpleData>
							<SimpleData name="DATA.TYPE.ABUNDANCE">Raw</SimpleData>
							<SimpleData name="CARBON.WT.mg.C.per.m2">1570</SimpleData>
							<SimpleData name="FINAL.UNIT.TYPE">organic C</SimpleData>
							<SimpleData name="CONVERSION.FACTOR.from.Rowe.1983">*1</SimpleData>
							<SimpleData name="FINAL.BIOMASS..mg.C.per.m2">1570</SimpleData>
							<SimpleData name="REFERENCE">Deming &amp; Carpenter 2008</SimpleData>
							<SimpleData name="PROVIDER">Jody W. Deming</SimpleData>
							<SimpleData name="BODY.OF.WATER">Gulf of Mexico</SimpleData>
							<SimpleData name="REGION">Gulf of Mexico</SimpleData>
							<SimpleData name="OCEAN.SEA">Gulf of Mexico</SimpleData>
							<SimpleData name="HABITAT">Continental Slope</SimpleData>
							<SimpleData name="COMMENTS"></SimpleData>
						</SchemaData>
					</ExtendedData>
					<Point>
						<coordinates>-91.99943000000002,25.00701,0</coordinates>
					</Point>
				</Placemark>
				<Placemark>
					<styleUrl>#m_ylw-pushpin</styleUrl>
					<ExtendedData>
						<SchemaData schemaUrl="#data">
							<SimpleData name="CATEGORY">bacteria</SimpleData>
							<SimpleData name="STATION">S2</SimpleData>
							<SimpleData name="REPLICATION">3A-S2-13</SimpleData>
							<SimpleData name="DEPTH.m">3732</SimpleData>
							<SimpleData name="DATE.UTC">6/5/2002</SimpleData>
							<SimpleData name="GEAR">Box Core</SimpleData>
							<SimpleData name="GEAR2">Core</SimpleData>
							<SimpleData name="SEDIMENT.DEPTH.cm">15</SimpleData>
							<SimpleData name="AREA.m2"></SimpleData>
							<SimpleData name="ABUNDANCE.per.m2">145000000000000</SimpleData>
							<SimpleData name="DATA.TYPE.ABUNDANCE">Raw</SimpleData>
							<SimpleData name="CARBON.WT.mg.C.per.m2">1560</SimpleData>
							<SimpleData name="FINAL.UNIT.TYPE">organic C</SimpleData>
							<SimpleData name="CONVERSION.FACTOR.from.Rowe.1983">*1</SimpleData>
							<SimpleData name="FINAL.BIOMASS..mg.C.per.m2">1560</SimpleData>
							<SimpleData name="REFERENCE">Deming &amp; Carpenter 2008</SimpleData>
							<SimpleData name="PROVIDER">Jody W. Deming</SimpleData>
							<SimpleData name="BODY.OF.WATER">Gulf of Mexico</SimpleData>
							<SimpleData name="REGION">Gulf of Mexico</SimpleData>
							<SimpleData name="OCEAN.SEA">Gulf of Mexico</SimpleData>
							<SimpleData name="HABITAT">Continental Slope</SimpleData>
							<SimpleData name="COMMENTS"></SimpleData>
						</SchemaData>
					</ExtendedData>
					<Point>
						<coordinates>-92.0034,23.5015,0</coordinates>
					</Point>
				</Placemark>
				<Placemark>
					<styleUrl>#m_ylw-pushpin</styleUrl>
					<ExtendedData>
						<SchemaData schemaUrl="#data">
							<SimpleData name="CATEGORY">bacteria</SimpleData>
							<SimpleData name="STATION">S4</SimpleData>
							<SimpleData name="REPLICATION">3A-S4-23</SimpleData>
							<SimpleData name="DEPTH.m">3400</SimpleData>
							<SimpleData name="DATE.UTC">6/10/2002</SimpleData>
							<SimpleData name="GEAR">Box Core</SimpleData>
							<SimpleData name="GEAR2">Core</SimpleData>
							<SimpleData name="SEDIMENT.DEPTH.cm">15</SimpleData>
							<SimpleData name="AREA.m2"></SimpleData>
							<SimpleData name="ABUNDANCE.per.m2">148000000000000</SimpleData>
							<SimpleData name="DATA.TYPE.ABUNDANCE">Raw</SimpleData>
							<SimpleData name="CARBON.WT.mg.C.per.m2">1720</SimpleData>
							<SimpleData name="FINAL.UNIT.TYPE">organic C</SimpleData>
							<SimpleData name="CONVERSION.FACTOR.from.Rowe.1983">*1</SimpleData>
							<SimpleData name="FINAL.BIOMASS..mg.C.per.m2">1720</SimpleData>
							<SimpleData name="REFERENCE">Deming &amp; Carpenter 2008</SimpleData>
							<SimpleData name="PROVIDER">Jody W. Deming</SimpleData>
							<SimpleData name="BODY.OF.WATER">Gulf of Mexico</SimpleData>
							<SimpleData name="REGION">Gulf of Mexico</SimpleData>
							<SimpleData name="OCEAN.SEA">Gulf of Mexico</SimpleData>
							<SimpleData name="HABITAT">Continental Slope</SimpleData>
							<SimpleData name="COMMENTS"></SimpleData>
						</SchemaData>
					</ExtendedData>
					<Point>
						<coordinates>-85.47121,24.24452000000001,0</coordinates>
					</Point>
				</Placemark>
				<Placemark>
					<styleUrl>#m_ylw-pushpin</styleUrl>
					<ExtendedData>
						<SchemaData schemaUrl="#data">
							<SimpleData name="CATEGORY">bacteria</SimpleData>
							<SimpleData name="STATION">S5</SimpleData>
							<SimpleData name="REPLICATION">3A-S5-37</SimpleData>
							<SimpleData name="DEPTH.m">3316</SimpleData>
							<SimpleData name="DATE.UTC">6/13/2002</SimpleData>
							<SimpleData name="GEAR">Box Core</SimpleData>
							<SimpleData name="GEAR2">Core</SimpleData>
							<SimpleData name="SEDIMENT.DEPTH.cm">15</SimpleData>
							<SimpleData name="AREA.m2"></SimpleData>
							<SimpleData name="ABUNDANCE.per.m2">175000000000000</SimpleData>
							<SimpleData name="DATA.TYPE.ABUNDANCE">Raw</SimpleData>
							<SimpleData name="CARBON.WT.mg.C.per.m2">2070</SimpleData>
							<SimpleData name="FINAL.UNIT.TYPE">organic C</SimpleData>
							<SimpleData name="CONVERSION.FACTOR.from.Rowe.1983">*1</SimpleData>
							<SimpleData name="FINAL.BIOMASS..mg.C.per.m2">2070</SimpleData>
							<SimpleData name="REFERENCE">Deming &amp; Carpenter 2008</SimpleData>
							<SimpleData name="PROVIDER">Jody W. Deming</SimpleData>
							<SimpleData name="BODY.OF.WATER">Gulf of Mexico</SimpleData>
							<SimpleData name="REGION">Gulf of Mexico</SimpleData>
							<SimpleData name="OCEAN.SEA">Gulf of Mexico</SimpleData>
							<SimpleData name="HABITAT">Continental Slope</SimpleData>
							<SimpleData name="COMMENTS"></SimpleData>
						</SchemaData>
					</ExtendedData>
					<Point>
						<coordinates>-88.27076,25.49219,0</coordinates>
					</Point>
				</Placemark>
				<Placemark>
					<styleUrl>#m_ylw-pushpin</styleUrl>
					<ExtendedData>
						<SchemaData schemaUrl="#data">
							<SimpleData name="CATEGORY">bacteria</SimpleData>
							<SimpleData name="STATION">S3</SimpleData>
							<SimpleData name="REPLICATION">3B-S3-5</SimpleData>
							<SimpleData name="DEPTH.m">3675</SimpleData>
							<SimpleData name="DATE.UTC">8/6/2002</SimpleData>
							<SimpleData name="GEAR">Box Core</SimpleData>
							<SimpleData name="GEAR2">Core</SimpleData>
							<SimpleData name="SEDIMENT.DEPTH.cm">15</SimpleData>
							<SimpleData name="AREA.m2"></SimpleData>
							<SimpleData name="ABUNDANCE.per.m2">130000000000000</SimpleData>
							<SimpleData name="DATA.TYPE.ABUNDANCE">Raw</SimpleData>
							<SimpleData name="CARBON.WT.mg.C.per.m2">1410</SimpleData>
							<SimpleData name="FINAL.UNIT.TYPE">organic C</SimpleData>
							<SimpleData name="CONVERSION.FACTOR.from.Rowe.1983">*1</SimpleData>
							<SimpleData name="FINAL.BIOMASS..mg.C.per.m2">1410</SimpleData>
							<SimpleData name="REFERENCE">Deming &amp; Carpenter 2008</SimpleData>
							<SimpleData name="PROVIDER">Jody W. Deming</SimpleData>
							<SimpleData name="BODY.OF.WATER">Gulf of Mexico</SimpleData>
							<SimpleData name="REGION">Gulf of Mexico</SimpleData>
							<SimpleData name="OCEAN.SEA">Gulf of Mexico</SimpleData>
							<SimpleData name="HABITAT">Continental Slope</SimpleData>
							<SimpleData name="COMMENTS"></SimpleData>
						</SchemaData>
					</ExtendedData>
					<Point>
						<coordinates>-90.75785999999999,24.75304,0</coordinates>
					</Point>
				</Placemark>
				<Placemark>
					<styleUrl>#m_ylw-pushpin</styleUrl>
					<ExtendedData>
						<SchemaData schemaUrl="#data">
							<SimpleData name="CATEGORY">bacteria</SimpleData>
							<SimpleData name="STATION">SAST</SimpleData>
							<SimpleData name="REPLICATION"></SimpleData>
							<SimpleData name="DEPTH.m">4420</SimpleData>
							<SimpleData name="DATE.UTC">Sep/Oct 95</SimpleData>
							<SimpleData name="GEAR">Multicorer</SimpleData>
							<SimpleData name="GEAR2">Core</SimpleData>
							<SimpleData name="SEDIMENT.DEPTH.cm">5</SimpleData>
							<SimpleData name="AREA.m2">0.13-0.57</SimpleData>
							<SimpleData name="ABUNDANCE.per.m2">30303000000000</SimpleData>
							<SimpleData name="DATA.TYPE.ABUNDANCE">Raw</SimpleData>
							<SimpleData name="CARBON.WT.mg.C.per.m2">300</SimpleData>
							<SimpleData name="FINAL.UNIT.TYPE">organic C</SimpleData>
							<SimpleData name="CONVERSION.FACTOR.from.Rowe.1983">*1</SimpleData>
							<SimpleData name="FINAL.BIOMASS..mg.C.per.m2">300</SimpleData>
							<SimpleData name="REFERENCE">Boetius et al 2000</SimpleData>
							<SimpleData name="PROVIDER">Gilbert T. Rowe</SimpleData>
							<SimpleData name="BODY.OF.WATER">Arabian Sea</SimpleData>
							<SimpleData name="REGION">Arabian Sea</SimpleData>
							<SimpleData name="OCEAN.SEA">Arabian Sea</SimpleData>
							<SimpleData name="HABITAT">Continental Slope</SimpleData>
							<SimpleData name="COMMENTS">Cell volume = 0.033 um3, CF = 3E-13 g C um-3</SimpleData>
						</SchemaData>
					</ExtendedData>
					<Point>
						<coordinates>65,10.03333333,0</coordinates>
					</Point>
				</Placemark>
				<Placemark>
					<styleUrl>#m_ylw-pushpin</styleUrl>
					<ExtendedData>
						<SchemaData schemaUrl="#data">
							<SimpleData name="CATEGORY">bacteria</SimpleData>
							<SimpleData name="STATION">SAST</SimpleData>
							<SimpleData name="REPLICATION"></SimpleData>
							<SimpleData name="DEPTH.m">4420</SimpleData>
							<SimpleData name="DATE.UTC">Apr/May 97</SimpleData>
							<SimpleData name="GEAR">Multicorer</SimpleData>
							<SimpleData name="GEAR2">Core</SimpleData>
							<SimpleData name="SEDIMENT.DEPTH.cm">5</SimpleData>
							<SimpleData name="AREA.m2">0.13-0.57</SimpleData>
							<SimpleData name="ABUNDANCE.per.m2">60606100000000</SimpleData>
							<SimpleData name="DATA.TYPE.ABUNDANCE">Raw</SimpleData>
							<SimpleData name="CARBON.WT.mg.C.per.m2">600</SimpleData>
							<SimpleData name="FINAL.UNIT.TYPE">organic C</SimpleData>
							<SimpleData name="CONVERSION.FACTOR.from.Rowe.1983">*1</SimpleData>
							<SimpleData name="FINAL.BIOMASS..mg.C.per.m2">600</SimpleData>
							<SimpleData name="REFERENCE">Boetius et al 2000</SimpleData>
							<SimpleData name="PROVIDER">Gilbert T. Rowe</SimpleData>
							<SimpleData name="BODY.OF.WATER">Arabian Sea</SimpleData>
							<SimpleData name="REGION">Arabian Sea</SimpleData>
							<SimpleData name="OCEAN.SEA">Arabian Sea</SimpleData>
							<SimpleData name="HABITAT">Continental Slope</SimpleData>
							<SimpleData name="COMMENTS">Cell volume = 0.033 um3, CF = 3E-13 g C um-3</SimpleData>
						</SchemaData>
					</ExtendedData>
					<Point>
						<coordinates>65,10.03333333,0</coordinates>
					</Point>
				</Placemark>
				<Placemark>
					<styleUrl>#m_ylw-pushpin</styleUrl>
					<ExtendedData>
						<SchemaData schemaUrl="#data">
							<SimpleData name="CATEGORY">bacteria</SimpleData>
							<SimpleData name="STATION">SAST</SimpleData>
							<SimpleData name="REPLICATION"></SimpleData>
							<SimpleData name="DEPTH.m">4420</SimpleData>
							<SimpleData name="DATE.UTC">Feb/Mar 98</SimpleData>
							<SimpleData name="GEAR">Multicorer</SimpleData>
							<SimpleData name="GEAR2">Core</SimpleData>
							<SimpleData name="SEDIMENT.DEPTH.cm">5</SimpleData>
							<SimpleData name="AREA.m2">0.13-0.57</SimpleData>
							<SimpleData name="ABUNDANCE.per.m2">20202000000000</SimpleData>
							<SimpleData name="DATA.TYPE.ABUNDANCE">Raw</SimpleData>
							<SimpleData name="CARBON.WT.mg.C.per.m2">200</SimpleData>
							<SimpleData name="FINAL.UNIT.TYPE">organic C</SimpleData>
							<SimpleData name="CONVERSION.FACTOR.from.Rowe.1983">*1</SimpleData>
							<SimpleData name="FINAL.BIOMASS..mg.C.per.m2">200</SimpleData>
							<SimpleData name="REFERENCE">Boetius et al 2000</SimpleData>
							<SimpleData name="PROVIDER">Gilbert T. Rowe</SimpleData>
							<SimpleData name="BODY.OF.WATER">Arabian Sea</SimpleData>
							<SimpleData name="REGION">Arabian Sea</SimpleData>
							<SimpleData name="OCEAN.SEA">Arabian Sea</SimpleData>
							<SimpleData name="HABITAT">Continental Slope</SimpleData>
							<SimpleData name="COMMENTS">Cell volume = 0.033 um3, CF = 3E-13 g C um-3</SimpleData>
						</SchemaData>
					</ExtendedData>
					<Point>
						<coordinates>65,10.03333333,0</coordinates>
					</Point>
				</Placemark>
				<Placemark>
					<styleUrl>#m_ylw-pushpin</styleUrl>
					<ExtendedData>
						<SchemaData schemaUrl="#data">
							<SimpleData name="CATEGORY">bacteria</SimpleData>
							<SimpleData name="STATION">CAST</SimpleData>
							<SimpleData name="REPLICATION"></SimpleData>
							<SimpleData name="DEPTH.m">3950</SimpleData>
							<SimpleData name="DATE.UTC">Sep/Oct 95</SimpleData>
							<SimpleData name="GEAR">Multicorer</SimpleData>
							<SimpleData name="GEAR2">Core</SimpleData>
							<SimpleData name="SEDIMENT.DEPTH.cm">5</SimpleData>
							<SimpleData name="AREA.m2">0.13-0.57</SimpleData>
							<SimpleData name="ABUNDANCE.per.m2">50505100000000</SimpleData>
							<SimpleData name="DATA.TYPE.ABUNDANCE">Raw</SimpleData>
							<SimpleData name="CARBON.WT.mg.C.per.m2">500</SimpleData>
							<SimpleData name="FINAL.UNIT.TYPE">organic C</SimpleData>
							<SimpleData name="CONVERSION.FACTOR.from.Rowe.1983">*1</SimpleData>
							<SimpleData name="FINAL.BIOMASS..mg.C.per.m2">500</SimpleData>
							<SimpleData name="REFERENCE">Boetius et al 2000</SimpleData>
							<SimpleData name="PROVIDER">Gilbert T. Rowe</SimpleData>
							<SimpleData name="BODY.OF.WATER">Arabian Sea</SimpleData>
							<SimpleData name="REGION">Arabian Sea</SimpleData>
							<SimpleData name="OCEAN.SEA">Arabian Sea</SimpleData>
							<SimpleData name="HABITAT">Continental Slope</SimpleData>
							<SimpleData name="COMMENTS">Cell volume = 0.033 um3, CF = 3E-13 g C um-3</SimpleData>
						</SchemaData>
					</ExtendedData>
					<Point>
						<coordinates>64.56666667,14.41666667,0</coordinates>
					</Point>
				</Placemark>
				<Placemark>
					<styleUrl>#m_ylw-pushpin</styleUrl>
					<ExtendedData>
						<SchemaData schemaUrl="#data">
							<SimpleData name="CATEGORY">bacteria</SimpleData>
							<SimpleData name="STATION">CAST</SimpleData>
							<SimpleData name="REPLICATION"></SimpleData>
							<SimpleData name="DEPTH.m">3950</SimpleData>
							<SimpleData name="DATE.UTC">Apr/May 97</SimpleData>
							<SimpleData name="GEAR">Multicorer</SimpleData>
							<SimpleData name="GEAR2">Core</SimpleData>
							<SimpleData name="SEDIMENT.DEPTH.cm">5</SimpleData>
							<SimpleData name="AREA.m2">0.13-0.57</SimpleData>
							<SimpleData name="ABUNDANCE.per.m2">90909100000000</SimpleData>
							<SimpleData name="DATA.TYPE.ABUNDANCE">Raw</SimpleData>
							<SimpleData name="CARBON.WT.mg.C.per.m2">900</SimpleData>
							<SimpleData name="FINAL.UNIT.TYPE">organic C</SimpleData>
							<SimpleData name="CONVERSION.FACTOR.from.Rowe.1983">*1</SimpleData>
							<SimpleData name="FINAL.BIOMASS..mg.C.per.m2">900</SimpleData>
							<SimpleData name="REFERENCE">Boetius et al 2000</SimpleData>
							<SimpleData name="PROVIDER">Gilbert T. Rowe</SimpleData>
							<SimpleData name="BODY.OF.WATER">Arabian Sea</SimpleData>
							<SimpleData name="REGION">Arabian Sea</SimpleData>
							<SimpleData name="OCEAN.SEA">Arabian Sea</SimpleData>
							<SimpleData name="HABITAT">Continental Slope</SimpleData>
							<SimpleData name="COMMENTS">Cell volume = 0.033 um3, CF = 3E-13 g C um-3</SimpleData>
						</SchemaData>
					</ExtendedData>
					<Point>
						<coordinates>64.56666667,14.41666667,0</coordinates>
					</Point>
				</Placemark>
				<Placemark>
					<styleUrl>#m_ylw-pushpin</styleUrl>
					<ExtendedData>
						<SchemaData schemaUrl="#data">
							<SimpleData name="CATEGORY">bacteria</SimpleData>
							<SimpleData name="STATION">CAST</SimpleData>
							<SimpleData name="REPLICATION"></SimpleData>
							<SimpleData name="DEPTH.m">3950</SimpleData>
							<SimpleData name="DATE.UTC">Feb/Mar 98</SimpleData>
							<SimpleData name="GEAR">Multicorer</SimpleData>
							<SimpleData name="GEAR2">Core</SimpleData>
							<SimpleData name="SEDIMENT.DEPTH.cm">5</SimpleData>
							<SimpleData name="AREA.m2">0.13-0.57</SimpleData>
							<SimpleData name="ABUNDANCE.per.m2">50505100000000</SimpleData>
							<SimpleData name="DATA.TYPE.ABUNDANCE">Raw</SimpleData>
							<SimpleData name="CARBON.WT.mg.C.per.m2">500</SimpleData>
							<SimpleData name="FINAL.UNIT.TYPE">organic C</SimpleData>
							<SimpleData name="CONVERSION.FACTOR.from.Rowe.1983">*1</SimpleData>
							<SimpleData name="FINAL.BIOMASS..mg.C.per.m2">500</SimpleData>
							<SimpleData name="REFERENCE">Boetius et al 2000</SimpleData>
							<SimpleData name="PROVIDER">Gilbert T. Rowe</SimpleData>
							<SimpleData name="BODY.OF.WATER">Arabian Sea</SimpleData>
							<SimpleData name="REGION">Arabian Sea</SimpleData>
							<SimpleData name="OCEAN.SEA">Arabian Sea</SimpleData>
							<SimpleData name="HABITAT">Continental Slope</SimpleData>
							<SimpleData name="COMMENTS">Cell volume = 0.033 um3, CF = 3E-13 g C um-3</SimpleData>
						</SchemaData>
					</ExtendedData>
					<Point>
						<coordinates>64.56666667,14.41666667,0</coordinates>
					</Point>
				</Placemark>
				<Placemark>
					<styleUrl>#m_ylw-pushpin</styleUrl>
					<ExtendedData>
						<SchemaData schemaUrl="#data">
							<SimpleData name="CATEGORY">bacteria</SimpleData>
							<SimpleData name="STATION">EAST</SimpleData>
							<SimpleData name="REPLICATION"></SimpleData>
							<SimpleData name="DEPTH.m">3850</SimpleData>
							<SimpleData name="DATE.UTC">Feb/Mar 98</SimpleData>
							<SimpleData name="GEAR">Multicorer</SimpleData>
							<SimpleData name="GEAR2">Core</SimpleData>
							<SimpleData name="SEDIMENT.DEPTH.cm">5</SimpleData>
							<SimpleData name="AREA.m2">0.13-0.57</SimpleData>
							<SimpleData name="ABUNDANCE.per.m2">40404000000000</SimpleData>
							<SimpleData name="DATA.TYPE.ABUNDANCE">Raw</SimpleData>
							<SimpleData name="CARBON.WT.mg.C.per.m2">400</SimpleData>
							<SimpleData name="FINAL.UNIT.TYPE">organic C</SimpleData>
							<SimpleData name="CONVERSION.FACTOR.from.Rowe.1983">*1</SimpleData>
							<SimpleData name="FINAL.BIOMASS..mg.C.per.m2">400</SimpleData>
							<SimpleData name="REFERENCE">Boetius et al 2000</SimpleData>
							<SimpleData name="PROVIDER">Gilbert T. Rowe</SimpleData>
							<SimpleData name="BODY.OF.WATER">Arabian Sea</SimpleData>
							<SimpleData name="REGION">Arabian Sea</SimpleData>
							<SimpleData name="OCEAN.SEA">Arabian Sea</SimpleData>
							<SimpleData name="HABITAT">Continental Slope</SimpleData>
							<SimpleData name="COMMENTS">Cell volume = 0.033 um3, CF = 3E-13 g C um-3</SimpleData>
						</SchemaData>
					</ExtendedData>
					<Point>
						<coordinates>68.56666667,15.58333333,0</coordinates>
					</Point>
				</Placemark>
				<Placemark>
					<styleUrl>#m_ylw-pushpin</styleUrl>
					<ExtendedData>
						<SchemaData schemaUrl="#data">
							<SimpleData name="CATEGORY">bacteria</SimpleData>
							<SimpleData name="STATION">NAST</SimpleData>
							<SimpleData name="REPLICATION"></SimpleData>
							<SimpleData name="DEPTH.m">3190</SimpleData>
							<SimpleData name="DATE.UTC">Sep/Oct 95</SimpleData>
							<SimpleData name="GEAR">Multicorer</SimpleData>
							<SimpleData name="GEAR2">Core</SimpleData>
							<SimpleData name="SEDIMENT.DEPTH.cm">5</SimpleData>
							<SimpleData name="AREA.m2">0.13-0.57</SimpleData>
							<SimpleData name="ABUNDANCE.per.m2">141414000000000</SimpleData>
							<SimpleData name="DATA.TYPE.ABUNDANCE">Raw</SimpleData>
							<SimpleData name="CARBON.WT.mg.C.per.m2">1400</SimpleData>
							<SimpleData name="FINAL.UNIT.TYPE">organic C</SimpleData>
							<SimpleData name="CONVERSION.FACTOR.from.Rowe.1983">*1</SimpleData>
							<SimpleData name="FINAL.BIOMASS..mg.C.per.m2">1400</SimpleData>
							<SimpleData name="REFERENCE">Boetius et al 2000</SimpleData>
							<SimpleData name="PROVIDER">Gilbert T. Rowe</SimpleData>
							<SimpleData name="BODY.OF.WATER">Arabian Sea</SimpleData>
							<SimpleData name="REGION">Arabian Sea</SimpleData>
							<SimpleData name="OCEAN.SEA">Arabian Sea</SimpleData>
							<SimpleData name="HABITAT">Continental Slope</SimpleData>
							<SimpleData name="COMMENTS">Cell volume = 0.033 um3, CF = 3E-13 g C um-3</SimpleData>
						</SchemaData>
					</ExtendedData>
					<Point>
						<coordinates>65.58333333,20,0</coordinates>
					</Point>
				</Placemark>
				<Placemark>
					<styleUrl>#m_ylw-pushpin</styleUrl>
					<ExtendedData>
						<SchemaData schemaUrl="#data">
							<SimpleData name="CATEGORY">bacteria</SimpleData>
							<SimpleData name="STATION">NAST</SimpleData>
							<SimpleData name="REPLICATION"></SimpleData>
							<SimpleData name="DEPTH.m">3190</SimpleData>
							<SimpleData name="DATE.UTC">Apr/May 97</SimpleData>
							<SimpleData name="GEAR">Multicorer</SimpleData>
							<SimpleData name="GEAR2">Core</SimpleData>
							<SimpleData name="SEDIMENT.DEPTH.cm">5</SimpleData>
							<SimpleData name="AREA.m2">0.13-0.57</SimpleData>
							<SimpleData name="ABUNDANCE.per.m2">60606100000000</SimpleData>
							<SimpleData name="DATA.TYPE.ABUNDANCE">Raw</SimpleData>
							<SimpleData name="CARBON.WT.mg.C.per.m2">600</SimpleData>
							<SimpleData name="FINAL.UNIT.TYPE">organic C</SimpleData>
							<SimpleData name="CONVERSION.FACTOR.from.Rowe.1983">*1</SimpleData>
							<SimpleData name="FINAL.BIOMASS..mg.C.per.m2">600</SimpleData>
							<SimpleData name="REFERENCE">Boetius et al 2000</SimpleData>
							<SimpleData name="PROVIDER">Gilbert T. Rowe</SimpleData>
							<SimpleData name="BODY.OF.WATER">Arabian Sea</SimpleData>
							<SimpleData name="REGION">Arabian Sea</SimpleData>
							<SimpleData name="OCEAN.SEA">Arabian Sea</SimpleData>
							<SimpleData name="HABITAT">Continental Slope</SimpleData>
							<SimpleData name="COMMENTS">Cell volume = 0.033 um3, CF = 3E-13 g C um-3</SimpleData>
						</SchemaData>
					</ExtendedData>
					<Point>
						<coordinates>65.58333333,20,0</coordinates>
					</Point>
				</Placemark>
				<Placemark>
					<styleUrl>#m_ylw-pushpin</styleUrl>
					<ExtendedData>
						<SchemaData schemaUrl="#data">
							<SimpleData name="CATEGORY">bacteria</SimpleData>
							<SimpleData name="STATION">NAST</SimpleData>
							<SimpleData name="REPLICATION"></SimpleData>
							<SimpleData name="DEPTH.m">3190</SimpleData>
							<SimpleData name="DATE.UTC">Feb/Mar 98</SimpleData>
							<SimpleData name="GEAR">Multicorer</SimpleData>
							<SimpleData name="GEAR2">Core</SimpleData>
							<SimpleData name="SEDIMENT.DEPTH.cm">5</SimpleData>
							<SimpleData name="AREA.m2">0.13-0.57</SimpleData>
							<SimpleData name="ABUNDANCE.per.m2">101010000000000</SimpleData>
							<SimpleData name="DATA.TYPE.ABUNDANCE">Raw</SimpleData>
							<SimpleData name="CARBON.WT.mg.C.per.m2">1000</SimpleData>
							<SimpleData name="FINAL.UNIT.TYPE">organic C</SimpleData>
							<SimpleData name="CONVERSION.FACTOR.from.Rowe.1983">*1</SimpleData>
							<SimpleData name="FINAL.BIOMASS..mg.C.per.m2">1000</SimpleData>
							<SimpleData name="REFERENCE">Boetius et al 2000</SimpleData>
							<SimpleData name="PROVIDER">Gilbert T. Rowe</SimpleData>
							<SimpleData name="BODY.OF.WATER">Arabian Sea</SimpleData>
							<SimpleData name="REGION">Arabian Sea</SimpleData>
							<SimpleData name="OCEAN.SEA">Arabian Sea</SimpleData>
							<SimpleData name="HABITAT">Continental Slope</SimpleData>
							<SimpleData name="COMMENTS">Cell volume = 0.033 um3, CF = 3E-13 g C um-3</SimpleData>
						</SchemaData>
					</ExtendedData>
					<Point>
						<coordinates>65.58333333,20,0</coordinates>
					</Point>
				</Placemark>
				<Placemark>
					<styleUrl>#m_ylw-pushpin</styleUrl>
					<ExtendedData>
						<SchemaData schemaUrl="#data">
							<SimpleData name="CATEGORY">bacteria</SimpleData>
							<SimpleData name="STATION">WAST</SimpleData>
							<SimpleData name="REPLICATION"></SimpleData>
							<SimpleData name="DEPTH.m">4050</SimpleData>
							<SimpleData name="DATE.UTC">3/1/1995</SimpleData>
							<SimpleData name="GEAR">Multicorer</SimpleData>
							<SimpleData name="GEAR2">Core</SimpleData>
							<SimpleData name="SEDIMENT.DEPTH.cm">5</SimpleData>
							<SimpleData name="AREA.m2">0.13-0.57</SimpleData>
							<SimpleData name="ABUNDANCE.per.m2">50505100000000</SimpleData>
							<SimpleData name="DATA.TYPE.ABUNDANCE">Raw</SimpleData>
							<SimpleData name="CARBON.WT.mg.C.per.m2">500</SimpleData>
							<SimpleData name="FINAL.UNIT.TYPE">organic C</SimpleData>
							<SimpleData name="CONVERSION.FACTOR.from.Rowe.1983">*1</SimpleData>
							<SimpleData name="FINAL.BIOMASS..mg.C.per.m2">500</SimpleData>
							<SimpleData name="REFERENCE">Boetius et al 2000</SimpleData>
							<SimpleData name="PROVIDER">Gilbert T. Rowe</SimpleData>
							<SimpleData name="BODY.OF.WATER">Arabian Sea</SimpleData>
							<SimpleData name="REGION">Arabian Sea</SimpleData>
							<SimpleData name="OCEAN.SEA">Arabian Sea</SimpleData>
							<SimpleData name="HABITAT">Continental Slope</SimpleData>
							<SimpleData name="COMMENTS">Cell volume = 0.033 um3, CF = 3E-13 g C um-3</SimpleData>
						</SchemaData>
					</ExtendedData>
					<Point>
						<coordinates>60.26666666999999,16.21666667,0</coordinates>
					</Point>
				</Placemark>
				<Placemark>
					<styleUrl>#m_ylw-pushpin</styleUrl>
					<ExtendedData>
						<SchemaData schemaUrl="#data">
							<SimpleData name="CATEGORY">bacteria</SimpleData>
							<SimpleData name="STATION">WAST</SimpleData>
							<SimpleData name="REPLICATION"></SimpleData>
							<SimpleData name="DEPTH.m">4050</SimpleData>
							<SimpleData name="DATE.UTC">Sep/Oct 95</SimpleData>
							<SimpleData name="GEAR">Multicorer</SimpleData>
							<SimpleData name="GEAR2">Core</SimpleData>
							<SimpleData name="SEDIMENT.DEPTH.cm">5</SimpleData>
							<SimpleData name="AREA.m2">0.13-0.57</SimpleData>
							<SimpleData name="ABUNDANCE.per.m2">40404000000000</SimpleData>
							<SimpleData name="DATA.TYPE.ABUNDANCE">Raw</SimpleData>
							<SimpleData name="CARBON.WT.mg.C.per.m2">400</SimpleData>
							<SimpleData name="FINAL.UNIT.TYPE">organic C</SimpleData>
							<SimpleData name="CONVERSION.FACTOR.from.Rowe.1983">*1</SimpleData>
							<SimpleData name="FINAL.BIOMASS..mg.C.per.m2">400</SimpleData>
							<SimpleData name="REFERENCE">Boetius et al 2000</SimpleData>
							<SimpleData name="PROVIDER">Gilbert T. Rowe</SimpleData>
							<SimpleData name="BODY.OF.WATER">Arabian Sea</SimpleData>
							<SimpleData name="REGION">Arabian Sea</SimpleData>
							<SimpleData name="OCEAN.SEA">Arabian Sea</SimpleData>
							<SimpleData name="HABITAT">Continental Slope</SimpleData>
							<SimpleData name="COMMENTS">Cell volume = 0.033 um3, CF = 3E-13 g C um-3</SimpleData>
						</SchemaData>
					</ExtendedData>
					<Point>
						<coordinates>60.26666666999999,16.21666667,0</coordinates>
					</Point>
				</Placemark>
				<Placemark>
					<styleUrl>#m_ylw-pushpin</styleUrl>
					<ExtendedData>
						<SchemaData schemaUrl="#data">
							<SimpleData name="CATEGORY">bacteria</SimpleData>
							<SimpleData name="STATION">WAST</SimpleData>
							<SimpleData name="REPLICATION"></SimpleData>
							<SimpleData name="DEPTH.m">4050</SimpleData>
							<SimpleData name="DATE.UTC">Apr/May 97</SimpleData>
							<SimpleData name="GEAR">Multicorer</SimpleData>
							<SimpleData name="GEAR2">Core</SimpleData>
							<SimpleData name="SEDIMENT.DEPTH.cm">5</SimpleData>
							<SimpleData name="AREA.m2">0.13-0.57</SimpleData>
							<SimpleData name="ABUNDANCE.per.m2">80808100000000</SimpleData>
							<SimpleData name="DATA.TYPE.ABUNDANCE">Raw</SimpleData>
							<SimpleData name="CARBON.WT.mg.C.per.m2">800</SimpleData>
							<SimpleData name="FINAL.UNIT.TYPE">organic C</SimpleData>
							<SimpleData name="CONVERSION.FACTOR.from.Rowe.1983">*1</SimpleData>
							<SimpleData name="FINAL.BIOMASS..mg.C.per.m2">800</SimpleData>
							<SimpleData name="REFERENCE">Boetius et al 2000</SimpleData>
							<SimpleData name="PROVIDER">Gilbert T. Rowe</SimpleData>
							<SimpleData name="BODY.OF.WATER">Arabian Sea</SimpleData>
							<SimpleData name="REGION">Arabian Sea</SimpleData>
							<SimpleData name="OCEAN.SEA">Arabian Sea</SimpleData>
							<SimpleData name="HABITAT">Continental Slope</SimpleData>
							<SimpleData name="COMMENTS">Cell volume = 0.033 um3, CF = 3E-13 g C um-3</SimpleData>
						</SchemaData>
					</ExtendedData>
					<Point>
						<coordinates>60.26666666999999,16.21666667,0</coordinates>
					</Point>
				</Placemark>
				<Placemark>
					<styleUrl>#m_ylw-pushpin</styleUrl>
					<ExtendedData>
						<SchemaData schemaUrl="#data">
							<SimpleData name="CATEGORY">bacteria</SimpleData>
							<SimpleData name="STATION">WAST</SimpleData>
							<SimpleData name="REPLICATION"></SimpleData>
							<SimpleData name="DEPTH.m">4050</SimpleData>
							<SimpleData name="DATE.UTC">Feb/Mar 98</SimpleData>
							<SimpleData name="GEAR">Multicorer</SimpleData>
							<SimpleData name="GEAR2">Core</SimpleData>
							<SimpleData name="SEDIMENT.DEPTH.cm">5</SimpleData>
							<SimpleData name="AREA.m2">0.13-0.57</SimpleData>
							<SimpleData name="ABUNDANCE.per.m2">111111000000000</SimpleData>
							<SimpleData name="DATA.TYPE.ABUNDANCE">Raw</SimpleData>
							<SimpleData name="CARBON.WT.mg.C.per.m2">1100</SimpleData>
							<SimpleData name="FINAL.UNIT.TYPE">organic C</SimpleData>
							<SimpleData name="CONVERSION.FACTOR.from.Rowe.1983">*1</SimpleData>
							<SimpleData name="FINAL.BIOMASS..mg.C.per.m2">1100</SimpleData>
							<SimpleData name="REFERENCE">Boetius et al 2000</SimpleData>
							<SimpleData name="PROVIDER">Gilbert T. Rowe</SimpleData>
							<SimpleData name="BODY.OF.WATER">Arabian Sea</SimpleData>
							<SimpleData name="REGION">Arabian Sea</SimpleData>
							<SimpleData name="OCEAN.SEA">Arabian Sea</SimpleData>
							<SimpleData name="HABITAT">Continental Slope</SimpleData>
							<SimpleData name="COMMENTS">Cell volume = 0.033 um3, CF = 3E-13 g C um-3</SimpleData>
						</SchemaData>
					</ExtendedData>
					<Point>
						<coordinates>60.26666666999999,16.21666667,0</coordinates>
					</Point>
				</Placemark>
				<Placemark>
					<styleUrl>#m_ylw-pushpin</styleUrl>
					<ExtendedData>
						<SchemaData schemaUrl="#data">
							<SimpleData name="CATEGORY">bacteria</SimpleData>
							<SimpleData name="STATION">WAST-TOP</SimpleData>
							<SimpleData name="REPLICATION"></SimpleData>
							<SimpleData name="DEPTH.m">1920</SimpleData>
							<SimpleData name="DATE.UTC">3/1/1995</SimpleData>
							<SimpleData name="GEAR">Multicorer</SimpleData>
							<SimpleData name="GEAR2">Core</SimpleData>
							<SimpleData name="SEDIMENT.DEPTH.cm">5</SimpleData>
							<SimpleData name="AREA.m2">0.13-0.57</SimpleData>
							<SimpleData name="ABUNDANCE.per.m2">30303000000000</SimpleData>
							<SimpleData name="DATA.TYPE.ABUNDANCE">Raw</SimpleData>
							<SimpleData name="CARBON.WT.mg.C.per.m2">300</SimpleData>
							<SimpleData name="FINAL.UNIT.TYPE">organic C</SimpleData>
							<SimpleData name="CONVERSION.FACTOR.from.Rowe.1983">*1</SimpleData>
							<SimpleData name="FINAL.BIOMASS..mg.C.per.m2">300</SimpleData>
							<SimpleData name="REFERENCE">Boetius et al 2000</SimpleData>
							<SimpleData name="PROVIDER">Gilbert T. Rowe</SimpleData>
							<SimpleData name="BODY.OF.WATER">Arabian Sea</SimpleData>
							<SimpleData name="REGION">Arabian Sea</SimpleData>
							<SimpleData name="OCEAN.SEA">Arabian Sea</SimpleData>
							<SimpleData name="HABITAT">Continental Slope</SimpleData>
							<SimpleData name="COMMENTS">Cell volume = 0.033 um3, CF = 3E-13 g C um-3</SimpleData>
						</SchemaData>
					</ExtendedData>
					<Point>
						<coordinates>59.76666667,16.16666667,0</coordinates>
					</Point>
				</Placemark>
				<Placemark>
					<styleUrl>#m_ylw-pushpin</styleUrl>
					<ExtendedData>
						<SchemaData schemaUrl="#data">
							<SimpleData name="CATEGORY">bacteria</SimpleData>
							<SimpleData name="STATION">WAST-TOP</SimpleData>
							<SimpleData name="REPLICATION"></SimpleData>
							<SimpleData name="DEPTH.m">1920</SimpleData>
							<SimpleData name="DATE.UTC">Apr/May 97</SimpleData>
							<SimpleData name="GEAR">Multicorer</SimpleData>
							<SimpleData name="GEAR2">Core</SimpleData>
							<SimpleData name="SEDIMENT.DEPTH.cm">5</SimpleData>
							<SimpleData name="AREA.m2">0.13-0.57</SimpleData>
							<SimpleData name="ABUNDANCE.per.m2">70707100000000</SimpleData>
							<SimpleData name="DATA.TYPE.ABUNDANCE">Raw</SimpleData>
							<SimpleData name="CARBON.WT.mg.C.per.m2">700</SimpleData>
							<SimpleData name="FINAL.UNIT.TYPE">organic C</SimpleData>
							<SimpleData name="CONVERSION.FACTOR.from.Rowe.1983">*1</SimpleData>
							<SimpleData name="FINAL.BIOMASS..mg.C.per.m2">700</SimpleData>
							<SimpleData name="REFERENCE">Boetius et al 2000</SimpleData>
							<SimpleData name="PROVIDER">Gilbert T. Rowe</SimpleData>
							<SimpleData name="BODY.OF.WATER">Arabian Sea</SimpleData>
							<SimpleData name="REGION">Arabian Sea</SimpleData>
							<SimpleData name="OCEAN.SEA">Arabian Sea</SimpleData>
							<SimpleData name="HABITAT">Continental Slope</SimpleData>
							<SimpleData name="COMMENTS">Cell volume = 0.033 um3, CF = 3E-13 g C um-3</SimpleData>
						</SchemaData>
					</ExtendedData>
					<Point>
						<coordinates>59.76666667,16.16666667,0</coordinates>
					</Point>
				</Placemark>
				<Placemark>
					<styleUrl>#m_ylw-pushpin</styleUrl>
					<ExtendedData>
						<SchemaData schemaUrl="#data">
							<SimpleData name="CATEGORY">bacteria</SimpleData>
							<SimpleData name="STATION">WAST-TOP</SimpleData>
							<SimpleData name="REPLICATION"></SimpleData>
							<SimpleData name="DEPTH.m">1920</SimpleData>
							<SimpleData name="DATE.UTC">Feb/Mar 98</SimpleData>
							<SimpleData name="GEAR">Multicorer</SimpleData>
							<SimpleData name="GEAR2">Core</SimpleData>
							<SimpleData name="SEDIMENT.DEPTH.cm">5</SimpleData>
							<SimpleData name="AREA.m2">0.13-0.57</SimpleData>
							<SimpleData name="ABUNDANCE.per.m2">70707100000000</SimpleData>
							<SimpleData name="DATA.TYPE.ABUNDANCE">Raw</SimpleData>
							<SimpleData name="CARBON.WT.mg.C.per.m2">700</SimpleData>
							<SimpleData name="FINAL.UNIT.TYPE">organic C</SimpleData>
							<SimpleData name="CONVERSION.FACTOR.from.Rowe.1983">*1</SimpleData>
							<SimpleData name="FINAL.BIOMASS..mg.C.per.m2">700</SimpleData>
							<SimpleData name="REFERENCE">Boetius et al 2000</SimpleData>
							<SimpleData name="PROVIDER">Gilbert T. Rowe</SimpleData>
							<SimpleData name="BODY.OF.WATER">Arabian Sea</SimpleData>
							<SimpleData name="REGION">Arabian Sea</SimpleData>
							<SimpleData name="OCEAN.SEA">Arabian Sea</SimpleData>
							<SimpleData name="HABITAT">Continental Slope</SimpleData>
							<SimpleData name="COMMENTS">Cell volume = 0.033 um3, CF = 3E-13 g C um-3</SimpleData>
						</SchemaData>
					</ExtendedData>
					<Point>
						<coordinates>59.76666667,16.16666667,0</coordinates>
					</Point>
				</Placemark>
				<Placemark>
					<styleUrl>#m_ylw-pushpin</styleUrl>
					<ExtendedData>
						<SchemaData schemaUrl="#data">
							<SimpleData name="CATEGORY">bacteria</SimpleData>
							<SimpleData name="STATION">2300 N</SimpleData>
							<SimpleData name="REPLICATION"></SimpleData>
							<SimpleData name="DEPTH.m">2300</SimpleData>
							<SimpleData name="DATE.UTC"></SimpleData>
							<SimpleData name="GEAR">Multi-corer</SimpleData>
							<SimpleData name="GEAR2">Core</SimpleData>
							<SimpleData name="SEDIMENT.DEPTH.cm">3</SimpleData>
							<SimpleData name="AREA.m2">0.008</SimpleData>
							<SimpleData name="DATA.TYPE.ABUNDANCE"></SimpleData>
							<SimpleData name="CARBON.WT.mg.C.per.m2">738.9162562</SimpleData>
							<SimpleData name="FINAL.UNIT.TYPE">organic C</SimpleData>
							<SimpleData name="CONVERSION.FACTOR.from.Rowe.1983">*1</SimpleData>
							<SimpleData name="FINAL.BIOMASS..mg.C.per.m2">738.9162562</SimpleData>
							<SimpleData name="REFERENCE">Nodder et al 2003</SimpleData>
							<SimpleData name="PROVIDER">Gilbert T. Rowe</SimpleData>
							<SimpleData name="BODY.OF.WATER">Chatham Rise</SimpleData>
							<SimpleData name="REGION">SW Pacific</SimpleData>
							<SimpleData name="OCEAN.SEA">Pacific</SimpleData>
							<SimpleData name="HABITAT">Continental Slope</SimpleData>
							<SimpleData name="COMMENTS"></SimpleData>
						</SchemaData>
					</ExtendedData>
					<Point>
						<coordinates>178.5,-42.5,0</coordinates>
					</Point>
				</Placemark>
				<Placemark>
					<styleUrl>#m_ylw-pushpin</styleUrl>
					<ExtendedData>
						<SchemaData schemaUrl="#data">
							<SimpleData name="CATEGORY">bacteria</SimpleData>
							<SimpleData name="STATION">1000 N</SimpleData>
							<SimpleData name="REPLICATION"></SimpleData>
							<SimpleData name="DEPTH.m">1000</SimpleData>
							<SimpleData name="DATE.UTC"></SimpleData>
							<SimpleData name="GEAR">Multi-corer</SimpleData>
							<SimpleData name="GEAR2">Core</SimpleData>
							<SimpleData name="SEDIMENT.DEPTH.cm">3</SimpleData>
							<SimpleData name="AREA.m2">0.008</SimpleData>
							<SimpleData name="DATA.TYPE.ABUNDANCE"></SimpleData>
							<SimpleData name="CARBON.WT.mg.C.per.m2">798.0295567</SimpleData>
							<SimpleData name="FINAL.UNIT.TYPE">organic C</SimpleData>
							<SimpleData name="CONVERSION.FACTOR.from.Rowe.1983">*1</SimpleData>
							<SimpleData name="FINAL.BIOMASS..mg.C.per.m2">798.0295567</SimpleData>
							<SimpleData name="REFERENCE">Nodder et al 2003</SimpleData>
							<SimpleData name="PROVIDER">Gilbert T. Rowe</SimpleData>
							<SimpleData name="BODY.OF.WATER">Chatham Rise</SimpleData>
							<SimpleData name="REGION">SW Pacific</SimpleData>
							<SimpleData name="OCEAN.SEA">Pacific</SimpleData>
							<SimpleData name="HABITAT">Continental Slope</SimpleData>
							<SimpleData name="COMMENTS"></SimpleData>
						</SchemaData>
					</ExtendedData>
					<Point>
						<coordinates>178.5,-42.48333333,0</coordinates>
					</Point>
				</Placemark>
				<Placemark>
					<styleUrl>#m_ylw-pushpin</styleUrl>
					<ExtendedData>
						<SchemaData schemaUrl="#data">
							<SimpleData name="CATEGORY">bacteria</SimpleData>
							<SimpleData name="STATION">450 N</SimpleData>
							<SimpleData name="REPLICATION"></SimpleData>
							<SimpleData name="DEPTH.m">450</SimpleData>
							<SimpleData name="DATE.UTC"></SimpleData>
							<SimpleData name="GEAR">Multi-corer</SimpleData>
							<SimpleData name="GEAR2">Core</SimpleData>
							<SimpleData name="SEDIMENT.DEPTH.cm">3</SimpleData>
							<SimpleData name="AREA.m2">0.008</SimpleData>
							<SimpleData name="DATA.TYPE.ABUNDANCE"></SimpleData>
							<SimpleData name="CARBON.WT.mg.C.per.m2">1256.157635</SimpleData>
							<SimpleData name="FINAL.UNIT.TYPE">organic C</SimpleData>
							<SimpleData name="CONVERSION.FACTOR.from.Rowe.1983">*1</SimpleData>
							<SimpleData name="FINAL.BIOMASS..mg.C.per.m2">1256.157635</SimpleData>
							<SimpleData name="REFERENCE">Nodder et al 2003</SimpleData>
							<SimpleData name="PROVIDER">Gilbert T. Rowe</SimpleData>
							<SimpleData name="BODY.OF.WATER">Chatham Rise</SimpleData>
							<SimpleData name="REGION">SW Pacific</SimpleData>
							<SimpleData name="OCEAN.SEA">Pacific</SimpleData>
							<SimpleData name="HABITAT">Continental Slope</SimpleData>
							<SimpleData name="COMMENTS"></SimpleData>
						</SchemaData>
					</ExtendedData>
					<Point>
						<coordinates>178.5,-42.975,0</coordinates>
					</Point>
				</Placemark>
				<Placemark>
					<styleUrl>#m_ylw-pushpin</styleUrl>
					<ExtendedData>
						<SchemaData schemaUrl="#data">
							<SimpleData name="CATEGORY">bacteria</SimpleData>
							<SimpleData name="STATION">350 Crest</SimpleData>
							<SimpleData name="REPLICATION"></SimpleData>
							<SimpleData name="DEPTH.m">350</SimpleData>
							<SimpleData name="DATE.UTC"></SimpleData>
							<SimpleData name="GEAR">Multi-corer</SimpleData>
							<SimpleData name="GEAR2">Core</SimpleData>
							<SimpleData name="SEDIMENT.DEPTH.cm">3</SimpleData>
							<SimpleData name="AREA.m2">0.008</SimpleData>
							<SimpleData name="DATA.TYPE.ABUNDANCE"></SimpleData>
							<SimpleData name="CARBON.WT.mg.C.per.m2">295.5665025</SimpleData>
							<SimpleData name="FINAL.UNIT.TYPE">organic C</SimpleData>
							<SimpleData name="CONVERSION.FACTOR.from.Rowe.1983">*1</SimpleData>
							<SimpleData name="FINAL.BIOMASS..mg.C.per.m2">295.5665025</SimpleData>
							<SimpleData name="REFERENCE">Nodder et al 2003</SimpleData>
							<SimpleData name="PROVIDER">Gilbert T. Rowe</SimpleData>
							<SimpleData name="BODY.OF.WATER">Chatham Rise</SimpleData>
							<SimpleData name="REGION">SW Pacific</SimpleData>
							<SimpleData name="OCEAN.SEA">Pacific</SimpleData>
							<SimpleData name="HABITAT">Continental Slope</SimpleData>
							<SimpleData name="COMMENTS"></SimpleData>
						</SchemaData>
					</ExtendedData>
					<Point>
						<coordinates>178.5,-43.43333333,0</coordinates>
					</Point>
				</Placemark>
				<Placemark>
					<styleUrl>#m_ylw-pushpin</styleUrl>
					<ExtendedData>
						<SchemaData schemaUrl="#data">
							<SimpleData name="CATEGORY">bacteria</SimpleData>
							<SimpleData name="STATION">450 S</SimpleData>
							<SimpleData name="REPLICATION"></SimpleData>
							<SimpleData name="DEPTH.m">450</SimpleData>
							<SimpleData name="DATE.UTC"></SimpleData>
							<SimpleData name="GEAR">Multi-corer</SimpleData>
							<SimpleData name="GEAR2">Core</SimpleData>
							<SimpleData name="SEDIMENT.DEPTH.cm">3</SimpleData>
							<SimpleData name="AREA.m2">0.008</SimpleData>
							<SimpleData name="DATA.TYPE.ABUNDANCE"></SimpleData>
							<SimpleData name="CARBON.WT.mg.C.per.m2">1522.167488</SimpleData>
							<SimpleData name="FINAL.UNIT.TYPE">organic C</SimpleData>
							<SimpleData name="CONVERSION.FACTOR.from.Rowe.1983">*1</SimpleData>
							<SimpleData name="FINAL.BIOMASS..mg.C.per.m2">1522.167488</SimpleData>
							<SimpleData name="REFERENCE">Nodder et al 2003</SimpleData>
							<SimpleData name="PROVIDER">Gilbert T. Rowe</SimpleData>
							<SimpleData name="BODY.OF.WATER">Chatham Rise</SimpleData>
							<SimpleData name="REGION">SW Pacific</SimpleData>
							<SimpleData name="OCEAN.SEA">Pacific</SimpleData>
							<SimpleData name="HABITAT">Continental Slope</SimpleData>
							<SimpleData name="COMMENTS"></SimpleData>
						</SchemaData>
					</ExtendedData>
					<Point>
						<coordinates>178.5,-43.825,0</coordinates>
					</Point>
				</Placemark>
				<Placemark>
					<styleUrl>#m_ylw-pushpin</styleUrl>
					<ExtendedData>
						<SchemaData schemaUrl="#data">
							<SimpleData name="CATEGORY">bacteria</SimpleData>
							<SimpleData name="STATION">750 S</SimpleData>
							<SimpleData name="REPLICATION"></SimpleData>
							<SimpleData name="DEPTH.m">750</SimpleData>
							<SimpleData name="DATE.UTC"></SimpleData>
							<SimpleData name="GEAR">Multi-corer</SimpleData>
							<SimpleData name="GEAR2">Core</SimpleData>
							<SimpleData name="SEDIMENT.DEPTH.cm">3</SimpleData>
							<SimpleData name="AREA.m2">0.008</SimpleData>
							<SimpleData name="DATA.TYPE.ABUNDANCE"></SimpleData>
							<SimpleData name="CARBON.WT.mg.C.per.m2">487.6847291</SimpleData>
							<SimpleData name="FINAL.UNIT.TYPE">organic C</SimpleData>
							<SimpleData name="CONVERSION.FACTOR.from.Rowe.1983">*1</SimpleData>
							<SimpleData name="FINAL.BIOMASS..mg.C.per.m2">487.6847291</SimpleData>
							<SimpleData name="REFERENCE">Nodder et al 2003</SimpleData>
							<SimpleData name="PROVIDER">Gilbert T. Rowe</SimpleData>
							<SimpleData name="BODY.OF.WATER">Chatham Rise</SimpleData>
							<SimpleData name="REGION">SW Pacific</SimpleData>
							<SimpleData name="OCEAN.SEA">Pacific</SimpleData>
							<SimpleData name="HABITAT">Continental Slope</SimpleData>
							<SimpleData name="COMMENTS"></SimpleData>
						</SchemaData>
					</ExtendedData>
					<Point>
						<coordinates>178.5,-44,0</coordinates>
					</Point>
				</Placemark>
				<Placemark>
					<styleUrl>#m_ylw-pushpin</styleUrl>
					<ExtendedData>
						<SchemaData schemaUrl="#data">
							<SimpleData name="CATEGORY">bacteria</SimpleData>
							<SimpleData name="STATION">1000 S</SimpleData>
							<SimpleData name="REPLICATION"></SimpleData>
							<SimpleData name="DEPTH.m">1000</SimpleData>
							<SimpleData name="DATE.UTC"></SimpleData>
							<SimpleData name="GEAR">Multi-corer</SimpleData>
							<SimpleData name="GEAR2">Core</SimpleData>
							<SimpleData name="SEDIMENT.DEPTH.cm">3</SimpleData>
							<SimpleData name="AREA.m2">0.008</SimpleData>
							<SimpleData name="DATA.TYPE.ABUNDANCE"></SimpleData>
							<SimpleData name="CARBON.WT.mg.C.per.m2">192.1182266</SimpleData>
							<SimpleData name="FINAL.UNIT.TYPE">organic C</SimpleData>
							<SimpleData name="CONVERSION.FACTOR.from.Rowe.1983">*1</SimpleData>
							<SimpleData name="FINAL.BIOMASS..mg.C.per.m2">192.1182266</SimpleData>
							<SimpleData name="REFERENCE">Nodder et al 2003</SimpleData>
							<SimpleData name="PROVIDER">Gilbert T. Rowe</SimpleData>
							<SimpleData name="BODY.OF.WATER">Chatham Rise</SimpleData>
							<SimpleData name="REGION">SW Pacific</SimpleData>
							<SimpleData name="OCEAN.SEA">Pacific</SimpleData>
							<SimpleData name="HABITAT">Continental Slope</SimpleData>
							<SimpleData name="COMMENTS"></SimpleData>
						</SchemaData>
					</ExtendedData>
					<Point>
						<coordinates>178.5,-44.15,0</coordinates>
					</Point>
				</Placemark>
				<Placemark>
					<styleUrl>#m_ylw-pushpin</styleUrl>
					<ExtendedData>
						<SchemaData schemaUrl="#data">
							<SimpleData name="CATEGORY">bacteria</SimpleData>
							<SimpleData name="STATION">1200 S</SimpleData>
							<SimpleData name="REPLICATION"></SimpleData>
							<SimpleData name="DEPTH.m">1200</SimpleData>
							<SimpleData name="DATE.UTC"></SimpleData>
							<SimpleData name="GEAR">Multi-corer</SimpleData>
							<SimpleData name="GEAR2">Core</SimpleData>
							<SimpleData name="SEDIMENT.DEPTH.cm">3</SimpleData>
							<SimpleData name="AREA.m2">0.008</SimpleData>
							<SimpleData name="DATA.TYPE.ABUNDANCE"></SimpleData>
							<SimpleData name="CARBON.WT.mg.C.per.m2">2423.64532</SimpleData>
							<SimpleData name="FINAL.UNIT.TYPE">organic C</SimpleData>
							<SimpleData name="CONVERSION.FACTOR.from.Rowe.1983">*1</SimpleData>
							<SimpleData name="FINAL.BIOMASS..mg.C.per.m2">2423.64532</SimpleData>
							<SimpleData name="REFERENCE">Nodder et al 2003</SimpleData>
							<SimpleData name="PROVIDER">Gilbert T. Rowe</SimpleData>
							<SimpleData name="BODY.OF.WATER">Chatham Rise</SimpleData>
							<SimpleData name="REGION">SW Pacific</SimpleData>
							<SimpleData name="OCEAN.SEA">Pacific</SimpleData>
							<SimpleData name="HABITAT">Continental Slope</SimpleData>
							<SimpleData name="COMMENTS"></SimpleData>
						</SchemaData>
					</ExtendedData>
					<Point>
						<coordinates>178.5,-44.33333333,0</coordinates>
					</Point>
				</Placemark>
				<Placemark>
					<styleUrl>#m_ylw-pushpin</styleUrl>
					<ExtendedData>
						<SchemaData schemaUrl="#data">
							<SimpleData name="CATEGORY">bacteria</SimpleData>
							<SimpleData name="STATION">2300 S</SimpleData>
							<SimpleData name="REPLICATION"></SimpleData>
							<SimpleData name="DEPTH.m">2300</SimpleData>
							<SimpleData name="DATE.UTC"></SimpleData>
							<SimpleData name="GEAR">Multi-corer</SimpleData>
							<SimpleData name="GEAR2">Core</SimpleData>
							<SimpleData name="SEDIMENT.DEPTH.cm">3</SimpleData>
							<SimpleData name="AREA.m2">0.008</SimpleData>
							<SimpleData name="DATA.TYPE.ABUNDANCE"></SimpleData>
							<SimpleData name="CARBON.WT.mg.C.per.m2">1004.926108</SimpleData>
							<SimpleData name="FINAL.UNIT.TYPE">organic C</SimpleData>
							<SimpleData name="CONVERSION.FACTOR.from.Rowe.1983">*1</SimpleData>
							<SimpleData name="FINAL.BIOMASS..mg.C.per.m2">1004.926108</SimpleData>
							<SimpleData name="REFERENCE">Nodder et al 2003</SimpleData>
							<SimpleData name="PROVIDER">Gilbert T. Rowe</SimpleData>
							<SimpleData name="BODY.OF.WATER">Chatham Rise</SimpleData>
							<SimpleData name="REGION">SW Pacific</SimpleData>
							<SimpleData name="OCEAN.SEA">Pacific</SimpleData>
							<SimpleData name="HABITAT">Continental Slope</SimpleData>
							<SimpleData name="COMMENTS"></SimpleData>
						</SchemaData>
					</ExtendedData>
					<Point>
						<coordinates>178.5,-44.95,0</coordinates>
					</Point>
				</Placemark>
				<Placemark>
					<styleUrl>#m_ylw-pushpin</styleUrl>
					<ExtendedData>
						<SchemaData schemaUrl="#data">
							<SimpleData name="CATEGORY">bacteria</SimpleData>
							<SimpleData name="STATION">2600 S</SimpleData>
							<SimpleData name="REPLICATION"></SimpleData>
							<SimpleData name="DEPTH.m">2600</SimpleData>
							<SimpleData name="DATE.UTC"></SimpleData>
							<SimpleData name="GEAR">Multi-corer</SimpleData>
							<SimpleData name="GEAR2">Core</SimpleData>
							<SimpleData name="SEDIMENT.DEPTH.cm">3</SimpleData>
							<SimpleData name="AREA.m2">0.008</SimpleData>
							<SimpleData name="DATA.TYPE.ABUNDANCE"></SimpleData>
							<SimpleData name="CARBON.WT.mg.C.per.m2">221.6748768</SimpleData>
							<SimpleData name="FINAL.UNIT.TYPE">organic C</SimpleData>
							<SimpleData name="CONVERSION.FACTOR.from.Rowe.1983">*1</SimpleData>
							<SimpleData name="FINAL.BIOMASS..mg.C.per.m2">221.6748768</SimpleData>
							<SimpleData name="REFERENCE">Nodder et al 2003</SimpleData>
							<SimpleData name="PROVIDER">Gilbert T. Rowe</SimpleData>
							<SimpleData name="BODY.OF.WATER">Chatham Rise</SimpleData>
							<SimpleData name="REGION">SW Pacific</SimpleData>
							<SimpleData name="OCEAN.SEA">Pacific</SimpleData>
							<SimpleData name="HABITAT">Continental Slope</SimpleData>
							<SimpleData name="COMMENTS"></SimpleData>
						</SchemaData>
					</ExtendedData>
					<Point>
						<coordinates>178.5,-46.66666667,0</coordinates>
					</Point>
				</Placemark>
				<Placemark>
					<styleUrl>#m_ylw-pushpin</styleUrl>
					<ExtendedData>
						<SchemaData schemaUrl="#data">
							<SimpleData name="CATEGORY">bacteria</SimpleData>
							<SimpleData name="STATION">Pelagic site</SimpleData>
							<SimpleData name="REPLICATION"></SimpleData>
							<SimpleData name="DEPTH.m">3950</SimpleData>
							<SimpleData name="DATE.UTC"></SimpleData>
							<SimpleData name="GEAR">USNEL Box corer</SimpleData>
							<SimpleData name="GEAR2">Core</SimpleData>
							<SimpleData name="SEDIMENT.DEPTH.cm">10</SimpleData>
							<SimpleData name="AREA.m2">0.002922467</SimpleData>
							<SimpleData name="ABUNDANCE.per.m2">27300000000000</SimpleData>
							<SimpleData name="DATA.TYPE.ABUNDANCE">Raw</SimpleData>
							<SimpleData name="WET.WT.mg.per.m2">3410</SimpleData>
							<SimpleData name="CARBON.WT.mg.C.per.m2">273</SimpleData>
							<SimpleData name="FINAL.UNIT.TYPE">organic C</SimpleData>
							<SimpleData name="CONVERSION.FACTOR.from.Rowe.1983">*1</SimpleData>
							<SimpleData name="FINAL.BIOMASS..mg.C.per.m2">273</SimpleData>
							<SimpleData name="REFERENCE">Richardson &amp; Young 1987</SimpleData>
							<SimpleData name="PROVIDER">Gilbert T. Rowe</SimpleData>
							<SimpleData name="BODY.OF.WATER">Venezuela Basin</SimpleData>
							<SimpleData name="REGION">E Caribbean Sea</SimpleData>
							<SimpleData name="OCEAN.SEA">Caribbeabn Sea</SimpleData>
							<SimpleData name="HABITAT">Continental Slope</SimpleData>
							<SimpleData name="COMMENTS">Eastern side of the Beata Ridge</SimpleData>
						</SchemaData>
					</ExtendedData>
					<Point>
						<coordinates>-69.36666667,15.11666667,0</coordinates>
					</Point>
				</Placemark>
				<Placemark>
					<styleUrl>#m_ylw-pushpin</styleUrl>
					<ExtendedData>
						<SchemaData schemaUrl="#data">
							<SimpleData name="CATEGORY">bacteria</SimpleData>
							<SimpleData name="STATION">Turbidite site</SimpleData>
							<SimpleData name="REPLICATION"></SimpleData>
							<SimpleData name="DEPTH.m">5050</SimpleData>
							<SimpleData name="DATE.UTC"></SimpleData>
							<SimpleData name="GEAR">USNEL Box corer</SimpleData>
							<SimpleData name="GEAR2">Core</SimpleData>
							<SimpleData name="SEDIMENT.DEPTH.cm">10</SimpleData>
							<SimpleData name="AREA.m2">0.002922467</SimpleData>
							<SimpleData name="ABUNDANCE.per.m2">15000000000000</SimpleData>
							<SimpleData name="DATA.TYPE.ABUNDANCE">Raw</SimpleData>
							<SimpleData name="WET.WT.mg.per.m2">1880</SimpleData>
							<SimpleData name="CARBON.WT.mg.C.per.m2">150</SimpleData>
							<SimpleData name="FINAL.UNIT.TYPE">organic C</SimpleData>
							<SimpleData name="CONVERSION.FACTOR.from.Rowe.1983">*1</SimpleData>
							<SimpleData name="FINAL.BIOMASS..mg.C.per.m2">150</SimpleData>
							<SimpleData name="REFERENCE">Richardson &amp; Young 1987</SimpleData>
							<SimpleData name="PROVIDER">Gilbert T. Rowe</SimpleData>
							<SimpleData name="BODY.OF.WATER">Venezuela Basin</SimpleData>
							<SimpleData name="REGION">E Caribbean Sea</SimpleData>
							<SimpleData name="OCEAN.SEA">Caribbean Sea</SimpleData>
							<SimpleData name="HABITAT">Abssysal Plain</SimpleData>
							<SimpleData name="COMMENTS">Central Venezuela Abyssal Plain</SimpleData>
						</SchemaData>
					</ExtendedData>
					<Point>
						<coordinates>-67.75,13.75,0</coordinates>
					</Point>
				</Placemark>
				<Placemark>
					<styleUrl>#m_ylw-pushpin</styleUrl>
					<ExtendedData>
						<SchemaData schemaUrl="#data">
							<SimpleData name="CATEGORY">bacteria</SimpleData>
							<SimpleData name="STATION"></SimpleData>
							<SimpleData name="REPLICATION"></SimpleData>
							<SimpleData name="DEPTH.m">2462</SimpleData>
							<SimpleData name="DATE.UTC"></SimpleData>
							<SimpleData name="GEAR">Multicore</SimpleData>
							<SimpleData name="GEAR2">Core</SimpleData>
							<SimpleData name="SEDIMENT.DEPTH.cm">10</SimpleData>
							<SimpleData name="AREA.m2"></SimpleData>
							<SimpleData name="ABUNDANCE.per.m2">5218500000000</SimpleData>
							<SimpleData name="DATA.TYPE.ABUNDANCE">Raw</SimpleData>
							<SimpleData name="CARBON.WT.mg.C.per.m2">114.1443184</SimpleData>
							<SimpleData name="FINAL.UNIT.TYPE">organic C</SimpleData>
							<SimpleData name="CONVERSION.FACTOR.from.Rowe.1983">*1</SimpleData>
							<SimpleData name="FINAL.BIOMASS..mg.C.per.m2">114.1443184</SimpleData>
							<SimpleData name="REFERENCE">Danovaro et al 2008</SimpleData>
							<SimpleData name="PROVIDER">Roberto Danovaro</SimpleData>
							<SimpleData name="BODY.OF.WATER">Arctic</SimpleData>
							<SimpleData name="REGION">Arctic</SimpleData>
							<SimpleData name="OCEAN.SEA">Arctic</SimpleData>
							<SimpleData name="HABITAT">Continental Slope</SimpleData>
							<SimpleData name="COMMENTS"></SimpleData>
						</SchemaData>
					</ExtendedData>
					<Point>
						<coordinates>4.180166667,79.06516667,0</coordinates>
					</Point>
				</Placemark>
				<Placemark>
					<styleUrl>#m_ylw-pushpin</styleUrl>
					<ExtendedData>
						<SchemaData schemaUrl="#data">
							<SimpleData name="CATEGORY">bacteria</SimpleData>
							<SimpleData name="STATION"></SimpleData>
							<SimpleData name="REPLICATION"></SimpleData>
							<SimpleData name="DEPTH.m">2462</SimpleData>
							<SimpleData name="DATE.UTC"></SimpleData>
							<SimpleData name="GEAR">Multicore</SimpleData>
							<SimpleData name="GEAR2">Core</SimpleData>
							<SimpleData name="SEDIMENT.DEPTH.cm">10</SimpleData>
							<SimpleData name="AREA.m2"></SimpleData>
							<SimpleData name="ABUNDANCE.per.m2">6731630000000</SimpleData>
							<SimpleData name="DATA.TYPE.ABUNDANCE">Raw</SimpleData>
							<SimpleData name="CARBON.WT.mg.C.per.m2">154.0039577</SimpleData>
							<SimpleData name="FINAL.UNIT.TYPE">organic C</SimpleData>
							<SimpleData name="CONVERSION.FACTOR.from.Rowe.1983">*1</SimpleData>
							<SimpleData name="FINAL.BIOMASS..mg.C.per.m2">154.0039577</SimpleData>
							<SimpleData name="REFERENCE">Danovaro et al 2008</SimpleData>
							<SimpleData name="PROVIDER">Roberto Danovaro</SimpleData>
							<SimpleData name="BODY.OF.WATER">Arctic</SimpleData>
							<SimpleData name="REGION">Arctic</SimpleData>
							<SimpleData name="OCEAN.SEA">Arctic</SimpleData>
							<SimpleData name="HABITAT">Continental Slope</SimpleData>
							<SimpleData name="COMMENTS"></SimpleData>
						</SchemaData>
					</ExtendedData>
					<Point>
						<coordinates>4.180166667,79.06516667,0</coordinates>
					</Point>
				</Placemark>
				<Placemark>
					<styleUrl>#m_ylw-pushpin</styleUrl>
					<ExtendedData>
						<SchemaData schemaUrl="#data">
							<SimpleData name="CATEGORY">bacteria</SimpleData>
							<SimpleData name="STATION"></SimpleData>
							<SimpleData name="REPLICATION"></SimpleData>
							<SimpleData name="DEPTH.m">2462</SimpleData>
							<SimpleData name="DATE.UTC"></SimpleData>
							<SimpleData name="GEAR">Multicore</SimpleData>
							<SimpleData name="GEAR2">Core</SimpleData>
							<SimpleData name="SEDIMENT.DEPTH.cm">10</SimpleData>
							<SimpleData name="AREA.m2"></SimpleData>
							<SimpleData name="ABUNDANCE.per.m2">3705370000000</SimpleData>
							<SimpleData name="DATA.TYPE.ABUNDANCE">Raw</SimpleData>
							<SimpleData name="CARBON.WT.mg.C.per.m2">74.28467913</SimpleData>
							<SimpleData name="FINAL.UNIT.TYPE">organic C</SimpleData>
							<SimpleData name="CONVERSION.FACTOR.from.Rowe.1983">*1</SimpleData>
							<SimpleData name="FINAL.BIOMASS..mg.C.per.m2">74.28467913</SimpleData>
							<SimpleData name="REFERENCE">Danovaro et al 2008</SimpleData>
							<SimpleData name="PROVIDER">Roberto Danovaro</SimpleData>
							<SimpleData name="BODY.OF.WATER">Arctic</SimpleData>
							<SimpleData name="REGION">Arctic</SimpleData>
							<SimpleData name="OCEAN.SEA">Arctic</SimpleData>
							<SimpleData name="HABITAT">Continental Slope</SimpleData>
							<SimpleData name="COMMENTS"></SimpleData>
						</SchemaData>
					</ExtendedData>
					<Point>
						<coordinates>4.180166667,79.06516667,0</coordinates>
					</Point>
				</Placemark>
				<Placemark>
					<styleUrl>#m_ylw-pushpin</styleUrl>
					<ExtendedData>
						<SchemaData schemaUrl="#data">
							<SimpleData name="CATEGORY">bacteria</SimpleData>
							<SimpleData name="STATION"></SimpleData>
							<SimpleData name="REPLICATION"></SimpleData>
							<SimpleData name="DEPTH.m">5571</SimpleData>
							<SimpleData name="DATE.UTC"></SimpleData>
							<SimpleData name="GEAR">Multicore</SimpleData>
							<SimpleData name="GEAR2">Core</SimpleData>
							<SimpleData name="SEDIMENT.DEPTH.cm">10</SimpleData>
							<SimpleData name="AREA.m2"></SimpleData>
							<SimpleData name="ABUNDANCE.per.m2">11412100000000</SimpleData>
							<SimpleData name="DATA.TYPE.ABUNDANCE">Raw</SimpleData>
							<SimpleData name="CARBON.WT.mg.C.per.m2">319.4004457</SimpleData>
							<SimpleData name="FINAL.UNIT.TYPE">organic C</SimpleData>
							<SimpleData name="CONVERSION.FACTOR.from.Rowe.1983">*1</SimpleData>
							<SimpleData name="FINAL.BIOMASS..mg.C.per.m2">319.4004457</SimpleData>
							<SimpleData name="REFERENCE">Danovaro et al 2008</SimpleData>
							<SimpleData name="PROVIDER">Roberto Danovaro</SimpleData>
							<SimpleData name="BODY.OF.WATER">Arctic</SimpleData>
							<SimpleData name="REGION">Arctic</SimpleData>
							<SimpleData name="OCEAN.SEA">Arctic</SimpleData>
							<SimpleData name="HABITAT">Abyssal Plain</SimpleData>
							<SimpleData name="COMMENTS"></SimpleData>
						</SchemaData>
					</ExtendedData>
					<Point>
						<coordinates>2.842333333,79.1335,0</coordinates>
					</Point>
				</Placemark>
				<Placemark>
					<styleUrl>#m_ylw-pushpin</styleUrl>
					<ExtendedData>
						<SchemaData schemaUrl="#data">
							<SimpleData name="CATEGORY">bacteria</SimpleData>
							<SimpleData name="STATION"></SimpleData>
							<SimpleData name="REPLICATION"></SimpleData>
							<SimpleData name="DEPTH.m">5571</SimpleData>
							<SimpleData name="DATE.UTC"></SimpleData>
							<SimpleData name="GEAR">Multicore</SimpleData>
							<SimpleData name="GEAR2">Core</SimpleData>
							<SimpleData name="SEDIMENT.DEPTH.cm">10</SimpleData>
							<SimpleData name="AREA.m2"></SimpleData>
							<SimpleData name="ABUNDANCE.per.m2">13179400000000</SimpleData>
							<SimpleData name="DATA.TYPE.ABUNDANCE">Raw</SimpleData>
							<SimpleData name="CARBON.WT.mg.C.per.m2">367.48301</SimpleData>
							<SimpleData name="FINAL.UNIT.TYPE">organic C</SimpleData>
							<SimpleData name="CONVERSION.FACTOR.from.Rowe.1983">*1</SimpleData>
							<SimpleData name="FINAL.BIOMASS..mg.C.per.m2">367.48301</SimpleData>
							<SimpleData name="REFERENCE">Danovaro et al 2008</SimpleData>
							<SimpleData name="PROVIDER">Roberto Danovaro</SimpleData>
							<SimpleData name="BODY.OF.WATER">Arctic</SimpleData>
							<SimpleData name="REGION">Arctic</SimpleData>
							<SimpleData name="OCEAN.SEA">Arctic</SimpleData>
							<SimpleData name="HABITAT">Abyssal Plain</SimpleData>
							<SimpleData name="COMMENTS"></SimpleData>
						</SchemaData>
					</ExtendedData>
					<Point>
						<coordinates>2.842333333,79.1335,0</coordinates>
					</Point>
				</Placemark>
				<Placemark>
					<styleUrl>#m_ylw-pushpin</styleUrl>
					<ExtendedData>
						<SchemaData schemaUrl="#data">
							<SimpleData name="CATEGORY">bacteria</SimpleData>
							<SimpleData name="STATION"></SimpleData>
							<SimpleData name="REPLICATION"></SimpleData>
							<SimpleData name="DEPTH.m">5571</SimpleData>
							<SimpleData name="DATE.UTC"></SimpleData>
							<SimpleData name="GEAR">Multicore</SimpleData>
							<SimpleData name="GEAR2">Core</SimpleData>
							<SimpleData name="SEDIMENT.DEPTH.cm">10</SimpleData>
							<SimpleData name="AREA.m2"></SimpleData>
							<SimpleData name="ABUNDANCE.per.m2">12295800000000</SimpleData>
							<SimpleData name="DATA.TYPE.ABUNDANCE">Raw</SimpleData>
							<SimpleData name="CARBON.WT.mg.C.per.m2">271.3178813</SimpleData>
							<SimpleData name="FINAL.UNIT.TYPE">organic C</SimpleData>
							<SimpleData name="CONVERSION.FACTOR.from.Rowe.1983">*1</SimpleData>
							<SimpleData name="FINAL.BIOMASS..mg.C.per.m2">271.3178813</SimpleData>
							<SimpleData name="REFERENCE">Danovaro et al 2008</SimpleData>
							<SimpleData name="PROVIDER">Roberto Danovaro</SimpleData>
							<SimpleData name="BODY.OF.WATER">Arctic</SimpleData>
							<SimpleData name="REGION">Arctic</SimpleData>
							<SimpleData name="OCEAN.SEA">Arctic</SimpleData>
							<SimpleData name="HABITAT">Abyssal Plain</SimpleData>
							<SimpleData name="COMMENTS"></SimpleData>
						</SchemaData>
					</ExtendedData>
					<Point>
						<coordinates>2.842333333,79.1335,0</coordinates>
					</Point>
				</Placemark>
				<Placemark>
					<styleUrl>#m_ylw-pushpin</styleUrl>
					<ExtendedData>
						<SchemaData schemaUrl="#data">
							<SimpleData name="CATEGORY">bacteria</SimpleData>
							<SimpleData name="STATION"></SimpleData>
							<SimpleData name="REPLICATION"></SimpleData>
							<SimpleData name="DEPTH.m">2545</SimpleData>
							<SimpleData name="DATE.UTC"></SimpleData>
							<SimpleData name="GEAR">Multicore</SimpleData>
							<SimpleData name="GEAR2">Core</SimpleData>
							<SimpleData name="SEDIMENT.DEPTH.cm">10</SimpleData>
							<SimpleData name="AREA.m2"></SimpleData>
							<SimpleData name="ABUNDANCE.per.m2">10004100000000</SimpleData>
							<SimpleData name="DATA.TYPE.ABUNDANCE">Raw</SimpleData>
							<SimpleData name="CARBON.WT.mg.C.per.m2">232.2052274</SimpleData>
							<SimpleData name="FINAL.UNIT.TYPE">organic C</SimpleData>
							<SimpleData name="CONVERSION.FACTOR.from.Rowe.1983">*1</SimpleData>
							<SimpleData name="FINAL.BIOMASS..mg.C.per.m2">232.2052274</SimpleData>
							<SimpleData name="REFERENCE">Danovaro et al 2008</SimpleData>
							<SimpleData name="PROVIDER">Roberto Danovaro</SimpleData>
							<SimpleData name="BODY.OF.WATER">Arctic</SimpleData>
							<SimpleData name="REGION">Arctic</SimpleData>
							<SimpleData name="OCEAN.SEA">Arctic</SimpleData>
							<SimpleData name="HABITAT">Continental Slope</SimpleData>
							<SimpleData name="COMMENTS"></SimpleData>
						</SchemaData>
					</ExtendedData>
					<Point>
						<coordinates>4.6945,79.40983333,0</coordinates>
					</Point>
				</Placemark>
				<Placemark>
					<styleUrl>#m_ylw-pushpin</styleUrl>
					<ExtendedData>
						<SchemaData schemaUrl="#data">
							<SimpleData name="CATEGORY">bacteria</SimpleData>
							<SimpleData name="STATION"></SimpleData>
							<SimpleData name="REPLICATION"></SimpleData>
							<SimpleData name="DEPTH.m">2545</SimpleData>
							<SimpleData name="DATE.UTC"></SimpleData>
							<SimpleData name="GEAR">Multicore</SimpleData>
							<SimpleData name="GEAR2">Core</SimpleData>
							<SimpleData name="SEDIMENT.DEPTH.cm">10</SimpleData>
							<SimpleData name="AREA.m2"></SimpleData>
							<SimpleData name="ABUNDANCE.per.m2">10049400000000</SimpleData>
							<SimpleData name="DATA.TYPE.ABUNDANCE">Raw</SimpleData>
							<SimpleData name="CARBON.WT.mg.C.per.m2">257.5359127</SimpleData>
							<SimpleData name="FINAL.UNIT.TYPE">organic C</SimpleData>
							<SimpleData name="CONVERSION.FACTOR.from.Rowe.1983">*1</SimpleData>
							<SimpleData name="FINAL.BIOMASS..mg.C.per.m2">257.5359127</SimpleData>
							<SimpleData name="REFERENCE">Danovaro et al 2008</SimpleData>
							<SimpleData name="PROVIDER">Roberto Danovaro</SimpleData>
							<SimpleData name="BODY.OF.WATER">Arctic</SimpleData>
							<SimpleData name="REGION">Arctic</SimpleData>
							<SimpleData name="OCEAN.SEA">Arctic</SimpleData>
							<SimpleData name="HABITAT">Continental Slope</SimpleData>
							<SimpleData name="COMMENTS"></SimpleData>
						</SchemaData>
					</ExtendedData>
					<Point>
						<coordinates>4.6945,79.40983333,0</coordinates>
					</Point>
				</Placemark>
				<Placemark>
					<styleUrl>#m_ylw-pushpin</styleUrl>
					<ExtendedData>
						<SchemaData schemaUrl="#data">
							<SimpleData name="CATEGORY">bacteria</SimpleData>
							<SimpleData name="STATION"></SimpleData>
							<SimpleData name="REPLICATION"></SimpleData>
							<SimpleData name="DEPTH.m">2545</SimpleData>
							<SimpleData name="DATE.UTC"></SimpleData>
							<SimpleData name="GEAR">Multicore</SimpleData>
							<SimpleData name="GEAR2">Core</SimpleData>
							<SimpleData name="SEDIMENT.DEPTH.cm">10</SimpleData>
							<SimpleData name="AREA.m2"></SimpleData>
							<SimpleData name="ABUNDANCE.per.m2">9958820000000</SimpleData>
							<SimpleData name="DATA.TYPE.ABUNDANCE">Raw</SimpleData>
							<SimpleData name="CARBON.WT.mg.C.per.m2">206.8745421</SimpleData>
							<SimpleData name="FINAL.UNIT.TYPE">organic C</SimpleData>
							<SimpleData name="CONVERSION.FACTOR.from.Rowe.1983">*1</SimpleData>
							<SimpleData name="FINAL.BIOMASS..mg.C.per.m2">206.8745421</SimpleData>
							<SimpleData name="REFERENCE">Danovaro et al 2008</SimpleData>
							<SimpleData name="PROVIDER">Roberto Danovaro</SimpleData>
							<SimpleData name="BODY.OF.WATER">Arctic</SimpleData>
							<SimpleData name="REGION">Arctic</SimpleData>
							<SimpleData name="OCEAN.SEA">Arctic</SimpleData>
							<SimpleData name="HABITAT">Continental Slope</SimpleData>
							<SimpleData name="COMMENTS"></SimpleData>
						</SchemaData>
					</ExtendedData>
					<Point>
						<coordinates>4.6945,79.40983333,0</coordinates>
					</Point>
				</Placemark>
				<Placemark>
					<styleUrl>#m_ylw-pushpin</styleUrl>
					<ExtendedData>
						<SchemaData schemaUrl="#data">
							<SimpleData name="CATEGORY">bacteria</SimpleData>
							<SimpleData name="STATION"></SimpleData>
							<SimpleData name="REPLICATION"></SimpleData>
							<SimpleData name="DEPTH.m">2784</SimpleData>
							<SimpleData name="DATE.UTC"></SimpleData>
							<SimpleData name="GEAR">Multicore</SimpleData>
							<SimpleData name="GEAR2">Core</SimpleData>
							<SimpleData name="SEDIMENT.DEPTH.cm">10</SimpleData>
							<SimpleData name="AREA.m2"></SimpleData>
							<SimpleData name="ABUNDANCE.per.m2">8747310000000</SimpleData>
							<SimpleData name="DATA.TYPE.ABUNDANCE">Raw</SimpleData>
							<SimpleData name="CARBON.WT.mg.C.per.m2">394.2373558</SimpleData>
							<SimpleData name="FINAL.UNIT.TYPE">organic C</SimpleData>
							<SimpleData name="CONVERSION.FACTOR.from.Rowe.1983">*1</SimpleData>
							<SimpleData name="FINAL.BIOMASS..mg.C.per.m2">394.2373558</SimpleData>
							<SimpleData name="REFERENCE">Danovaro et al 2008</SimpleData>
							<SimpleData name="PROVIDER">Roberto Danovaro</SimpleData>
							<SimpleData name="BODY.OF.WATER">Arctic</SimpleData>
							<SimpleData name="REGION">Arctic</SimpleData>
							<SimpleData name="OCEAN.SEA">Arctic</SimpleData>
							<SimpleData name="HABITAT">Continental Slope</SimpleData>
							<SimpleData name="COMMENTS"></SimpleData>
						</SchemaData>
					</ExtendedData>
					<Point>
						<coordinates>4.603666667,79.59633332999999,0</coordinates>
					</Point>
				</Placemark>
				<Placemark>
					<styleUrl>#m_ylw-pushpin</styleUrl>
					<ExtendedData>
						<SchemaData schemaUrl="#data">
							<SimpleData name="CATEGORY">bacteria</SimpleData>
							<SimpleData name="STATION"></SimpleData>
							<SimpleData name="REPLICATION"></SimpleData>
							<SimpleData name="DEPTH.m">2784</SimpleData>
							<SimpleData name="DATE.UTC"></SimpleData>
							<SimpleData name="GEAR">Multicore</SimpleData>
							<SimpleData name="GEAR2">Core</SimpleData>
							<SimpleData name="SEDIMENT.DEPTH.cm">10</SimpleData>
							<SimpleData name="AREA.m2"></SimpleData>
							<SimpleData name="ABUNDANCE.per.m2">10752000000000</SimpleData>
							<SimpleData name="DATA.TYPE.ABUNDANCE">Raw</SimpleData>
							<SimpleData name="CARBON.WT.mg.C.per.m2">477.7249134</SimpleData>
							<SimpleData name="FINAL.UNIT.TYPE">organic C</SimpleData>
							<SimpleData name="CONVERSION.FACTOR.from.Rowe.1983">*1</SimpleData>
							<SimpleData name="FINAL.BIOMASS..mg.C.per.m2">477.7249134</SimpleData>
							<SimpleData name="REFERENCE">Danovaro et al 2008</SimpleData>
							<SimpleData name="PROVIDER">Roberto Danovaro</SimpleData>
							<SimpleData name="BODY.OF.WATER">Arctic</SimpleData>
							<SimpleData name="REGION">Arctic</SimpleData>
							<SimpleData name="OCEAN.SEA">Arctic</SimpleData>
							<SimpleData name="HABITAT">Continental Slope</SimpleData>
							<SimpleData name="COMMENTS"></SimpleData>
						</SchemaData>
					</ExtendedData>
					<Point>
						<coordinates>4.603666667,79.59633332999999,0</coordinates>
					</Point>
				</Placemark>
				<Placemark>
					<styleUrl>#m_ylw-pushpin</styleUrl>
					<ExtendedData>
						<SchemaData schemaUrl="#data">
							<SimpleData name="CATEGORY">bacteria</SimpleData>
							<SimpleData name="STATION"></SimpleData>
							<SimpleData name="REPLICATION"></SimpleData>
							<SimpleData name="DEPTH.m">2784</SimpleData>
							<SimpleData name="DATE.UTC"></SimpleData>
							<SimpleData name="GEAR">Multicore</SimpleData>
							<SimpleData name="GEAR2">Core</SimpleData>
							<SimpleData name="SEDIMENT.DEPTH.cm">10</SimpleData>
							<SimpleData name="AREA.m2"></SimpleData>
							<SimpleData name="ABUNDANCE.per.m2">6742650000000</SimpleData>
							<SimpleData name="DATA.TYPE.ABUNDANCE">Raw</SimpleData>
							<SimpleData name="CARBON.WT.mg.C.per.m2">310.7497982</SimpleData>
							<SimpleData name="FINAL.UNIT.TYPE">organic C</SimpleData>
							<SimpleData name="CONVERSION.FACTOR.from.Rowe.1983">*1</SimpleData>
							<SimpleData name="FINAL.BIOMASS..mg.C.per.m2">310.7497982</SimpleData>
							<SimpleData name="REFERENCE">Danovaro et al 2008</SimpleData>
							<SimpleData name="PROVIDER">Roberto Danovaro</SimpleData>
							<SimpleData name="BODY.OF.WATER">Arctic</SimpleData>
							<SimpleData name="REGION">Arctic</SimpleData>
							<SimpleData name="OCEAN.SEA">Arctic</SimpleData>
							<SimpleData name="HABITAT">Continental Slope</SimpleData>
							<SimpleData name="COMMENTS"></SimpleData>
						</SchemaData>
					</ExtendedData>
					<Point>
						<coordinates>4.603666667,79.59633332999999,0</coordinates>
					</Point>
				</Placemark>
				<Placemark>
					<styleUrl>#m_ylw-pushpin</styleUrl>
					<ExtendedData>
						<SchemaData schemaUrl="#data">
							<SimpleData name="CATEGORY">bacteria</SimpleData>
							<SimpleData name="STATION"></SimpleData>
							<SimpleData name="REPLICATION"></SimpleData>
							<SimpleData name="DEPTH.m">2397</SimpleData>
							<SimpleData name="DATE.UTC"></SimpleData>
							<SimpleData name="GEAR">Multicore</SimpleData>
							<SimpleData name="GEAR2">Core</SimpleData>
							<SimpleData name="SEDIMENT.DEPTH.cm">10</SimpleData>
							<SimpleData name="AREA.m2"></SimpleData>
							<SimpleData name="ABUNDANCE.per.m2">3293090000000</SimpleData>
							<SimpleData name="DATA.TYPE.ABUNDANCE">Raw</SimpleData>
							<SimpleData name="CARBON.WT.mg.C.per.m2">69.42934457</SimpleData>
							<SimpleData name="FINAL.UNIT.TYPE">organic C</SimpleData>
							<SimpleData name="CONVERSION.FACTOR.from.Rowe.1983">*1</SimpleData>
							<SimpleData name="FINAL.BIOMASS..mg.C.per.m2">69.42934457</SimpleData>
							<SimpleData name="REFERENCE">Danovaro et al 2008</SimpleData>
							<SimpleData name="PROVIDER">Roberto Danovaro</SimpleData>
							<SimpleData name="BODY.OF.WATER">Arctic</SimpleData>
							<SimpleData name="REGION">Arctic</SimpleData>
							<SimpleData name="OCEAN.SEA">Arctic</SimpleData>
							<SimpleData name="HABITAT">Continental Slope</SimpleData>
							<SimpleData name="COMMENTS"></SimpleData>
						</SchemaData>
					</ExtendedData>
					<Point>
						<coordinates>4.332,79.28233333,0</coordinates>
					</Point>
				</Placemark>
				<Placemark>
					<styleUrl>#m_ylw-pushpin</styleUrl>
					<ExtendedData>
						<SchemaData schemaUrl="#data">
							<SimpleData name="CATEGORY">bacteria</SimpleData>
							<SimpleData name="STATION"></SimpleData>
							<SimpleData name="REPLICATION"></SimpleData>
							<SimpleData name="DEPTH.m">2397</SimpleData>
							<SimpleData name="DATE.UTC"></SimpleData>
							<SimpleData name="GEAR">Multicore</SimpleData>
							<SimpleData name="GEAR2">Core</SimpleData>
							<SimpleData name="SEDIMENT.DEPTH.cm">10</SimpleData>
							<SimpleData name="AREA.m2"></SimpleData>
							<SimpleData name="ABUNDANCE.per.m2">3505290000000</SimpleData>
							<SimpleData name="DATA.TYPE.ABUNDANCE">Raw</SimpleData>
							<SimpleData name="CARBON.WT.mg.C.per.m2">75.54165286</SimpleData>
							<SimpleData name="FINAL.UNIT.TYPE">organic C</SimpleData>
							<SimpleData name="CONVERSION.FACTOR.from.Rowe.1983">*1</SimpleData>
							<SimpleData name="FINAL.BIOMASS..mg.C.per.m2">75.54165286</SimpleData>
							<SimpleData name="REFERENCE">Danovaro et al 2008</SimpleData>
							<SimpleData name="PROVIDER">Roberto Danovaro</SimpleData>
							<SimpleData name="BODY.OF.WATER">Arctic</SimpleData>
							<SimpleData name="REGION">Arctic</SimpleData>
							<SimpleData name="OCEAN.SEA">Arctic</SimpleData>
							<SimpleData name="HABITAT">Continental Slope</SimpleData>
							<SimpleData name="COMMENTS"></SimpleData>
						</SchemaData>
					</ExtendedData>
					<Point>
						<coordinates>4.332,79.28233333,0</coordinates>
					</Point>
				</Placemark>
				<Placemark>
					<styleUrl>#m_ylw-pushpin</styleUrl>
					<ExtendedData>
						<SchemaData schemaUrl="#data">
							<SimpleData name="CATEGORY">bacteria</SimpleData>
							<SimpleData name="STATION"></SimpleData>
							<SimpleData name="REPLICATION"></SimpleData>
							<SimpleData name="DEPTH.m">2397</SimpleData>
							<SimpleData name="DATE.UTC"></SimpleData>
							<SimpleData name="GEAR">Multicore</SimpleData>
							<SimpleData name="GEAR2">Core</SimpleData>
							<SimpleData name="SEDIMENT.DEPTH.cm">10</SimpleData>
							<SimpleData name="AREA.m2"></SimpleData>
							<SimpleData name="ABUNDANCE.per.m2">3080890000000</SimpleData>
							<SimpleData name="DATA.TYPE.ABUNDANCE">Raw</SimpleData>
							<SimpleData name="CARBON.WT.mg.C.per.m2">63.31703629</SimpleData>
							<SimpleData name="FINAL.UNIT.TYPE">organic C</SimpleData>
							<SimpleData name="CONVERSION.FACTOR.from.Rowe.1983">*1</SimpleData>
							<SimpleData name="FINAL.BIOMASS..mg.C.per.m2">63.31703629</SimpleData>
							<SimpleData name="REFERENCE">Danovaro et al 2008</SimpleData>
							<SimpleData name="PROVIDER">Roberto Danovaro</SimpleData>
							<SimpleData name="BODY.OF.WATER">Arctic</SimpleData>
							<SimpleData name="REGION">Arctic</SimpleData>
							<SimpleData name="OCEAN.SEA">Arctic</SimpleData>
							<SimpleData name="HABITAT">Continental Slope</SimpleData>
							<SimpleData name="COMMENTS"></SimpleData>
						</SchemaData>
					</ExtendedData>
					<Point>
						<coordinates>4.332,79.28233333,0</coordinates>
					</Point>
				</Placemark>
				<Placemark>
					<styleUrl>#m_ylw-pushpin</styleUrl>
					<ExtendedData>
						<SchemaData schemaUrl="#data">
							<SimpleData name="CATEGORY">bacteria</SimpleData>
							<SimpleData name="STATION"></SimpleData>
							<SimpleData name="REPLICATION"></SimpleData>
							<SimpleData name="DEPTH.m">3485</SimpleData>
							<SimpleData name="DATE.UTC"></SimpleData>
							<SimpleData name="GEAR">Multicore</SimpleData>
							<SimpleData name="GEAR2">Core</SimpleData>
							<SimpleData name="SEDIMENT.DEPTH.cm">10</SimpleData>
							<SimpleData name="AREA.m2"></SimpleData>
							<SimpleData name="ABUNDANCE.per.m2">5271400000000</SimpleData>
							<SimpleData name="DATA.TYPE.ABUNDANCE">Raw</SimpleData>
							<SimpleData name="CARBON.WT.mg.C.per.m2">94.91084222</SimpleData>
							<SimpleData name="FINAL.UNIT.TYPE">organic C</SimpleData>
							<SimpleData name="CONVERSION.FACTOR.from.Rowe.1983">*1</SimpleData>
							<SimpleData name="FINAL.BIOMASS..mg.C.per.m2">94.91084222</SimpleData>
							<SimpleData name="REFERENCE">Danovaro et al 2008</SimpleData>
							<SimpleData name="PROVIDER">Roberto Danovaro</SimpleData>
							<SimpleData name="BODY.OF.WATER">Arctic</SimpleData>
							<SimpleData name="REGION">Arctic</SimpleData>
							<SimpleData name="OCEAN.SEA">Arctic</SimpleData>
							<SimpleData name="HABITAT">Continental Slope</SimpleData>
							<SimpleData name="COMMENTS"></SimpleData>
						</SchemaData>
					</ExtendedData>
					<Point>
						<coordinates>3.5815,79.06,0</coordinates>
					</Point>
				</Placemark>
				<Placemark>
					<styleUrl>#m_ylw-pushpin</styleUrl>
					<ExtendedData>
						<SchemaData schemaUrl="#data">
							<SimpleData name="CATEGORY">bacteria</SimpleData>
							<SimpleData name="STATION"></SimpleData>
							<SimpleData name="REPLICATION"></SimpleData>
							<SimpleData name="DEPTH.m">3485</SimpleData>
							<SimpleData name="DATE.UTC"></SimpleData>
							<SimpleData name="GEAR">Multicore</SimpleData>
							<SimpleData name="GEAR2">Core</SimpleData>
							<SimpleData name="SEDIMENT.DEPTH.cm">10</SimpleData>
							<SimpleData name="AREA.m2"></SimpleData>
							<SimpleData name="ABUNDANCE.per.m2">6295850000000</SimpleData>
							<SimpleData name="DATA.TYPE.ABUNDANCE">Raw</SimpleData>
							<SimpleData name="CARBON.WT.mg.C.per.m2">115.6015196</SimpleData>
							<SimpleData name="FINAL.UNIT.TYPE">organic C</SimpleData>
							<SimpleData name="CONVERSION.FACTOR.from.Rowe.1983">*1</SimpleData>
							<SimpleData name="FINAL.BIOMASS..mg.C.per.m2">115.6015196</SimpleData>
							<SimpleData name="REFERENCE">Danovaro et al 2008</SimpleData>
							<SimpleData name="PROVIDER">Roberto Danovaro</SimpleData>
							<SimpleData name="BODY.OF.WATER">Arctic</SimpleData>
							<SimpleData name="REGION">Arctic</SimpleData>
							<SimpleData name="OCEAN.SEA">Arctic</SimpleData>
							<SimpleData name="HABITAT">Continental Slope</SimpleData>
							<SimpleData name="COMMENTS"></SimpleData>
						</SchemaData>
					</ExtendedData>
					<Point>
						<coordinates>3.5815,79.06,0</coordinates>
					</Point>
				</Placemark>
				<Placemark>
					<styleUrl>#m_ylw-pushpin</styleUrl>
					<ExtendedData>
						<SchemaData schemaUrl="#data">
							<SimpleData name="CATEGORY">bacteria</SimpleData>
							<SimpleData name="STATION"></SimpleData>
							<SimpleData name="REPLICATION"></SimpleData>
							<SimpleData name="DEPTH.m">3485</SimpleData>
							<SimpleData name="DATE.UTC"></SimpleData>
							<SimpleData name="GEAR">Multicore</SimpleData>
							<SimpleData name="GEAR2">Core</SimpleData>
							<SimpleData name="SEDIMENT.DEPTH.cm">10</SimpleData>
							<SimpleData name="AREA.m2"></SimpleData>
							<SimpleData name="ABUNDANCE.per.m2">4246940000000</SimpleData>
							<SimpleData name="DATA.TYPE.ABUNDANCE">Raw</SimpleData>
							<SimpleData name="CARBON.WT.mg.C.per.m2">74.22016489</SimpleData>
							<SimpleData name="FINAL.UNIT.TYPE">organic C</SimpleData>
							<SimpleData name="CONVERSION.FACTOR.from.Rowe.1983">*1</SimpleData>
							<SimpleData name="FINAL.BIOMASS..mg.C.per.m2">74.22016489</SimpleData>
							<SimpleData name="REFERENCE">Danovaro et al 2008</SimpleData>
							<SimpleData name="PROVIDER">Roberto Danovaro</SimpleData>
							<SimpleData name="BODY.OF.WATER">Arctic</SimpleData>
							<SimpleData name="REGION">Arctic</SimpleData>
							<SimpleData name="OCEAN.SEA">Arctic</SimpleData>
							<SimpleData name="HABITAT">Continental Slope</SimpleData>
							<SimpleData name="COMMENTS"></SimpleData>
						</SchemaData>
					</ExtendedData>
					<Point>
						<coordinates>3.5815,79.06,0</coordinates>
					</Point>
				</Placemark>
				<Placemark>
					<styleUrl>#m_ylw-pushpin</styleUrl>
					<ExtendedData>
						<SchemaData schemaUrl="#data">
							<SimpleData name="CATEGORY">bacteria</SimpleData>
							<SimpleData name="STATION"></SimpleData>
							<SimpleData name="REPLICATION"></SimpleData>
							<SimpleData name="DEPTH.m">3158</SimpleData>
							<SimpleData name="DATE.UTC"></SimpleData>
							<SimpleData name="GEAR">Multicore</SimpleData>
							<SimpleData name="GEAR2">Core</SimpleData>
							<SimpleData name="SEDIMENT.DEPTH.cm">10</SimpleData>
							<SimpleData name="AREA.m2"></SimpleData>
							<SimpleData name="ABUNDANCE.per.m2">5606720000000</SimpleData>
							<SimpleData name="DATA.TYPE.ABUNDANCE">Raw</SimpleData>
							<SimpleData name="CARBON.WT.mg.C.per.m2">99.7252613</SimpleData>
							<SimpleData name="FINAL.UNIT.TYPE">organic C</SimpleData>
							<SimpleData name="CONVERSION.FACTOR.from.Rowe.1983">*1</SimpleData>
							<SimpleData name="FINAL.BIOMASS..mg.C.per.m2">99.7252613</SimpleData>
							<SimpleData name="REFERENCE">Danovaro et al 2008</SimpleData>
							<SimpleData name="PROVIDER">Roberto Danovaro</SimpleData>
							<SimpleData name="BODY.OF.WATER">Arctic</SimpleData>
							<SimpleData name="REGION">Arctic</SimpleData>
							<SimpleData name="OCEAN.SEA">Arctic</SimpleData>
							<SimpleData name="HABITAT">Continental Slope</SimpleData>
							<SimpleData name="COMMENTS"></SimpleData>
						</SchemaData>
					</ExtendedData>
					<Point>
						<coordinates>3.658,79.06333333000001,0</coordinates>
					</Point>
				</Placemark>
				<Placemark>
					<styleUrl>#m_ylw-pushpin</styleUrl>
					<ExtendedData>
						<SchemaData schemaUrl="#data">
							<SimpleData name="CATEGORY">bacteria</SimpleData>
							<SimpleData name="STATION"></SimpleData>
							<SimpleData name="REPLICATION"></SimpleData>
							<SimpleData name="DEPTH.m">3158</SimpleData>
							<SimpleData name="DATE.UTC"></SimpleData>
							<SimpleData name="GEAR">Multicore</SimpleData>
							<SimpleData name="GEAR2">Core</SimpleData>
							<SimpleData name="SEDIMENT.DEPTH.cm">10</SimpleData>
							<SimpleData name="AREA.m2"></SimpleData>
							<SimpleData name="ABUNDANCE.per.m2">6381380000000</SimpleData>
							<SimpleData name="DATA.TYPE.ABUNDANCE">Raw</SimpleData>
							<SimpleData name="CARBON.WT.mg.C.per.m2">113.8632017</SimpleData>
							<SimpleData name="FINAL.UNIT.TYPE">organic C</SimpleData>
							<SimpleData name="CONVERSION.FACTOR.from.Rowe.1983">*1</SimpleData>
							<SimpleData name="FINAL.BIOMASS..mg.C.per.m2">113.8632017</SimpleData>
							<SimpleData name="REFERENCE">Danovaro et al 2008</SimpleData>
							<SimpleData name="PROVIDER">Roberto Danovaro</SimpleData>
							<SimpleData name="BODY.OF.WATER">Arctic</SimpleData>
							<SimpleData name="REGION">Arctic</SimpleData>
							<SimpleData name="OCEAN.SEA">Arctic</SimpleData>
							<SimpleData name="HABITAT">Continental Slope</SimpleData>
							<SimpleData name="COMMENTS"></SimpleData>
						</SchemaData>
					</ExtendedData>
					<Point>
						<coordinates>3.658,79.06333333000001,0</coordinates>
					</Point>
				</Placemark>
				<Placemark>
					<styleUrl>#m_ylw-pushpin</styleUrl>
					<ExtendedData>
						<SchemaData schemaUrl="#data">
							<SimpleData name="CATEGORY">bacteria</SimpleData>
							<SimpleData name="STATION"></SimpleData>
							<SimpleData name="REPLICATION"></SimpleData>
							<SimpleData name="DEPTH.m">3158</SimpleData>
							<SimpleData name="DATE.UTC"></SimpleData>
							<SimpleData name="GEAR">Multicore</SimpleData>
							<SimpleData name="GEAR2">Core</SimpleData>
							<SimpleData name="SEDIMENT.DEPTH.cm">10</SimpleData>
							<SimpleData name="AREA.m2"></SimpleData>
							<SimpleData name="ABUNDANCE.per.m2">4832060000000</SimpleData>
							<SimpleData name="DATA.TYPE.ABUNDANCE">Raw</SimpleData>
							<SimpleData name="CARBON.WT.mg.C.per.m2">85.5873209</SimpleData>
							<SimpleData name="FINAL.UNIT.TYPE">organic C</SimpleData>
							<SimpleData name="CONVERSION.FACTOR.from.Rowe.1983">*1</SimpleData>
							<SimpleData name="FINAL.BIOMASS..mg.C.per.m2">85.5873209</SimpleData>
							<SimpleData name="REFERENCE">Danovaro et al 2008</SimpleData>
							<SimpleData name="PROVIDER">Roberto Danovaro</SimpleData>
							<SimpleData name="BODY.OF.WATER">Arctic</SimpleData>
							<SimpleData name="REGION">Arctic</SimpleData>
							<SimpleData name="OCEAN.SEA">Arctic</SimpleData>
							<SimpleData name="HABITAT">Continental Slope</SimpleData>
							<SimpleData name="COMMENTS"></SimpleData>
						</SchemaData>
					</ExtendedData>
					<Point>
						<coordinates>3.658,79.06333333000001,0</coordinates>
					</Point>
				</Placemark>
				<Placemark>
					<styleUrl>#m_ylw-pushpin</styleUrl>
					<ExtendedData>
						<SchemaData schemaUrl="#data">
							<SimpleData name="CATEGORY">bacteria</SimpleData>
							<SimpleData name="STATION"></SimpleData>
							<SimpleData name="REPLICATION"></SimpleData>
							<SimpleData name="DEPTH.m">3997</SimpleData>
							<SimpleData name="DATE.UTC"></SimpleData>
							<SimpleData name="GEAR">Multicore</SimpleData>
							<SimpleData name="GEAR2">Core</SimpleData>
							<SimpleData name="SEDIMENT.DEPTH.cm">10</SimpleData>
							<SimpleData name="AREA.m2"></SimpleData>
							<SimpleData name="ABUNDANCE.per.m2">4982520000000</SimpleData>
							<SimpleData name="DATA.TYPE.ABUNDANCE">Raw</SimpleData>
							<SimpleData name="CARBON.WT.mg.C.per.m2">100.4840984</SimpleData>
							<SimpleData name="FINAL.UNIT.TYPE">organic C</SimpleData>
							<SimpleData name="CONVERSION.FACTOR.from.Rowe.1983">*1</SimpleData>
							<SimpleData name="FINAL.BIOMASS..mg.C.per.m2">100.4840984</SimpleData>
							<SimpleData name="REFERENCE">Danovaro et al 2008</SimpleData>
							<SimpleData name="PROVIDER">Roberto Danovaro</SimpleData>
							<SimpleData name="BODY.OF.WATER">Arctic</SimpleData>
							<SimpleData name="REGION">Arctic</SimpleData>
							<SimpleData name="OCEAN.SEA">Arctic</SimpleData>
							<SimpleData name="HABITAT">Continental Slope</SimpleData>
							<SimpleData name="COMMENTS"></SimpleData>
						</SchemaData>
					</ExtendedData>
					<Point>
						<coordinates>3.458833333,79.065,0</coordinates>
					</Point>
				</Placemark>
				<Placemark>
					<styleUrl>#m_ylw-pushpin</styleUrl>
					<ExtendedData>
						<SchemaData schemaUrl="#data">
							<SimpleData name="CATEGORY">bacteria</SimpleData>
							<SimpleData name="STATION"></SimpleData>
							<SimpleData name="REPLICATION"></SimpleData>
							<SimpleData name="DEPTH.m">3997</SimpleData>
							<SimpleData name="DATE.UTC"></SimpleData>
							<SimpleData name="GEAR">Multicore</SimpleData>
							<SimpleData name="GEAR2">Core</SimpleData>
							<SimpleData name="SEDIMENT.DEPTH.cm">10</SimpleData>
							<SimpleData name="AREA.m2"></SimpleData>
							<SimpleData name="ABUNDANCE.per.m2">5641920000000</SimpleData>
							<SimpleData name="DATA.TYPE.ABUNDANCE">Raw</SimpleData>
							<SimpleData name="CARBON.WT.mg.C.per.m2">119.6373089</SimpleData>
							<SimpleData name="FINAL.UNIT.TYPE">organic C</SimpleData>
							<SimpleData name="CONVERSION.FACTOR.from.Rowe.1983">*1</SimpleData>
							<SimpleData name="FINAL.BIOMASS..mg.C.per.m2">119.6373089</SimpleData>
							<SimpleData name="REFERENCE">Danovaro et al 2008</SimpleData>
							<SimpleData name="PROVIDER">Roberto Danovaro</SimpleData>
							<SimpleData name="BODY.OF.WATER">Arctic</SimpleData>
							<SimpleData name="REGION">Arctic</SimpleData>
							<SimpleData name="OCEAN.SEA">Arctic</SimpleData>
							<SimpleData name="HABITAT">Continental Slope</SimpleData>
							<SimpleData name="COMMENTS"></SimpleData>
						</SchemaData>
					</ExtendedData>
					<Point>
						<coordinates>3.458833333,79.065,0</coordinates>
					</Point>
				</Placemark>
				<Placemark>
					<styleUrl>#m_ylw-pushpin</styleUrl>
					<ExtendedData>
						<SchemaData schemaUrl="#data">
							<SimpleData name="CATEGORY">bacteria</SimpleData>
							<SimpleData name="STATION"></SimpleData>
							<SimpleData name="REPLICATION"></SimpleData>
							<SimpleData name="DEPTH.m">3997</SimpleData>
							<SimpleData name="DATE.UTC"></SimpleData>
							<SimpleData name="GEAR">Multicore</SimpleData>
							<SimpleData name="GEAR2">Core</SimpleData>
							<SimpleData name="SEDIMENT.DEPTH.cm">10</SimpleData>
							<SimpleData name="AREA.m2"></SimpleData>
							<SimpleData name="ABUNDANCE.per.m2">4323110000000</SimpleData>
							<SimpleData name="DATA.TYPE.ABUNDANCE">Raw</SimpleData>
							<SimpleData name="CARBON.WT.mg.C.per.m2">81.33088789</SimpleData>
							<SimpleData name="FINAL.UNIT.TYPE">organic C</SimpleData>
							<SimpleData name="CONVERSION.FACTOR.from.Rowe.1983">*1</SimpleData>
							<SimpleData name="FINAL.BIOMASS..mg.C.per.m2">81.33088789</SimpleData>
							<SimpleData name="REFERENCE">Danovaro et al 2008</SimpleData>
							<SimpleData name="PROVIDER">Roberto Danovaro</SimpleData>
							<SimpleData name="BODY.OF.WATER">Arctic</SimpleData>
							<SimpleData name="REGION">Arctic</SimpleData>
							<SimpleData name="OCEAN.SEA">Arctic</SimpleData>
							<SimpleData name="HABITAT">Continental Slope</SimpleData>
							<SimpleData name="COMMENTS"></SimpleData>
						</SchemaData>
					</ExtendedData>
					<Point>
						<coordinates>3.458833333,79.065,0</coordinates>
					</Point>
				</Placemark>
				<Placemark>
					<styleUrl>#m_ylw-pushpin</styleUrl>
					<ExtendedData>
						<SchemaData schemaUrl="#data">
							<SimpleData name="CATEGORY">bacteria</SimpleData>
							<SimpleData name="STATION"></SimpleData>
							<SimpleData name="REPLICATION"></SimpleData>
							<SimpleData name="DEPTH.m">5108</SimpleData>
							<SimpleData name="DATE.UTC"></SimpleData>
							<SimpleData name="GEAR">Multicore</SimpleData>
							<SimpleData name="GEAR2">Core</SimpleData>
							<SimpleData name="SEDIMENT.DEPTH.cm">10</SimpleData>
							<SimpleData name="AREA.m2"></SimpleData>
							<SimpleData name="ABUNDANCE.per.m2">4645220000000</SimpleData>
							<SimpleData name="DATA.TYPE.ABUNDANCE">Raw</SimpleData>
							<SimpleData name="CARBON.WT.mg.C.per.m2">105.5574712</SimpleData>
							<SimpleData name="FINAL.UNIT.TYPE">organic C</SimpleData>
							<SimpleData name="CONVERSION.FACTOR.from.Rowe.1983">*1</SimpleData>
							<SimpleData name="FINAL.BIOMASS..mg.C.per.m2">105.5574712</SimpleData>
							<SimpleData name="REFERENCE">Danovaro et al 2008</SimpleData>
							<SimpleData name="PROVIDER">Roberto Danovaro</SimpleData>
							<SimpleData name="BODY.OF.WATER">Arctic</SimpleData>
							<SimpleData name="REGION">Arctic</SimpleData>
							<SimpleData name="OCEAN.SEA">Arctic</SimpleData>
							<SimpleData name="HABITAT">Abyssal Plain</SimpleData>
							<SimpleData name="COMMENTS"></SimpleData>
						</SchemaData>
					</ExtendedData>
					<Point>
						<coordinates>3.336,79.06433333,0</coordinates>
					</Point>
				</Placemark>
				<Placemark>
					<styleUrl>#m_ylw-pushpin</styleUrl>
					<ExtendedData>
						<SchemaData schemaUrl="#data">
							<SimpleData name="CATEGORY">bacteria</SimpleData>
							<SimpleData name="STATION"></SimpleData>
							<SimpleData name="REPLICATION"></SimpleData>
							<SimpleData name="DEPTH.m">5108</SimpleData>
							<SimpleData name="DATE.UTC"></SimpleData>
							<SimpleData name="GEAR">Multicore</SimpleData>
							<SimpleData name="GEAR2">Core</SimpleData>
							<SimpleData name="SEDIMENT.DEPTH.cm">10</SimpleData>
							<SimpleData name="AREA.m2"></SimpleData>
							<SimpleData name="ABUNDANCE.per.m2">5715050000000</SimpleData>
							<SimpleData name="DATA.TYPE.ABUNDANCE">Raw</SimpleData>
							<SimpleData name="CARBON.WT.mg.C.per.m2">138.2848798</SimpleData>
							<SimpleData name="FINAL.UNIT.TYPE">organic C</SimpleData>
							<SimpleData name="CONVERSION.FACTOR.from.Rowe.1983">*1</SimpleData>
							<SimpleData name="FINAL.BIOMASS..mg.C.per.m2">138.2848798</SimpleData>
							<SimpleData name="REFERENCE">Danovaro et al 2008</SimpleData>
							<SimpleData name="PROVIDER">Roberto Danovaro</SimpleData>
							<SimpleData name="BODY.OF.WATER">Arctic</SimpleData>
							<SimpleData name="REGION">Arctic</SimpleData>
							<SimpleData name="OCEAN.SEA">Arctic</SimpleData>
							<SimpleData name="HABITAT">Abyssal Plain</SimpleData>
							<SimpleData name="COMMENTS"></SimpleData>
						</SchemaData>
					</ExtendedData>
					<Point>
						<coordinates>3.336,79.06433333,0</coordinates>
					</Point>
				</Placemark>
				<Placemark>
					<styleUrl>#m_ylw-pushpin</styleUrl>
					<ExtendedData>
						<SchemaData schemaUrl="#data">
							<SimpleData name="CATEGORY">bacteria</SimpleData>
							<SimpleData name="STATION"></SimpleData>
							<SimpleData name="REPLICATION"></SimpleData>
							<SimpleData name="DEPTH.m">5108</SimpleData>
							<SimpleData name="DATE.UTC"></SimpleData>
							<SimpleData name="GEAR">Multicore</SimpleData>
							<SimpleData name="GEAR2">Core</SimpleData>
							<SimpleData name="SEDIMENT.DEPTH.cm">10</SimpleData>
							<SimpleData name="AREA.m2"></SimpleData>
							<SimpleData name="ABUNDANCE.per.m2">3575400000000</SimpleData>
							<SimpleData name="DATA.TYPE.ABUNDANCE">Raw</SimpleData>
							<SimpleData name="CARBON.WT.mg.C.per.m2">72.83006274</SimpleData>
							<SimpleData name="FINAL.UNIT.TYPE">organic C</SimpleData>
							<SimpleData name="CONVERSION.FACTOR.from.Rowe.1983">*1</SimpleData>
							<SimpleData name="FINAL.BIOMASS..mg.C.per.m2">72.83006274</SimpleData>
							<SimpleData name="REFERENCE">Danovaro et al 2008</SimpleData>
							<SimpleData name="PROVIDER">Roberto Danovaro</SimpleData>
							<SimpleData name="BODY.OF.WATER">Arctic</SimpleData>
							<SimpleData name="REGION">Arctic</SimpleData>
							<SimpleData name="OCEAN.SEA">Arctic</SimpleData>
							<SimpleData name="HABITAT">Abyssal Plain</SimpleData>
							<SimpleData name="COMMENTS"></SimpleData>
						</SchemaData>
					</ExtendedData>
					<Point>
						<coordinates>3.336,79.06433333,0</coordinates>
					</Point>
				</Placemark>
				<Placemark>
					<styleUrl>#m_ylw-pushpin</styleUrl>
					<ExtendedData>
						<SchemaData schemaUrl="#data">
							<SimpleData name="CATEGORY">bacteria</SimpleData>
							<SimpleData name="STATION"></SimpleData>
							<SimpleData name="REPLICATION"></SimpleData>
							<SimpleData name="DEPTH.m">1914</SimpleData>
							<SimpleData name="DATE.UTC"></SimpleData>
							<SimpleData name="GEAR">Multicore</SimpleData>
							<SimpleData name="GEAR2">Core</SimpleData>
							<SimpleData name="SEDIMENT.DEPTH.cm">10</SimpleData>
							<SimpleData name="AREA.m2"></SimpleData>
							<SimpleData name="ABUNDANCE.per.m2">6443820000000</SimpleData>
							<SimpleData name="DATA.TYPE.ABUNDANCE">Raw</SimpleData>
							<SimpleData name="CARBON.WT.mg.C.per.m2">125.6419426</SimpleData>
							<SimpleData name="FINAL.UNIT.TYPE">organic C</SimpleData>
							<SimpleData name="CONVERSION.FACTOR.from.Rowe.1983">*1</SimpleData>
							<SimpleData name="FINAL.BIOMASS..mg.C.per.m2">125.6419426</SimpleData>
							<SimpleData name="REFERENCE">Danovaro et al 2008</SimpleData>
							<SimpleData name="PROVIDER">Roberto Danovaro</SimpleData>
							<SimpleData name="BODY.OF.WATER">Arctic</SimpleData>
							<SimpleData name="REGION">Arctic</SimpleData>
							<SimpleData name="OCEAN.SEA">Arctic</SimpleData>
							<SimpleData name="HABITAT">Continental Slope</SimpleData>
							<SimpleData name="COMMENTS"></SimpleData>
						</SchemaData>
					</ExtendedData>
					<Point>
						<coordinates>4.600333333,79.108,0</coordinates>
					</Point>
				</Placemark>
				<Placemark>
					<styleUrl>#m_ylw-pushpin</styleUrl>
					<ExtendedData>
						<SchemaData schemaUrl="#data">
							<SimpleData name="CATEGORY">bacteria</SimpleData>
							<SimpleData name="STATION"></SimpleData>
							<SimpleData name="REPLICATION"></SimpleData>
							<SimpleData name="DEPTH.m">1914</SimpleData>
							<SimpleData name="DATE.UTC"></SimpleData>
							<SimpleData name="GEAR">Multicore</SimpleData>
							<SimpleData name="GEAR2">Core</SimpleData>
							<SimpleData name="SEDIMENT.DEPTH.cm">10</SimpleData>
							<SimpleData name="AREA.m2"></SimpleData>
							<SimpleData name="ABUNDANCE.per.m2">7177680000000</SimpleData>
							<SimpleData name="DATA.TYPE.ABUNDANCE">Raw</SimpleData>
							<SimpleData name="CARBON.WT.mg.C.per.m2">153.5340163</SimpleData>
							<SimpleData name="FINAL.UNIT.TYPE">organic C</SimpleData>
							<SimpleData name="CONVERSION.FACTOR.from.Rowe.1983">*1</SimpleData>
							<SimpleData name="FINAL.BIOMASS..mg.C.per.m2">153.5340163</SimpleData>
							<SimpleData name="REFERENCE">Danovaro et al 2008</SimpleData>
							<SimpleData name="PROVIDER">Roberto Danovaro</SimpleData>
							<SimpleData name="BODY.OF.WATER">Arctic</SimpleData>
							<SimpleData name="REGION">Arctic</SimpleData>
							<SimpleData name="OCEAN.SEA">Arctic</SimpleData>
							<SimpleData name="HABITAT">Continental Slope</SimpleData>
							<SimpleData name="COMMENTS"></SimpleData>
						</SchemaData>
					</ExtendedData>
					<Point>
						<coordinates>4.600333333,79.108,0</coordinates>
					</Point>
				</Placemark>
				<Placemark>
					<styleUrl>#m_ylw-pushpin</styleUrl>
					<ExtendedData>
						<SchemaData schemaUrl="#data">
							<SimpleData name="CATEGORY">bacteria</SimpleData>
							<SimpleData name="STATION"></SimpleData>
							<SimpleData name="REPLICATION"></SimpleData>
							<SimpleData name="DEPTH.m">1914</SimpleData>
							<SimpleData name="DATE.UTC"></SimpleData>
							<SimpleData name="GEAR">Multicore</SimpleData>
							<SimpleData name="GEAR2">Core</SimpleData>
							<SimpleData name="SEDIMENT.DEPTH.cm">10</SimpleData>
							<SimpleData name="AREA.m2"></SimpleData>
							<SimpleData name="ABUNDANCE.per.m2">5709970000000</SimpleData>
							<SimpleData name="DATA.TYPE.ABUNDANCE">Raw</SimpleData>
							<SimpleData name="CARBON.WT.mg.C.per.m2">97.74986887</SimpleData>
							<SimpleData name="FINAL.UNIT.TYPE">organic C</SimpleData>
							<SimpleData name="CONVERSION.FACTOR.from.Rowe.1983">*1</SimpleData>
							<SimpleData name="FINAL.BIOMASS..mg.C.per.m2">97.74986887</SimpleData>
							<SimpleData name="REFERENCE">Danovaro et al 2008</SimpleData>
							<SimpleData name="PROVIDER">Roberto Danovaro</SimpleData>
							<SimpleData name="BODY.OF.WATER">Arctic</SimpleData>
							<SimpleData name="REGION">Arctic</SimpleData>
							<SimpleData name="OCEAN.SEA">Arctic</SimpleData>
							<SimpleData name="HABITAT">Continental Slope</SimpleData>
							<SimpleData name="COMMENTS"></SimpleData>
						</SchemaData>
					</ExtendedData>
					<Point>
						<coordinates>4.600333333,79.108,0</coordinates>
					</Point>
				</Placemark>
				<Placemark>
					<styleUrl>#m_ylw-pushpin</styleUrl>
					<ExtendedData>
						<SchemaData schemaUrl="#data">
							<SimpleData name="CATEGORY">bacteria</SimpleData>
							<SimpleData name="STATION"></SimpleData>
							<SimpleData name="REPLICATION"></SimpleData>
							<SimpleData name="DEPTH.m">2630</SimpleData>
							<SimpleData name="DATE.UTC"></SimpleData>
							<SimpleData name="GEAR">Multicore</SimpleData>
							<SimpleData name="GEAR2">Core</SimpleData>
							<SimpleData name="SEDIMENT.DEPTH.cm">10</SimpleData>
							<SimpleData name="AREA.m2"></SimpleData>
							<SimpleData name="ABUNDANCE.per.m2">3123800000000</SimpleData>
							<SimpleData name="DATA.TYPE.ABUNDANCE">Raw</SimpleData>
							<SimpleData name="CARBON.WT.mg.C.per.m2">68.19698281</SimpleData>
							<SimpleData name="FINAL.UNIT.TYPE">organic C</SimpleData>
							<SimpleData name="CONVERSION.FACTOR.from.Rowe.1983">*1</SimpleData>
							<SimpleData name="FINAL.BIOMASS..mg.C.per.m2">68.19698281</SimpleData>
							<SimpleData name="REFERENCE">Danovaro et al 2008</SimpleData>
							<SimpleData name="PROVIDER">Roberto Danovaro</SimpleData>
							<SimpleData name="BODY.OF.WATER">Arctic</SimpleData>
							<SimpleData name="REGION">Arctic</SimpleData>
							<SimpleData name="OCEAN.SEA">Arctic</SimpleData>
							<SimpleData name="HABITAT">Continental Slope</SimpleData>
							<SimpleData name="COMMENTS"></SimpleData>
						</SchemaData>
					</ExtendedData>
					<Point>
						<coordinates>5.0025,78.9175,0</coordinates>
					</Point>
				</Placemark>
				<Placemark>
					<styleUrl>#m_ylw-pushpin</styleUrl>
					<ExtendedData>
						<SchemaData schemaUrl="#data">
							<SimpleData name="CATEGORY">bacteria</SimpleData>
							<SimpleData name="STATION"></SimpleData>
							<SimpleData name="REPLICATION"></SimpleData>
							<SimpleData name="DEPTH.m">2630</SimpleData>
							<SimpleData name="DATE.UTC"></SimpleData>
							<SimpleData name="GEAR">Multicore</SimpleData>
							<SimpleData name="GEAR2">Core</SimpleData>
							<SimpleData name="SEDIMENT.DEPTH.cm">10</SimpleData>
							<SimpleData name="AREA.m2"></SimpleData>
							<SimpleData name="ABUNDANCE.per.m2">4710720000000</SimpleData>
							<SimpleData name="DATA.TYPE.ABUNDANCE">Raw</SimpleData>
							<SimpleData name="CARBON.WT.mg.C.per.m2">104.2045978</SimpleData>
							<SimpleData name="FINAL.UNIT.TYPE">organic C</SimpleData>
							<SimpleData name="CONVERSION.FACTOR.from.Rowe.1983">*1</SimpleData>
							<SimpleData name="FINAL.BIOMASS..mg.C.per.m2">104.2045978</SimpleData>
							<SimpleData name="REFERENCE">Danovaro et al 2008</SimpleData>
							<SimpleData name="PROVIDER">Roberto Danovaro</SimpleData>
							<SimpleData name="BODY.OF.WATER">Arctic</SimpleData>
							<SimpleData name="REGION">Arctic</SimpleData>
							<SimpleData name="OCEAN.SEA">Arctic</SimpleData>
							<SimpleData name="HABITAT">Continental Slope</SimpleData>
							<SimpleData name="COMMENTS"></SimpleData>
						</SchemaData>
					</ExtendedData>
					<Point>
						<coordinates>5.0025,78.9175,0</coordinates>
					</Point>
				</Placemark>
				<Placemark>
					<styleUrl>#m_ylw-pushpin</styleUrl>
					<ExtendedData>
						<SchemaData schemaUrl="#data">
							<SimpleData name="CATEGORY">bacteria</SimpleData>
							<SimpleData name="STATION"></SimpleData>
							<SimpleData name="REPLICATION"></SimpleData>
							<SimpleData name="DEPTH.m">2630</SimpleData>
							<SimpleData name="DATE.UTC"></SimpleData>
							<SimpleData name="GEAR">Multicore</SimpleData>
							<SimpleData name="GEAR2">Core</SimpleData>
							<SimpleData name="SEDIMENT.DEPTH.cm">10</SimpleData>
							<SimpleData name="AREA.m2"></SimpleData>
							<SimpleData name="ABUNDANCE.per.m2">1536870000000</SimpleData>
							<SimpleData name="DATA.TYPE.ABUNDANCE">Raw</SimpleData>
							<SimpleData name="CARBON.WT.mg.C.per.m2">32.18936786</SimpleData>
							<SimpleData name="FINAL.UNIT.TYPE">organic C</SimpleData>
							<SimpleData name="CONVERSION.FACTOR.from.Rowe.1983">*1</SimpleData>
							<SimpleData name="FINAL.BIOMASS..mg.C.per.m2">32.18936786</SimpleData>
							<SimpleData name="REFERENCE">Danovaro et al 2008</SimpleData>
							<SimpleData name="PROVIDER">Roberto Danovaro</SimpleData>
							<SimpleData name="BODY.OF.WATER">Arctic</SimpleData>
							<SimpleData name="REGION">Arctic</SimpleData>
							<SimpleData name="OCEAN.SEA">Arctic</SimpleData>
							<SimpleData name="HABITAT">Continental Slope</SimpleData>
							<SimpleData name="COMMENTS"></SimpleData>
						</SchemaData>
					</ExtendedData>
					<Point>
						<coordinates>5.0025,78.9175,0</coordinates>
					</Point>
				</Placemark>
				<Placemark>
					<styleUrl>#m_ylw-pushpin</styleUrl>
					<ExtendedData>
						<SchemaData schemaUrl="#data">
							<SimpleData name="CATEGORY">bacteria</SimpleData>
							<SimpleData name="STATION"></SimpleData>
							<SimpleData name="REPLICATION"></SimpleData>
							<SimpleData name="DEPTH.m">2467</SimpleData>
							<SimpleData name="DATE.UTC"></SimpleData>
							<SimpleData name="GEAR">Multicore</SimpleData>
							<SimpleData name="GEAR2">Core</SimpleData>
							<SimpleData name="SEDIMENT.DEPTH.cm">10</SimpleData>
							<SimpleData name="AREA.m2"></SimpleData>
							<SimpleData name="ABUNDANCE.per.m2">7522840000000</SimpleData>
							<SimpleData name="DATA.TYPE.ABUNDANCE">Raw</SimpleData>
							<SimpleData name="CARBON.WT.mg.C.per.m2">186.4711102</SimpleData>
							<SimpleData name="FINAL.UNIT.TYPE">organic C</SimpleData>
							<SimpleData name="CONVERSION.FACTOR.from.Rowe.1983">*1</SimpleData>
							<SimpleData name="FINAL.BIOMASS..mg.C.per.m2">186.4711102</SimpleData>
							<SimpleData name="REFERENCE">Danovaro et al 2008</SimpleData>
							<SimpleData name="PROVIDER">Roberto Danovaro</SimpleData>
							<SimpleData name="BODY.OF.WATER">Arctic</SimpleData>
							<SimpleData name="REGION">Arctic</SimpleData>
							<SimpleData name="OCEAN.SEA">Arctic</SimpleData>
							<SimpleData name="HABITAT">Continental Slope</SimpleData>
							<SimpleData name="COMMENTS"></SimpleData>
						</SchemaData>
					</ExtendedData>
					<Point>
						<coordinates>5.3325,78.7805,0</coordinates>
					</Point>
				</Placemark>
				<Placemark>
					<styleUrl>#m_ylw-pushpin</styleUrl>
					<ExtendedData>
						<SchemaData schemaUrl="#data">
							<SimpleData name="CATEGORY">bacteria</SimpleData>
							<SimpleData name="STATION"></SimpleData>
							<SimpleData name="REPLICATION"></SimpleData>
							<SimpleData name="DEPTH.m">2467</SimpleData>
							<SimpleData name="DATE.UTC"></SimpleData>
							<SimpleData name="GEAR">Multicore</SimpleData>
							<SimpleData name="GEAR2">Core</SimpleData>
							<SimpleData name="SEDIMENT.DEPTH.cm">10</SimpleData>
							<SimpleData name="AREA.m2"></SimpleData>
							<SimpleData name="ABUNDANCE.per.m2">9868070000000</SimpleData>
							<SimpleData name="DATA.TYPE.ABUNDANCE">Raw</SimpleData>
							<SimpleData name="CARBON.WT.mg.C.per.m2">265.7495751</SimpleData>
							<SimpleData name="FINAL.UNIT.TYPE">organic C</SimpleData>
							<SimpleData name="CONVERSION.FACTOR.from.Rowe.1983">*1</SimpleData>
							<SimpleData name="FINAL.BIOMASS..mg.C.per.m2">265.7495751</SimpleData>
							<SimpleData name="REFERENCE">Danovaro et al 2008</SimpleData>
							<SimpleData name="PROVIDER">Roberto Danovaro</SimpleData>
							<SimpleData name="BODY.OF.WATER">Arctic</SimpleData>
							<SimpleData name="REGION">Arctic</SimpleData>
							<SimpleData name="OCEAN.SEA">Arctic</SimpleData>
							<SimpleData name="HABITAT">Continental Slope</SimpleData>
							<SimpleData name="COMMENTS"></SimpleData>
						</SchemaData>
					</ExtendedData>
					<Point>
						<coordinates>5.3325,78.7805,0</coordinates>
					</Point>
				</Placemark>
				<Placemark>
					<styleUrl>#m_ylw-pushpin</styleUrl>
					<ExtendedData>
						<SchemaData schemaUrl="#data">
							<SimpleData name="CATEGORY">bacteria</SimpleData>
							<SimpleData name="STATION"></SimpleData>
							<SimpleData name="REPLICATION"></SimpleData>
							<SimpleData name="DEPTH.m">2467</SimpleData>
							<SimpleData name="DATE.UTC"></SimpleData>
							<SimpleData name="GEAR">Multicore</SimpleData>
							<SimpleData name="GEAR2">Core</SimpleData>
							<SimpleData name="SEDIMENT.DEPTH.cm">10</SimpleData>
							<SimpleData name="AREA.m2"></SimpleData>
							<SimpleData name="ABUNDANCE.per.m2">5177600000000</SimpleData>
							<SimpleData name="DATA.TYPE.ABUNDANCE">Raw</SimpleData>
							<SimpleData name="CARBON.WT.mg.C.per.m2">107.1926454</SimpleData>
							<SimpleData name="FINAL.UNIT.TYPE">organic C</SimpleData>
							<SimpleData name="CONVERSION.FACTOR.from.Rowe.1983">*1</SimpleData>
							<SimpleData name="FINAL.BIOMASS..mg.C.per.m2">107.1926454</SimpleData>
							<SimpleData name="REFERENCE">Danovaro et al 2008</SimpleData>
							<SimpleData name="PROVIDER">Roberto Danovaro</SimpleData>
							<SimpleData name="BODY.OF.WATER">Arctic</SimpleData>
							<SimpleData name="REGION">Arctic</SimpleData>
							<SimpleData name="OCEAN.SEA">Arctic</SimpleData>
							<SimpleData name="HABITAT">Continental Slope</SimpleData>
							<SimpleData name="COMMENTS"></SimpleData>
						</SchemaData>
					</ExtendedData>
					<Point>
						<coordinates>5.3325,78.7805,0</coordinates>
					</Point>
				</Placemark>
				<Placemark>
					<styleUrl>#m_ylw-pushpin</styleUrl>
					<ExtendedData>
						<SchemaData schemaUrl="#data">
							<SimpleData name="CATEGORY">bacteria</SimpleData>
							<SimpleData name="STATION"></SimpleData>
							<SimpleData name="REPLICATION"></SimpleData>
							<SimpleData name="DEPTH.m">2338</SimpleData>
							<SimpleData name="DATE.UTC"></SimpleData>
							<SimpleData name="GEAR">Multicore</SimpleData>
							<SimpleData name="GEAR2">Core</SimpleData>
							<SimpleData name="SEDIMENT.DEPTH.cm">10</SimpleData>
							<SimpleData name="AREA.m2"></SimpleData>
							<SimpleData name="ABUNDANCE.per.m2">6404810000000</SimpleData>
							<SimpleData name="DATA.TYPE.ABUNDANCE">Raw</SimpleData>
							<SimpleData name="CARBON.WT.mg.C.per.m2">143.7977145</SimpleData>
							<SimpleData name="FINAL.UNIT.TYPE">organic C</SimpleData>
							<SimpleData name="CONVERSION.FACTOR.from.Rowe.1983">*1</SimpleData>
							<SimpleData name="FINAL.BIOMASS..mg.C.per.m2">143.7977145</SimpleData>
							<SimpleData name="REFERENCE">Danovaro et al 2008</SimpleData>
							<SimpleData name="PROVIDER">Roberto Danovaro</SimpleData>
							<SimpleData name="BODY.OF.WATER">Arctic</SimpleData>
							<SimpleData name="REGION">Arctic</SimpleData>
							<SimpleData name="OCEAN.SEA">Arctic</SimpleData>
							<SimpleData name="HABITAT">Continental Slope</SimpleData>
							<SimpleData name="COMMENTS"></SimpleData>
						</SchemaData>
					</ExtendedData>
					<Point>
						<coordinates>5.083333333,78.59983333,0</coordinates>
					</Point>
				</Placemark>
				<Placemark>
					<styleUrl>#m_ylw-pushpin</styleUrl>
					<ExtendedData>
						<SchemaData schemaUrl="#data">
							<SimpleData name="CATEGORY">bacteria</SimpleData>
							<SimpleData name="STATION"></SimpleData>
							<SimpleData name="REPLICATION"></SimpleData>
							<SimpleData name="DEPTH.m">2338</SimpleData>
							<SimpleData name="DATE.UTC"></SimpleData>
							<SimpleData name="GEAR">Multicore</SimpleData>
							<SimpleData name="GEAR2">Core</SimpleData>
							<SimpleData name="SEDIMENT.DEPTH.cm">10</SimpleData>
							<SimpleData name="AREA.m2"></SimpleData>
							<SimpleData name="ABUNDANCE.per.m2">8132460000000</SimpleData>
							<SimpleData name="DATA.TYPE.ABUNDANCE">Raw</SimpleData>
							<SimpleData name="CARBON.WT.mg.C.per.m2">194.0547945</SimpleData>
							<SimpleData name="FINAL.UNIT.TYPE">organic C</SimpleData>
							<SimpleData name="CONVERSION.FACTOR.from.Rowe.1983">*1</SimpleData>
							<SimpleData name="FINAL.BIOMASS..mg.C.per.m2">194.0547945</SimpleData>
							<SimpleData name="REFERENCE">Danovaro et al 2008</SimpleData>
							<SimpleData name="PROVIDER">Roberto Danovaro</SimpleData>
							<SimpleData name="BODY.OF.WATER">Arctic</SimpleData>
							<SimpleData name="REGION">Arctic</SimpleData>
							<SimpleData name="OCEAN.SEA">Arctic</SimpleData>
							<SimpleData name="HABITAT">Continental Slope</SimpleData>
							<SimpleData name="COMMENTS"></SimpleData>
						</SchemaData>
					</ExtendedData>
					<Point>
						<coordinates>5.083333333,78.59983333,0</coordinates>
					</Point>
				</Placemark>
				<Placemark>
					<styleUrl>#m_ylw-pushpin</styleUrl>
					<ExtendedData>
						<SchemaData schemaUrl="#data">
							<SimpleData name="CATEGORY">bacteria</SimpleData>
							<SimpleData name="STATION"></SimpleData>
							<SimpleData name="REPLICATION"></SimpleData>
							<SimpleData name="DEPTH.m">2338</SimpleData>
							<SimpleData name="DATE.UTC"></SimpleData>
							<SimpleData name="GEAR">Multicore</SimpleData>
							<SimpleData name="GEAR2">Core</SimpleData>
							<SimpleData name="SEDIMENT.DEPTH.cm">10</SimpleData>
							<SimpleData name="AREA.m2"></SimpleData>
							<SimpleData name="ABUNDANCE.per.m2">4677160000000</SimpleData>
							<SimpleData name="DATA.TYPE.ABUNDANCE">Raw</SimpleData>
							<SimpleData name="CARBON.WT.mg.C.per.m2">93.54063452</SimpleData>
							<SimpleData name="FINAL.UNIT.TYPE">organic C</SimpleData>
							<SimpleData name="CONVERSION.FACTOR.from.Rowe.1983">*1</SimpleData>
							<SimpleData name="FINAL.BIOMASS..mg.C.per.m2">93.54063452</SimpleData>
							<SimpleData name="REFERENCE">Danovaro et al 2008</SimpleData>
							<SimpleData name="PROVIDER">Roberto Danovaro</SimpleData>
							<SimpleData name="BODY.OF.WATER">Arctic</SimpleData>
							<SimpleData name="REGION">Arctic</SimpleData>
							<SimpleData name="OCEAN.SEA">Arctic</SimpleData>
							<SimpleData name="HABITAT">Continental Slope</SimpleData>
							<SimpleData name="COMMENTS"></SimpleData>
						</SchemaData>
					</ExtendedData>
					<Point>
						<coordinates>5.083333333,78.59983333,0</coordinates>
					</Point>
				</Placemark>
				<Placemark>
					<styleUrl>#m_ylw-pushpin</styleUrl>
					<ExtendedData>
						<SchemaData schemaUrl="#data">
							<SimpleData name="CATEGORY">bacteria</SimpleData>
							<SimpleData name="STATION"></SimpleData>
							<SimpleData name="REPLICATION"></SimpleData>
							<SimpleData name="DEPTH.m">1548</SimpleData>
							<SimpleData name="DATE.UTC"></SimpleData>
							<SimpleData name="GEAR">Multicore</SimpleData>
							<SimpleData name="GEAR2">Core</SimpleData>
							<SimpleData name="SEDIMENT.DEPTH.cm">10</SimpleData>
							<SimpleData name="AREA.m2"></SimpleData>
							<SimpleData name="ABUNDANCE.per.m2">5263950000000</SimpleData>
							<SimpleData name="DATA.TYPE.ABUNDANCE">Raw</SimpleData>
							<SimpleData name="CARBON.WT.mg.C.per.m2">95.22868291</SimpleData>
							<SimpleData name="FINAL.UNIT.TYPE">organic C</SimpleData>
							<SimpleData name="CONVERSION.FACTOR.from.Rowe.1983">*1</SimpleData>
							<SimpleData name="FINAL.BIOMASS..mg.C.per.m2">95.22868291</SimpleData>
							<SimpleData name="REFERENCE">Danovaro et al 2008</SimpleData>
							<SimpleData name="PROVIDER">Roberto Danovaro</SimpleData>
							<SimpleData name="BODY.OF.WATER">Arctic</SimpleData>
							<SimpleData name="REGION">Arctic</SimpleData>
							<SimpleData name="OCEAN.SEA">Arctic</SimpleData>
							<SimpleData name="HABITAT">Continental Slope</SimpleData>
							<SimpleData name="COMMENTS"></SimpleData>
						</SchemaData>
					</ExtendedData>
					<Point>
						<coordinates>4.902166667,79.13016666999999,0</coordinates>
					</Point>
				</Placemark>
				<Placemark>
					<styleUrl>#m_ylw-pushpin</styleUrl>
					<ExtendedData>
						<SchemaData schemaUrl="#data">
							<SimpleData name="CATEGORY">bacteria</SimpleData>
							<SimpleData name="STATION"></SimpleData>
							<SimpleData name="REPLICATION"></SimpleData>
							<SimpleData name="DEPTH.m">1548</SimpleData>
							<SimpleData name="DATE.UTC"></SimpleData>
							<SimpleData name="GEAR">Multicore</SimpleData>
							<SimpleData name="GEAR2">Core</SimpleData>
							<SimpleData name="SEDIMENT.DEPTH.cm">10</SimpleData>
							<SimpleData name="AREA.m2"></SimpleData>
							<SimpleData name="ABUNDANCE.per.m2">6051350000000</SimpleData>
							<SimpleData name="DATA.TYPE.ABUNDANCE">Raw</SimpleData>
							<SimpleData name="CARBON.WT.mg.C.per.m2">111.8685675</SimpleData>
							<SimpleData name="FINAL.UNIT.TYPE">organic C</SimpleData>
							<SimpleData name="CONVERSION.FACTOR.from.Rowe.1983">*1</SimpleData>
							<SimpleData name="FINAL.BIOMASS..mg.C.per.m2">111.8685675</SimpleData>
							<SimpleData name="REFERENCE">Danovaro et al 2008</SimpleData>
							<SimpleData name="PROVIDER">Roberto Danovaro</SimpleData>
							<SimpleData name="BODY.OF.WATER">Arctic</SimpleData>
							<SimpleData name="REGION">Arctic</SimpleData>
							<SimpleData name="OCEAN.SEA">Arctic</SimpleData>
							<SimpleData name="HABITAT">Continental Slope</SimpleData>
							<SimpleData name="COMMENTS"></SimpleData>
						</SchemaData>
					</ExtendedData>
					<Point>
						<coordinates>4.902166667,79.13016666999999,0</coordinates>
					</Point>
				</Placemark>
				<Placemark>
					<styleUrl>#m_ylw-pushpin</styleUrl>
					<ExtendedData>
						<SchemaData schemaUrl="#data">
							<SimpleData name="CATEGORY">bacteria</SimpleData>
							<SimpleData name="STATION"></SimpleData>
							<SimpleData name="REPLICATION"></SimpleData>
							<SimpleData name="DEPTH.m">1548</SimpleData>
							<SimpleData name="DATE.UTC"></SimpleData>
							<SimpleData name="GEAR">Multicore</SimpleData>
							<SimpleData name="GEAR2">Core</SimpleData>
							<SimpleData name="SEDIMENT.DEPTH.cm">10</SimpleData>
							<SimpleData name="AREA.m2"></SimpleData>
							<SimpleData name="ABUNDANCE.per.m2">4476560000000</SimpleData>
							<SimpleData name="DATA.TYPE.ABUNDANCE">Raw</SimpleData>
							<SimpleData name="CARBON.WT.mg.C.per.m2">78.58879838</SimpleData>
							<SimpleData name="FINAL.UNIT.TYPE">organic C</SimpleData>
							<SimpleData name="CONVERSION.FACTOR.from.Rowe.1983">*1</SimpleData>
							<SimpleData name="FINAL.BIOMASS..mg.C.per.m2">78.58879838</SimpleData>
							<SimpleData name="REFERENCE">Danovaro et al 2008</SimpleData>
							<SimpleData name="PROVIDER">Roberto Danovaro</SimpleData>
							<SimpleData name="BODY.OF.WATER">Arctic</SimpleData>
							<SimpleData name="REGION">Arctic</SimpleData>
							<SimpleData name="OCEAN.SEA">Arctic</SimpleData>
							<SimpleData name="HABITAT">Continental Slope</SimpleData>
							<SimpleData name="COMMENTS"></SimpleData>
						</SchemaData>
					</ExtendedData>
					<Point>
						<coordinates>4.902166667,79.13016666999999,0</coordinates>
					</Point>
				</Placemark>
				<Placemark>
					<styleUrl>#m_ylw-pushpin</styleUrl>
					<ExtendedData>
						<SchemaData schemaUrl="#data">
							<SimpleData name="CATEGORY">bacteria</SimpleData>
							<SimpleData name="STATION"></SimpleData>
							<SimpleData name="REPLICATION"></SimpleData>
							<SimpleData name="DEPTH.m">1279</SimpleData>
							<SimpleData name="DATE.UTC"></SimpleData>
							<SimpleData name="GEAR">Multicore</SimpleData>
							<SimpleData name="GEAR2">Core</SimpleData>
							<SimpleData name="SEDIMENT.DEPTH.cm">10</SimpleData>
							<SimpleData name="AREA.m2"></SimpleData>
							<SimpleData name="ABUNDANCE.per.m2">8451790000000</SimpleData>
							<SimpleData name="DATA.TYPE.ABUNDANCE">Raw</SimpleData>
							<SimpleData name="CARBON.WT.mg.C.per.m2">168.8864268</SimpleData>
							<SimpleData name="FINAL.UNIT.TYPE">organic C</SimpleData>
							<SimpleData name="CONVERSION.FACTOR.from.Rowe.1983">*1</SimpleData>
							<SimpleData name="FINAL.BIOMASS..mg.C.per.m2">168.8864268</SimpleData>
							<SimpleData name="REFERENCE">Danovaro et al 2008</SimpleData>
							<SimpleData name="PROVIDER">Roberto Danovaro</SimpleData>
							<SimpleData name="BODY.OF.WATER">Arctic</SimpleData>
							<SimpleData name="REGION">Arctic</SimpleData>
							<SimpleData name="OCEAN.SEA">Arctic</SimpleData>
							<SimpleData name="HABITAT">Continental Slope</SimpleData>
							<SimpleData name="COMMENTS"></SimpleData>
						</SchemaData>
					</ExtendedData>
					<Point>
						<coordinates>6.092833333,79.13333333,0</coordinates>
					</Point>
				</Placemark>
				<Placemark>
					<styleUrl>#m_ylw-pushpin</styleUrl>
					<ExtendedData>
						<SchemaData schemaUrl="#data">
							<SimpleData name="CATEGORY">bacteria</SimpleData>
							<SimpleData name="STATION"></SimpleData>
							<SimpleData name="REPLICATION"></SimpleData>
							<SimpleData name="DEPTH.m">1279</SimpleData>
							<SimpleData name="DATE.UTC"></SimpleData>
							<SimpleData name="GEAR">Multicore</SimpleData>
							<SimpleData name="GEAR2">Core</SimpleData>
							<SimpleData name="SEDIMENT.DEPTH.cm">10</SimpleData>
							<SimpleData name="AREA.m2"></SimpleData>
							<SimpleData name="ABUNDANCE.per.m2">8526280000000</SimpleData>
							<SimpleData name="DATA.TYPE.ABUNDANCE">Raw</SimpleData>
							<SimpleData name="CARBON.WT.mg.C.per.m2">188.096501</SimpleData>
							<SimpleData name="FINAL.UNIT.TYPE">organic C</SimpleData>
							<SimpleData name="CONVERSION.FACTOR.from.Rowe.1983">*1</SimpleData>
							<SimpleData name="FINAL.BIOMASS..mg.C.per.m2">188.096501</SimpleData>
							<SimpleData name="REFERENCE">Danovaro et al 2008</SimpleData>
							<SimpleData name="PROVIDER">Roberto Danovaro</SimpleData>
							<SimpleData name="BODY.OF.WATER">Arctic</SimpleData>
							<SimpleData name="REGION">Arctic</SimpleData>
							<SimpleData name="OCEAN.SEA">Arctic</SimpleData>
							<SimpleData name="HABITAT">Continental Slope</SimpleData>
							<SimpleData name="COMMENTS"></SimpleData>
						</SchemaData>
					</ExtendedData>
					<Point>
						<coordinates>6.092833333,79.13333333,0</coordinates>
					</Point>
				</Placemark>
				<Placemark>
					<styleUrl>#m_ylw-pushpin</styleUrl>
					<ExtendedData>
						<SchemaData schemaUrl="#data">
							<SimpleData name="CATEGORY">bacteria</SimpleData>
							<SimpleData name="STATION"></SimpleData>
							<SimpleData name="REPLICATION"></SimpleData>
							<SimpleData name="DEPTH.m">1279</SimpleData>
							<SimpleData name="DATE.UTC"></SimpleData>
							<SimpleData name="GEAR">Multicore</SimpleData>
							<SimpleData name="GEAR2">Core</SimpleData>
							<SimpleData name="SEDIMENT.DEPTH.cm">10</SimpleData>
							<SimpleData name="AREA.m2"></SimpleData>
							<SimpleData name="ABUNDANCE.per.m2">8377300000000</SimpleData>
							<SimpleData name="DATA.TYPE.ABUNDANCE">Raw</SimpleData>
							<SimpleData name="CARBON.WT.mg.C.per.m2">149.6763526</SimpleData>
							<SimpleData name="FINAL.UNIT.TYPE">organic C</SimpleData>
							<SimpleData name="CONVERSION.FACTOR.from.Rowe.1983">*1</SimpleData>
							<SimpleData name="FINAL.BIOMASS..mg.C.per.m2">149.6763526</SimpleData>
							<SimpleData name="REFERENCE">Danovaro et al 2008</SimpleData>
							<SimpleData name="PROVIDER">Roberto Danovaro</SimpleData>
							<SimpleData name="BODY.OF.WATER">Arctic</SimpleData>
							<SimpleData name="REGION">Arctic</SimpleData>
							<SimpleData name="OCEAN.SEA">Arctic</SimpleData>
							<SimpleData name="HABITAT">Continental Slope</SimpleData>
							<SimpleData name="COMMENTS"></SimpleData>
						</SchemaData>
					</ExtendedData>
					<Point>
						<coordinates>6.092833333,79.13333333,0</coordinates>
					</Point>
				</Placemark>
				<Placemark>
					<styleUrl>#m_ylw-pushpin</styleUrl>
					<ExtendedData>
						<SchemaData schemaUrl="#data">
							<SimpleData name="CATEGORY">bacteria</SimpleData>
							<SimpleData name="STATION"></SimpleData>
							<SimpleData name="REPLICATION"></SimpleData>
							<SimpleData name="DEPTH.m">1091</SimpleData>
							<SimpleData name="DATE.UTC"></SimpleData>
							<SimpleData name="GEAR">Box Core</SimpleData>
							<SimpleData name="GEAR2">Core</SimpleData>
							<SimpleData name="SEDIMENT.DEPTH.cm">10</SimpleData>
							<SimpleData name="AREA.m2"></SimpleData>
							<SimpleData name="ABUNDANCE.per.m2">15770000000000</SimpleData>
							<SimpleData name="DATA.TYPE.ABUNDANCE">Raw</SimpleData>
							<SimpleData name="CARBON.WT.mg.C.per.m2">340.8776681</SimpleData>
							<SimpleData name="FINAL.UNIT.TYPE">organic C</SimpleData>
							<SimpleData name="CONVERSION.FACTOR.from.Rowe.1983">*1</SimpleData>
							<SimpleData name="FINAL.BIOMASS..mg.C.per.m2">340.8776681</SimpleData>
							<SimpleData name="REFERENCE">Danovaro et al 2008</SimpleData>
							<SimpleData name="PROVIDER">Roberto Danovaro</SimpleData>
							<SimpleData name="BODY.OF.WATER">NE Atlantic</SimpleData>
							<SimpleData name="REGION">NE Atlantic</SimpleData>
							<SimpleData name="OCEAN.SEA">Atlantic</SimpleData>
							<SimpleData name="HABITAT">Continental Slope</SimpleData>
							<SimpleData name="COMMENTS"></SimpleData>
						</SchemaData>
					</ExtendedData>
					<Point>
						<coordinates>-15.7661,55.4518,0</coordinates>
					</Point>
				</Placemark>
				<Placemark>
					<styleUrl>#m_ylw-pushpin</styleUrl>
					<ExtendedData>
						<SchemaData schemaUrl="#data">
							<SimpleData name="CATEGORY">bacteria</SimpleData>
							<SimpleData name="STATION"></SimpleData>
							<SimpleData name="REPLICATION"></SimpleData>
							<SimpleData name="DEPTH.m">1091</SimpleData>
							<SimpleData name="DATE.UTC"></SimpleData>
							<SimpleData name="GEAR">Box Core</SimpleData>
							<SimpleData name="GEAR2">Core</SimpleData>
							<SimpleData name="SEDIMENT.DEPTH.cm">10</SimpleData>
							<SimpleData name="AREA.m2"></SimpleData>
							<SimpleData name="ABUNDANCE.per.m2">17379800000000</SimpleData>
							<SimpleData name="DATA.TYPE.ABUNDANCE">Raw</SimpleData>
							<SimpleData name="CARBON.WT.mg.C.per.m2">386.7702291</SimpleData>
							<SimpleData name="FINAL.UNIT.TYPE">organic C</SimpleData>
							<SimpleData name="CONVERSION.FACTOR.from.Rowe.1983">*1</SimpleData>
							<SimpleData name="FINAL.BIOMASS..mg.C.per.m2">386.7702291</SimpleData>
							<SimpleData name="REFERENCE">Danovaro et al 2008</SimpleData>
							<SimpleData name="PROVIDER">Roberto Danovaro</SimpleData>
							<SimpleData name="BODY.OF.WATER">NE Atlantic</SimpleData>
							<SimpleData name="REGION">NE Atlantic</SimpleData>
							<SimpleData name="OCEAN.SEA">Atlantic</SimpleData>
							<SimpleData name="HABITAT">Continental Slope</SimpleData>
							<SimpleData name="COMMENTS"></SimpleData>
						</SchemaData>
					</ExtendedData>
					<Point>
						<coordinates>-15.7661,55.4518,0</coordinates>
					</Point>
				</Placemark>
				<Placemark>
					<styleUrl>#m_ylw-pushpin</styleUrl>
					<ExtendedData>
						<SchemaData schemaUrl="#data">
							<SimpleData name="CATEGORY">bacteria</SimpleData>
							<SimpleData name="STATION"></SimpleData>
							<SimpleData name="REPLICATION"></SimpleData>
							<SimpleData name="DEPTH.m">1091</SimpleData>
							<SimpleData name="DATE.UTC"></SimpleData>
							<SimpleData name="GEAR">Box Core</SimpleData>
							<SimpleData name="GEAR2">Core</SimpleData>
							<SimpleData name="SEDIMENT.DEPTH.cm">10</SimpleData>
							<SimpleData name="AREA.m2"></SimpleData>
							<SimpleData name="ABUNDANCE.per.m2">14160200000000</SimpleData>
							<SimpleData name="DATA.TYPE.ABUNDANCE">Raw</SimpleData>
							<SimpleData name="CARBON.WT.mg.C.per.m2">294.9851071</SimpleData>
							<SimpleData name="FINAL.UNIT.TYPE">organic C</SimpleData>
							<SimpleData name="CONVERSION.FACTOR.from.Rowe.1983">*1</SimpleData>
							<SimpleData name="FINAL.BIOMASS..mg.C.per.m2">294.9851071</SimpleData>
							<SimpleData name="REFERENCE">Danovaro et al 2008</SimpleData>
							<SimpleData name="PROVIDER">Roberto Danovaro</SimpleData>
							<SimpleData name="BODY.OF.WATER">NE Atlantic</SimpleData>
							<SimpleData name="REGION">NE Atlantic</SimpleData>
							<SimpleData name="OCEAN.SEA">Atlantic</SimpleData>
							<SimpleData name="HABITAT">Continental Slope</SimpleData>
							<SimpleData name="COMMENTS"></SimpleData>
						</SchemaData>
					</ExtendedData>
					<Point>
						<coordinates>-15.7661,55.4518,0</coordinates>
					</Point>
				</Placemark>
				<Placemark>
					<styleUrl>#m_ylw-pushpin</styleUrl>
					<ExtendedData>
						<SchemaData schemaUrl="#data">
							<SimpleData name="CATEGORY">bacteria</SimpleData>
							<SimpleData name="STATION"></SimpleData>
							<SimpleData name="REPLICATION"></SimpleData>
							<SimpleData name="DEPTH.m">469</SimpleData>
							<SimpleData name="DATE.UTC"></SimpleData>
							<SimpleData name="GEAR">Box Core</SimpleData>
							<SimpleData name="GEAR2">Core</SimpleData>
							<SimpleData name="SEDIMENT.DEPTH.cm">10</SimpleData>
							<SimpleData name="AREA.m2"></SimpleData>
							<SimpleData name="ABUNDANCE.per.m2">4765240000000</SimpleData>
							<SimpleData name="DATA.TYPE.ABUNDANCE">Raw</SimpleData>
							<SimpleData name="CARBON.WT.mg.C.per.m2">92.99805556</SimpleData>
							<SimpleData name="FINAL.UNIT.TYPE">organic C</SimpleData>
							<SimpleData name="CONVERSION.FACTOR.from.Rowe.1983">*1</SimpleData>
							<SimpleData name="FINAL.BIOMASS..mg.C.per.m2">92.99805556</SimpleData>
							<SimpleData name="REFERENCE">Danovaro et al 2008</SimpleData>
							<SimpleData name="PROVIDER">Roberto Danovaro</SimpleData>
							<SimpleData name="BODY.OF.WATER">NE Atlantic</SimpleData>
							<SimpleData name="REGION">NE Atlantic</SimpleData>
							<SimpleData name="OCEAN.SEA">Atlantic</SimpleData>
							<SimpleData name="HABITAT">Continental Slope</SimpleData>
							<SimpleData name="COMMENTS"></SimpleData>
						</SchemaData>
					</ExtendedData>
					<Point>
						<coordinates>-15.9333,55.65,0</coordinates>
					</Point>
				</Placemark>
				<Placemark>
					<styleUrl>#m_ylw-pushpin</styleUrl>
					<ExtendedData>
						<SchemaData schemaUrl="#data">
							<SimpleData name="CATEGORY">bacteria</SimpleData>
							<SimpleData name="STATION"></SimpleData>
							<SimpleData name="REPLICATION"></SimpleData>
							<SimpleData name="DEPTH.m">469</SimpleData>
							<SimpleData name="DATE.UTC"></SimpleData>
							<SimpleData name="GEAR">Box Core</SimpleData>
							<SimpleData name="GEAR2">Core</SimpleData>
							<SimpleData name="SEDIMENT.DEPTH.cm">10</SimpleData>
							<SimpleData name="AREA.m2"></SimpleData>
							<SimpleData name="ABUNDANCE.per.m2">5178100000000</SimpleData>
							<SimpleData name="DATA.TYPE.ABUNDANCE">Raw</SimpleData>
							<SimpleData name="CARBON.WT.mg.C.per.m2">111.6898904</SimpleData>
							<SimpleData name="FINAL.UNIT.TYPE">organic C</SimpleData>
							<SimpleData name="CONVERSION.FACTOR.from.Rowe.1983">*1</SimpleData>
							<SimpleData name="FINAL.BIOMASS..mg.C.per.m2">111.6898904</SimpleData>
							<SimpleData name="REFERENCE">Danovaro et al 2008</SimpleData>
							<SimpleData name="PROVIDER">Roberto Danovaro</SimpleData>
							<SimpleData name="BODY.OF.WATER">NE Atlantic</SimpleData>
							<SimpleData name="REGION">NE Atlantic</SimpleData>
							<SimpleData name="OCEAN.SEA">Atlantic</SimpleData>
							<SimpleData name="HABITAT">Continental Slope</SimpleData>
							<SimpleData name="COMMENTS"></SimpleData>
						</SchemaData>
					</ExtendedData>
					<Point>
						<coordinates>-15.9333,55.65,0</coordinates>
					</Point>
				</Placemark>
				<Placemark>
					<styleUrl>#m_ylw-pushpin</styleUrl>
					<ExtendedData>
						<SchemaData schemaUrl="#data">
							<SimpleData name="CATEGORY">bacteria</SimpleData>
							<SimpleData name="STATION"></SimpleData>
							<SimpleData name="REPLICATION"></SimpleData>
							<SimpleData name="DEPTH.m">469</SimpleData>
							<SimpleData name="DATE.UTC"></SimpleData>
							<SimpleData name="GEAR">Box Core</SimpleData>
							<SimpleData name="GEAR2">Core</SimpleData>
							<SimpleData name="SEDIMENT.DEPTH.cm">10</SimpleData>
							<SimpleData name="AREA.m2"></SimpleData>
							<SimpleData name="ABUNDANCE.per.m2">4352390000000</SimpleData>
							<SimpleData name="DATA.TYPE.ABUNDANCE">Raw</SimpleData>
							<SimpleData name="CARBON.WT.mg.C.per.m2">74.30622074</SimpleData>
							<SimpleData name="FINAL.UNIT.TYPE">organic C</SimpleData>
							<SimpleData name="CONVERSION.FACTOR.from.Rowe.1983">*1</SimpleData>
							<SimpleData name="FINAL.BIOMASS..mg.C.per.m2">74.30622074</SimpleData>
							<SimpleData name="REFERENCE">Danovaro et al 2008</SimpleData>
							<SimpleData name="PROVIDER">Roberto Danovaro</SimpleData>
							<SimpleData name="BODY.OF.WATER">NE Atlantic</SimpleData>
							<SimpleData name="REGION">NE Atlantic</SimpleData>
							<SimpleData name="OCEAN.SEA">Atlantic</SimpleData>
							<SimpleData name="HABITAT">Continental Slope</SimpleData>
							<SimpleData name="COMMENTS"></SimpleData>
						</SchemaData>
					</ExtendedData>
					<Point>
						<coordinates>-15.9333,55.65,0</coordinates>
					</Point>
				</Placemark>
				<Placemark>
					<styleUrl>#m_ylw-pushpin</styleUrl>
					<ExtendedData>
						<SchemaData schemaUrl="#data">
							<SimpleData name="CATEGORY">bacteria</SimpleData>
							<SimpleData name="STATION"></SimpleData>
							<SimpleData name="REPLICATION"></SimpleData>
							<SimpleData name="DEPTH.m">1488</SimpleData>
							<SimpleData name="DATE.UTC"></SimpleData>
							<SimpleData name="GEAR">Box Core</SimpleData>
							<SimpleData name="GEAR2">Core</SimpleData>
							<SimpleData name="SEDIMENT.DEPTH.cm">10</SimpleData>
							<SimpleData name="AREA.m2"></SimpleData>
							<SimpleData name="ABUNDANCE.per.m2">2492660000000</SimpleData>
							<SimpleData name="DATA.TYPE.ABUNDANCE">Raw</SimpleData>
							<SimpleData name="CARBON.WT.mg.C.per.m2">47.15162558</SimpleData>
							<SimpleData name="FINAL.UNIT.TYPE">organic C</SimpleData>
							<SimpleData name="CONVERSION.FACTOR.from.Rowe.1983">*1</SimpleData>
							<SimpleData name="FINAL.BIOMASS..mg.C.per.m2">47.15162558</SimpleData>
							<SimpleData name="REFERENCE">Danovaro et al 2008</SimpleData>
							<SimpleData name="PROVIDER">Roberto Danovaro</SimpleData>
							<SimpleData name="BODY.OF.WATER">NE Atlantic</SimpleData>
							<SimpleData name="REGION">NE Atlantic</SimpleData>
							<SimpleData name="OCEAN.SEA">Atlantic</SimpleData>
							<SimpleData name="HABITAT">Continental Slope</SimpleData>
							<SimpleData name="COMMENTS"></SimpleData>
						</SchemaData>
					</ExtendedData>
					<Point>
						<coordinates>-15.6531,55.37346667000001,0</coordinates>
					</Point>
				</Placemark>
				<Placemark>
					<styleUrl>#m_ylw-pushpin</styleUrl>
					<ExtendedData>
						<SchemaData schemaUrl="#data">
							<SimpleData name="CATEGORY">bacteria</SimpleData>
							<SimpleData name="STATION"></SimpleData>
							<SimpleData name="REPLICATION"></SimpleData>
							<SimpleData name="DEPTH.m">1488</SimpleData>
							<SimpleData name="DATE.UTC"></SimpleData>
							<SimpleData name="GEAR">Box Core</SimpleData>
							<SimpleData name="GEAR2">Core</SimpleData>
							<SimpleData name="SEDIMENT.DEPTH.cm">10</SimpleData>
							<SimpleData name="AREA.m2"></SimpleData>
							<SimpleData name="ABUNDANCE.per.m2">2608310000000</SimpleData>
							<SimpleData name="DATA.TYPE.ABUNDANCE">Raw</SimpleData>
							<SimpleData name="CARBON.WT.mg.C.per.m2">52.53728864</SimpleData>
							<SimpleData name="FINAL.UNIT.TYPE">organic C</SimpleData>
							<SimpleData name="CONVERSION.FACTOR.from.Rowe.1983">*1</SimpleData>
							<SimpleData name="FINAL.BIOMASS..mg.C.per.m2">52.53728864</SimpleData>
							<SimpleData name="REFERENCE">Danovaro et al 2008</SimpleData>
							<SimpleData name="PROVIDER">Roberto Danovaro</SimpleData>
							<SimpleData name="BODY.OF.WATER">NE Atlantic</SimpleData>
							<SimpleData name="REGION">NE Atlantic</SimpleData>
							<SimpleData name="OCEAN.SEA">Atlantic</SimpleData>
							<SimpleData name="HABITAT">Continental Slope</SimpleData>
							<SimpleData name="COMMENTS"></SimpleData>
						</SchemaData>
					</ExtendedData>
					<Point>
						<coordinates>-15.6531,55.37346667000001,0</coordinates>
					</Point>
				</Placemark>
				<Placemark>
					<styleUrl>#m_ylw-pushpin</styleUrl>
					<ExtendedData>
						<SchemaData schemaUrl="#data">
							<SimpleData name="CATEGORY">bacteria</SimpleData>
							<SimpleData name="STATION"></SimpleData>
							<SimpleData name="REPLICATION"></SimpleData>
							<SimpleData name="DEPTH.m">1488</SimpleData>
							<SimpleData name="DATE.UTC"></SimpleData>
							<SimpleData name="GEAR">Box Core</SimpleData>
							<SimpleData name="GEAR2">Core</SimpleData>
							<SimpleData name="SEDIMENT.DEPTH.cm">10</SimpleData>
							<SimpleData name="AREA.m2"></SimpleData>
							<SimpleData name="ABUNDANCE.per.m2">2377010000000</SimpleData>
							<SimpleData name="DATA.TYPE.ABUNDANCE">Raw</SimpleData>
							<SimpleData name="CARBON.WT.mg.C.per.m2">41.76596253</SimpleData>
							<SimpleData name="FINAL.UNIT.TYPE">organic C</SimpleData>
							<SimpleData name="CONVERSION.FACTOR.from.Rowe.1983">*1</SimpleData>
							<SimpleData name="FINAL.BIOMASS..mg.C.per.m2">41.76596253</SimpleData>
							<SimpleData name="REFERENCE">Danovaro et al 2008</SimpleData>
							<SimpleData name="PROVIDER">Roberto Danovaro</SimpleData>
							<SimpleData name="BODY.OF.WATER">NE Atlantic</SimpleData>
							<SimpleData name="REGION">NE Atlantic</SimpleData>
							<SimpleData name="OCEAN.SEA">Atlantic</SimpleData>
							<SimpleData name="HABITAT">Continental Slope</SimpleData>
							<SimpleData name="COMMENTS"></SimpleData>
						</SchemaData>
					</ExtendedData>
					<Point>
						<coordinates>-15.6531,55.37346667000001,0</coordinates>
					</Point>
				</Placemark>
				<Placemark>
					<styleUrl>#m_ylw-pushpin</styleUrl>
					<ExtendedData>
						<SchemaData schemaUrl="#data">
							<SimpleData name="CATEGORY">bacteria</SimpleData>
							<SimpleData name="STATION"></SimpleData>
							<SimpleData name="REPLICATION"></SimpleData>
							<SimpleData name="DEPTH.m">1958</SimpleData>
							<SimpleData name="DATE.UTC"></SimpleData>
							<SimpleData name="GEAR">Box Core</SimpleData>
							<SimpleData name="GEAR2">Core</SimpleData>
							<SimpleData name="SEDIMENT.DEPTH.cm">10</SimpleData>
							<SimpleData name="AREA.m2"></SimpleData>
							<SimpleData name="ABUNDANCE.per.m2">5050440000000</SimpleData>
							<SimpleData name="DATA.TYPE.ABUNDANCE">Raw</SimpleData>
							<SimpleData name="CARBON.WT.mg.C.per.m2">88.96519051</SimpleData>
							<SimpleData name="FINAL.UNIT.TYPE">organic C</SimpleData>
							<SimpleData name="CONVERSION.FACTOR.from.Rowe.1983">*1</SimpleData>
							<SimpleData name="FINAL.BIOMASS..mg.C.per.m2">88.96519051</SimpleData>
							<SimpleData name="REFERENCE">Danovaro et al 2008</SimpleData>
							<SimpleData name="PROVIDER">Roberto Danovaro</SimpleData>
							<SimpleData name="BODY.OF.WATER">NE Atlantic</SimpleData>
							<SimpleData name="REGION">NE Atlantic</SimpleData>
							<SimpleData name="OCEAN.SEA">Atlantic</SimpleData>
							<SimpleData name="HABITAT">Continental Slope</SimpleData>
							<SimpleData name="COMMENTS"></SimpleData>
						</SchemaData>
					</ExtendedData>
					<Point>
						<coordinates>-15.7793,55.20755,0</coordinates>
					</Point>
				</Placemark>
				<Placemark>
					<styleUrl>#m_ylw-pushpin</styleUrl>
					<ExtendedData>
						<SchemaData schemaUrl="#data">
							<SimpleData name="CATEGORY">bacteria</SimpleData>
							<SimpleData name="STATION"></SimpleData>
							<SimpleData name="REPLICATION"></SimpleData>
							<SimpleData name="DEPTH.m">1958</SimpleData>
							<SimpleData name="DATE.UTC"></SimpleData>
							<SimpleData name="GEAR">Box Core</SimpleData>
							<SimpleData name="GEAR2">Core</SimpleData>
							<SimpleData name="SEDIMENT.DEPTH.cm">10</SimpleData>
							<SimpleData name="AREA.m2"></SimpleData>
							<SimpleData name="ABUNDANCE.per.m2">4666640000000</SimpleData>
							<SimpleData name="DATA.TYPE.ABUNDANCE">Raw</SimpleData>
							<SimpleData name="CARBON.WT.mg.C.per.m2">74.82868357</SimpleData>
							<SimpleData name="FINAL.UNIT.TYPE">organic C</SimpleData>
							<SimpleData name="CONVERSION.FACTOR.from.Rowe.1983">*1</SimpleData>
							<SimpleData name="FINAL.BIOMASS..mg.C.per.m2">74.82868357</SimpleData>
							<SimpleData name="REFERENCE">Danovaro et al 2008</SimpleData>
							<SimpleData name="PROVIDER">Roberto Danovaro</SimpleData>
							<SimpleData name="BODY.OF.WATER">NE Atlantic</SimpleData>
							<SimpleData name="REGION">NE Atlantic</SimpleData>
							<SimpleData name="OCEAN.SEA">Atlantic</SimpleData>
							<SimpleData name="HABITAT">Continental Slope</SimpleData>
							<SimpleData name="COMMENTS"></SimpleData>
						</SchemaData>
					</ExtendedData>
					<Point>
						<coordinates>-15.7793,55.20755,0</coordinates>
					</Point>
				</Placemark>
				<Placemark>
					<styleUrl>#m_ylw-pushpin</styleUrl>
					<ExtendedData>
						<SchemaData schemaUrl="#data">
							<SimpleData name="CATEGORY">bacteria</SimpleData>
							<SimpleData name="STATION"></SimpleData>
							<SimpleData name="REPLICATION"></SimpleData>
							<SimpleData name="DEPTH.m">2459</SimpleData>
							<SimpleData name="DATE.UTC"></SimpleData>
							<SimpleData name="GEAR">Box Core</SimpleData>
							<SimpleData name="GEAR2">Core</SimpleData>
							<SimpleData name="SEDIMENT.DEPTH.cm">10</SimpleData>
							<SimpleData name="AREA.m2"></SimpleData>
							<SimpleData name="ABUNDANCE.per.m2">4617190000000</SimpleData>
							<SimpleData name="DATA.TYPE.ABUNDANCE">Raw</SimpleData>
							<SimpleData name="CARBON.WT.mg.C.per.m2">97.43274</SimpleData>
							<SimpleData name="FINAL.UNIT.TYPE">organic C</SimpleData>
							<SimpleData name="CONVERSION.FACTOR.from.Rowe.1983">*1</SimpleData>
							<SimpleData name="FINAL.BIOMASS..mg.C.per.m2">97.43274</SimpleData>
							<SimpleData name="REFERENCE">Danovaro et al 2008</SimpleData>
							<SimpleData name="PROVIDER">Roberto Danovaro</SimpleData>
							<SimpleData name="BODY.OF.WATER">NE Atlantic</SimpleData>
							<SimpleData name="REGION">NE Atlantic</SimpleData>
							<SimpleData name="OCEAN.SEA">Atlantic</SimpleData>
							<SimpleData name="HABITAT">Continental Slope</SimpleData>
							<SimpleData name="COMMENTS"></SimpleData>
						</SchemaData>
					</ExtendedData>
					<Point>
						<coordinates>-15.7722,55.08201667,0</coordinates>
					</Point>
				</Placemark>
				<Placemark>
					<styleUrl>#m_ylw-pushpin</styleUrl>
					<ExtendedData>
						<SchemaData schemaUrl="#data">
							<SimpleData name="CATEGORY">bacteria</SimpleData>
							<SimpleData name="STATION"></SimpleData>
							<SimpleData name="REPLICATION"></SimpleData>
							<SimpleData name="DEPTH.m">2459</SimpleData>
							<SimpleData name="DATE.UTC"></SimpleData>
							<SimpleData name="GEAR">Box Core</SimpleData>
							<SimpleData name="GEAR2">Core</SimpleData>
							<SimpleData name="SEDIMENT.DEPTH.cm">10</SimpleData>
							<SimpleData name="AREA.m2"></SimpleData>
							<SimpleData name="ABUNDANCE.per.m2">5094400000000</SimpleData>
							<SimpleData name="DATA.TYPE.ABUNDANCE">Raw</SimpleData>
							<SimpleData name="CARBON.WT.mg.C.per.m2">115.1669619</SimpleData>
							<SimpleData name="FINAL.UNIT.TYPE">organic C</SimpleData>
							<SimpleData name="CONVERSION.FACTOR.from.Rowe.1983">*1</SimpleData>
							<SimpleData name="FINAL.BIOMASS..mg.C.per.m2">115.1669619</SimpleData>
							<SimpleData name="REFERENCE">Danovaro et al 2008</SimpleData>
							<SimpleData name="PROVIDER">Roberto Danovaro</SimpleData>
							<SimpleData name="BODY.OF.WATER">NE Atlantic</SimpleData>
							<SimpleData name="REGION">NE Atlantic</SimpleData>
							<SimpleData name="OCEAN.SEA">Atlantic</SimpleData>
							<SimpleData name="HABITAT">Continental Slope</SimpleData>
							<SimpleData name="COMMENTS"></SimpleData>
						</SchemaData>
					</ExtendedData>
					<Point>
						<coordinates>-15.7722,55.08201667,0</coordinates>
					</Point>
				</Placemark>
				<Placemark>
					<styleUrl>#m_ylw-pushpin</styleUrl>
					<ExtendedData>
						<SchemaData schemaUrl="#data">
							<SimpleData name="CATEGORY">bacteria</SimpleData>
							<SimpleData name="STATION"></SimpleData>
							<SimpleData name="REPLICATION"></SimpleData>
							<SimpleData name="DEPTH.m">2459</SimpleData>
							<SimpleData name="DATE.UTC"></SimpleData>
							<SimpleData name="GEAR">Box Core</SimpleData>
							<SimpleData name="GEAR2">Core</SimpleData>
							<SimpleData name="SEDIMENT.DEPTH.cm">10</SimpleData>
							<SimpleData name="AREA.m2"></SimpleData>
							<SimpleData name="ABUNDANCE.per.m2">4139980000000</SimpleData>
							<SimpleData name="DATA.TYPE.ABUNDANCE">Raw</SimpleData>
							<SimpleData name="CARBON.WT.mg.C.per.m2">79.69851807</SimpleData>
							<SimpleData name="FINAL.UNIT.TYPE">organic C</SimpleData>
							<SimpleData name="CONVERSION.FACTOR.from.Rowe.1983">*1</SimpleData>
							<SimpleData name="FINAL.BIOMASS..mg.C.per.m2">79.69851807</SimpleData>
							<SimpleData name="REFERENCE">Danovaro et al 2008</SimpleData>
							<SimpleData name="PROVIDER">Roberto Danovaro</SimpleData>
							<SimpleData name="BODY.OF.WATER">NE Atlantic</SimpleData>
							<SimpleData name="REGION">NE Atlantic</SimpleData>
							<SimpleData name="OCEAN.SEA">Atlantic</SimpleData>
							<SimpleData name="HABITAT">Continental Slope</SimpleData>
							<SimpleData name="COMMENTS"></SimpleData>
						</SchemaData>
					</ExtendedData>
					<Point>
						<coordinates>-15.7722,55.08201667,0</coordinates>
					</Point>
				</Placemark>
				<Placemark>
					<styleUrl>#m_ylw-pushpin</styleUrl>
					<ExtendedData>
						<SchemaData schemaUrl="#data">
							<SimpleData name="CATEGORY">bacteria</SimpleData>
							<SimpleData name="STATION"></SimpleData>
							<SimpleData name="REPLICATION"></SimpleData>
							<SimpleData name="DEPTH.m">4513</SimpleData>
							<SimpleData name="DATE.UTC"></SimpleData>
							<SimpleData name="GEAR">Box Core</SimpleData>
							<SimpleData name="GEAR2">Core</SimpleData>
							<SimpleData name="SEDIMENT.DEPTH.cm">10</SimpleData>
							<SimpleData name="AREA.m2"></SimpleData>
							<SimpleData name="ABUNDANCE.per.m2">3690840000000</SimpleData>
							<SimpleData name="DATA.TYPE.ABUNDANCE">Raw</SimpleData>
							<SimpleData name="CARBON.WT.mg.C.per.m2">65.66312419</SimpleData>
							<SimpleData name="FINAL.UNIT.TYPE">organic C</SimpleData>
							<SimpleData name="CONVERSION.FACTOR.from.Rowe.1983">*1</SimpleData>
							<SimpleData name="FINAL.BIOMASS..mg.C.per.m2">65.66312419</SimpleData>
							<SimpleData name="REFERENCE">Danovaro et al 2008</SimpleData>
							<SimpleData name="PROVIDER">Roberto Danovaro</SimpleData>
							<SimpleData name="BODY.OF.WATER">NE Atlantic</SimpleData>
							<SimpleData name="REGION">NE Atlantic</SimpleData>
							<SimpleData name="OCEAN.SEA">Atlantic</SimpleData>
							<SimpleData name="HABITAT">Continental Slope</SimpleData>
							<SimpleData name="COMMENTS"></SimpleData>
						</SchemaData>
					</ExtendedData>
					<Point>
						<coordinates>-9.974,38.3535,0</coordinates>
					</Point>
				</Placemark>
				<Placemark>
					<styleUrl>#m_ylw-pushpin</styleUrl>
					<ExtendedData>
						<SchemaData schemaUrl="#data">
							<SimpleData name="CATEGORY">bacteria</SimpleData>
							<SimpleData name="STATION"></SimpleData>
							<SimpleData name="REPLICATION"></SimpleData>
							<SimpleData name="DEPTH.m">4513</SimpleData>
							<SimpleData name="DATE.UTC"></SimpleData>
							<SimpleData name="GEAR">Box Core</SimpleData>
							<SimpleData name="GEAR2">Core</SimpleData>
							<SimpleData name="SEDIMENT.DEPTH.cm">10</SimpleData>
							<SimpleData name="AREA.m2"></SimpleData>
							<SimpleData name="ABUNDANCE.per.m2">4120170000000</SimpleData>
							<SimpleData name="DATA.TYPE.ABUNDANCE">Raw</SimpleData>
							<SimpleData name="CARBON.WT.mg.C.per.m2">73.77596183</SimpleData>
							<SimpleData name="FINAL.UNIT.TYPE">organic C</SimpleData>
							<SimpleData name="CONVERSION.FACTOR.from.Rowe.1983">*1</SimpleData>
							<SimpleData name="FINAL.BIOMASS..mg.C.per.m2">73.77596183</SimpleData>
							<SimpleData name="REFERENCE">Danovaro et al 2008</SimpleData>
							<SimpleData name="PROVIDER">Roberto Danovaro</SimpleData>
							<SimpleData name="BODY.OF.WATER">NE Atlantic</SimpleData>
							<SimpleData name="REGION">NE Atlantic</SimpleData>
							<SimpleData name="OCEAN.SEA">Atlantic</SimpleData>
							<SimpleData name="HABITAT">Continental Slope</SimpleData>
							<SimpleData name="COMMENTS"></SimpleData>
						</SchemaData>
					</ExtendedData>
					<Point>
						<coordinates>-9.974,38.3535,0</coordinates>
					</Point>
				</Placemark>
				<Placemark>
					<styleUrl>#m_ylw-pushpin</styleUrl>
					<ExtendedData>
						<SchemaData schemaUrl="#data">
							<SimpleData name="CATEGORY">bacteria</SimpleData>
							<SimpleData name="STATION"></SimpleData>
							<SimpleData name="REPLICATION"></SimpleData>
							<SimpleData name="DEPTH.m">4513</SimpleData>
							<SimpleData name="DATE.UTC"></SimpleData>
							<SimpleData name="GEAR">Box Core</SimpleData>
							<SimpleData name="GEAR2">Core</SimpleData>
							<SimpleData name="SEDIMENT.DEPTH.cm">10</SimpleData>
							<SimpleData name="AREA.m2"></SimpleData>
							<SimpleData name="ABUNDANCE.per.m2">3261510000000</SimpleData>
							<SimpleData name="DATA.TYPE.ABUNDANCE">Raw</SimpleData>
							<SimpleData name="CARBON.WT.mg.C.per.m2">57.55028656</SimpleData>
							<SimpleData name="FINAL.UNIT.TYPE">organic C</SimpleData>
							<SimpleData name="CONVERSION.FACTOR.from.Rowe.1983">*1</SimpleData>
							<SimpleData name="FINAL.BIOMASS..mg.C.per.m2">57.55028656</SimpleData>
							<SimpleData name="REFERENCE">Danovaro et al 2008</SimpleData>
							<SimpleData name="PROVIDER">Roberto Danovaro</SimpleData>
							<SimpleData name="BODY.OF.WATER">NE Atlantic</SimpleData>
							<SimpleData name="REGION">NE Atlantic</SimpleData>
							<SimpleData name="OCEAN.SEA">Atlantic</SimpleData>
							<SimpleData name="HABITAT">Continental Slope</SimpleData>
							<SimpleData name="COMMENTS"></SimpleData>
						</SchemaData>
					</ExtendedData>
					<Point>
						<coordinates>-9.974,38.3535,0</coordinates>
					</Point>
				</Placemark>
				<Placemark>
					<styleUrl>#m_ylw-pushpin</styleUrl>
					<ExtendedData>
						<SchemaData schemaUrl="#data">
							<SimpleData name="CATEGORY">bacteria</SimpleData>
							<SimpleData name="STATION"></SimpleData>
							<SimpleData name="REPLICATION"></SimpleData>
							<SimpleData name="DEPTH.m">4340</SimpleData>
							<SimpleData name="DATE.UTC"></SimpleData>
							<SimpleData name="GEAR">Box Core</SimpleData>
							<SimpleData name="GEAR2">Core</SimpleData>
							<SimpleData name="SEDIMENT.DEPTH.cm">10</SimpleData>
							<SimpleData name="AREA.m2"></SimpleData>
							<SimpleData name="ABUNDANCE.per.m2">4513450000000</SimpleData>
							<SimpleData name="DATA.TYPE.ABUNDANCE">Raw</SimpleData>
							<SimpleData name="CARBON.WT.mg.C.per.m2">89.56543672</SimpleData>
							<SimpleData name="FINAL.UNIT.TYPE">organic C</SimpleData>
							<SimpleData name="CONVERSION.FACTOR.from.Rowe.1983">*1</SimpleData>
							<SimpleData name="FINAL.BIOMASS..mg.C.per.m2">89.56543672</SimpleData>
							<SimpleData name="REFERENCE">Danovaro et al 2008</SimpleData>
							<SimpleData name="PROVIDER">Roberto Danovaro</SimpleData>
							<SimpleData name="BODY.OF.WATER">NE Atlantic</SimpleData>
							<SimpleData name="REGION">NE Atlantic</SimpleData>
							<SimpleData name="OCEAN.SEA">Atlantic</SimpleData>
							<SimpleData name="HABITAT">Continental Slope</SimpleData>
							<SimpleData name="COMMENTS"></SimpleData>
						</SchemaData>
					</ExtendedData>
					<Point>
						<coordinates>-10.31933333,39.58316667,0</coordinates>
					</Point>
				</Placemark>
				<Placemark>
					<styleUrl>#m_ylw-pushpin</styleUrl>
					<ExtendedData>
						<SchemaData schemaUrl="#data">
							<SimpleData name="CATEGORY">bacteria</SimpleData>
							<SimpleData name="STATION"></SimpleData>
							<SimpleData name="REPLICATION"></SimpleData>
							<SimpleData name="DEPTH.m">4340</SimpleData>
							<SimpleData name="DATE.UTC"></SimpleData>
							<SimpleData name="GEAR">Box Core</SimpleData>
							<SimpleData name="GEAR2">Core</SimpleData>
							<SimpleData name="SEDIMENT.DEPTH.cm">10</SimpleData>
							<SimpleData name="AREA.m2"></SimpleData>
							<SimpleData name="ABUNDANCE.per.m2">4795410000000</SimpleData>
							<SimpleData name="DATA.TYPE.ABUNDANCE">Raw</SimpleData>
							<SimpleData name="CARBON.WT.mg.C.per.m2">98.08896255</SimpleData>
							<SimpleData name="FINAL.UNIT.TYPE">organic C</SimpleData>
							<SimpleData name="CONVERSION.FACTOR.from.Rowe.1983">*1</SimpleData>
							<SimpleData name="FINAL.BIOMASS..mg.C.per.m2">98.08896255</SimpleData>
							<SimpleData name="REFERENCE">Danovaro et al 2008</SimpleData>
							<SimpleData name="PROVIDER">Roberto Danovaro</SimpleData>
							<SimpleData name="BODY.OF.WATER">NE Atlantic</SimpleData>
							<SimpleData name="REGION">NE Atlantic</SimpleData>
							<SimpleData name="OCEAN.SEA">Atlantic</SimpleData>
							<SimpleData name="HABITAT">Continental Slope</SimpleData>
							<SimpleData name="COMMENTS"></SimpleData>
						</SchemaData>
					</ExtendedData>
					<Point>
						<coordinates>-10.31933333,39.58316667,0</coordinates>
					</Point>
				</Placemark>
				<Placemark>
					<styleUrl>#m_ylw-pushpin</styleUrl>
					<ExtendedData>
						<SchemaData schemaUrl="#data">
							<SimpleData name="CATEGORY">bacteria</SimpleData>
							<SimpleData name="STATION"></SimpleData>
							<SimpleData name="REPLICATION"></SimpleData>
							<SimpleData name="DEPTH.m">4340</SimpleData>
							<SimpleData name="DATE.UTC"></SimpleData>
							<SimpleData name="GEAR">Box Core</SimpleData>
							<SimpleData name="GEAR2">Core</SimpleData>
							<SimpleData name="SEDIMENT.DEPTH.cm">10</SimpleData>
							<SimpleData name="AREA.m2"></SimpleData>
							<SimpleData name="ABUNDANCE.per.m2">4231490000000</SimpleData>
							<SimpleData name="DATA.TYPE.ABUNDANCE">Raw</SimpleData>
							<SimpleData name="CARBON.WT.mg.C.per.m2">81.04191089</SimpleData>
							<SimpleData name="FINAL.UNIT.TYPE">organic C</SimpleData>
							<SimpleData name="CONVERSION.FACTOR.from.Rowe.1983">*1</SimpleData>
							<SimpleData name="FINAL.BIOMASS..mg.C.per.m2">81.04191089</SimpleData>
							<SimpleData name="REFERENCE">Danovaro et al 2008</SimpleData>
							<SimpleData name="PROVIDER">Roberto Danovaro</SimpleData>
							<SimpleData name="BODY.OF.WATER">NE Atlantic</SimpleData>
							<SimpleData name="REGION">NE Atlantic</SimpleData>
							<SimpleData name="OCEAN.SEA">Atlantic</SimpleData>
							<SimpleData name="HABITAT">Continental Slope</SimpleData>
							<SimpleData name="COMMENTS"></SimpleData>
						</SchemaData>
					</ExtendedData>
					<Point>
						<coordinates>-10.31933333,39.58316667,0</coordinates>
					</Point>
				</Placemark>
				<Placemark>
					<styleUrl>#m_ylw-pushpin</styleUrl>
					<ExtendedData>
						<SchemaData schemaUrl="#data">
							<SimpleData name="CATEGORY">bacteria</SimpleData>
							<SimpleData name="STATION"></SimpleData>
							<SimpleData name="REPLICATION"></SimpleData>
							<SimpleData name="DEPTH.m">3530</SimpleData>
							<SimpleData name="DATE.UTC"></SimpleData>
							<SimpleData name="GEAR">Box Core</SimpleData>
							<SimpleData name="GEAR2">Core</SimpleData>
							<SimpleData name="SEDIMENT.DEPTH.cm">10</SimpleData>
							<SimpleData name="AREA.m2"></SimpleData>
							<SimpleData name="ABUNDANCE.per.m2">1967370000000</SimpleData>
							<SimpleData name="DATA.TYPE.ABUNDANCE">Raw</SimpleData>
							<SimpleData name="CARBON.WT.mg.C.per.m2">39.68974762</SimpleData>
							<SimpleData name="FINAL.UNIT.TYPE">organic C</SimpleData>
							<SimpleData name="CONVERSION.FACTOR.from.Rowe.1983">*1</SimpleData>
							<SimpleData name="FINAL.BIOMASS..mg.C.per.m2">39.68974762</SimpleData>
							<SimpleData name="REFERENCE">Danovaro et al 2008</SimpleData>
							<SimpleData name="PROVIDER">Roberto Danovaro</SimpleData>
							<SimpleData name="BODY.OF.WATER">NE Atlantic</SimpleData>
							<SimpleData name="REGION">NE Atlantic</SimpleData>
							<SimpleData name="OCEAN.SEA">Atlantic</SimpleData>
							<SimpleData name="HABITAT">Continental Slope</SimpleData>
							<SimpleData name="COMMENTS"></SimpleData>
						</SchemaData>
					</ExtendedData>
					<Point>
						<coordinates>-9.9375,39.5,0</coordinates>
					</Point>
				</Placemark>
				<Placemark>
					<styleUrl>#m_ylw-pushpin</styleUrl>
					<ExtendedData>
						<SchemaData schemaUrl="#data">
							<SimpleData name="CATEGORY">bacteria</SimpleData>
							<SimpleData name="STATION"></SimpleData>
							<SimpleData name="REPLICATION"></SimpleData>
							<SimpleData name="DEPTH.m">3530</SimpleData>
							<SimpleData name="DATE.UTC"></SimpleData>
							<SimpleData name="GEAR">Box Core</SimpleData>
							<SimpleData name="GEAR2">Core</SimpleData>
							<SimpleData name="SEDIMENT.DEPTH.cm">10</SimpleData>
							<SimpleData name="AREA.m2"></SimpleData>
							<SimpleData name="ABUNDANCE.per.m2">2429990000000</SimpleData>
							<SimpleData name="DATA.TYPE.ABUNDANCE">Raw</SimpleData>
							<SimpleData name="CARBON.WT.mg.C.per.m2">43.00704545</SimpleData>
							<SimpleData name="FINAL.UNIT.TYPE">organic C</SimpleData>
							<SimpleData name="CONVERSION.FACTOR.from.Rowe.1983">*1</SimpleData>
							<SimpleData name="FINAL.BIOMASS..mg.C.per.m2">43.00704545</SimpleData>
							<SimpleData name="REFERENCE">Danovaro et al 2008</SimpleData>
							<SimpleData name="PROVIDER">Roberto Danovaro</SimpleData>
							<SimpleData name="BODY.OF.WATER">NE Atlantic</SimpleData>
							<SimpleData name="REGION">NE Atlantic</SimpleData>
							<SimpleData name="OCEAN.SEA">Atlantic</SimpleData>
							<SimpleData name="HABITAT">Continental Slope</SimpleData>
							<SimpleData name="COMMENTS"></SimpleData>
						</SchemaData>
					</ExtendedData>
					<Point>
						<coordinates>-9.9375,39.5,0</coordinates>
					</Point>
				</Placemark>
				<Placemark>
					<styleUrl>#m_ylw-pushpin</styleUrl>
					<ExtendedData>
						<SchemaData schemaUrl="#data">
							<SimpleData name="CATEGORY">bacteria</SimpleData>
							<SimpleData name="STATION"></SimpleData>
							<SimpleData name="REPLICATION"></SimpleData>
							<SimpleData name="DEPTH.m">3530</SimpleData>
							<SimpleData name="DATE.UTC"></SimpleData>
							<SimpleData name="GEAR">Box Core</SimpleData>
							<SimpleData name="GEAR2">Core</SimpleData>
							<SimpleData name="SEDIMENT.DEPTH.cm">10</SimpleData>
							<SimpleData name="AREA.m2"></SimpleData>
							<SimpleData name="ABUNDANCE.per.m2">1504740000000</SimpleData>
							<SimpleData name="DATA.TYPE.ABUNDANCE">Raw</SimpleData>
							<SimpleData name="CARBON.WT.mg.C.per.m2">36.37244979</SimpleData>
							<SimpleData name="FINAL.UNIT.TYPE">organic C</SimpleData>
							<SimpleData name="CONVERSION.FACTOR.from.Rowe.1983">*1</SimpleData>
							<SimpleData name="FINAL.BIOMASS..mg.C.per.m2">36.37244979</SimpleData>
							<SimpleData name="REFERENCE">Danovaro et al 2008</SimpleData>
							<SimpleData name="PROVIDER">Roberto Danovaro</SimpleData>
							<SimpleData name="BODY.OF.WATER">NE Atlantic</SimpleData>
							<SimpleData name="REGION">NE Atlantic</SimpleData>
							<SimpleData name="OCEAN.SEA">Atlantic</SimpleData>
							<SimpleData name="HABITAT">Continental Slope</SimpleData>
							<SimpleData name="COMMENTS"></SimpleData>
						</SchemaData>
					</ExtendedData>
					<Point>
						<coordinates>-9.9375,39.5,0</coordinates>
					</Point>
				</Placemark>
				<Placemark>
					<styleUrl>#m_ylw-pushpin</styleUrl>
					<ExtendedData>
						<SchemaData schemaUrl="#data">
							<SimpleData name="CATEGORY">bacteria</SimpleData>
							<SimpleData name="STATION"></SimpleData>
							<SimpleData name="REPLICATION"></SimpleData>
							<SimpleData name="DEPTH.m">740</SimpleData>
							<SimpleData name="DATE.UTC"></SimpleData>
							<SimpleData name="GEAR">Box Core</SimpleData>
							<SimpleData name="GEAR2">Core</SimpleData>
							<SimpleData name="SEDIMENT.DEPTH.cm">10</SimpleData>
							<SimpleData name="AREA.m2"></SimpleData>
							<SimpleData name="ABUNDANCE.per.m2">6918470000000</SimpleData>
							<SimpleData name="DATA.TYPE.ABUNDANCE">Raw</SimpleData>
							<SimpleData name="CARBON.WT.mg.C.per.m2">156.3913055</SimpleData>
							<SimpleData name="FINAL.UNIT.TYPE">organic C</SimpleData>
							<SimpleData name="CONVERSION.FACTOR.from.Rowe.1983">*1</SimpleData>
							<SimpleData name="FINAL.BIOMASS..mg.C.per.m2">156.3913055</SimpleData>
							<SimpleData name="REFERENCE">Danovaro et al 2008</SimpleData>
							<SimpleData name="PROVIDER">Roberto Danovaro</SimpleData>
							<SimpleData name="BODY.OF.WATER">NE Atlantic</SimpleData>
							<SimpleData name="REGION">NE Atlantic</SimpleData>
							<SimpleData name="OCEAN.SEA">Atlantic</SimpleData>
							<SimpleData name="HABITAT">Continental Slope</SimpleData>
							<SimpleData name="COMMENTS"></SimpleData>
						</SchemaData>
					</ExtendedData>
					<Point>
						<coordinates>-9.415166666999999,39.57483333,0</coordinates>
					</Point>
				</Placemark>
				<Placemark>
					<styleUrl>#m_ylw-pushpin</styleUrl>
					<ExtendedData>
						<SchemaData schemaUrl="#data">
							<SimpleData name="CATEGORY">bacteria</SimpleData>
							<SimpleData name="STATION"></SimpleData>
							<SimpleData name="REPLICATION"></SimpleData>
							<SimpleData name="DEPTH.m">740</SimpleData>
							<SimpleData name="DATE.UTC"></SimpleData>
							<SimpleData name="GEAR">Box Core</SimpleData>
							<SimpleData name="GEAR2">Core</SimpleData>
							<SimpleData name="SEDIMENT.DEPTH.cm">10</SimpleData>
							<SimpleData name="AREA.m2"></SimpleData>
							<SimpleData name="ABUNDANCE.per.m2">7411150000000</SimpleData>
							<SimpleData name="DATA.TYPE.ABUNDANCE">Raw</SimpleData>
							<SimpleData name="CARBON.WT.mg.C.per.m2">173.2861161</SimpleData>
							<SimpleData name="FINAL.UNIT.TYPE">organic C</SimpleData>
							<SimpleData name="CONVERSION.FACTOR.from.Rowe.1983">*1</SimpleData>
							<SimpleData name="FINAL.BIOMASS..mg.C.per.m2">173.2861161</SimpleData>
							<SimpleData name="REFERENCE">Danovaro et al 2008</SimpleData>
							<SimpleData name="PROVIDER">Roberto Danovaro</SimpleData>
							<SimpleData name="BODY.OF.WATER">NE Atlantic</SimpleData>
							<SimpleData name="REGION">NE Atlantic</SimpleData>
							<SimpleData name="OCEAN.SEA">Atlantic</SimpleData>
							<SimpleData name="HABITAT">Continental Slope</SimpleData>
							<SimpleData name="COMMENTS"></SimpleData>
						</SchemaData>
					</ExtendedData>
					<Point>
						<coordinates>-9.415166666999999,39.57483333,0</coordinates>
					</Point>
				</Placemark>
				<Placemark>
					<styleUrl>#m_ylw-pushpin</styleUrl>
					<ExtendedData>
						<SchemaData schemaUrl="#data">
							<SimpleData name="CATEGORY">bacteria</SimpleData>
							<SimpleData name="STATION"></SimpleData>
							<SimpleData name="REPLICATION"></SimpleData>
							<SimpleData name="DEPTH.m">740</SimpleData>
							<SimpleData name="DATE.UTC"></SimpleData>
							<SimpleData name="GEAR">Box Core</SimpleData>
							<SimpleData name="GEAR2">Core</SimpleData>
							<SimpleData name="SEDIMENT.DEPTH.cm">10</SimpleData>
							<SimpleData name="AREA.m2"></SimpleData>
							<SimpleData name="ABUNDANCE.per.m2">6425790000000</SimpleData>
							<SimpleData name="DATA.TYPE.ABUNDANCE">Raw</SimpleData>
							<SimpleData name="CARBON.WT.mg.C.per.m2">139.4964949</SimpleData>
							<SimpleData name="FINAL.UNIT.TYPE">organic C</SimpleData>
							<SimpleData name="CONVERSION.FACTOR.from.Rowe.1983">*1</SimpleData>
							<SimpleData name="FINAL.BIOMASS..mg.C.per.m2">139.4964949</SimpleData>
							<SimpleData name="REFERENCE">Danovaro et al 2008</SimpleData>
							<SimpleData name="PROVIDER">Roberto Danovaro</SimpleData>
							<SimpleData name="BODY.OF.WATER">NE Atlantic</SimpleData>
							<SimpleData name="REGION">NE Atlantic</SimpleData>
							<SimpleData name="OCEAN.SEA">Atlantic</SimpleData>
							<SimpleData name="HABITAT">Continental Slope</SimpleData>
							<SimpleData name="COMMENTS"></SimpleData>
						</SchemaData>
					</ExtendedData>
					<Point>
						<coordinates>-9.415166666999999,39.57483333,0</coordinates>
					</Point>
				</Placemark>
				<Placemark>
					<styleUrl>#m_ylw-pushpin</styleUrl>
					<ExtendedData>
						<SchemaData schemaUrl="#data">
							<SimpleData name="CATEGORY">bacteria</SimpleData>
							<SimpleData name="STATION"></SimpleData>
							<SimpleData name="REPLICATION"></SimpleData>
							<SimpleData name="DEPTH.m">4277</SimpleData>
							<SimpleData name="DATE.UTC"></SimpleData>
							<SimpleData name="GEAR">Box Core</SimpleData>
							<SimpleData name="GEAR2">Core</SimpleData>
							<SimpleData name="SEDIMENT.DEPTH.cm">10</SimpleData>
							<SimpleData name="AREA.m2"></SimpleData>
							<SimpleData name="ABUNDANCE.per.m2">4841680000000</SimpleData>
							<SimpleData name="DATA.TYPE.ABUNDANCE">Raw</SimpleData>
							<SimpleData name="CARBON.WT.mg.C.per.m2">104.9228773</SimpleData>
							<SimpleData name="FINAL.UNIT.TYPE">organic C</SimpleData>
							<SimpleData name="CONVERSION.FACTOR.from.Rowe.1983">*1</SimpleData>
							<SimpleData name="FINAL.BIOMASS..mg.C.per.m2">104.9228773</SimpleData>
							<SimpleData name="REFERENCE">Danovaro et al 2008</SimpleData>
							<SimpleData name="PROVIDER">Roberto Danovaro</SimpleData>
							<SimpleData name="BODY.OF.WATER">NE Atlantic</SimpleData>
							<SimpleData name="REGION">NE Atlantic</SimpleData>
							<SimpleData name="OCEAN.SEA">Atlantic</SimpleData>
							<SimpleData name="HABITAT">Continental Slope</SimpleData>
							<SimpleData name="COMMENTS"></SimpleData>
						</SchemaData>
					</ExtendedData>
					<Point>
						<coordinates>-10.36533333,40.07333333,0</coordinates>
					</Point>
				</Placemark>
				<Placemark>
					<styleUrl>#m_ylw-pushpin</styleUrl>
					<ExtendedData>
						<SchemaData schemaUrl="#data">
							<SimpleData name="CATEGORY">bacteria</SimpleData>
							<SimpleData name="STATION"></SimpleData>
							<SimpleData name="REPLICATION"></SimpleData>
							<SimpleData name="DEPTH.m">4277</SimpleData>
							<SimpleData name="DATE.UTC"></SimpleData>
							<SimpleData name="GEAR">Box Core</SimpleData>
							<SimpleData name="GEAR2">Core</SimpleData>
							<SimpleData name="SEDIMENT.DEPTH.cm">10</SimpleData>
							<SimpleData name="AREA.m2"></SimpleData>
							<SimpleData name="ABUNDANCE.per.m2">5183900000000</SimpleData>
							<SimpleData name="DATA.TYPE.ABUNDANCE">Raw</SimpleData>
							<SimpleData name="CARBON.WT.mg.C.per.m2">119.259444</SimpleData>
							<SimpleData name="FINAL.UNIT.TYPE">organic C</SimpleData>
							<SimpleData name="CONVERSION.FACTOR.from.Rowe.1983">*1</SimpleData>
							<SimpleData name="FINAL.BIOMASS..mg.C.per.m2">119.259444</SimpleData>
							<SimpleData name="REFERENCE">Danovaro et al 2008</SimpleData>
							<SimpleData name="PROVIDER">Roberto Danovaro</SimpleData>
							<SimpleData name="BODY.OF.WATER">NE Atlantic</SimpleData>
							<SimpleData name="REGION">NE Atlantic</SimpleData>
							<SimpleData name="OCEAN.SEA">Atlantic</SimpleData>
							<SimpleData name="HABITAT">Continental Slope</SimpleData>
							<SimpleData name="COMMENTS"></SimpleData>
						</SchemaData>
					</ExtendedData>
					<Point>
						<coordinates>-10.36533333,40.07333333,0</coordinates>
					</Point>
				</Placemark>
				<Placemark>
					<styleUrl>#m_ylw-pushpin</styleUrl>
					<ExtendedData>
						<SchemaData schemaUrl="#data">
							<SimpleData name="CATEGORY">bacteria</SimpleData>
							<SimpleData name="STATION"></SimpleData>
							<SimpleData name="REPLICATION"></SimpleData>
							<SimpleData name="DEPTH.m">4277</SimpleData>
							<SimpleData name="DATE.UTC"></SimpleData>
							<SimpleData name="GEAR">Box Core</SimpleData>
							<SimpleData name="GEAR2">Core</SimpleData>
							<SimpleData name="SEDIMENT.DEPTH.cm">10</SimpleData>
							<SimpleData name="AREA.m2"></SimpleData>
							<SimpleData name="ABUNDANCE.per.m2">4499470000000</SimpleData>
							<SimpleData name="DATA.TYPE.ABUNDANCE">Raw</SimpleData>
							<SimpleData name="CARBON.WT.mg.C.per.m2">90.58631064</SimpleData>
							<SimpleData name="FINAL.UNIT.TYPE">organic C</SimpleData>
							<SimpleData name="CONVERSION.FACTOR.from.Rowe.1983">*1</SimpleData>
							<SimpleData name="FINAL.BIOMASS..mg.C.per.m2">90.58631064</SimpleData>
							<SimpleData name="REFERENCE">Danovaro et al 2008</SimpleData>
							<SimpleData name="PROVIDER">Roberto Danovaro</SimpleData>
							<SimpleData name="BODY.OF.WATER">NE Atlantic</SimpleData>
							<SimpleData name="REGION">NE Atlantic</SimpleData>
							<SimpleData name="OCEAN.SEA">Atlantic</SimpleData>
							<SimpleData name="HABITAT">Continental Slope</SimpleData>
							<SimpleData name="COMMENTS"></SimpleData>
						</SchemaData>
					</ExtendedData>
					<Point>
						<coordinates>-10.36533333,40.07333333,0</coordinates>
					</Point>
				</Placemark>
				<Placemark>
					<styleUrl>#m_ylw-pushpin</styleUrl>
					<ExtendedData>
						<SchemaData schemaUrl="#data">
							<SimpleData name="CATEGORY">bacteria</SimpleData>
							<SimpleData name="STATION"></SimpleData>
							<SimpleData name="REPLICATION"></SimpleData>
							<SimpleData name="DEPTH.m">3416</SimpleData>
							<SimpleData name="DATE.UTC"></SimpleData>
							<SimpleData name="GEAR">Box Core</SimpleData>
							<SimpleData name="GEAR2">Core</SimpleData>
							<SimpleData name="SEDIMENT.DEPTH.cm">10</SimpleData>
							<SimpleData name="AREA.m2"></SimpleData>
							<SimpleData name="ABUNDANCE.per.m2">1905660000000</SimpleData>
							<SimpleData name="DATA.TYPE.ABUNDANCE">Raw</SimpleData>
							<SimpleData name="CARBON.WT.mg.C.per.m2">37.74475471</SimpleData>
							<SimpleData name="FINAL.UNIT.TYPE">organic C</SimpleData>
							<SimpleData name="CONVERSION.FACTOR.from.Rowe.1983">*1</SimpleData>
							<SimpleData name="FINAL.BIOMASS..mg.C.per.m2">37.74475471</SimpleData>
							<SimpleData name="REFERENCE">Danovaro et al 2008</SimpleData>
							<SimpleData name="PROVIDER">Roberto Danovaro</SimpleData>
							<SimpleData name="BODY.OF.WATER">NE Atlantic</SimpleData>
							<SimpleData name="REGION">NE Atlantic</SimpleData>
							<SimpleData name="OCEAN.SEA">Atlantic</SimpleData>
							<SimpleData name="HABITAT">Continental Slope</SimpleData>
							<SimpleData name="COMMENTS"></SimpleData>
						</SchemaData>
					</ExtendedData>
					<Point>
						<coordinates>-10.3675,40.59416667,0</coordinates>
					</Point>
				</Placemark>
				<Placemark>
					<styleUrl>#m_ylw-pushpin</styleUrl>
					<ExtendedData>
						<SchemaData schemaUrl="#data">
							<SimpleData name="CATEGORY">bacteria</SimpleData>
							<SimpleData name="STATION"></SimpleData>
							<SimpleData name="REPLICATION"></SimpleData>
							<SimpleData name="DEPTH.m">3416</SimpleData>
							<SimpleData name="DATE.UTC"></SimpleData>
							<SimpleData name="GEAR">Box Core</SimpleData>
							<SimpleData name="GEAR2">Core</SimpleData>
							<SimpleData name="SEDIMENT.DEPTH.cm">10</SimpleData>
							<SimpleData name="AREA.m2"></SimpleData>
							<SimpleData name="ABUNDANCE.per.m2">2301510000000</SimpleData>
							<SimpleData name="DATA.TYPE.ABUNDANCE">Raw</SimpleData>
							<SimpleData name="CARBON.WT.mg.C.per.m2">48.7392382</SimpleData>
							<SimpleData name="FINAL.UNIT.TYPE">organic C</SimpleData>
							<SimpleData name="CONVERSION.FACTOR.from.Rowe.1983">*1</SimpleData>
							<SimpleData name="FINAL.BIOMASS..mg.C.per.m2">48.7392382</SimpleData>
							<SimpleData name="REFERENCE">Danovaro et al 2008</SimpleData>
							<SimpleData name="PROVIDER">Roberto Danovaro</SimpleData>
							<SimpleData name="BODY.OF.WATER">NE Atlantic</SimpleData>
							<SimpleData name="REGION">NE Atlantic</SimpleData>
							<SimpleData name="OCEAN.SEA">Atlantic</SimpleData>
							<SimpleData name="HABITAT">Continental Slope</SimpleData>
							<SimpleData name="COMMENTS"></SimpleData>
						</SchemaData>
					</ExtendedData>
					<Point>
						<coordinates>-10.3675,40.59416667,0</coordinates>
					</Point>
				</Placemark>
				<Placemark>
					<styleUrl>#m_ylw-pushpin</styleUrl>
					<ExtendedData>
						<SchemaData schemaUrl="#data">
							<SimpleData name="CATEGORY">bacteria</SimpleData>
							<SimpleData name="STATION"></SimpleData>
							<SimpleData name="REPLICATION"></SimpleData>
							<SimpleData name="DEPTH.m">3416</SimpleData>
							<SimpleData name="DATE.UTC"></SimpleData>
							<SimpleData name="GEAR">Box Core</SimpleData>
							<SimpleData name="GEAR2">Core</SimpleData>
							<SimpleData name="SEDIMENT.DEPTH.cm">10</SimpleData>
							<SimpleData name="AREA.m2"></SimpleData>
							<SimpleData name="ABUNDANCE.per.m2">1509800000000</SimpleData>
							<SimpleData name="DATA.TYPE.ABUNDANCE">Raw</SimpleData>
							<SimpleData name="CARBON.WT.mg.C.per.m2">26.75027123</SimpleData>
							<SimpleData name="FINAL.UNIT.TYPE">organic C</SimpleData>
							<SimpleData name="CONVERSION.FACTOR.from.Rowe.1983">*1</SimpleData>
							<SimpleData name="FINAL.BIOMASS..mg.C.per.m2">26.75027123</SimpleData>
							<SimpleData name="REFERENCE">Danovaro et al 2008</SimpleData>
							<SimpleData name="PROVIDER">Roberto Danovaro</SimpleData>
							<SimpleData name="BODY.OF.WATER">NE Atlantic</SimpleData>
							<SimpleData name="REGION">NE Atlantic</SimpleData>
							<SimpleData name="OCEAN.SEA">Atlantic</SimpleData>
							<SimpleData name="HABITAT">Continental Slope</SimpleData>
							<SimpleData name="COMMENTS"></SimpleData>
						</SchemaData>
					</ExtendedData>
					<Point>
						<coordinates>-10.3675,40.59416667,0</coordinates>
					</Point>
				</Placemark>
				<Placemark>
					<styleUrl>#m_ylw-pushpin</styleUrl>
					<ExtendedData>
						<SchemaData schemaUrl="#data">
							<SimpleData name="CATEGORY">bacteria</SimpleData>
							<SimpleData name="STATION"></SimpleData>
							<SimpleData name="REPLICATION"></SimpleData>
							<SimpleData name="DEPTH.m">3062</SimpleData>
							<SimpleData name="DATE.UTC"></SimpleData>
							<SimpleData name="GEAR">Pistone Core</SimpleData>
							<SimpleData name="GEAR2">Core</SimpleData>
							<SimpleData name="SEDIMENT.DEPTH.cm">10</SimpleData>
							<SimpleData name="AREA.m2"></SimpleData>
							<SimpleData name="ABUNDANCE.per.m2">674024000000</SimpleData>
							<SimpleData name="DATA.TYPE.ABUNDANCE">Raw</SimpleData>
							<SimpleData name="CARBON.WT.mg.C.per.m2">13.48047101</SimpleData>
							<SimpleData name="FINAL.UNIT.TYPE">organic C</SimpleData>
							<SimpleData name="CONVERSION.FACTOR.from.Rowe.1983">*1</SimpleData>
							<SimpleData name="FINAL.BIOMASS..mg.C.per.m2">13.48047101</SimpleData>
							<SimpleData name="REFERENCE">Danovaro et al 2008</SimpleData>
							<SimpleData name="PROVIDER">Roberto Danovaro</SimpleData>
							<SimpleData name="BODY.OF.WATER">SE Pacific</SimpleData>
							<SimpleData name="REGION">SE Pacific</SimpleData>
							<SimpleData name="OCEAN.SEA">Pacific</SimpleData>
							<SimpleData name="HABITAT">Continental Slope</SimpleData>
							<SimpleData name="COMMENTS"></SimpleData>
						</SchemaData>
					</ExtendedData>
					<Point>
						<coordinates>-76.93000000000001,-33.30666667,0</coordinates>
					</Point>
				</Placemark>
				<Placemark>
					<styleUrl>#m_ylw-pushpin</styleUrl>
					<ExtendedData>
						<SchemaData schemaUrl="#data">
							<SimpleData name="CATEGORY">bacteria</SimpleData>
							<SimpleData name="STATION"></SimpleData>
							<SimpleData name="REPLICATION"></SimpleData>
							<SimpleData name="DEPTH.m">3062</SimpleData>
							<SimpleData name="DATE.UTC"></SimpleData>
							<SimpleData name="GEAR">Pistone Core</SimpleData>
							<SimpleData name="GEAR2">Core</SimpleData>
							<SimpleData name="SEDIMENT.DEPTH.cm">10</SimpleData>
							<SimpleData name="AREA.m2"></SimpleData>
							<SimpleData name="ABUNDANCE.per.m2">739912000000</SimpleData>
							<SimpleData name="DATA.TYPE.ABUNDANCE">Raw</SimpleData>
							<SimpleData name="CARBON.WT.mg.C.per.m2">15.48047101</SimpleData>
							<SimpleData name="FINAL.UNIT.TYPE">organic C</SimpleData>
							<SimpleData name="CONVERSION.FACTOR.from.Rowe.1983">*1</SimpleData>
							<SimpleData name="FINAL.BIOMASS..mg.C.per.m2">15.48047101</SimpleData>
							<SimpleData name="REFERENCE">Danovaro et al 2008</SimpleData>
							<SimpleData name="PROVIDER">Roberto Danovaro</SimpleData>
							<SimpleData name="BODY.OF.WATER">SE Pacific</SimpleData>
							<SimpleData name="REGION">SE Pacific</SimpleData>
							<SimpleData name="OCEAN.SEA">Pacific</SimpleData>
							<SimpleData name="HABITAT">Continental Slope</SimpleData>
							<SimpleData name="COMMENTS"></SimpleData>
						</SchemaData>
					</ExtendedData>
					<Point>
						<coordinates>-76.93000000000001,-33.30666667,0</coordinates>
					</Point>
				</Placemark>
				<Placemark>
					<styleUrl>#m_ylw-pushpin</styleUrl>
					<ExtendedData>
						<SchemaData schemaUrl="#data">
							<SimpleData name="CATEGORY">bacteria</SimpleData>
							<SimpleData name="STATION"></SimpleData>
							<SimpleData name="REPLICATION"></SimpleData>
							<SimpleData name="DEPTH.m">3062</SimpleData>
							<SimpleData name="DATE.UTC"></SimpleData>
							<SimpleData name="GEAR">Pistone Core</SimpleData>
							<SimpleData name="GEAR2">Core</SimpleData>
							<SimpleData name="SEDIMENT.DEPTH.cm">10</SimpleData>
							<SimpleData name="AREA.m2"></SimpleData>
							<SimpleData name="ABUNDANCE.per.m2">608135000000</SimpleData>
							<SimpleData name="DATA.TYPE.ABUNDANCE">Raw</SimpleData>
							<SimpleData name="CARBON.WT.mg.C.per.m2">11.48047101</SimpleData>
							<SimpleData name="FINAL.UNIT.TYPE">organic C</SimpleData>
							<SimpleData name="CONVERSION.FACTOR.from.Rowe.1983">*1</SimpleData>
							<SimpleData name="FINAL.BIOMASS..mg.C.per.m2">11.48047101</SimpleData>
							<SimpleData name="REFERENCE">Danovaro et al 2008</SimpleData>
							<SimpleData name="PROVIDER">Roberto Danovaro</SimpleData>
							<SimpleData name="BODY.OF.WATER">SE Pacific</SimpleData>
							<SimpleData name="REGION">SE Pacific</SimpleData>
							<SimpleData name="OCEAN.SEA">Pacific</SimpleData>
							<SimpleData name="HABITAT">Continental Slope</SimpleData>
							<SimpleData name="COMMENTS"></SimpleData>
						</SchemaData>
					</ExtendedData>
					<Point>
						<coordinates>-76.93000000000001,-33.30666667,0</coordinates>
					</Point>
				</Placemark>
				<Placemark>
					<styleUrl>#m_ylw-pushpin</styleUrl>
					<ExtendedData>
						<SchemaData schemaUrl="#data">
							<SimpleData name="CATEGORY">bacteria</SimpleData>
							<SimpleData name="STATION"></SimpleData>
							<SimpleData name="REPLICATION"></SimpleData>
							<SimpleData name="DEPTH.m">2920</SimpleData>
							<SimpleData name="DATE.UTC"></SimpleData>
							<SimpleData name="GEAR">Pistone Core</SimpleData>
							<SimpleData name="GEAR2">Core</SimpleData>
							<SimpleData name="SEDIMENT.DEPTH.cm">10</SimpleData>
							<SimpleData name="AREA.m2"></SimpleData>
							<SimpleData name="ABUNDANCE.per.m2">907470000000</SimpleData>
							<SimpleData name="DATA.TYPE.ABUNDANCE">Raw</SimpleData>
							<SimpleData name="CARBON.WT.mg.C.per.m2">18.14940291</SimpleData>
							<SimpleData name="FINAL.UNIT.TYPE">organic C</SimpleData>
							<SimpleData name="CONVERSION.FACTOR.from.Rowe.1983">*1</SimpleData>
							<SimpleData name="FINAL.BIOMASS..mg.C.per.m2">18.14940291</SimpleData>
							<SimpleData name="REFERENCE">Danovaro et al 2008</SimpleData>
							<SimpleData name="PROVIDER">Roberto Danovaro</SimpleData>
							<SimpleData name="BODY.OF.WATER">SE Pacific</SimpleData>
							<SimpleData name="REGION">SE Pacific</SimpleData>
							<SimpleData name="OCEAN.SEA">Pacific</SimpleData>
							<SimpleData name="HABITAT">Continental Slope</SimpleData>
							<SimpleData name="COMMENTS"></SimpleData>
						</SchemaData>
					</ExtendedData>
					<Point>
						<coordinates>-76.905,-33.55166667,0</coordinates>
					</Point>
				</Placemark>
				<Placemark>
					<styleUrl>#m_ylw-pushpin</styleUrl>
					<ExtendedData>
						<SchemaData schemaUrl="#data">
							<SimpleData name="CATEGORY">bacteria</SimpleData>
							<SimpleData name="STATION"></SimpleData>
							<SimpleData name="REPLICATION"></SimpleData>
							<SimpleData name="DEPTH.m">2920</SimpleData>
							<SimpleData name="DATE.UTC"></SimpleData>
							<SimpleData name="GEAR">Pistone Core</SimpleData>
							<SimpleData name="GEAR2">Core</SimpleData>
							<SimpleData name="SEDIMENT.DEPTH.cm">10</SimpleData>
							<SimpleData name="AREA.m2"></SimpleData>
							<SimpleData name="ABUNDANCE.per.m2">966702000000</SimpleData>
							<SimpleData name="DATA.TYPE.ABUNDANCE">Raw</SimpleData>
							<SimpleData name="CARBON.WT.mg.C.per.m2">19.46940291</SimpleData>
							<SimpleData name="FINAL.UNIT.TYPE">organic C</SimpleData>
							<SimpleData name="CONVERSION.FACTOR.from.Rowe.1983">*1</SimpleData>
							<SimpleData name="FINAL.BIOMASS..mg.C.per.m2">19.46940291</SimpleData>
							<SimpleData name="REFERENCE">Danovaro et al 2008</SimpleData>
							<SimpleData name="PROVIDER">Roberto Danovaro</SimpleData>
							<SimpleData name="BODY.OF.WATER">SE Pacific</SimpleData>
							<SimpleData name="REGION">SE Pacific</SimpleData>
							<SimpleData name="OCEAN.SEA">Pacific</SimpleData>
							<SimpleData name="HABITAT">Continental Slope</SimpleData>
							<SimpleData name="COMMENTS"></SimpleData>
						</SchemaData>
					</ExtendedData>
					<Point>
						<coordinates>-76.905,-33.55166667,0</coordinates>
					</Point>
				</Placemark>
				<Placemark>
					<styleUrl>#m_ylw-pushpin</styleUrl>
					<ExtendedData>
						<SchemaData schemaUrl="#data">
							<SimpleData name="CATEGORY">bacteria</SimpleData>
							<SimpleData name="STATION"></SimpleData>
							<SimpleData name="REPLICATION"></SimpleData>
							<SimpleData name="DEPTH.m">2920</SimpleData>
							<SimpleData name="DATE.UTC"></SimpleData>
							<SimpleData name="GEAR">Pistone Core</SimpleData>
							<SimpleData name="GEAR2">Core</SimpleData>
							<SimpleData name="SEDIMENT.DEPTH.cm">10</SimpleData>
							<SimpleData name="AREA.m2"></SimpleData>
							<SimpleData name="ABUNDANCE.per.m2">848238000000</SimpleData>
							<SimpleData name="DATA.TYPE.ABUNDANCE">Raw</SimpleData>
							<SimpleData name="CARBON.WT.mg.C.per.m2">16.82940291</SimpleData>
							<SimpleData name="FINAL.UNIT.TYPE">organic C</SimpleData>
							<SimpleData name="CONVERSION.FACTOR.from.Rowe.1983">*1</SimpleData>
							<SimpleData name="FINAL.BIOMASS..mg.C.per.m2">16.82940291</SimpleData>
							<SimpleData name="REFERENCE">Danovaro et al 2008</SimpleData>
							<SimpleData name="PROVIDER">Roberto Danovaro</SimpleData>
							<SimpleData name="BODY.OF.WATER">SE Pacific</SimpleData>
							<SimpleData name="REGION">SE Pacific</SimpleData>
							<SimpleData name="OCEAN.SEA">Pacific</SimpleData>
							<SimpleData name="HABITAT">Continental Slope</SimpleData>
							<SimpleData name="COMMENTS"></SimpleData>
						</SchemaData>
					</ExtendedData>
					<Point>
						<coordinates>-76.905,-33.55166667,0</coordinates>
					</Point>
				</Placemark>
				<Placemark>
					<styleUrl>#m_ylw-pushpin</styleUrl>
					<ExtendedData>
						<SchemaData schemaUrl="#data">
							<SimpleData name="CATEGORY">bacteria</SimpleData>
							<SimpleData name="STATION"></SimpleData>
							<SimpleData name="REPLICATION"></SimpleData>
							<SimpleData name="DEPTH.m">2227</SimpleData>
							<SimpleData name="DATE.UTC"></SimpleData>
							<SimpleData name="GEAR">Pistone Core</SimpleData>
							<SimpleData name="GEAR2">Core</SimpleData>
							<SimpleData name="SEDIMENT.DEPTH.cm">10</SimpleData>
							<SimpleData name="AREA.m2"></SimpleData>
							<SimpleData name="ABUNDANCE.per.m2">5941840000000</SimpleData>
							<SimpleData name="DATA.TYPE.ABUNDANCE">Raw</SimpleData>
							<SimpleData name="CARBON.WT.mg.C.per.m2">118.8367058</SimpleData>
							<SimpleData name="FINAL.UNIT.TYPE">organic C</SimpleData>
							<SimpleData name="CONVERSION.FACTOR.from.Rowe.1983">*1</SimpleData>
							<SimpleData name="FINAL.BIOMASS..mg.C.per.m2">118.8367058</SimpleData>
							<SimpleData name="REFERENCE">Danovaro et al 2008</SimpleData>
							<SimpleData name="PROVIDER">Roberto Danovaro</SimpleData>
							<SimpleData name="BODY.OF.WATER">SE Pacific</SimpleData>
							<SimpleData name="REGION">SE Pacific</SimpleData>
							<SimpleData name="OCEAN.SEA">Pacific</SimpleData>
							<SimpleData name="HABITAT">Continental Slope</SimpleData>
							<SimpleData name="COMMENTS"></SimpleData>
						</SchemaData>
					</ExtendedData>
					<Point>
						<coordinates>-77.75,-33.48333333,0</coordinates>
					</Point>
				</Placemark>
				<Placemark>
					<styleUrl>#m_ylw-pushpin</styleUrl>
					<ExtendedData>
						<SchemaData schemaUrl="#data">
							<SimpleData name="CATEGORY">bacteria</SimpleData>
							<SimpleData name="STATION"></SimpleData>
							<SimpleData name="REPLICATION"></SimpleData>
							<SimpleData name="DEPTH.m">2227</SimpleData>
							<SimpleData name="DATE.UTC"></SimpleData>
							<SimpleData name="GEAR">Pistone Core</SimpleData>
							<SimpleData name="GEAR2">Core</SimpleData>
							<SimpleData name="SEDIMENT.DEPTH.cm">10</SimpleData>
							<SimpleData name="AREA.m2"></SimpleData>
							<SimpleData name="ABUNDANCE.per.m2">6336710000000</SimpleData>
							<SimpleData name="DATA.TYPE.ABUNDANCE">Raw</SimpleData>
							<SimpleData name="CARBON.WT.mg.C.per.m2">138.8367058</SimpleData>
							<SimpleData name="FINAL.UNIT.TYPE">organic C</SimpleData>
							<SimpleData name="CONVERSION.FACTOR.from.Rowe.1983">*1</SimpleData>
							<SimpleData name="FINAL.BIOMASS..mg.C.per.m2">138.8367058</SimpleData>
							<SimpleData name="REFERENCE">Danovaro et al 2008</SimpleData>
							<SimpleData name="PROVIDER">Roberto Danovaro</SimpleData>
							<SimpleData name="BODY.OF.WATER">SE Pacific</SimpleData>
							<SimpleData name="REGION">SE Pacific</SimpleData>
							<SimpleData name="OCEAN.SEA">Pacific</SimpleData>
							<SimpleData name="HABITAT">Continental Slope</SimpleData>
							<SimpleData name="COMMENTS"></SimpleData>
						</SchemaData>
					</ExtendedData>
					<Point>
						<coordinates>-77.75,-33.48333333,0</coordinates>
					</Point>
				</Placemark>
				<Placemark>
					<styleUrl>#m_ylw-pushpin</styleUrl>
					<ExtendedData>
						<SchemaData schemaUrl="#data">
							<SimpleData name="CATEGORY">bacteria</SimpleData>
							<SimpleData name="STATION"></SimpleData>
							<SimpleData name="REPLICATION"></SimpleData>
							<SimpleData name="DEPTH.m">2227</SimpleData>
							<SimpleData name="DATE.UTC"></SimpleData>
							<SimpleData name="GEAR">Pistone Core</SimpleData>
							<SimpleData name="GEAR2">Core</SimpleData>
							<SimpleData name="SEDIMENT.DEPTH.cm">10</SimpleData>
							<SimpleData name="AREA.m2"></SimpleData>
							<SimpleData name="ABUNDANCE.per.m2">5546960000000</SimpleData>
							<SimpleData name="DATA.TYPE.ABUNDANCE">Raw</SimpleData>
							<SimpleData name="CARBON.WT.mg.C.per.m2">98.8367058</SimpleData>
							<SimpleData name="FINAL.UNIT.TYPE">organic C</SimpleData>
							<SimpleData name="CONVERSION.FACTOR.from.Rowe.1983">*1</SimpleData>
							<SimpleData name="FINAL.BIOMASS..mg.C.per.m2">98.8367058</SimpleData>
							<SimpleData name="REFERENCE">Danovaro et al 2008</SimpleData>
							<SimpleData name="PROVIDER">Roberto Danovaro</SimpleData>
							<SimpleData name="BODY.OF.WATER">SE Pacific</SimpleData>
							<SimpleData name="REGION">SE Pacific</SimpleData>
							<SimpleData name="OCEAN.SEA">Pacific</SimpleData>
							<SimpleData name="HABITAT">Continental Slope</SimpleData>
							<SimpleData name="COMMENTS"></SimpleData>
						</SchemaData>
					</ExtendedData>
					<Point>
						<coordinates>-77.75,-33.48333333,0</coordinates>
					</Point>
				</Placemark>
				<Placemark>
					<styleUrl>#m_ylw-pushpin</styleUrl>
					<ExtendedData>
						<SchemaData schemaUrl="#data">
							<SimpleData name="CATEGORY">bacteria</SimpleData>
							<SimpleData name="STATION"></SimpleData>
							<SimpleData name="REPLICATION"></SimpleData>
							<SimpleData name="DEPTH.m">2300</SimpleData>
							<SimpleData name="DATE.UTC"></SimpleData>
							<SimpleData name="GEAR">Pistone Core</SimpleData>
							<SimpleData name="GEAR2">Core</SimpleData>
							<SimpleData name="SEDIMENT.DEPTH.cm">10</SimpleData>
							<SimpleData name="AREA.m2"></SimpleData>
							<SimpleData name="ABUNDANCE.per.m2">1474290000000</SimpleData>
							<SimpleData name="DATA.TYPE.ABUNDANCE">Raw</SimpleData>
							<SimpleData name="CARBON.WT.mg.C.per.m2">29.48579918</SimpleData>
							<SimpleData name="FINAL.UNIT.TYPE">organic C</SimpleData>
							<SimpleData name="CONVERSION.FACTOR.from.Rowe.1983">*1</SimpleData>
							<SimpleData name="FINAL.BIOMASS..mg.C.per.m2">29.48579918</SimpleData>
							<SimpleData name="REFERENCE">Danovaro et al 2008</SimpleData>
							<SimpleData name="PROVIDER">Roberto Danovaro</SimpleData>
							<SimpleData name="BODY.OF.WATER">SE Pacific</SimpleData>
							<SimpleData name="REGION">SE Pacific</SimpleData>
							<SimpleData name="OCEAN.SEA">Pacific</SimpleData>
							<SimpleData name="HABITAT">Continental Slope</SimpleData>
							<SimpleData name="COMMENTS"></SimpleData>
						</SchemaData>
					</ExtendedData>
					<Point>
						<coordinates>-77.85666667,-33.655,0</coordinates>
					</Point>
				</Placemark>
				<Placemark>
					<styleUrl>#m_ylw-pushpin</styleUrl>
					<ExtendedData>
						<SchemaData schemaUrl="#data">
							<SimpleData name="CATEGORY">bacteria</SimpleData>
							<SimpleData name="STATION"></SimpleData>
							<SimpleData name="REPLICATION"></SimpleData>
							<SimpleData name="DEPTH.m">2300</SimpleData>
							<SimpleData name="DATE.UTC"></SimpleData>
							<SimpleData name="GEAR">Pistone Core</SimpleData>
							<SimpleData name="GEAR2">Core</SimpleData>
							<SimpleData name="SEDIMENT.DEPTH.cm">10</SimpleData>
							<SimpleData name="AREA.m2"></SimpleData>
							<SimpleData name="ABUNDANCE.per.m2">1497980000000</SimpleData>
							<SimpleData name="DATA.TYPE.ABUNDANCE">Raw</SimpleData>
							<SimpleData name="CARBON.WT.mg.C.per.m2">31.32579918</SimpleData>
							<SimpleData name="FINAL.UNIT.TYPE">organic C</SimpleData>
							<SimpleData name="CONVERSION.FACTOR.from.Rowe.1983">*1</SimpleData>
							<SimpleData name="FINAL.BIOMASS..mg.C.per.m2">31.32579918</SimpleData>
							<SimpleData name="REFERENCE">Danovaro et al 2008</SimpleData>
							<SimpleData name="PROVIDER">Roberto Danovaro</SimpleData>
							<SimpleData name="BODY.OF.WATER">SE Pacific</SimpleData>
							<SimpleData name="REGION">SE Pacific</SimpleData>
							<SimpleData name="OCEAN.SEA">Pacific</SimpleData>
							<SimpleData name="HABITAT">Continental Slope</SimpleData>
							<SimpleData name="COMMENTS"></SimpleData>
						</SchemaData>
					</ExtendedData>
					<Point>
						<coordinates>-77.85666667,-33.655,0</coordinates>
					</Point>
				</Placemark>
				<Placemark>
					<styleUrl>#m_ylw-pushpin</styleUrl>
					<ExtendedData>
						<SchemaData schemaUrl="#data">
							<SimpleData name="CATEGORY">bacteria</SimpleData>
							<SimpleData name="STATION"></SimpleData>
							<SimpleData name="REPLICATION"></SimpleData>
							<SimpleData name="DEPTH.m">2300</SimpleData>
							<SimpleData name="DATE.UTC"></SimpleData>
							<SimpleData name="GEAR">Pistone Core</SimpleData>
							<SimpleData name="GEAR2">Core</SimpleData>
							<SimpleData name="SEDIMENT.DEPTH.cm">10</SimpleData>
							<SimpleData name="AREA.m2"></SimpleData>
							<SimpleData name="ABUNDANCE.per.m2">1450600000000</SimpleData>
							<SimpleData name="DATA.TYPE.ABUNDANCE">Raw</SimpleData>
							<SimpleData name="CARBON.WT.mg.C.per.m2">27.64579918</SimpleData>
							<SimpleData name="FINAL.UNIT.TYPE">organic C</SimpleData>
							<SimpleData name="CONVERSION.FACTOR.from.Rowe.1983">*1</SimpleData>
							<SimpleData name="FINAL.BIOMASS..mg.C.per.m2">27.64579918</SimpleData>
							<SimpleData name="REFERENCE">Danovaro et al 2008</SimpleData>
							<SimpleData name="PROVIDER">Roberto Danovaro</SimpleData>
							<SimpleData name="BODY.OF.WATER">SE Pacific</SimpleData>
							<SimpleData name="REGION">SE Pacific</SimpleData>
							<SimpleData name="OCEAN.SEA">Pacific</SimpleData>
							<SimpleData name="HABITAT">Continental Slope</SimpleData>
							<SimpleData name="COMMENTS"></SimpleData>
						</SchemaData>
					</ExtendedData>
					<Point>
						<coordinates>-77.85666667,-33.655,0</coordinates>
					</Point>
				</Placemark>
				<Placemark>
					<styleUrl>#m_ylw-pushpin</styleUrl>
					<ExtendedData>
						<SchemaData schemaUrl="#data">
							<SimpleData name="CATEGORY">bacteria</SimpleData>
							<SimpleData name="STATION"></SimpleData>
							<SimpleData name="REPLICATION"></SimpleData>
							<SimpleData name="DEPTH.m">2080</SimpleData>
							<SimpleData name="DATE.UTC"></SimpleData>
							<SimpleData name="GEAR">Pistone Core</SimpleData>
							<SimpleData name="GEAR2">Core</SimpleData>
							<SimpleData name="SEDIMENT.DEPTH.cm">10</SimpleData>
							<SimpleData name="AREA.m2"></SimpleData>
							<SimpleData name="ABUNDANCE.per.m2">1770780000000</SimpleData>
							<SimpleData name="DATA.TYPE.ABUNDANCE">Raw</SimpleData>
							<SimpleData name="CARBON.WT.mg.C.per.m2">35.41554941</SimpleData>
							<SimpleData name="FINAL.UNIT.TYPE">organic C</SimpleData>
							<SimpleData name="CONVERSION.FACTOR.from.Rowe.1983">*1</SimpleData>
							<SimpleData name="FINAL.BIOMASS..mg.C.per.m2">35.41554941</SimpleData>
							<SimpleData name="REFERENCE">Danovaro et al 2008</SimpleData>
							<SimpleData name="PROVIDER">Roberto Danovaro</SimpleData>
							<SimpleData name="BODY.OF.WATER">SE Pacific</SimpleData>
							<SimpleData name="REGION">SE Pacific</SimpleData>
							<SimpleData name="OCEAN.SEA">Pacific</SimpleData>
							<SimpleData name="HABITAT">Continental Slope</SimpleData>
							<SimpleData name="COMMENTS"></SimpleData>
						</SchemaData>
					</ExtendedData>
					<Point>
						<coordinates>-78.86666667,-33.475,0</coordinates>
					</Point>
				</Placemark>
				<Placemark>
					<styleUrl>#m_ylw-pushpin</styleUrl>
					<ExtendedData>
						<SchemaData schemaUrl="#data">
							<SimpleData name="CATEGORY">bacteria</SimpleData>
							<SimpleData name="STATION"></SimpleData>
							<SimpleData name="REPLICATION"></SimpleData>
							<SimpleData name="DEPTH.m">2080</SimpleData>
							<SimpleData name="DATE.UTC"></SimpleData>
							<SimpleData name="GEAR">Pistone Core</SimpleData>
							<SimpleData name="GEAR2">Core</SimpleData>
							<SimpleData name="SEDIMENT.DEPTH.cm">10</SimpleData>
							<SimpleData name="AREA.m2"></SimpleData>
							<SimpleData name="ABUNDANCE.per.m2">2038570000000</SimpleData>
							<SimpleData name="DATA.TYPE.ABUNDANCE">Raw</SimpleData>
							<SimpleData name="CARBON.WT.mg.C.per.m2">39.57554941</SimpleData>
							<SimpleData name="FINAL.UNIT.TYPE">organic C</SimpleData>
							<SimpleData name="CONVERSION.FACTOR.from.Rowe.1983">*1</SimpleData>
							<SimpleData name="FINAL.BIOMASS..mg.C.per.m2">39.57554941</SimpleData>
							<SimpleData name="REFERENCE">Danovaro et al 2008</SimpleData>
							<SimpleData name="PROVIDER">Roberto Danovaro</SimpleData>
							<SimpleData name="BODY.OF.WATER">SE Pacific</SimpleData>
							<SimpleData name="REGION">SE Pacific</SimpleData>
							<SimpleData name="OCEAN.SEA">Pacific</SimpleData>
							<SimpleData name="HABITAT">Continental Slope</SimpleData>
							<SimpleData name="COMMENTS"></SimpleData>
						</SchemaData>
					</ExtendedData>
					<Point>
						<coordinates>-78.86666667,-33.475,0</coordinates>
					</Point>
				</Placemark>
				<Placemark>
					<styleUrl>#m_ylw-pushpin</styleUrl>
					<ExtendedData>
						<SchemaData schemaUrl="#data">
							<SimpleData name="CATEGORY">bacteria</SimpleData>
							<SimpleData name="STATION"></SimpleData>
							<SimpleData name="REPLICATION"></SimpleData>
							<SimpleData name="DEPTH.m">2080</SimpleData>
							<SimpleData name="DATE.UTC"></SimpleData>
							<SimpleData name="GEAR">Pistone Core</SimpleData>
							<SimpleData name="GEAR2">Core</SimpleData>
							<SimpleData name="SEDIMENT.DEPTH.cm">10</SimpleData>
							<SimpleData name="AREA.m2"></SimpleData>
							<SimpleData name="ABUNDANCE.per.m2">1502980000000</SimpleData>
							<SimpleData name="DATA.TYPE.ABUNDANCE">Raw</SimpleData>
							<SimpleData name="CARBON.WT.mg.C.per.m2">31.25554941</SimpleData>
							<SimpleData name="FINAL.UNIT.TYPE">organic C</SimpleData>
							<SimpleData name="CONVERSION.FACTOR.from.Rowe.1983">*1</SimpleData>
							<SimpleData name="FINAL.BIOMASS..mg.C.per.m2">31.25554941</SimpleData>
							<SimpleData name="REFERENCE">Danovaro et al 2008</SimpleData>
							<SimpleData name="PROVIDER">Roberto Danovaro</SimpleData>
							<SimpleData name="BODY.OF.WATER">SE Pacific</SimpleData>
							<SimpleData name="REGION">SE Pacific</SimpleData>
							<SimpleData name="OCEAN.SEA">Pacific</SimpleData>
							<SimpleData name="HABITAT">Continental Slope</SimpleData>
							<SimpleData name="COMMENTS"></SimpleData>
						</SchemaData>
					</ExtendedData>
					<Point>
						<coordinates>-78.86666667,-33.475,0</coordinates>
					</Point>
				</Placemark>
				<Placemark>
					<styleUrl>#m_ylw-pushpin</styleUrl>
					<ExtendedData>
						<SchemaData schemaUrl="#data">
							<SimpleData name="CATEGORY">bacteria</SimpleData>
							<SimpleData name="STATION"></SimpleData>
							<SimpleData name="REPLICATION"></SimpleData>
							<SimpleData name="DEPTH.m">2540</SimpleData>
							<SimpleData name="DATE.UTC"></SimpleData>
							<SimpleData name="GEAR">Pistone Core</SimpleData>
							<SimpleData name="GEAR2">Core</SimpleData>
							<SimpleData name="SEDIMENT.DEPTH.cm">10</SimpleData>
							<SimpleData name="AREA.m2"></SimpleData>
							<SimpleData name="ABUNDANCE.per.m2">1887540000000</SimpleData>
							<SimpleData name="DATA.TYPE.ABUNDANCE">Raw</SimpleData>
							<SimpleData name="CARBON.WT.mg.C.per.m2">37.75075805</SimpleData>
							<SimpleData name="FINAL.UNIT.TYPE">organic C</SimpleData>
							<SimpleData name="CONVERSION.FACTOR.from.Rowe.1983">*1</SimpleData>
							<SimpleData name="FINAL.BIOMASS..mg.C.per.m2">37.75075805</SimpleData>
							<SimpleData name="REFERENCE">Danovaro et al 2008</SimpleData>
							<SimpleData name="PROVIDER">Roberto Danovaro</SimpleData>
							<SimpleData name="BODY.OF.WATER">SE Pacific</SimpleData>
							<SimpleData name="REGION">SE Pacific</SimpleData>
							<SimpleData name="OCEAN.SEA">Pacific</SimpleData>
							<SimpleData name="HABITAT">Continental Slope</SimpleData>
							<SimpleData name="COMMENTS"></SimpleData>
						</SchemaData>
					</ExtendedData>
					<Point>
						<coordinates>-78.535,-33.80333333,0</coordinates>
					</Point>
				</Placemark>
				<Placemark>
					<styleUrl>#m_ylw-pushpin</styleUrl>
					<ExtendedData>
						<SchemaData schemaUrl="#data">
							<SimpleData name="CATEGORY">bacteria</SimpleData>
							<SimpleData name="STATION"></SimpleData>
							<SimpleData name="REPLICATION"></SimpleData>
							<SimpleData name="DEPTH.m">2540</SimpleData>
							<SimpleData name="DATE.UTC"></SimpleData>
							<SimpleData name="GEAR">Pistone Core</SimpleData>
							<SimpleData name="GEAR2">Core</SimpleData>
							<SimpleData name="SEDIMENT.DEPTH.cm">10</SimpleData>
							<SimpleData name="AREA.m2"></SimpleData>
							<SimpleData name="ABUNDANCE.per.m2">1942820000000</SimpleData>
							<SimpleData name="DATA.TYPE.ABUNDANCE">Raw</SimpleData>
							<SimpleData name="CARBON.WT.mg.C.per.m2">44.15075805</SimpleData>
							<SimpleData name="FINAL.UNIT.TYPE">organic C</SimpleData>
							<SimpleData name="CONVERSION.FACTOR.from.Rowe.1983">*1</SimpleData>
							<SimpleData name="FINAL.BIOMASS..mg.C.per.m2">44.15075805</SimpleData>
							<SimpleData name="REFERENCE">Danovaro et al 2008</SimpleData>
							<SimpleData name="PROVIDER">Roberto Danovaro</SimpleData>
							<SimpleData name="BODY.OF.WATER">SE Pacific</SimpleData>
							<SimpleData name="REGION">SE Pacific</SimpleData>
							<SimpleData name="OCEAN.SEA">Pacific</SimpleData>
							<SimpleData name="HABITAT">Continental Slope</SimpleData>
							<SimpleData name="COMMENTS"></SimpleData>
						</SchemaData>
					</ExtendedData>
					<Point>
						<coordinates>-78.535,-33.80333333,0</coordinates>
					</Point>
				</Placemark>
				<Placemark>
					<styleUrl>#m_ylw-pushpin</styleUrl>
					<ExtendedData>
						<SchemaData schemaUrl="#data">
							<SimpleData name="CATEGORY">bacteria</SimpleData>
							<SimpleData name="STATION"></SimpleData>
							<SimpleData name="REPLICATION"></SimpleData>
							<SimpleData name="DEPTH.m">2540</SimpleData>
							<SimpleData name="DATE.UTC"></SimpleData>
							<SimpleData name="GEAR">Pistone Core</SimpleData>
							<SimpleData name="GEAR2">Core</SimpleData>
							<SimpleData name="SEDIMENT.DEPTH.cm">10</SimpleData>
							<SimpleData name="AREA.m2"></SimpleData>
							<SimpleData name="ABUNDANCE.per.m2">1832250000000</SimpleData>
							<SimpleData name="DATA.TYPE.ABUNDANCE">Raw</SimpleData>
							<SimpleData name="CARBON.WT.mg.C.per.m2">31.35075805</SimpleData>
							<SimpleData name="FINAL.UNIT.TYPE">organic C</SimpleData>
							<SimpleData name="CONVERSION.FACTOR.from.Rowe.1983">*1</SimpleData>
							<SimpleData name="FINAL.BIOMASS..mg.C.per.m2">31.35075805</SimpleData>
							<SimpleData name="REFERENCE">Danovaro et al 2008</SimpleData>
							<SimpleData name="PROVIDER">Roberto Danovaro</SimpleData>
							<SimpleData name="BODY.OF.WATER">SE Pacific</SimpleData>
							<SimpleData name="REGION">SE Pacific</SimpleData>
							<SimpleData name="OCEAN.SEA">Pacific</SimpleData>
							<SimpleData name="HABITAT">Continental Slope</SimpleData>
							<SimpleData name="COMMENTS"></SimpleData>
						</SchemaData>
					</ExtendedData>
					<Point>
						<coordinates>-78.535,-33.80333333,0</coordinates>
					</Point>
				</Placemark>
				<Placemark>
					<styleUrl>#m_ylw-pushpin</styleUrl>
					<ExtendedData>
						<SchemaData schemaUrl="#data">
							<SimpleData name="CATEGORY">bacteria</SimpleData>
							<SimpleData name="STATION"></SimpleData>
							<SimpleData name="REPLICATION"></SimpleData>
							<SimpleData name="DEPTH.m">3070</SimpleData>
							<SimpleData name="DATE.UTC"></SimpleData>
							<SimpleData name="GEAR">Pistone Core</SimpleData>
							<SimpleData name="GEAR2">Core</SimpleData>
							<SimpleData name="SEDIMENT.DEPTH.cm">10</SimpleData>
							<SimpleData name="AREA.m2"></SimpleData>
							<SimpleData name="ABUNDANCE.per.m2">1661370000000</SimpleData>
							<SimpleData name="DATA.TYPE.ABUNDANCE">Raw</SimpleData>
							<SimpleData name="CARBON.WT.mg.C.per.m2">33.2273684</SimpleData>
							<SimpleData name="FINAL.UNIT.TYPE">organic C</SimpleData>
							<SimpleData name="CONVERSION.FACTOR.from.Rowe.1983">*1</SimpleData>
							<SimpleData name="FINAL.BIOMASS..mg.C.per.m2">33.2273684</SimpleData>
							<SimpleData name="REFERENCE">Danovaro et al 2008</SimpleData>
							<SimpleData name="PROVIDER">Roberto Danovaro</SimpleData>
							<SimpleData name="BODY.OF.WATER">SE Pacific</SimpleData>
							<SimpleData name="REGION">SE Pacific</SimpleData>
							<SimpleData name="OCEAN.SEA">Pacific</SimpleData>
							<SimpleData name="HABITAT">Continental Slope</SimpleData>
							<SimpleData name="COMMENTS"></SimpleData>
						</SchemaData>
					</ExtendedData>
					<Point>
						<coordinates>-80.33333333,-33.70666667,0</coordinates>
					</Point>
				</Placemark>
				<Placemark>
					<styleUrl>#m_ylw-pushpin</styleUrl>
					<ExtendedData>
						<SchemaData schemaUrl="#data">
							<SimpleData name="CATEGORY">bacteria</SimpleData>
							<SimpleData name="STATION"></SimpleData>
							<SimpleData name="REPLICATION"></SimpleData>
							<SimpleData name="DEPTH.m">3070</SimpleData>
							<SimpleData name="DATE.UTC"></SimpleData>
							<SimpleData name="GEAR">Pistone Core</SimpleData>
							<SimpleData name="GEAR2">Core</SimpleData>
							<SimpleData name="SEDIMENT.DEPTH.cm">10</SimpleData>
							<SimpleData name="AREA.m2"></SimpleData>
							<SimpleData name="ABUNDANCE.per.m2">1760090000000</SimpleData>
							<SimpleData name="DATA.TYPE.ABUNDANCE">Raw</SimpleData>
							<SimpleData name="CARBON.WT.mg.C.per.m2">37.6273684</SimpleData>
							<SimpleData name="FINAL.UNIT.TYPE">organic C</SimpleData>
							<SimpleData name="CONVERSION.FACTOR.from.Rowe.1983">*1</SimpleData>
							<SimpleData name="FINAL.BIOMASS..mg.C.per.m2">37.6273684</SimpleData>
							<SimpleData name="REFERENCE">Danovaro et al 2008</SimpleData>
							<SimpleData name="PROVIDER">Roberto Danovaro</SimpleData>
							<SimpleData name="BODY.OF.WATER">SE Pacific</SimpleData>
							<SimpleData name="REGION">SE Pacific</SimpleData>
							<SimpleData name="OCEAN.SEA">Pacific</SimpleData>
							<SimpleData name="HABITAT">Continental Slope</SimpleData>
							<SimpleData name="COMMENTS"></SimpleData>
						</SchemaData>
					</ExtendedData>
					<Point>
						<coordinates>-80.33333333,-33.70666667,0</coordinates>
					</Point>
				</Placemark>
				<Placemark>
					<styleUrl>#m_ylw-pushpin</styleUrl>
					<ExtendedData>
						<SchemaData schemaUrl="#data">
							<SimpleData name="CATEGORY">bacteria</SimpleData>
							<SimpleData name="STATION"></SimpleData>
							<SimpleData name="REPLICATION"></SimpleData>
							<SimpleData name="DEPTH.m">3070</SimpleData>
							<SimpleData name="DATE.UTC"></SimpleData>
							<SimpleData name="GEAR">Pistone Core</SimpleData>
							<SimpleData name="GEAR2">Core</SimpleData>
							<SimpleData name="SEDIMENT.DEPTH.cm">10</SimpleData>
							<SimpleData name="AREA.m2"></SimpleData>
							<SimpleData name="ABUNDANCE.per.m2">1562650000000</SimpleData>
							<SimpleData name="DATA.TYPE.ABUNDANCE">Raw</SimpleData>
							<SimpleData name="CARBON.WT.mg.C.per.m2">28.8273684</SimpleData>
							<SimpleData name="FINAL.UNIT.TYPE">organic C</SimpleData>
							<SimpleData name="CONVERSION.FACTOR.from.Rowe.1983">*1</SimpleData>
							<SimpleData name="FINAL.BIOMASS..mg.C.per.m2">28.8273684</SimpleData>
							<SimpleData name="REFERENCE">Danovaro et al 2008</SimpleData>
							<SimpleData name="PROVIDER">Roberto Danovaro</SimpleData>
							<SimpleData name="BODY.OF.WATER">SE Pacific</SimpleData>
							<SimpleData name="REGION">SE Pacific</SimpleData>
							<SimpleData name="OCEAN.SEA">Pacific</SimpleData>
							<SimpleData name="HABITAT">Continental Slope</SimpleData>
							<SimpleData name="COMMENTS"></SimpleData>
						</SchemaData>
					</ExtendedData>
					<Point>
						<coordinates>-80.33333333,-33.70666667,0</coordinates>
					</Point>
				</Placemark>
				<Placemark>
					<styleUrl>#m_ylw-pushpin</styleUrl>
					<ExtendedData>
						<SchemaData schemaUrl="#data">
							<SimpleData name="CATEGORY">bacteria</SimpleData>
							<SimpleData name="STATION"></SimpleData>
							<SimpleData name="REPLICATION"></SimpleData>
							<SimpleData name="DEPTH.m">3050</SimpleData>
							<SimpleData name="DATE.UTC"></SimpleData>
							<SimpleData name="GEAR">Pistone Core</SimpleData>
							<SimpleData name="GEAR2">Core</SimpleData>
							<SimpleData name="SEDIMENT.DEPTH.cm">10</SimpleData>
							<SimpleData name="AREA.m2"></SimpleData>
							<SimpleData name="ABUNDANCE.per.m2">1412860000000</SimpleData>
							<SimpleData name="DATA.TYPE.ABUNDANCE">Raw</SimpleData>
							<SimpleData name="CARBON.WT.mg.C.per.m2">28.25722422</SimpleData>
							<SimpleData name="FINAL.UNIT.TYPE">organic C</SimpleData>
							<SimpleData name="CONVERSION.FACTOR.from.Rowe.1983">*1</SimpleData>
							<SimpleData name="FINAL.BIOMASS..mg.C.per.m2">28.25722422</SimpleData>
							<SimpleData name="REFERENCE">Danovaro et al 2008</SimpleData>
							<SimpleData name="PROVIDER">Roberto Danovaro</SimpleData>
							<SimpleData name="BODY.OF.WATER">SE Pacific</SimpleData>
							<SimpleData name="REGION">SE Pacific</SimpleData>
							<SimpleData name="OCEAN.SEA">Pacific</SimpleData>
							<SimpleData name="HABITAT">Continental Slope</SimpleData>
							<SimpleData name="COMMENTS"></SimpleData>
						</SchemaData>
					</ExtendedData>
					<Point>
						<coordinates>-80.375,-33.90333333,0</coordinates>
					</Point>
				</Placemark>
				<Placemark>
					<styleUrl>#m_ylw-pushpin</styleUrl>
					<ExtendedData>
						<SchemaData schemaUrl="#data">
							<SimpleData name="CATEGORY">bacteria</SimpleData>
							<SimpleData name="STATION"></SimpleData>
							<SimpleData name="REPLICATION"></SimpleData>
							<SimpleData name="DEPTH.m">3050</SimpleData>
							<SimpleData name="DATE.UTC"></SimpleData>
							<SimpleData name="GEAR">Pistone Core</SimpleData>
							<SimpleData name="GEAR2">Core</SimpleData>
							<SimpleData name="SEDIMENT.DEPTH.cm">10</SimpleData>
							<SimpleData name="AREA.m2"></SimpleData>
							<SimpleData name="ABUNDANCE.per.m2">1515530000000</SimpleData>
							<SimpleData name="DATA.TYPE.ABUNDANCE">Raw</SimpleData>
							<SimpleData name="CARBON.WT.mg.C.per.m2">33.25722422</SimpleData>
							<SimpleData name="FINAL.UNIT.TYPE">organic C</SimpleData>
							<SimpleData name="CONVERSION.FACTOR.from.Rowe.1983">*1</SimpleData>
							<SimpleData name="FINAL.BIOMASS..mg.C.per.m2">33.25722422</SimpleData>
							<SimpleData name="REFERENCE">Danovaro et al 2008</SimpleData>
							<SimpleData name="PROVIDER">Roberto Danovaro</SimpleData>
							<SimpleData name="BODY.OF.WATER">SE Pacific</SimpleData>
							<SimpleData name="REGION">SE Pacific</SimpleData>
							<SimpleData name="OCEAN.SEA">Pacific</SimpleData>
							<SimpleData name="HABITAT">Continental Slope</SimpleData>
							<SimpleData name="COMMENTS"></SimpleData>
						</SchemaData>
					</ExtendedData>
					<Point>
						<coordinates>-80.375,-33.90333333,0</coordinates>
					</Point>
				</Placemark>
				<Placemark>
					<styleUrl>#m_ylw-pushpin</styleUrl>
					<ExtendedData>
						<SchemaData schemaUrl="#data">
							<SimpleData name="CATEGORY">bacteria</SimpleData>
							<SimpleData name="STATION"></SimpleData>
							<SimpleData name="REPLICATION"></SimpleData>
							<SimpleData name="DEPTH.m">3050</SimpleData>
							<SimpleData name="DATE.UTC"></SimpleData>
							<SimpleData name="GEAR">Pistone Core</SimpleData>
							<SimpleData name="GEAR2">Core</SimpleData>
							<SimpleData name="SEDIMENT.DEPTH.cm">10</SimpleData>
							<SimpleData name="AREA.m2"></SimpleData>
							<SimpleData name="ABUNDANCE.per.m2">1310190000000</SimpleData>
							<SimpleData name="DATA.TYPE.ABUNDANCE">Raw</SimpleData>
							<SimpleData name="CARBON.WT.mg.C.per.m2">23.25722422</SimpleData>
							<SimpleData name="FINAL.UNIT.TYPE">organic C</SimpleData>
							<SimpleData name="CONVERSION.FACTOR.from.Rowe.1983">*1</SimpleData>
							<SimpleData name="FINAL.BIOMASS..mg.C.per.m2">23.25722422</SimpleData>
							<SimpleData name="REFERENCE">Danovaro et al 2008</SimpleData>
							<SimpleData name="PROVIDER">Roberto Danovaro</SimpleData>
							<SimpleData name="BODY.OF.WATER">SE Pacific</SimpleData>
							<SimpleData name="REGION">SE Pacific</SimpleData>
							<SimpleData name="OCEAN.SEA">Pacific</SimpleData>
							<SimpleData name="HABITAT">Continental Slope</SimpleData>
							<SimpleData name="COMMENTS"></SimpleData>
						</SchemaData>
					</ExtendedData>
					<Point>
						<coordinates>-80.375,-33.90333333,0</coordinates>
					</Point>
				</Placemark>
				<Placemark>
					<styleUrl>#m_ylw-pushpin</styleUrl>
					<ExtendedData>
						<SchemaData schemaUrl="#data">
							<SimpleData name="CATEGORY">bacteria</SimpleData>
							<SimpleData name="STATION"></SimpleData>
							<SimpleData name="REPLICATION"></SimpleData>
							<SimpleData name="DEPTH.m">570</SimpleData>
							<SimpleData name="DATE.UTC"></SimpleData>
							<SimpleData name="GEAR">Pistone Core</SimpleData>
							<SimpleData name="GEAR2">Core</SimpleData>
							<SimpleData name="SEDIMENT.DEPTH.cm">10</SimpleData>
							<SimpleData name="AREA.m2"></SimpleData>
							<SimpleData name="ABUNDANCE.per.m2">1183640000000</SimpleData>
							<SimpleData name="DATA.TYPE.ABUNDANCE">Raw</SimpleData>
							<SimpleData name="CARBON.WT.mg.C.per.m2">146</SimpleData>
							<SimpleData name="FINAL.UNIT.TYPE">organic C</SimpleData>
							<SimpleData name="CONVERSION.FACTOR.from.Rowe.1983">*1</SimpleData>
							<SimpleData name="FINAL.BIOMASS..mg.C.per.m2">146</SimpleData>
							<SimpleData name="REFERENCE">Danovaro et al 2008</SimpleData>
							<SimpleData name="PROVIDER">Roberto Danovaro</SimpleData>
							<SimpleData name="BODY.OF.WATER">SE Pacific</SimpleData>
							<SimpleData name="REGION">SE Pacific</SimpleData>
							<SimpleData name="OCEAN.SEA">Pacific</SimpleData>
							<SimpleData name="HABITAT">Continental Slope</SimpleData>
							<SimpleData name="COMMENTS"></SimpleData>
						</SchemaData>
					</ExtendedData>
					<Point>
						<coordinates>-80.82666666999999,-33.69,0</coordinates>
					</Point>
				</Placemark>
				<Placemark>
					<styleUrl>#m_ylw-pushpin</styleUrl>
					<ExtendedData>
						<SchemaData schemaUrl="#data">
							<SimpleData name="CATEGORY">bacteria</SimpleData>
							<SimpleData name="STATION"></SimpleData>
							<SimpleData name="REPLICATION"></SimpleData>
							<SimpleData name="DEPTH.m">570</SimpleData>
							<SimpleData name="DATE.UTC"></SimpleData>
							<SimpleData name="GEAR">Pistone Core</SimpleData>
							<SimpleData name="GEAR2">Core</SimpleData>
							<SimpleData name="SEDIMENT.DEPTH.cm">10</SimpleData>
							<SimpleData name="AREA.m2"></SimpleData>
							<SimpleData name="ABUNDANCE.per.m2">1247190000000</SimpleData>
							<SimpleData name="DATA.TYPE.ABUNDANCE">Raw</SimpleData>
							<SimpleData name="CARBON.WT.mg.C.per.m2">171.6</SimpleData>
							<SimpleData name="FINAL.UNIT.TYPE">organic C</SimpleData>
							<SimpleData name="CONVERSION.FACTOR.from.Rowe.1983">*1</SimpleData>
							<SimpleData name="FINAL.BIOMASS..mg.C.per.m2">171.6</SimpleData>
							<SimpleData name="REFERENCE">Danovaro et al 2008</SimpleData>
							<SimpleData name="PROVIDER">Roberto Danovaro</SimpleData>
							<SimpleData name="BODY.OF.WATER">SE Pacific</SimpleData>
							<SimpleData name="REGION">SE Pacific</SimpleData>
							<SimpleData name="OCEAN.SEA">Pacific</SimpleData>
							<SimpleData name="HABITAT">Continental Slope</SimpleData>
							<SimpleData name="COMMENTS"></SimpleData>
						</SchemaData>
					</ExtendedData>
					<Point>
						<coordinates>-80.82666666999999,-33.69,0</coordinates>
					</Point>
				</Placemark>
				<Placemark>
					<styleUrl>#m_ylw-pushpin</styleUrl>
					<ExtendedData>
						<SchemaData schemaUrl="#data">
							<SimpleData name="CATEGORY">bacteria</SimpleData>
							<SimpleData name="STATION"></SimpleData>
							<SimpleData name="REPLICATION"></SimpleData>
							<SimpleData name="DEPTH.m">570</SimpleData>
							<SimpleData name="DATE.UTC"></SimpleData>
							<SimpleData name="GEAR">Pistone Core</SimpleData>
							<SimpleData name="GEAR2">Core</SimpleData>
							<SimpleData name="SEDIMENT.DEPTH.cm">10</SimpleData>
							<SimpleData name="AREA.m2"></SimpleData>
							<SimpleData name="ABUNDANCE.per.m2">1120090000000</SimpleData>
							<SimpleData name="DATA.TYPE.ABUNDANCE">Raw</SimpleData>
							<SimpleData name="CARBON.WT.mg.C.per.m2">120.4</SimpleData>
							<SimpleData name="FINAL.UNIT.TYPE">organic C</SimpleData>
							<SimpleData name="CONVERSION.FACTOR.from.Rowe.1983">*1</SimpleData>
							<SimpleData name="FINAL.BIOMASS..mg.C.per.m2">120.4</SimpleData>
							<SimpleData name="REFERENCE">Danovaro et al 2008</SimpleData>
							<SimpleData name="PROVIDER">Roberto Danovaro</SimpleData>
							<SimpleData name="BODY.OF.WATER">SE Pacific</SimpleData>
							<SimpleData name="REGION">SE Pacific</SimpleData>
							<SimpleData name="OCEAN.SEA">Pacific</SimpleData>
							<SimpleData name="HABITAT">Continental Slope</SimpleData>
							<SimpleData name="COMMENTS"></SimpleData>
						</SchemaData>
					</ExtendedData>
					<Point>
						<coordinates>-80.82666666999999,-33.69,0</coordinates>
					</Point>
				</Placemark>
				<Placemark>
					<styleUrl>#m_ylw-pushpin</styleUrl>
					<ExtendedData>
						<SchemaData schemaUrl="#data">
							<SimpleData name="CATEGORY">bacteria</SimpleData>
							<SimpleData name="STATION"></SimpleData>
							<SimpleData name="REPLICATION"></SimpleData>
							<SimpleData name="DEPTH.m">2755</SimpleData>
							<SimpleData name="DATE.UTC"></SimpleData>
							<SimpleData name="GEAR">Box Core</SimpleData>
							<SimpleData name="GEAR2">Core</SimpleData>
							<SimpleData name="SEDIMENT.DEPTH.cm">10</SimpleData>
							<SimpleData name="AREA.m2"></SimpleData>
							<SimpleData name="ABUNDANCE.per.m2">2020630000000</SimpleData>
							<SimpleData name="DATA.TYPE.ABUNDANCE">Raw</SimpleData>
							<SimpleData name="CARBON.WT.mg.C.per.m2">73.67861039</SimpleData>
							<SimpleData name="FINAL.UNIT.TYPE">organic C</SimpleData>
							<SimpleData name="CONVERSION.FACTOR.from.Rowe.1983">*1</SimpleData>
							<SimpleData name="FINAL.BIOMASS..mg.C.per.m2">73.67861039</SimpleData>
							<SimpleData name="REFERENCE">Danovaro et al 2008</SimpleData>
							<SimpleData name="PROVIDER">Roberto Danovaro</SimpleData>
							<SimpleData name="BODY.OF.WATER">W Mediterranean</SimpleData>
							<SimpleData name="REGION">W Mediterranean</SimpleData>
							<SimpleData name="OCEAN.SEA">Mediterranean</SimpleData>
							<SimpleData name="HABITAT">Continental Slope</SimpleData>
							<SimpleData name="COMMENTS"></SimpleData>
						</SchemaData>
					</ExtendedData>
					<Point>
						<coordinates>4.952333333,40.5665,0</coordinates>
					</Point>
				</Placemark>
				<Placemark>
					<styleUrl>#m_ylw-pushpin</styleUrl>
					<ExtendedData>
						<SchemaData schemaUrl="#data">
							<SimpleData name="CATEGORY">bacteria</SimpleData>
							<SimpleData name="STATION"></SimpleData>
							<SimpleData name="REPLICATION"></SimpleData>
							<SimpleData name="DEPTH.m">2755</SimpleData>
							<SimpleData name="DATE.UTC"></SimpleData>
							<SimpleData name="GEAR">Box Core</SimpleData>
							<SimpleData name="GEAR2">Core</SimpleData>
							<SimpleData name="SEDIMENT.DEPTH.cm">10</SimpleData>
							<SimpleData name="AREA.m2"></SimpleData>
							<SimpleData name="ABUNDANCE.per.m2">3027690000000</SimpleData>
							<SimpleData name="DATA.TYPE.ABUNDANCE">Raw</SimpleData>
							<SimpleData name="CARBON.WT.mg.C.per.m2">102.9586104</SimpleData>
							<SimpleData name="FINAL.UNIT.TYPE">organic C</SimpleData>
							<SimpleData name="CONVERSION.FACTOR.from.Rowe.1983">*1</SimpleData>
							<SimpleData name="FINAL.BIOMASS..mg.C.per.m2">102.9586104</SimpleData>
							<SimpleData name="REFERENCE">Danovaro et al 2008</SimpleData>
							<SimpleData name="PROVIDER">Roberto Danovaro</SimpleData>
							<SimpleData name="BODY.OF.WATER">W Mediterranean</SimpleData>
							<SimpleData name="REGION">W Mediterranean</SimpleData>
							<SimpleData name="OCEAN.SEA">Mediterranean</SimpleData>
							<SimpleData name="HABITAT">Continental Slope</SimpleData>
							<SimpleData name="COMMENTS"></SimpleData>
						</SchemaData>
					</ExtendedData>
					<Point>
						<coordinates>4.952333333,40.5665,0</coordinates>
					</Point>
				</Placemark>
				<Placemark>
					<styleUrl>#m_ylw-pushpin</styleUrl>
					<ExtendedData>
						<SchemaData schemaUrl="#data">
							<SimpleData name="CATEGORY">bacteria</SimpleData>
							<SimpleData name="STATION"></SimpleData>
							<SimpleData name="REPLICATION"></SimpleData>
							<SimpleData name="DEPTH.m">2755</SimpleData>
							<SimpleData name="DATE.UTC"></SimpleData>
							<SimpleData name="GEAR">Box Core</SimpleData>
							<SimpleData name="GEAR2">Core</SimpleData>
							<SimpleData name="SEDIMENT.DEPTH.cm">10</SimpleData>
							<SimpleData name="AREA.m2"></SimpleData>
							<SimpleData name="ABUNDANCE.per.m2">1013580000000</SimpleData>
							<SimpleData name="DATA.TYPE.ABUNDANCE">Raw</SimpleData>
							<SimpleData name="CARBON.WT.mg.C.per.m2">44.39861039</SimpleData>
							<SimpleData name="FINAL.UNIT.TYPE">organic C</SimpleData>
							<SimpleData name="CONVERSION.FACTOR.from.Rowe.1983">*1</SimpleData>
							<SimpleData name="FINAL.BIOMASS..mg.C.per.m2">44.39861039</SimpleData>
							<SimpleData name="REFERENCE">Danovaro et al 2008</SimpleData>
							<SimpleData name="PROVIDER">Roberto Danovaro</SimpleData>
							<SimpleData name="BODY.OF.WATER">W Mediterranean</SimpleData>
							<SimpleData name="REGION">W Mediterranean</SimpleData>
							<SimpleData name="OCEAN.SEA">Mediterranean</SimpleData>
							<SimpleData name="HABITAT">Continental Slope</SimpleData>
							<SimpleData name="COMMENTS"></SimpleData>
						</SchemaData>
					</ExtendedData>
					<Point>
						<coordinates>4.952333333,40.5665,0</coordinates>
					</Point>
				</Placemark>
				<Placemark>
					<styleUrl>#m_ylw-pushpin</styleUrl>
					<ExtendedData>
						<SchemaData schemaUrl="#data">
							<SimpleData name="CATEGORY">bacteria</SimpleData>
							<SimpleData name="STATION"></SimpleData>
							<SimpleData name="REPLICATION"></SimpleData>
							<SimpleData name="DEPTH.m">2850</SimpleData>
							<SimpleData name="DATE.UTC"></SimpleData>
							<SimpleData name="GEAR">Box Core</SimpleData>
							<SimpleData name="GEAR2">Core</SimpleData>
							<SimpleData name="SEDIMENT.DEPTH.cm">10</SimpleData>
							<SimpleData name="AREA.m2"></SimpleData>
							<SimpleData name="ABUNDANCE.per.m2">5232580000000</SimpleData>
							<SimpleData name="DATA.TYPE.ABUNDANCE">Raw</SimpleData>
							<SimpleData name="CARBON.WT.mg.C.per.m2">179.4211171</SimpleData>
							<SimpleData name="FINAL.UNIT.TYPE">organic C</SimpleData>
							<SimpleData name="CONVERSION.FACTOR.from.Rowe.1983">*1</SimpleData>
							<SimpleData name="FINAL.BIOMASS..mg.C.per.m2">179.4211171</SimpleData>
							<SimpleData name="REFERENCE">Danovaro et al 2008</SimpleData>
							<SimpleData name="PROVIDER">Roberto Danovaro</SimpleData>
							<SimpleData name="BODY.OF.WATER">W Mediterranean</SimpleData>
							<SimpleData name="REGION">W Mediterranean</SimpleData>
							<SimpleData name="OCEAN.SEA">Mediterranean</SimpleData>
							<SimpleData name="HABITAT">Continental Slope</SimpleData>
							<SimpleData name="COMMENTS"></SimpleData>
						</SchemaData>
					</ExtendedData>
					<Point>
						<coordinates>6.895333333,38.40083333,0</coordinates>
					</Point>
				</Placemark>
				<Placemark>
					<styleUrl>#m_ylw-pushpin</styleUrl>
					<ExtendedData>
						<SchemaData schemaUrl="#data">
							<SimpleData name="CATEGORY">bacteria</SimpleData>
							<SimpleData name="STATION"></SimpleData>
							<SimpleData name="REPLICATION"></SimpleData>
							<SimpleData name="DEPTH.m">2850</SimpleData>
							<SimpleData name="DATE.UTC"></SimpleData>
							<SimpleData name="GEAR">Box Core</SimpleData>
							<SimpleData name="GEAR2">Core</SimpleData>
							<SimpleData name="SEDIMENT.DEPTH.cm">10</SimpleData>
							<SimpleData name="AREA.m2"></SimpleData>
							<SimpleData name="ABUNDANCE.per.m2">6009970000000</SimpleData>
							<SimpleData name="DATA.TYPE.ABUNDANCE">Raw</SimpleData>
							<SimpleData name="CARBON.WT.mg.C.per.m2">224.2211171</SimpleData>
							<SimpleData name="FINAL.UNIT.TYPE">organic C</SimpleData>
							<SimpleData name="CONVERSION.FACTOR.from.Rowe.1983">*1</SimpleData>
							<SimpleData name="FINAL.BIOMASS..mg.C.per.m2">224.2211171</SimpleData>
							<SimpleData name="REFERENCE">Danovaro et al 2008</SimpleData>
							<SimpleData name="PROVIDER">Roberto Danovaro</SimpleData>
							<SimpleData name="BODY.OF.WATER">W Mediterranean</SimpleData>
							<SimpleData name="REGION">W Mediterranean</SimpleData>
							<SimpleData name="OCEAN.SEA">Mediterranean</SimpleData>
							<SimpleData name="HABITAT">Continental Slope</SimpleData>
							<SimpleData name="COMMENTS"></SimpleData>
						</SchemaData>
					</ExtendedData>
					<Point>
						<coordinates>6.895333333,38.40083333,0</coordinates>
					</Point>
				</Placemark>
				<Placemark>
					<styleUrl>#m_ylw-pushpin</styleUrl>
					<ExtendedData>
						<SchemaData schemaUrl="#data">
							<SimpleData name="CATEGORY">bacteria</SimpleData>
							<SimpleData name="STATION"></SimpleData>
							<SimpleData name="REPLICATION"></SimpleData>
							<SimpleData name="DEPTH.m">2850</SimpleData>
							<SimpleData name="DATE.UTC"></SimpleData>
							<SimpleData name="GEAR">Box Core</SimpleData>
							<SimpleData name="GEAR2">Core</SimpleData>
							<SimpleData name="SEDIMENT.DEPTH.cm">10</SimpleData>
							<SimpleData name="AREA.m2"></SimpleData>
							<SimpleData name="ABUNDANCE.per.m2">4455180000000</SimpleData>
							<SimpleData name="DATA.TYPE.ABUNDANCE">Raw</SimpleData>
							<SimpleData name="CARBON.WT.mg.C.per.m2">134.6211171</SimpleData>
							<SimpleData name="FINAL.UNIT.TYPE">organic C</SimpleData>
							<SimpleData name="CONVERSION.FACTOR.from.Rowe.1983">*1</SimpleData>
							<SimpleData name="FINAL.BIOMASS..mg.C.per.m2">134.6211171</SimpleData>
							<SimpleData name="REFERENCE">Danovaro et al 2008</SimpleData>
							<SimpleData name="PROVIDER">Roberto Danovaro</SimpleData>
							<SimpleData name="BODY.OF.WATER">W Mediterranean</SimpleData>
							<SimpleData name="REGION">W Mediterranean</SimpleData>
							<SimpleData name="OCEAN.SEA">Mediterranean</SimpleData>
							<SimpleData name="HABITAT">Continental Slope</SimpleData>
							<SimpleData name="COMMENTS"></SimpleData>
						</SchemaData>
					</ExtendedData>
					<Point>
						<coordinates>6.895333333,38.40083333,0</coordinates>
					</Point>
				</Placemark>
				<Placemark>
					<styleUrl>#m_ylw-pushpin</styleUrl>
					<ExtendedData>
						<SchemaData schemaUrl="#data">
							<SimpleData name="CATEGORY">bacteria</SimpleData>
							<SimpleData name="STATION"></SimpleData>
							<SimpleData name="REPLICATION"></SimpleData>
							<SimpleData name="DEPTH.m">1290</SimpleData>
							<SimpleData name="DATE.UTC"></SimpleData>
							<SimpleData name="GEAR">Box Core</SimpleData>
							<SimpleData name="GEAR2">Core</SimpleData>
							<SimpleData name="SEDIMENT.DEPTH.cm">10</SimpleData>
							<SimpleData name="AREA.m2"></SimpleData>
							<SimpleData name="ABUNDANCE.per.m2">5161310000000</SimpleData>
							<SimpleData name="DATA.TYPE.ABUNDANCE">Raw</SimpleData>
							<SimpleData name="CARBON.WT.mg.C.per.m2">243.9768323</SimpleData>
							<SimpleData name="FINAL.UNIT.TYPE">organic C</SimpleData>
							<SimpleData name="CONVERSION.FACTOR.from.Rowe.1983">*1</SimpleData>
							<SimpleData name="FINAL.BIOMASS..mg.C.per.m2">243.9768323</SimpleData>
							<SimpleData name="REFERENCE">Danovaro et al 2008</SimpleData>
							<SimpleData name="PROVIDER">Roberto Danovaro</SimpleData>
							<SimpleData name="BODY.OF.WATER">E Mediterranean</SimpleData>
							<SimpleData name="REGION">E Mediterranean</SimpleData>
							<SimpleData name="OCEAN.SEA">Mediterranean</SimpleData>
							<SimpleData name="HABITAT">Continental Slope</SimpleData>
							<SimpleData name="COMMENTS"></SimpleData>
						</SchemaData>
					</ExtendedData>
					<Point>
						<coordinates>12.24616667,36.611,0</coordinates>
					</Point>
				</Placemark>
				<Placemark>
					<styleUrl>#m_ylw-pushpin</styleUrl>
					<ExtendedData>
						<SchemaData schemaUrl="#data">
							<SimpleData name="CATEGORY">bacteria</SimpleData>
							<SimpleData name="STATION"></SimpleData>
							<SimpleData name="REPLICATION"></SimpleData>
							<SimpleData name="DEPTH.m">1290</SimpleData>
							<SimpleData name="DATE.UTC"></SimpleData>
							<SimpleData name="GEAR">Box Core</SimpleData>
							<SimpleData name="GEAR2">Core</SimpleData>
							<SimpleData name="SEDIMENT.DEPTH.cm">10</SimpleData>
							<SimpleData name="AREA.m2"></SimpleData>
							<SimpleData name="ABUNDANCE.per.m2">6123710000000</SimpleData>
							<SimpleData name="DATA.TYPE.ABUNDANCE">Raw</SimpleData>
							<SimpleData name="CARBON.WT.mg.C.per.m2">290.7768323</SimpleData>
							<SimpleData name="FINAL.UNIT.TYPE">organic C</SimpleData>
							<SimpleData name="CONVERSION.FACTOR.from.Rowe.1983">*1</SimpleData>
							<SimpleData name="FINAL.BIOMASS..mg.C.per.m2">290.7768323</SimpleData>
							<SimpleData name="REFERENCE">Danovaro et al 2008</SimpleData>
							<SimpleData name="PROVIDER">Roberto Danovaro</SimpleData>
							<SimpleData name="BODY.OF.WATER">E Mediterranean</SimpleData>
							<SimpleData name="REGION">E Mediterranean</SimpleData>
							<SimpleData name="OCEAN.SEA">Mediterranean</SimpleData>
							<SimpleData name="HABITAT">Continental Slope</SimpleData>
							<SimpleData name="COMMENTS"></SimpleData>
						</SchemaData>
					</ExtendedData>
					<Point>
						<coordinates>12.24616667,36.611,0</coordinates>
					</Point>
				</Placemark>
				<Placemark>
					<styleUrl>#m_ylw-pushpin</styleUrl>
					<ExtendedData>
						<SchemaData schemaUrl="#data">
							<SimpleData name="CATEGORY">bacteria</SimpleData>
							<SimpleData name="STATION"></SimpleData>
							<SimpleData name="REPLICATION"></SimpleData>
							<SimpleData name="DEPTH.m">1290</SimpleData>
							<SimpleData name="DATE.UTC"></SimpleData>
							<SimpleData name="GEAR">Box Core</SimpleData>
							<SimpleData name="GEAR2">Core</SimpleData>
							<SimpleData name="SEDIMENT.DEPTH.cm">10</SimpleData>
							<SimpleData name="AREA.m2"></SimpleData>
							<SimpleData name="ABUNDANCE.per.m2">4198910000000</SimpleData>
							<SimpleData name="DATA.TYPE.ABUNDANCE">Raw</SimpleData>
							<SimpleData name="CARBON.WT.mg.C.per.m2">197.1768323</SimpleData>
							<SimpleData name="FINAL.UNIT.TYPE">organic C</SimpleData>
							<SimpleData name="CONVERSION.FACTOR.from.Rowe.1983">*1</SimpleData>
							<SimpleData name="FINAL.BIOMASS..mg.C.per.m2">197.1768323</SimpleData>
							<SimpleData name="REFERENCE">Danovaro et al 2008</SimpleData>
							<SimpleData name="PROVIDER">Roberto Danovaro</SimpleData>
							<SimpleData name="BODY.OF.WATER">E Mediterranean</SimpleData>
							<SimpleData name="REGION">E Mediterranean</SimpleData>
							<SimpleData name="OCEAN.SEA">Mediterranean</SimpleData>
							<SimpleData name="HABITAT">Continental Slope</SimpleData>
							<SimpleData name="COMMENTS"></SimpleData>
						</SchemaData>
					</ExtendedData>
					<Point>
						<coordinates>12.24616667,36.611,0</coordinates>
					</Point>
				</Placemark>
				<Placemark>
					<styleUrl>#m_ylw-pushpin</styleUrl>
					<ExtendedData>
						<SchemaData schemaUrl="#data">
							<SimpleData name="CATEGORY">bacteria</SimpleData>
							<SimpleData name="STATION"></SimpleData>
							<SimpleData name="REPLICATION"></SimpleData>
							<SimpleData name="DEPTH.m">4000</SimpleData>
							<SimpleData name="DATE.UTC"></SimpleData>
							<SimpleData name="GEAR">Box Core</SimpleData>
							<SimpleData name="GEAR2">Core</SimpleData>
							<SimpleData name="SEDIMENT.DEPTH.cm">10</SimpleData>
							<SimpleData name="AREA.m2"></SimpleData>
							<SimpleData name="ABUNDANCE.per.m2">1473530000000</SimpleData>
							<SimpleData name="DATA.TYPE.ABUNDANCE">Raw</SimpleData>
							<SimpleData name="CARBON.WT.mg.C.per.m2">50.302942</SimpleData>
							<SimpleData name="FINAL.UNIT.TYPE">organic C</SimpleData>
							<SimpleData name="CONVERSION.FACTOR.from.Rowe.1983">*1</SimpleData>
							<SimpleData name="FINAL.BIOMASS..mg.C.per.m2">50.302942</SimpleData>
							<SimpleData name="REFERENCE">Danovaro et al 2008</SimpleData>
							<SimpleData name="PROVIDER">Roberto Danovaro</SimpleData>
							<SimpleData name="BODY.OF.WATER">Ionian Sea</SimpleData>
							<SimpleData name="REGION">E Mediterranean</SimpleData>
							<SimpleData name="OCEAN.SEA">Mediterranean</SimpleData>
							<SimpleData name="HABITAT">Continental Slope</SimpleData>
							<SimpleData name="COMMENTS"></SimpleData>
						</SchemaData>
					</ExtendedData>
					<Point>
						<coordinates>17.3895,35.61966667,0</coordinates>
					</Point>
				</Placemark>
				<Placemark>
					<styleUrl>#m_ylw-pushpin</styleUrl>
					<ExtendedData>
						<SchemaData schemaUrl="#data">
							<SimpleData name="CATEGORY">bacteria</SimpleData>
							<SimpleData name="STATION"></SimpleData>
							<SimpleData name="REPLICATION"></SimpleData>
							<SimpleData name="DEPTH.m">4000</SimpleData>
							<SimpleData name="DATE.UTC"></SimpleData>
							<SimpleData name="GEAR">Box Core</SimpleData>
							<SimpleData name="GEAR2">Core</SimpleData>
							<SimpleData name="SEDIMENT.DEPTH.cm">10</SimpleData>
							<SimpleData name="AREA.m2"></SimpleData>
							<SimpleData name="ABUNDANCE.per.m2">1609710000000</SimpleData>
							<SimpleData name="DATA.TYPE.ABUNDANCE">Raw</SimpleData>
							<SimpleData name="CARBON.WT.mg.C.per.m2">51.942942</SimpleData>
							<SimpleData name="FINAL.UNIT.TYPE">organic C</SimpleData>
							<SimpleData name="CONVERSION.FACTOR.from.Rowe.1983">*1</SimpleData>
							<SimpleData name="FINAL.BIOMASS..mg.C.per.m2">51.942942</SimpleData>
							<SimpleData name="REFERENCE">Danovaro et al 2008</SimpleData>
							<SimpleData name="PROVIDER">Roberto Danovaro</SimpleData>
							<SimpleData name="BODY.OF.WATER">Ionian Sea</SimpleData>
							<SimpleData name="REGION">E Mediterranean</SimpleData>
							<SimpleData name="OCEAN.SEA">Mediterranean</SimpleData>
							<SimpleData name="HABITAT">Continental Slope</SimpleData>
							<SimpleData name="COMMENTS"></SimpleData>
						</SchemaData>
					</ExtendedData>
					<Point>
						<coordinates>17.3895,35.61966667,0</coordinates>
					</Point>
				</Placemark>
				<Placemark>
					<styleUrl>#m_ylw-pushpin</styleUrl>
					<ExtendedData>
						<SchemaData schemaUrl="#data">
							<SimpleData name="CATEGORY">bacteria</SimpleData>
							<SimpleData name="STATION"></SimpleData>
							<SimpleData name="REPLICATION"></SimpleData>
							<SimpleData name="DEPTH.m">4000</SimpleData>
							<SimpleData name="DATE.UTC"></SimpleData>
							<SimpleData name="GEAR">Box Core</SimpleData>
							<SimpleData name="GEAR2">Core</SimpleData>
							<SimpleData name="SEDIMENT.DEPTH.cm">10</SimpleData>
							<SimpleData name="AREA.m2"></SimpleData>
							<SimpleData name="ABUNDANCE.per.m2">1337360000000</SimpleData>
							<SimpleData name="DATA.TYPE.ABUNDANCE">Raw</SimpleData>
							<SimpleData name="CARBON.WT.mg.C.per.m2">48.662942</SimpleData>
							<SimpleData name="FINAL.UNIT.TYPE">organic C</SimpleData>
							<SimpleData name="CONVERSION.FACTOR.from.Rowe.1983">*1</SimpleData>
							<SimpleData name="FINAL.BIOMASS..mg.C.per.m2">48.662942</SimpleData>
							<SimpleData name="REFERENCE">Danovaro et al 2008</SimpleData>
							<SimpleData name="PROVIDER">Roberto Danovaro</SimpleData>
							<SimpleData name="BODY.OF.WATER">Ionian Sea</SimpleData>
							<SimpleData name="REGION">E Mediterranean</SimpleData>
							<SimpleData name="OCEAN.SEA">Mediterranean</SimpleData>
							<SimpleData name="HABITAT">Continental Slope</SimpleData>
							<SimpleData name="COMMENTS"></SimpleData>
						</SchemaData>
					</ExtendedData>
					<Point>
						<coordinates>17.3895,35.61966667,0</coordinates>
					</Point>
				</Placemark>
				<Placemark>
					<styleUrl>#m_ylw-pushpin</styleUrl>
					<ExtendedData>
						<SchemaData schemaUrl="#data">
							<SimpleData name="CATEGORY">bacteria</SimpleData>
							<SimpleData name="STATION"></SimpleData>
							<SimpleData name="REPLICATION"></SimpleData>
							<SimpleData name="DEPTH.m">3200</SimpleData>
							<SimpleData name="DATE.UTC"></SimpleData>
							<SimpleData name="GEAR">Box Core</SimpleData>
							<SimpleData name="GEAR2">Core</SimpleData>
							<SimpleData name="SEDIMENT.DEPTH.cm">10</SimpleData>
							<SimpleData name="AREA.m2"></SimpleData>
							<SimpleData name="ABUNDANCE.per.m2">4529270000000</SimpleData>
							<SimpleData name="DATA.TYPE.ABUNDANCE">Raw</SimpleData>
							<SimpleData name="CARBON.WT.mg.C.per.m2">163.9615419</SimpleData>
							<SimpleData name="FINAL.UNIT.TYPE">organic C</SimpleData>
							<SimpleData name="CONVERSION.FACTOR.from.Rowe.1983">*1</SimpleData>
							<SimpleData name="FINAL.BIOMASS..mg.C.per.m2">163.9615419</SimpleData>
							<SimpleData name="REFERENCE">Danovaro et al 2008</SimpleData>
							<SimpleData name="PROVIDER">Roberto Danovaro</SimpleData>
							<SimpleData name="BODY.OF.WATER">Ionian Sea</SimpleData>
							<SimpleData name="REGION">E Mediterranean</SimpleData>
							<SimpleData name="OCEAN.SEA">Mediterranean</SimpleData>
							<SimpleData name="HABITAT">Continental Slope</SimpleData>
							<SimpleData name="COMMENTS"></SimpleData>
						</SchemaData>
					</ExtendedData>
					<Point>
						<coordinates>20.14666667,35.70633333,0</coordinates>
					</Point>
				</Placemark>
				<Placemark>
					<styleUrl>#m_ylw-pushpin</styleUrl>
					<ExtendedData>
						<SchemaData schemaUrl="#data">
							<SimpleData name="CATEGORY">bacteria</SimpleData>
							<SimpleData name="STATION"></SimpleData>
							<SimpleData name="REPLICATION"></SimpleData>
							<SimpleData name="DEPTH.m">3200</SimpleData>
							<SimpleData name="DATE.UTC"></SimpleData>
							<SimpleData name="GEAR">Box Core</SimpleData>
							<SimpleData name="GEAR2">Core</SimpleData>
							<SimpleData name="SEDIMENT.DEPTH.cm">10</SimpleData>
							<SimpleData name="AREA.m2"></SimpleData>
							<SimpleData name="ABUNDANCE.per.m2">5520910000000</SimpleData>
							<SimpleData name="DATA.TYPE.ABUNDANCE">Raw</SimpleData>
							<SimpleData name="CARBON.WT.mg.C.per.m2">182.2015419</SimpleData>
							<SimpleData name="FINAL.UNIT.TYPE">organic C</SimpleData>
							<SimpleData name="CONVERSION.FACTOR.from.Rowe.1983">*1</SimpleData>
							<SimpleData name="FINAL.BIOMASS..mg.C.per.m2">182.2015419</SimpleData>
							<SimpleData name="REFERENCE">Danovaro et al 2008</SimpleData>
							<SimpleData name="PROVIDER">Roberto Danovaro</SimpleData>
							<SimpleData name="BODY.OF.WATER">Ionian Sea</SimpleData>
							<SimpleData name="REGION">E Mediterranean</SimpleData>
							<SimpleData name="OCEAN.SEA">Mediterranean</SimpleData>
							<SimpleData name="HABITAT">Continental Slope</SimpleData>
							<SimpleData name="COMMENTS"></SimpleData>
						</SchemaData>
					</ExtendedData>
					<Point>
						<coordinates>20.14666667,35.70633333,0</coordinates>
					</Point>
				</Placemark>
				<Placemark>
					<styleUrl>#m_ylw-pushpin</styleUrl>
					<ExtendedData>
						<SchemaData schemaUrl="#data">
							<SimpleData name="CATEGORY">bacteria</SimpleData>
							<SimpleData name="STATION"></SimpleData>
							<SimpleData name="REPLICATION"></SimpleData>
							<SimpleData name="DEPTH.m">3200</SimpleData>
							<SimpleData name="DATE.UTC"></SimpleData>
							<SimpleData name="GEAR">Box Core</SimpleData>
							<SimpleData name="GEAR2">Core</SimpleData>
							<SimpleData name="SEDIMENT.DEPTH.cm">10</SimpleData>
							<SimpleData name="AREA.m2"></SimpleData>
							<SimpleData name="ABUNDANCE.per.m2">3537630000000</SimpleData>
							<SimpleData name="DATA.TYPE.ABUNDANCE">Raw</SimpleData>
							<SimpleData name="CARBON.WT.mg.C.per.m2">145.7215419</SimpleData>
							<SimpleData name="FINAL.UNIT.TYPE">organic C</SimpleData>
							<SimpleData name="CONVERSION.FACTOR.from.Rowe.1983">*1</SimpleData>
							<SimpleData name="FINAL.BIOMASS..mg.C.per.m2">145.7215419</SimpleData>
							<SimpleData name="REFERENCE">Danovaro et al 2008</SimpleData>
							<SimpleData name="PROVIDER">Roberto Danovaro</SimpleData>
							<SimpleData name="BODY.OF.WATER">Ionian Sea</SimpleData>
							<SimpleData name="REGION">E Mediterranean</SimpleData>
							<SimpleData name="OCEAN.SEA">Mediterranean</SimpleData>
							<SimpleData name="HABITAT">Continental Slope</SimpleData>
							<SimpleData name="COMMENTS"></SimpleData>
						</SchemaData>
					</ExtendedData>
					<Point>
						<coordinates>20.14666667,35.70633333,0</coordinates>
					</Point>
				</Placemark>
				<Placemark>
					<styleUrl>#m_ylw-pushpin</styleUrl>
					<ExtendedData>
						<SchemaData schemaUrl="#data">
							<SimpleData name="CATEGORY">bacteria</SimpleData>
							<SimpleData name="STATION"></SimpleData>
							<SimpleData name="REPLICATION"></SimpleData>
							<SimpleData name="DEPTH.m">2950</SimpleData>
							<SimpleData name="DATE.UTC"></SimpleData>
							<SimpleData name="GEAR">Box Core</SimpleData>
							<SimpleData name="GEAR2">Core</SimpleData>
							<SimpleData name="SEDIMENT.DEPTH.cm">10</SimpleData>
							<SimpleData name="AREA.m2"></SimpleData>
							<SimpleData name="ABUNDANCE.per.m2">5226600000000</SimpleData>
							<SimpleData name="DATA.TYPE.ABUNDANCE">Raw</SimpleData>
							<SimpleData name="CARBON.WT.mg.C.per.m2">205.6403084</SimpleData>
							<SimpleData name="FINAL.UNIT.TYPE">organic C</SimpleData>
							<SimpleData name="CONVERSION.FACTOR.from.Rowe.1983">*1</SimpleData>
							<SimpleData name="FINAL.BIOMASS..mg.C.per.m2">205.6403084</SimpleData>
							<SimpleData name="REFERENCE">Danovaro et al 2008</SimpleData>
							<SimpleData name="PROVIDER">Roberto Danovaro</SimpleData>
							<SimpleData name="BODY.OF.WATER">Ionian Sea</SimpleData>
							<SimpleData name="REGION">E Mediterranean</SimpleData>
							<SimpleData name="OCEAN.SEA">Mediterranean</SimpleData>
							<SimpleData name="HABITAT">Continental Slope</SimpleData>
							<SimpleData name="COMMENTS"></SimpleData>
						</SchemaData>
					</ExtendedData>
					<Point>
						<coordinates>22.53283333,34.88183333,0</coordinates>
					</Point>
				</Placemark>
				<Placemark>
					<styleUrl>#m_ylw-pushpin</styleUrl>
					<ExtendedData>
						<SchemaData schemaUrl="#data">
							<SimpleData name="CATEGORY">bacteria</SimpleData>
							<SimpleData name="STATION"></SimpleData>
							<SimpleData name="REPLICATION"></SimpleData>
							<SimpleData name="DEPTH.m">2950</SimpleData>
							<SimpleData name="DATE.UTC"></SimpleData>
							<SimpleData name="GEAR">Box Core</SimpleData>
							<SimpleData name="GEAR2">Core</SimpleData>
							<SimpleData name="SEDIMENT.DEPTH.cm">10</SimpleData>
							<SimpleData name="AREA.m2"></SimpleData>
							<SimpleData name="ABUNDANCE.per.m2">5611410000000</SimpleData>
							<SimpleData name="DATA.TYPE.ABUNDANCE">Raw</SimpleData>
							<SimpleData name="CARBON.WT.mg.C.per.m2">219.7203084</SimpleData>
							<SimpleData name="FINAL.UNIT.TYPE">organic C</SimpleData>
							<SimpleData name="CONVERSION.FACTOR.from.Rowe.1983">*1</SimpleData>
							<SimpleData name="FINAL.BIOMASS..mg.C.per.m2">219.7203084</SimpleData>
							<SimpleData name="REFERENCE">Danovaro et al 2008</SimpleData>
							<SimpleData name="PROVIDER">Roberto Danovaro</SimpleData>
							<SimpleData name="BODY.OF.WATER">Ionian Sea</SimpleData>
							<SimpleData name="REGION">E Mediterranean</SimpleData>
							<SimpleData name="OCEAN.SEA">Mediterranean</SimpleData>
							<SimpleData name="HABITAT">Continental Slope</SimpleData>
							<SimpleData name="COMMENTS"></SimpleData>
						</SchemaData>
					</ExtendedData>
					<Point>
						<coordinates>22.53283333,34.88183333,0</coordinates>
					</Point>
				</Placemark>
				<Placemark>
					<styleUrl>#m_ylw-pushpin</styleUrl>
					<ExtendedData>
						<SchemaData schemaUrl="#data">
							<SimpleData name="CATEGORY">bacteria</SimpleData>
							<SimpleData name="STATION"></SimpleData>
							<SimpleData name="REPLICATION"></SimpleData>
							<SimpleData name="DEPTH.m">2950</SimpleData>
							<SimpleData name="DATE.UTC"></SimpleData>
							<SimpleData name="GEAR">Box Core</SimpleData>
							<SimpleData name="GEAR2">Core</SimpleData>
							<SimpleData name="SEDIMENT.DEPTH.cm">10</SimpleData>
							<SimpleData name="AREA.m2"></SimpleData>
							<SimpleData name="ABUNDANCE.per.m2">4841790000000</SimpleData>
							<SimpleData name="DATA.TYPE.ABUNDANCE">Raw</SimpleData>
							<SimpleData name="CARBON.WT.mg.C.per.m2">191.5603084</SimpleData>
							<SimpleData name="FINAL.UNIT.TYPE">organic C</SimpleData>
							<SimpleData name="CONVERSION.FACTOR.from.Rowe.1983">*1</SimpleData>
							<SimpleData name="FINAL.BIOMASS..mg.C.per.m2">191.5603084</SimpleData>
							<SimpleData name="REFERENCE">Danovaro et al 2008</SimpleData>
							<SimpleData name="PROVIDER">Roberto Danovaro</SimpleData>
							<SimpleData name="BODY.OF.WATER">Ionian Sea</SimpleData>
							<SimpleData name="REGION">E Mediterranean</SimpleData>
							<SimpleData name="OCEAN.SEA">Mediterranean</SimpleData>
							<SimpleData name="HABITAT">Continental Slope</SimpleData>
							<SimpleData name="COMMENTS"></SimpleData>
						</SchemaData>
					</ExtendedData>
					<Point>
						<coordinates>22.53283333,34.88183333,0</coordinates>
					</Point>
				</Placemark>
				<Placemark>
					<styleUrl>#m_ylw-pushpin</styleUrl>
					<ExtendedData>
						<SchemaData schemaUrl="#data">
							<SimpleData name="CATEGORY">bacteria</SimpleData>
							<SimpleData name="STATION"></SimpleData>
							<SimpleData name="REPLICATION"></SimpleData>
							<SimpleData name="DEPTH.m">3055</SimpleData>
							<SimpleData name="DATE.UTC"></SimpleData>
							<SimpleData name="GEAR">Box Core</SimpleData>
							<SimpleData name="GEAR2">Core</SimpleData>
							<SimpleData name="SEDIMENT.DEPTH.cm">10</SimpleData>
							<SimpleData name="AREA.m2"></SimpleData>
							<SimpleData name="ABUNDANCE.per.m2">2216570000000</SimpleData>
							<SimpleData name="DATA.TYPE.ABUNDANCE">Raw</SimpleData>
							<SimpleData name="CARBON.WT.mg.C.per.m2">144.7046977</SimpleData>
							<SimpleData name="FINAL.UNIT.TYPE">organic C</SimpleData>
							<SimpleData name="CONVERSION.FACTOR.from.Rowe.1983">*1</SimpleData>
							<SimpleData name="FINAL.BIOMASS..mg.C.per.m2">144.7046977</SimpleData>
							<SimpleData name="REFERENCE">Danovaro et al 2008</SimpleData>
							<SimpleData name="PROVIDER">Roberto Danovaro</SimpleData>
							<SimpleData name="BODY.OF.WATER">E Mediterranean</SimpleData>
							<SimpleData name="REGION">E Mediterranean</SimpleData>
							<SimpleData name="OCEAN.SEA">Mediterranean</SimpleData>
							<SimpleData name="HABITAT">Continental Slope</SimpleData>
							<SimpleData name="COMMENTS"></SimpleData>
						</SchemaData>
					</ExtendedData>
					<Point>
						<coordinates>28.31733333,33.38633333,0</coordinates>
					</Point>
				</Placemark>
				<Placemark>
					<styleUrl>#m_ylw-pushpin</styleUrl>
					<ExtendedData>
						<SchemaData schemaUrl="#data">
							<SimpleData name="CATEGORY">bacteria</SimpleData>
							<SimpleData name="STATION"></SimpleData>
							<SimpleData name="REPLICATION"></SimpleData>
							<SimpleData name="DEPTH.m">3055</SimpleData>
							<SimpleData name="DATE.UTC"></SimpleData>
							<SimpleData name="GEAR">Box Core</SimpleData>
							<SimpleData name="GEAR2">Core</SimpleData>
							<SimpleData name="SEDIMENT.DEPTH.cm">10</SimpleData>
							<SimpleData name="AREA.m2"></SimpleData>
							<SimpleData name="ABUNDANCE.per.m2">3104420000000</SimpleData>
							<SimpleData name="DATA.TYPE.ABUNDANCE">Raw</SimpleData>
							<SimpleData name="CARBON.WT.mg.C.per.m2">156.7046977</SimpleData>
							<SimpleData name="FINAL.UNIT.TYPE">organic C</SimpleData>
							<SimpleData name="CONVERSION.FACTOR.from.Rowe.1983">*1</SimpleData>
							<SimpleData name="FINAL.BIOMASS..mg.C.per.m2">156.7046977</SimpleData>
							<SimpleData name="REFERENCE">Danovaro et al 2008</SimpleData>
							<SimpleData name="PROVIDER">Roberto Danovaro</SimpleData>
							<SimpleData name="BODY.OF.WATER">E Mediterranean</SimpleData>
							<SimpleData name="REGION">E Mediterranean</SimpleData>
							<SimpleData name="OCEAN.SEA">Mediterranean</SimpleData>
							<SimpleData name="HABITAT">Continental Slope</SimpleData>
							<SimpleData name="COMMENTS"></SimpleData>
						</SchemaData>
					</ExtendedData>
					<Point>
						<coordinates>28.31733333,33.38633333,0</coordinates>
					</Point>
				</Placemark>
				<Placemark>
					<styleUrl>#m_ylw-pushpin</styleUrl>
					<ExtendedData>
						<SchemaData schemaUrl="#data">
							<SimpleData name="CATEGORY">bacteria</SimpleData>
							<SimpleData name="STATION"></SimpleData>
							<SimpleData name="REPLICATION"></SimpleData>
							<SimpleData name="DEPTH.m">3055</SimpleData>
							<SimpleData name="DATE.UTC"></SimpleData>
							<SimpleData name="GEAR">Box Core</SimpleData>
							<SimpleData name="GEAR2">Core</SimpleData>
							<SimpleData name="SEDIMENT.DEPTH.cm">10</SimpleData>
							<SimpleData name="AREA.m2"></SimpleData>
							<SimpleData name="ABUNDANCE.per.m2">1328720000000</SimpleData>
							<SimpleData name="DATA.TYPE.ABUNDANCE">Raw</SimpleData>
							<SimpleData name="CARBON.WT.mg.C.per.m2">132.7046977</SimpleData>
							<SimpleData name="FINAL.UNIT.TYPE">organic C</SimpleData>
							<SimpleData name="CONVERSION.FACTOR.from.Rowe.1983">*1</SimpleData>
							<SimpleData name="FINAL.BIOMASS..mg.C.per.m2">132.7046977</SimpleData>
							<SimpleData name="REFERENCE">Danovaro et al 2008</SimpleData>
							<SimpleData name="PROVIDER">Roberto Danovaro</SimpleData>
							<SimpleData name="BODY.OF.WATER">E Mediterranean</SimpleData>
							<SimpleData name="REGION">E Mediterranean</SimpleData>
							<SimpleData name="OCEAN.SEA">Mediterranean</SimpleData>
							<SimpleData name="HABITAT">Continental Slope</SimpleData>
							<SimpleData name="COMMENTS"></SimpleData>
						</SchemaData>
					</ExtendedData>
					<Point>
						<coordinates>28.31733333,33.38633333,0</coordinates>
					</Point>
				</Placemark>
				<Placemark>
					<styleUrl>#m_ylw-pushpin</styleUrl>
					<ExtendedData>
						<SchemaData schemaUrl="#data">
							<SimpleData name="CATEGORY">bacteria</SimpleData>
							<SimpleData name="STATION"></SimpleData>
							<SimpleData name="REPLICATION"></SimpleData>
							<SimpleData name="DEPTH.m">2100</SimpleData>
							<SimpleData name="DATE.UTC"></SimpleData>
							<SimpleData name="GEAR">Box Core</SimpleData>
							<SimpleData name="GEAR2">Core</SimpleData>
							<SimpleData name="SEDIMENT.DEPTH.cm">10</SimpleData>
							<SimpleData name="AREA.m2"></SimpleData>
							<SimpleData name="ABUNDANCE.per.m2">3360000000000</SimpleData>
							<SimpleData name="DATA.TYPE.ABUNDANCE">Raw</SimpleData>
							<SimpleData name="CARBON.WT.mg.C.per.m2">221.44</SimpleData>
							<SimpleData name="FINAL.UNIT.TYPE">organic C</SimpleData>
							<SimpleData name="CONVERSION.FACTOR.from.Rowe.1983">*1</SimpleData>
							<SimpleData name="FINAL.BIOMASS..mg.C.per.m2">221.44</SimpleData>
							<SimpleData name="REFERENCE">Danovaro et al 2008</SimpleData>
							<SimpleData name="PROVIDER">Roberto Danovaro</SimpleData>
							<SimpleData name="BODY.OF.WATER">E Mediterranean</SimpleData>
							<SimpleData name="REGION">E Mediterranean</SimpleData>
							<SimpleData name="OCEAN.SEA">Mediterranean</SimpleData>
							<SimpleData name="HABITAT">Continental Slope</SimpleData>
							<SimpleData name="COMMENTS"></SimpleData>
						</SchemaData>
					</ExtendedData>
					<Point>
						<coordinates>33.30716667,33.65566667,0</coordinates>
					</Point>
				</Placemark>
				<Placemark>
					<styleUrl>#m_ylw-pushpin</styleUrl>
					<ExtendedData>
						<SchemaData schemaUrl="#data">
							<SimpleData name="CATEGORY">bacteria</SimpleData>
							<SimpleData name="STATION"></SimpleData>
							<SimpleData name="REPLICATION"></SimpleData>
							<SimpleData name="DEPTH.m">2100</SimpleData>
							<SimpleData name="DATE.UTC"></SimpleData>
							<SimpleData name="GEAR">Box Core</SimpleData>
							<SimpleData name="GEAR2">Core</SimpleData>
							<SimpleData name="SEDIMENT.DEPTH.cm">10</SimpleData>
							<SimpleData name="AREA.m2"></SimpleData>
							<SimpleData name="ABUNDANCE.per.m2">3929440000000</SimpleData>
							<SimpleData name="DATA.TYPE.ABUNDANCE">Raw</SimpleData>
							<SimpleData name="CARBON.WT.mg.C.per.m2">242.4</SimpleData>
							<SimpleData name="FINAL.UNIT.TYPE">organic C</SimpleData>
							<SimpleData name="CONVERSION.FACTOR.from.Rowe.1983">*1</SimpleData>
							<SimpleData name="FINAL.BIOMASS..mg.C.per.m2">242.4</SimpleData>
							<SimpleData name="REFERENCE">Danovaro et al 2008</SimpleData>
							<SimpleData name="PROVIDER">Roberto Danovaro</SimpleData>
							<SimpleData name="BODY.OF.WATER">E Mediterranean</SimpleData>
							<SimpleData name="REGION">E Mediterranean</SimpleData>
							<SimpleData name="OCEAN.SEA">Mediterranean</SimpleData>
							<SimpleData name="HABITAT">Continental Slope</SimpleData>
							<SimpleData name="COMMENTS"></SimpleData>
						</SchemaData>
					</ExtendedData>
					<Point>
						<coordinates>33.30716667,33.65566667,0</coordinates>
					</Point>
				</Placemark>
				<Placemark>
					<styleUrl>#m_ylw-pushpin</styleUrl>
					<ExtendedData>
						<SchemaData schemaUrl="#data">
							<SimpleData name="CATEGORY">bacteria</SimpleData>
							<SimpleData name="STATION"></SimpleData>
							<SimpleData name="REPLICATION"></SimpleData>
							<SimpleData name="DEPTH.m">2100</SimpleData>
							<SimpleData name="DATE.UTC"></SimpleData>
							<SimpleData name="GEAR">Box Core</SimpleData>
							<SimpleData name="GEAR2">Core</SimpleData>
							<SimpleData name="SEDIMENT.DEPTH.cm">10</SimpleData>
							<SimpleData name="AREA.m2"></SimpleData>
							<SimpleData name="ABUNDANCE.per.m2">2790560000000</SimpleData>
							<SimpleData name="DATA.TYPE.ABUNDANCE">Raw</SimpleData>
							<SimpleData name="CARBON.WT.mg.C.per.m2">200.48</SimpleData>
							<SimpleData name="FINAL.UNIT.TYPE">organic C</SimpleData>
							<SimpleData name="CONVERSION.FACTOR.from.Rowe.1983">*1</SimpleData>
							<SimpleData name="FINAL.BIOMASS..mg.C.per.m2">200.48</SimpleData>
							<SimpleData name="REFERENCE">Danovaro et al 2008</SimpleData>
							<SimpleData name="PROVIDER">Roberto Danovaro</SimpleData>
							<SimpleData name="BODY.OF.WATER">E Mediterranean</SimpleData>
							<SimpleData name="REGION">E Mediterranean</SimpleData>
							<SimpleData name="OCEAN.SEA">Mediterranean</SimpleData>
							<SimpleData name="HABITAT">Continental Slope</SimpleData>
							<SimpleData name="COMMENTS"></SimpleData>
						</SchemaData>
					</ExtendedData>
					<Point>
						<coordinates>33.30716667,33.65566667,0</coordinates>
					</Point>
				</Placemark>
				<Placemark>
					<styleUrl>#m_ylw-pushpin</styleUrl>
					<ExtendedData>
						<SchemaData schemaUrl="#data">
							<SimpleData name="CATEGORY">bacteria</SimpleData>
							<SimpleData name="STATION"></SimpleData>
							<SimpleData name="REPLICATION"></SimpleData>
							<SimpleData name="DEPTH.m">3870</SimpleData>
							<SimpleData name="DATE.UTC"></SimpleData>
							<SimpleData name="GEAR">Box Core</SimpleData>
							<SimpleData name="GEAR2">Core</SimpleData>
							<SimpleData name="SEDIMENT.DEPTH.cm">10</SimpleData>
							<SimpleData name="AREA.m2"></SimpleData>
							<SimpleData name="ABUNDANCE.per.m2">2802220000000</SimpleData>
							<SimpleData name="DATA.TYPE.ABUNDANCE">Raw</SimpleData>
							<SimpleData name="CARBON.WT.mg.C.per.m2">162.4295069</SimpleData>
							<SimpleData name="FINAL.UNIT.TYPE">organic C</SimpleData>
							<SimpleData name="CONVERSION.FACTOR.from.Rowe.1983">*1</SimpleData>
							<SimpleData name="FINAL.BIOMASS..mg.C.per.m2">162.4295069</SimpleData>
							<SimpleData name="REFERENCE">Danovaro et al 2008</SimpleData>
							<SimpleData name="PROVIDER">Roberto Danovaro</SimpleData>
							<SimpleData name="BODY.OF.WATER">E Mediterranean</SimpleData>
							<SimpleData name="REGION">E Mediterranean</SimpleData>
							<SimpleData name="OCEAN.SEA">Mediterranean</SimpleData>
							<SimpleData name="HABITAT">Continental Slope</SimpleData>
							<SimpleData name="COMMENTS"></SimpleData>
						</SchemaData>
					</ExtendedData>
					<Point>
						<coordinates>28.71916667,35.7715,0</coordinates>
					</Point>
				</Placemark>
				<Placemark>
					<styleUrl>#m_ylw-pushpin</styleUrl>
					<ExtendedData>
						<SchemaData schemaUrl="#data">
							<SimpleData name="CATEGORY">bacteria</SimpleData>
							<SimpleData name="STATION"></SimpleData>
							<SimpleData name="REPLICATION"></SimpleData>
							<SimpleData name="DEPTH.m">3870</SimpleData>
							<SimpleData name="DATE.UTC"></SimpleData>
							<SimpleData name="GEAR">Box Core</SimpleData>
							<SimpleData name="GEAR2">Core</SimpleData>
							<SimpleData name="SEDIMENT.DEPTH.cm">10</SimpleData>
							<SimpleData name="AREA.m2"></SimpleData>
							<SimpleData name="ABUNDANCE.per.m2">3003060000000</SimpleData>
							<SimpleData name="DATA.TYPE.ABUNDANCE">Raw</SimpleData>
							<SimpleData name="CARBON.WT.mg.C.per.m2">182.8295069</SimpleData>
							<SimpleData name="FINAL.UNIT.TYPE">organic C</SimpleData>
							<SimpleData name="CONVERSION.FACTOR.from.Rowe.1983">*1</SimpleData>
							<SimpleData name="FINAL.BIOMASS..mg.C.per.m2">182.8295069</SimpleData>
							<SimpleData name="REFERENCE">Danovaro et al 2008</SimpleData>
							<SimpleData name="PROVIDER">Roberto Danovaro</SimpleData>
							<SimpleData name="BODY.OF.WATER">E Mediterranean</SimpleData>
							<SimpleData name="REGION">E Mediterranean</SimpleData>
							<SimpleData name="OCEAN.SEA">Mediterranean</SimpleData>
							<SimpleData name="HABITAT">Continental Slope</SimpleData>
							<SimpleData name="COMMENTS"></SimpleData>
						</SchemaData>
					</ExtendedData>
					<Point>
						<coordinates>28.71916667,35.7715,0</coordinates>
					</Point>
				</Placemark>
				<Placemark>
					<styleUrl>#m_ylw-pushpin</styleUrl>
					<ExtendedData>
						<SchemaData schemaUrl="#data">
							<SimpleData name="CATEGORY">bacteria</SimpleData>
							<SimpleData name="STATION"></SimpleData>
							<SimpleData name="REPLICATION"></SimpleData>
							<SimpleData name="DEPTH.m">3870</SimpleData>
							<SimpleData name="DATE.UTC"></SimpleData>
							<SimpleData name="GEAR">Box Core</SimpleData>
							<SimpleData name="GEAR2">Core</SimpleData>
							<SimpleData name="SEDIMENT.DEPTH.cm">10</SimpleData>
							<SimpleData name="AREA.m2"></SimpleData>
							<SimpleData name="ABUNDANCE.per.m2">2601390000000</SimpleData>
							<SimpleData name="DATA.TYPE.ABUNDANCE">Raw</SimpleData>
							<SimpleData name="CARBON.WT.mg.C.per.m2">142.0295069</SimpleData>
							<SimpleData name="FINAL.UNIT.TYPE">organic C</SimpleData>
							<SimpleData name="CONVERSION.FACTOR.from.Rowe.1983">*1</SimpleData>
							<SimpleData name="FINAL.BIOMASS..mg.C.per.m2">142.0295069</SimpleData>
							<SimpleData name="REFERENCE">Danovaro et al 2008</SimpleData>
							<SimpleData name="PROVIDER">Roberto Danovaro</SimpleData>
							<SimpleData name="BODY.OF.WATER">E Mediterranean</SimpleData>
							<SimpleData name="REGION">E Mediterranean</SimpleData>
							<SimpleData name="OCEAN.SEA">Mediterranean</SimpleData>
							<SimpleData name="HABITAT">Continental Slope</SimpleData>
							<SimpleData name="COMMENTS"></SimpleData>
						</SchemaData>
					</ExtendedData>
					<Point>
						<coordinates>28.71916667,35.7715,0</coordinates>
					</Point>
				</Placemark>
				<Placemark>
					<styleUrl>#m_ylw-pushpin</styleUrl>
					<ExtendedData>
						<SchemaData schemaUrl="#data">
							<SimpleData name="CATEGORY">bacteria</SimpleData>
							<SimpleData name="STATION"></SimpleData>
							<SimpleData name="REPLICATION"></SimpleData>
							<SimpleData name="DEPTH.m">434</SimpleData>
							<SimpleData name="DATE.UTC"></SimpleData>
							<SimpleData name="GEAR">Box Core</SimpleData>
							<SimpleData name="GEAR2">Core</SimpleData>
							<SimpleData name="SEDIMENT.DEPTH.cm">10</SimpleData>
							<SimpleData name="AREA.m2"></SimpleData>
							<SimpleData name="ABUNDANCE.per.m2">4194110000000</SimpleData>
							<SimpleData name="DATA.TYPE.ABUNDANCE">Raw</SimpleData>
							<SimpleData name="CARBON.WT.mg.C.per.m2">107.8061217</SimpleData>
							<SimpleData name="FINAL.UNIT.TYPE">organic C</SimpleData>
							<SimpleData name="CONVERSION.FACTOR.from.Rowe.1983">*1</SimpleData>
							<SimpleData name="FINAL.BIOMASS..mg.C.per.m2">107.8061217</SimpleData>
							<SimpleData name="REFERENCE">Danovaro et al 2008</SimpleData>
							<SimpleData name="PROVIDER">Roberto Danovaro</SimpleData>
							<SimpleData name="BODY.OF.WATER">W Mediterranean</SimpleData>
							<SimpleData name="REGION">W Mediterranean</SimpleData>
							<SimpleData name="OCEAN.SEA">Mediterranean</SimpleData>
							<SimpleData name="HABITAT">Continental Slope</SimpleData>
							<SimpleData name="COMMENTS"></SimpleData>
						</SchemaData>
					</ExtendedData>
					<Point>
						<coordinates>3.400666667,42.574,0</coordinates>
					</Point>
				</Placemark>
				<Placemark>
					<styleUrl>#m_ylw-pushpin</styleUrl>
					<ExtendedData>
						<SchemaData schemaUrl="#data">
							<SimpleData name="CATEGORY">bacteria</SimpleData>
							<SimpleData name="STATION"></SimpleData>
							<SimpleData name="REPLICATION"></SimpleData>
							<SimpleData name="DEPTH.m">434</SimpleData>
							<SimpleData name="DATE.UTC"></SimpleData>
							<SimpleData name="GEAR">Box Core</SimpleData>
							<SimpleData name="GEAR2">Core</SimpleData>
							<SimpleData name="SEDIMENT.DEPTH.cm">10</SimpleData>
							<SimpleData name="AREA.m2"></SimpleData>
							<SimpleData name="ABUNDANCE.per.m2">5163990000000</SimpleData>
							<SimpleData name="DATA.TYPE.ABUNDANCE">Raw</SimpleData>
							<SimpleData name="CARBON.WT.mg.C.per.m2">146.5227364</SimpleData>
							<SimpleData name="FINAL.UNIT.TYPE">organic C</SimpleData>
							<SimpleData name="CONVERSION.FACTOR.from.Rowe.1983">*1</SimpleData>
							<SimpleData name="FINAL.BIOMASS..mg.C.per.m2">146.5227364</SimpleData>
							<SimpleData name="REFERENCE">Danovaro et al 2008</SimpleData>
							<SimpleData name="PROVIDER">Roberto Danovaro</SimpleData>
							<SimpleData name="BODY.OF.WATER">W Mediterranean</SimpleData>
							<SimpleData name="REGION">W Mediterranean</SimpleData>
							<SimpleData name="OCEAN.SEA">Mediterranean</SimpleData>
							<SimpleData name="HABITAT">Continental Slope</SimpleData>
							<SimpleData name="COMMENTS"></SimpleData>
						</SchemaData>
					</ExtendedData>
					<Point>
						<coordinates>3.400666667,42.574,0</coordinates>
					</Point>
				</Placemark>
				<Placemark>
					<styleUrl>#m_ylw-pushpin</styleUrl>
					<ExtendedData>
						<SchemaData schemaUrl="#data">
							<SimpleData name="CATEGORY">bacteria</SimpleData>
							<SimpleData name="STATION"></SimpleData>
							<SimpleData name="REPLICATION"></SimpleData>
							<SimpleData name="DEPTH.m">434</SimpleData>
							<SimpleData name="DATE.UTC"></SimpleData>
							<SimpleData name="GEAR">Box Core</SimpleData>
							<SimpleData name="GEAR2">Core</SimpleData>
							<SimpleData name="SEDIMENT.DEPTH.cm">10</SimpleData>
							<SimpleData name="AREA.m2"></SimpleData>
							<SimpleData name="ABUNDANCE.per.m2">3224230000000</SimpleData>
							<SimpleData name="DATA.TYPE.ABUNDANCE">Raw</SimpleData>
							<SimpleData name="CARBON.WT.mg.C.per.m2">69.08950701</SimpleData>
							<SimpleData name="FINAL.UNIT.TYPE">organic C</SimpleData>
							<SimpleData name="CONVERSION.FACTOR.from.Rowe.1983">*1</SimpleData>
							<SimpleData name="FINAL.BIOMASS..mg.C.per.m2">69.08950701</SimpleData>
							<SimpleData name="REFERENCE">Danovaro et al 2008</SimpleData>
							<SimpleData name="PROVIDER">Roberto Danovaro</SimpleData>
							<SimpleData name="BODY.OF.WATER">W Mediterranean</SimpleData>
							<SimpleData name="REGION">W Mediterranean</SimpleData>
							<SimpleData name="OCEAN.SEA">Mediterranean</SimpleData>
							<SimpleData name="HABITAT">Continental Slope</SimpleData>
							<SimpleData name="COMMENTS"></SimpleData>
						</SchemaData>
					</ExtendedData>
					<Point>
						<coordinates>3.400666667,42.574,0</coordinates>
					</Point>
				</Placemark>
				<Placemark>
					<styleUrl>#m_ylw-pushpin</styleUrl>
					<ExtendedData>
						<SchemaData schemaUrl="#data">
							<SimpleData name="CATEGORY">bacteria</SimpleData>
							<SimpleData name="STATION"></SimpleData>
							<SimpleData name="REPLICATION"></SimpleData>
							<SimpleData name="DEPTH.m">990</SimpleData>
							<SimpleData name="DATE.UTC"></SimpleData>
							<SimpleData name="GEAR">Box Core</SimpleData>
							<SimpleData name="GEAR2">Core</SimpleData>
							<SimpleData name="SEDIMENT.DEPTH.cm">10</SimpleData>
							<SimpleData name="AREA.m2"></SimpleData>
							<SimpleData name="ABUNDANCE.per.m2">6448940000000</SimpleData>
							<SimpleData name="DATA.TYPE.ABUNDANCE">Raw</SimpleData>
							<SimpleData name="CARBON.WT.mg.C.per.m2">140.3955809</SimpleData>
							<SimpleData name="FINAL.UNIT.TYPE">organic C</SimpleData>
							<SimpleData name="CONVERSION.FACTOR.from.Rowe.1983">*1</SimpleData>
							<SimpleData name="FINAL.BIOMASS..mg.C.per.m2">140.3955809</SimpleData>
							<SimpleData name="REFERENCE">Danovaro et al 2008</SimpleData>
							<SimpleData name="PROVIDER">Roberto Danovaro</SimpleData>
							<SimpleData name="BODY.OF.WATER">W Mediterranean</SimpleData>
							<SimpleData name="REGION">W Mediterranean</SimpleData>
							<SimpleData name="OCEAN.SEA">Mediterranean</SimpleData>
							<SimpleData name="HABITAT">Continental Slope</SimpleData>
							<SimpleData name="COMMENTS"></SimpleData>
						</SchemaData>
					</ExtendedData>
					<Point>
						<coordinates>3.5305,42.44266667,0</coordinates>
					</Point>
				</Placemark>
				<Placemark>
					<styleUrl>#m_ylw-pushpin</styleUrl>
					<ExtendedData>
						<SchemaData schemaUrl="#data">
							<SimpleData name="CATEGORY">bacteria</SimpleData>
							<SimpleData name="STATION"></SimpleData>
							<SimpleData name="REPLICATION"></SimpleData>
							<SimpleData name="DEPTH.m">990</SimpleData>
							<SimpleData name="DATE.UTC"></SimpleData>
							<SimpleData name="GEAR">Box Core</SimpleData>
							<SimpleData name="GEAR2">Core</SimpleData>
							<SimpleData name="SEDIMENT.DEPTH.cm">10</SimpleData>
							<SimpleData name="AREA.m2"></SimpleData>
							<SimpleData name="ABUNDANCE.per.m2">7431840000000</SimpleData>
							<SimpleData name="DATA.TYPE.ABUNDANCE">Raw</SimpleData>
							<SimpleData name="CARBON.WT.mg.C.per.m2">178.6334814</SimpleData>
							<SimpleData name="FINAL.UNIT.TYPE">organic C</SimpleData>
							<SimpleData name="CONVERSION.FACTOR.from.Rowe.1983">*1</SimpleData>
							<SimpleData name="FINAL.BIOMASS..mg.C.per.m2">178.6334814</SimpleData>
							<SimpleData name="REFERENCE">Danovaro et al 2008</SimpleData>
							<SimpleData name="PROVIDER">Roberto Danovaro</SimpleData>
							<SimpleData name="BODY.OF.WATER">W Mediterranean</SimpleData>
							<SimpleData name="REGION">W Mediterranean</SimpleData>
							<SimpleData name="OCEAN.SEA">Mediterranean</SimpleData>
							<SimpleData name="HABITAT">Continental Slope</SimpleData>
							<SimpleData name="COMMENTS"></SimpleData>
						</SchemaData>
					</ExtendedData>
					<Point>
						<coordinates>3.5305,42.44266667,0</coordinates>
					</Point>
				</Placemark>
				<Placemark>
					<styleUrl>#m_ylw-pushpin</styleUrl>
					<ExtendedData>
						<SchemaData schemaUrl="#data">
							<SimpleData name="CATEGORY">bacteria</SimpleData>
							<SimpleData name="STATION"></SimpleData>
							<SimpleData name="REPLICATION"></SimpleData>
							<SimpleData name="DEPTH.m">990</SimpleData>
							<SimpleData name="DATE.UTC"></SimpleData>
							<SimpleData name="GEAR">Box Core</SimpleData>
							<SimpleData name="GEAR2">Core</SimpleData>
							<SimpleData name="SEDIMENT.DEPTH.cm">10</SimpleData>
							<SimpleData name="AREA.m2"></SimpleData>
							<SimpleData name="ABUNDANCE.per.m2">5466030000000</SimpleData>
							<SimpleData name="DATA.TYPE.ABUNDANCE">Raw</SimpleData>
							<SimpleData name="CARBON.WT.mg.C.per.m2">102.1576803</SimpleData>
							<SimpleData name="FINAL.UNIT.TYPE">organic C</SimpleData>
							<SimpleData name="CONVERSION.FACTOR.from.Rowe.1983">*1</SimpleData>
							<SimpleData name="FINAL.BIOMASS..mg.C.per.m2">102.1576803</SimpleData>
							<SimpleData name="REFERENCE">Danovaro et al 2008</SimpleData>
							<SimpleData name="PROVIDER">Roberto Danovaro</SimpleData>
							<SimpleData name="BODY.OF.WATER">W Mediterranean</SimpleData>
							<SimpleData name="REGION">W Mediterranean</SimpleData>
							<SimpleData name="OCEAN.SEA">Mediterranean</SimpleData>
							<SimpleData name="HABITAT">Continental Slope</SimpleData>
							<SimpleData name="COMMENTS"></SimpleData>
						</SchemaData>
					</ExtendedData>
					<Point>
						<coordinates>3.5305,42.44266667,0</coordinates>
					</Point>
				</Placemark>
				<Placemark>
					<styleUrl>#m_ylw-pushpin</styleUrl>
					<ExtendedData>
						<SchemaData schemaUrl="#data">
							<SimpleData name="CATEGORY">bacteria</SimpleData>
							<SimpleData name="STATION"></SimpleData>
							<SimpleData name="REPLICATION"></SimpleData>
							<SimpleData name="DEPTH.m">1497</SimpleData>
							<SimpleData name="DATE.UTC"></SimpleData>
							<SimpleData name="GEAR">Box Core</SimpleData>
							<SimpleData name="GEAR2">Core</SimpleData>
							<SimpleData name="SEDIMENT.DEPTH.cm">10</SimpleData>
							<SimpleData name="AREA.m2"></SimpleData>
							<SimpleData name="ABUNDANCE.per.m2">1706220000000</SimpleData>
							<SimpleData name="DATA.TYPE.ABUNDANCE">Raw</SimpleData>
							<SimpleData name="CARBON.WT.mg.C.per.m2">42.24427877</SimpleData>
							<SimpleData name="FINAL.UNIT.TYPE">organic C</SimpleData>
							<SimpleData name="CONVERSION.FACTOR.from.Rowe.1983">*1</SimpleData>
							<SimpleData name="FINAL.BIOMASS..mg.C.per.m2">42.24427877</SimpleData>
							<SimpleData name="REFERENCE">Danovaro et al 2008</SimpleData>
							<SimpleData name="PROVIDER">Roberto Danovaro</SimpleData>
							<SimpleData name="BODY.OF.WATER">W Mediterranean</SimpleData>
							<SimpleData name="REGION">W Mediterranean</SimpleData>
							<SimpleData name="OCEAN.SEA">Mediterranean</SimpleData>
							<SimpleData name="HABITAT">Continental Slope</SimpleData>
							<SimpleData name="COMMENTS"></SimpleData>
						</SchemaData>
					</ExtendedData>
					<Point>
						<coordinates>3.8235,42.366,0</coordinates>
					</Point>
				</Placemark>
				<Placemark>
					<styleUrl>#m_ylw-pushpin</styleUrl>
					<ExtendedData>
						<SchemaData schemaUrl="#data">
							<SimpleData name="CATEGORY">bacteria</SimpleData>
							<SimpleData name="STATION"></SimpleData>
							<SimpleData name="REPLICATION"></SimpleData>
							<SimpleData name="DEPTH.m">1497</SimpleData>
							<SimpleData name="DATE.UTC"></SimpleData>
							<SimpleData name="GEAR">Box Core</SimpleData>
							<SimpleData name="GEAR2">Core</SimpleData>
							<SimpleData name="SEDIMENT.DEPTH.cm">10</SimpleData>
							<SimpleData name="AREA.m2"></SimpleData>
							<SimpleData name="ABUNDANCE.per.m2">2566060000000</SimpleData>
							<SimpleData name="DATA.TYPE.ABUNDANCE">Raw</SimpleData>
							<SimpleData name="CARBON.WT.mg.C.per.m2">85.75556782</SimpleData>
							<SimpleData name="FINAL.UNIT.TYPE">organic C</SimpleData>
							<SimpleData name="CONVERSION.FACTOR.from.Rowe.1983">*1</SimpleData>
							<SimpleData name="FINAL.BIOMASS..mg.C.per.m2">85.75556782</SimpleData>
							<SimpleData name="REFERENCE">Danovaro et al 2008</SimpleData>
							<SimpleData name="PROVIDER">Roberto Danovaro</SimpleData>
							<SimpleData name="BODY.OF.WATER">W Mediterranean</SimpleData>
							<SimpleData name="REGION">W Mediterranean</SimpleData>
							<SimpleData name="OCEAN.SEA">Mediterranean</SimpleData>
							<SimpleData name="HABITAT">Continental Slope</SimpleData>
							<SimpleData name="COMMENTS"></SimpleData>
						</SchemaData>
					</ExtendedData>
					<Point>
						<coordinates>3.8235,42.366,0</coordinates>
					</Point>
				</Placemark>
				<Placemark>
					<styleUrl>#m_ylw-pushpin</styleUrl>
					<ExtendedData>
						<SchemaData schemaUrl="#data">
							<SimpleData name="CATEGORY">bacteria</SimpleData>
							<SimpleData name="STATION"></SimpleData>
							<SimpleData name="REPLICATION"></SimpleData>
							<SimpleData name="DEPTH.m">2320</SimpleData>
							<SimpleData name="DATE.UTC"></SimpleData>
							<SimpleData name="GEAR">Box Core</SimpleData>
							<SimpleData name="GEAR2">Core</SimpleData>
							<SimpleData name="SEDIMENT.DEPTH.cm">10</SimpleData>
							<SimpleData name="AREA.m2"></SimpleData>
							<SimpleData name="ABUNDANCE.per.m2">1638490000000</SimpleData>
							<SimpleData name="DATA.TYPE.ABUNDANCE">Raw</SimpleData>
							<SimpleData name="CARBON.WT.mg.C.per.m2">38.51410324</SimpleData>
							<SimpleData name="FINAL.UNIT.TYPE">organic C</SimpleData>
							<SimpleData name="CONVERSION.FACTOR.from.Rowe.1983">*1</SimpleData>
							<SimpleData name="FINAL.BIOMASS..mg.C.per.m2">38.51410324</SimpleData>
							<SimpleData name="REFERENCE">Danovaro et al 2008</SimpleData>
							<SimpleData name="PROVIDER">Roberto Danovaro</SimpleData>
							<SimpleData name="BODY.OF.WATER">W Mediterranean</SimpleData>
							<SimpleData name="REGION">W Mediterranean</SimpleData>
							<SimpleData name="OCEAN.SEA">Mediterranean</SimpleData>
							<SimpleData name="HABITAT">Continental Slope</SimpleData>
							<SimpleData name="COMMENTS"></SimpleData>
						</SchemaData>
					</ExtendedData>
					<Point>
						<coordinates>4.681666667,42.07966667,0</coordinates>
					</Point>
				</Placemark>
				<Placemark>
					<styleUrl>#m_ylw-pushpin</styleUrl>
					<ExtendedData>
						<SchemaData schemaUrl="#data">
							<SimpleData name="CATEGORY">bacteria</SimpleData>
							<SimpleData name="STATION"></SimpleData>
							<SimpleData name="REPLICATION"></SimpleData>
							<SimpleData name="DEPTH.m">2320</SimpleData>
							<SimpleData name="DATE.UTC"></SimpleData>
							<SimpleData name="GEAR">Box Core</SimpleData>
							<SimpleData name="GEAR2">Core</SimpleData>
							<SimpleData name="SEDIMENT.DEPTH.cm">10</SimpleData>
							<SimpleData name="AREA.m2"></SimpleData>
							<SimpleData name="ABUNDANCE.per.m2">2158590000000</SimpleData>
							<SimpleData name="DATA.TYPE.ABUNDANCE">Raw</SimpleData>
							<SimpleData name="CARBON.WT.mg.C.per.m2">58.53793521</SimpleData>
							<SimpleData name="FINAL.UNIT.TYPE">organic C</SimpleData>
							<SimpleData name="CONVERSION.FACTOR.from.Rowe.1983">*1</SimpleData>
							<SimpleData name="FINAL.BIOMASS..mg.C.per.m2">58.53793521</SimpleData>
							<SimpleData name="REFERENCE">Danovaro et al 2008</SimpleData>
							<SimpleData name="PROVIDER">Roberto Danovaro</SimpleData>
							<SimpleData name="BODY.OF.WATER">W Mediterranean</SimpleData>
							<SimpleData name="REGION">W Mediterranean</SimpleData>
							<SimpleData name="OCEAN.SEA">Mediterranean</SimpleData>
							<SimpleData name="HABITAT">Continental Slope</SimpleData>
							<SimpleData name="COMMENTS"></SimpleData>
						</SchemaData>
					</ExtendedData>
					<Point>
						<coordinates>4.681666667,42.07966667,0</coordinates>
					</Point>
				</Placemark>
				<Placemark>
					<styleUrl>#m_ylw-pushpin</styleUrl>
					<ExtendedData>
						<SchemaData schemaUrl="#data">
							<SimpleData name="CATEGORY">bacteria</SimpleData>
							<SimpleData name="STATION"></SimpleData>
							<SimpleData name="REPLICATION"></SimpleData>
							<SimpleData name="DEPTH.m">2320</SimpleData>
							<SimpleData name="DATE.UTC"></SimpleData>
							<SimpleData name="GEAR">Box Core</SimpleData>
							<SimpleData name="GEAR2">Core</SimpleData>
							<SimpleData name="SEDIMENT.DEPTH.cm">10</SimpleData>
							<SimpleData name="AREA.m2"></SimpleData>
							<SimpleData name="ABUNDANCE.per.m2">1118390000000</SimpleData>
							<SimpleData name="DATA.TYPE.ABUNDANCE">Raw</SimpleData>
							<SimpleData name="CARBON.WT.mg.C.per.m2">18.49027127</SimpleData>
							<SimpleData name="FINAL.UNIT.TYPE">organic C</SimpleData>
							<SimpleData name="CONVERSION.FACTOR.from.Rowe.1983">*1</SimpleData>
							<SimpleData name="FINAL.BIOMASS..mg.C.per.m2">18.49027127</SimpleData>
							<SimpleData name="REFERENCE">Danovaro et al 2008</SimpleData>
							<SimpleData name="PROVIDER">Roberto Danovaro</SimpleData>
							<SimpleData name="BODY.OF.WATER">W Mediterranean</SimpleData>
							<SimpleData name="REGION">W Mediterranean</SimpleData>
							<SimpleData name="OCEAN.SEA">Mediterranean</SimpleData>
							<SimpleData name="HABITAT">Continental Slope</SimpleData>
							<SimpleData name="COMMENTS"></SimpleData>
						</SchemaData>
					</ExtendedData>
					<Point>
						<coordinates>4.681666667,42.07966667,0</coordinates>
					</Point>
				</Placemark>
				<Placemark>
					<styleUrl>#m_ylw-pushpin</styleUrl>
					<ExtendedData>
						<SchemaData schemaUrl="#data">
							<SimpleData name="CATEGORY">bacteria</SimpleData>
							<SimpleData name="STATION"></SimpleData>
							<SimpleData name="REPLICATION"></SimpleData>
							<SimpleData name="DEPTH.m">398</SimpleData>
							<SimpleData name="DATE.UTC"></SimpleData>
							<SimpleData name="GEAR">Box Core</SimpleData>
							<SimpleData name="GEAR2">Core</SimpleData>
							<SimpleData name="SEDIMENT.DEPTH.cm">10</SimpleData>
							<SimpleData name="AREA.m2"></SimpleData>
							<SimpleData name="ABUNDANCE.per.m2">5466200000000</SimpleData>
							<SimpleData name="DATA.TYPE.ABUNDANCE">Raw</SimpleData>
							<SimpleData name="CARBON.WT.mg.C.per.m2">155.1424597</SimpleData>
							<SimpleData name="FINAL.UNIT.TYPE">organic C</SimpleData>
							<SimpleData name="CONVERSION.FACTOR.from.Rowe.1983">*1</SimpleData>
							<SimpleData name="FINAL.BIOMASS..mg.C.per.m2">155.1424597</SimpleData>
							<SimpleData name="REFERENCE">Danovaro et al 2008</SimpleData>
							<SimpleData name="PROVIDER">Roberto Danovaro</SimpleData>
							<SimpleData name="BODY.OF.WATER">W Mediterranean</SimpleData>
							<SimpleData name="REGION">W Mediterranean</SimpleData>
							<SimpleData name="OCEAN.SEA">Mediterranean</SimpleData>
							<SimpleData name="HABITAT">Continental Slope</SimpleData>
							<SimpleData name="COMMENTS"></SimpleData>
						</SchemaData>
					</ExtendedData>
					<Point>
						<coordinates>3.584333333,42.1475,0</coordinates>
					</Point>
				</Placemark>
				<Placemark>
					<styleUrl>#m_ylw-pushpin</styleUrl>
					<ExtendedData>
						<SchemaData schemaUrl="#data">
							<SimpleData name="CATEGORY">bacteria</SimpleData>
							<SimpleData name="STATION"></SimpleData>
							<SimpleData name="REPLICATION"></SimpleData>
							<SimpleData name="DEPTH.m">398</SimpleData>
							<SimpleData name="DATE.UTC"></SimpleData>
							<SimpleData name="GEAR">Box Core</SimpleData>
							<SimpleData name="GEAR2">Core</SimpleData>
							<SimpleData name="SEDIMENT.DEPTH.cm">10</SimpleData>
							<SimpleData name="AREA.m2"></SimpleData>
							<SimpleData name="ABUNDANCE.per.m2">6480840000000</SimpleData>
							<SimpleData name="DATA.TYPE.ABUNDANCE">Raw</SimpleData>
							<SimpleData name="CARBON.WT.mg.C.per.m2">208.6593777</SimpleData>
							<SimpleData name="FINAL.UNIT.TYPE">organic C</SimpleData>
							<SimpleData name="CONVERSION.FACTOR.from.Rowe.1983">*1</SimpleData>
							<SimpleData name="FINAL.BIOMASS..mg.C.per.m2">208.6593777</SimpleData>
							<SimpleData name="REFERENCE">Danovaro et al 2008</SimpleData>
							<SimpleData name="PROVIDER">Roberto Danovaro</SimpleData>
							<SimpleData name="BODY.OF.WATER">W Mediterranean</SimpleData>
							<SimpleData name="REGION">W Mediterranean</SimpleData>
							<SimpleData name="OCEAN.SEA">Mediterranean</SimpleData>
							<SimpleData name="HABITAT">Continental Slope</SimpleData>
							<SimpleData name="COMMENTS"></SimpleData>
						</SchemaData>
					</ExtendedData>
					<Point>
						<coordinates>3.584333333,42.1475,0</coordinates>
					</Point>
				</Placemark>
				<Placemark>
					<styleUrl>#m_ylw-pushpin</styleUrl>
					<ExtendedData>
						<SchemaData schemaUrl="#data">
							<SimpleData name="CATEGORY">bacteria</SimpleData>
							<SimpleData name="STATION"></SimpleData>
							<SimpleData name="REPLICATION"></SimpleData>
							<SimpleData name="DEPTH.m">398</SimpleData>
							<SimpleData name="DATE.UTC"></SimpleData>
							<SimpleData name="GEAR">Box Core</SimpleData>
							<SimpleData name="GEAR2">Core</SimpleData>
							<SimpleData name="SEDIMENT.DEPTH.cm">10</SimpleData>
							<SimpleData name="AREA.m2"></SimpleData>
							<SimpleData name="ABUNDANCE.per.m2">4451550000000</SimpleData>
							<SimpleData name="DATA.TYPE.ABUNDANCE">Raw</SimpleData>
							<SimpleData name="CARBON.WT.mg.C.per.m2">101.6255417</SimpleData>
							<SimpleData name="FINAL.UNIT.TYPE">organic C</SimpleData>
							<SimpleData name="CONVERSION.FACTOR.from.Rowe.1983">*1</SimpleData>
							<SimpleData name="FINAL.BIOMASS..mg.C.per.m2">101.6255417</SimpleData>
							<SimpleData name="REFERENCE">Danovaro et al 2008</SimpleData>
							<SimpleData name="PROVIDER">Roberto Danovaro</SimpleData>
							<SimpleData name="BODY.OF.WATER">W Mediterranean</SimpleData>
							<SimpleData name="REGION">W Mediterranean</SimpleData>
							<SimpleData name="OCEAN.SEA">Mediterranean</SimpleData>
							<SimpleData name="HABITAT">Continental Slope</SimpleData>
							<SimpleData name="COMMENTS"></SimpleData>
						</SchemaData>
					</ExtendedData>
					<Point>
						<coordinates>3.584333333,42.1475,0</coordinates>
					</Point>
				</Placemark>
				<Placemark>
					<styleUrl>#m_ylw-pushpin</styleUrl>
					<ExtendedData>
						<SchemaData schemaUrl="#data">
							<SimpleData name="CATEGORY">bacteria</SimpleData>
							<SimpleData name="STATION"></SimpleData>
							<SimpleData name="REPLICATION"></SimpleData>
							<SimpleData name="DEPTH.m">985</SimpleData>
							<SimpleData name="DATE.UTC"></SimpleData>
							<SimpleData name="GEAR">Box Core</SimpleData>
							<SimpleData name="GEAR2">Core</SimpleData>
							<SimpleData name="SEDIMENT.DEPTH.cm">10</SimpleData>
							<SimpleData name="AREA.m2"></SimpleData>
							<SimpleData name="ABUNDANCE.per.m2">4661350000000</SimpleData>
							<SimpleData name="DATA.TYPE.ABUNDANCE">Raw</SimpleData>
							<SimpleData name="CARBON.WT.mg.C.per.m2">113.5444529</SimpleData>
							<SimpleData name="FINAL.UNIT.TYPE">organic C</SimpleData>
							<SimpleData name="CONVERSION.FACTOR.from.Rowe.1983">*1</SimpleData>
							<SimpleData name="FINAL.BIOMASS..mg.C.per.m2">113.5444529</SimpleData>
							<SimpleData name="REFERENCE">Danovaro et al 2008</SimpleData>
							<SimpleData name="PROVIDER">Roberto Danovaro</SimpleData>
							<SimpleData name="BODY.OF.WATER">W Mediterranean</SimpleData>
							<SimpleData name="REGION">W Mediterranean</SimpleData>
							<SimpleData name="OCEAN.SEA">Mediterranean</SimpleData>
							<SimpleData name="HABITAT">Continental Slope</SimpleData>
							<SimpleData name="COMMENTS"></SimpleData>
						</SchemaData>
					</ExtendedData>
					<Point>
						<coordinates>3.777166667,42.12866667,0</coordinates>
					</Point>
				</Placemark>
				<Placemark>
					<styleUrl>#m_ylw-pushpin</styleUrl>
					<ExtendedData>
						<SchemaData schemaUrl="#data">
							<SimpleData name="CATEGORY">bacteria</SimpleData>
							<SimpleData name="STATION"></SimpleData>
							<SimpleData name="REPLICATION"></SimpleData>
							<SimpleData name="DEPTH.m">985</SimpleData>
							<SimpleData name="DATE.UTC"></SimpleData>
							<SimpleData name="GEAR">Box Core</SimpleData>
							<SimpleData name="GEAR2">Core</SimpleData>
							<SimpleData name="SEDIMENT.DEPTH.cm">10</SimpleData>
							<SimpleData name="AREA.m2"></SimpleData>
							<SimpleData name="ABUNDANCE.per.m2">5334010000000</SimpleData>
							<SimpleData name="DATA.TYPE.ABUNDANCE">Raw</SimpleData>
							<SimpleData name="CARBON.WT.mg.C.per.m2">140.4382865</SimpleData>
							<SimpleData name="FINAL.UNIT.TYPE">organic C</SimpleData>
							<SimpleData name="CONVERSION.FACTOR.from.Rowe.1983">*1</SimpleData>
							<SimpleData name="FINAL.BIOMASS..mg.C.per.m2">140.4382865</SimpleData>
							<SimpleData name="REFERENCE">Danovaro et al 2008</SimpleData>
							<SimpleData name="PROVIDER">Roberto Danovaro</SimpleData>
							<SimpleData name="BODY.OF.WATER">W Mediterranean</SimpleData>
							<SimpleData name="REGION">W Mediterranean</SimpleData>
							<SimpleData name="OCEAN.SEA">Mediterranean</SimpleData>
							<SimpleData name="HABITAT">Continental Slope</SimpleData>
							<SimpleData name="COMMENTS"></SimpleData>
						</SchemaData>
					</ExtendedData>
					<Point>
						<coordinates>3.777166667,42.12866667,0</coordinates>
					</Point>
				</Placemark>
				<Placemark>
					<styleUrl>#m_ylw-pushpin</styleUrl>
					<ExtendedData>
						<SchemaData schemaUrl="#data">
							<SimpleData name="CATEGORY">bacteria</SimpleData>
							<SimpleData name="STATION"></SimpleData>
							<SimpleData name="REPLICATION"></SimpleData>
							<SimpleData name="DEPTH.m">985</SimpleData>
							<SimpleData name="DATE.UTC"></SimpleData>
							<SimpleData name="GEAR">Box Core</SimpleData>
							<SimpleData name="GEAR2">Core</SimpleData>
							<SimpleData name="SEDIMENT.DEPTH.cm">10</SimpleData>
							<SimpleData name="AREA.m2"></SimpleData>
							<SimpleData name="ABUNDANCE.per.m2">3988680000000</SimpleData>
							<SimpleData name="DATA.TYPE.ABUNDANCE">Raw</SimpleData>
							<SimpleData name="CARBON.WT.mg.C.per.m2">86.65061929</SimpleData>
							<SimpleData name="FINAL.UNIT.TYPE">organic C</SimpleData>
							<SimpleData name="CONVERSION.FACTOR.from.Rowe.1983">*1</SimpleData>
							<SimpleData name="FINAL.BIOMASS..mg.C.per.m2">86.65061929</SimpleData>
							<SimpleData name="REFERENCE">Danovaro et al 2008</SimpleData>
							<SimpleData name="PROVIDER">Roberto Danovaro</SimpleData>
							<SimpleData name="BODY.OF.WATER">W Mediterranean</SimpleData>
							<SimpleData name="REGION">W Mediterranean</SimpleData>
							<SimpleData name="OCEAN.SEA">Mediterranean</SimpleData>
							<SimpleData name="HABITAT">Continental Slope</SimpleData>
							<SimpleData name="COMMENTS"></SimpleData>
						</SchemaData>
					</ExtendedData>
					<Point>
						<coordinates>3.777166667,42.12866667,0</coordinates>
					</Point>
				</Placemark>
				<Placemark>
					<styleUrl>#m_ylw-pushpin</styleUrl>
					<ExtendedData>
						<SchemaData schemaUrl="#data">
							<SimpleData name="CATEGORY">bacteria</SimpleData>
							<SimpleData name="STATION"></SimpleData>
							<SimpleData name="REPLICATION"></SimpleData>
							<SimpleData name="DEPTH.m">1887</SimpleData>
							<SimpleData name="DATE.UTC"></SimpleData>
							<SimpleData name="GEAR">Box Core</SimpleData>
							<SimpleData name="GEAR2">Core</SimpleData>
							<SimpleData name="SEDIMENT.DEPTH.cm">10</SimpleData>
							<SimpleData name="AREA.m2"></SimpleData>
							<SimpleData name="ABUNDANCE.per.m2">5572570000000</SimpleData>
							<SimpleData name="DATA.TYPE.ABUNDANCE">Raw</SimpleData>
							<SimpleData name="CARBON.WT.mg.C.per.m2">143.6872895</SimpleData>
							<SimpleData name="FINAL.UNIT.TYPE">organic C</SimpleData>
							<SimpleData name="CONVERSION.FACTOR.from.Rowe.1983">*1</SimpleData>
							<SimpleData name="FINAL.BIOMASS..mg.C.per.m2">143.6872895</SimpleData>
							<SimpleData name="REFERENCE">Danovaro et al 2008</SimpleData>
							<SimpleData name="PROVIDER">Roberto Danovaro</SimpleData>
							<SimpleData name="BODY.OF.WATER">W Mediterranean</SimpleData>
							<SimpleData name="REGION">W Mediterranean</SimpleData>
							<SimpleData name="OCEAN.SEA">Mediterranean</SimpleData>
							<SimpleData name="HABITAT">Continental Slope</SimpleData>
							<SimpleData name="COMMENTS"></SimpleData>
						</SchemaData>
					</ExtendedData>
					<Point>
						<coordinates>4.045666667,42.1175,0</coordinates>
					</Point>
				</Placemark>
				<Placemark>
					<styleUrl>#m_ylw-pushpin</styleUrl>
					<ExtendedData>
						<SchemaData schemaUrl="#data">
							<SimpleData name="CATEGORY">bacteria</SimpleData>
							<SimpleData name="STATION"></SimpleData>
							<SimpleData name="REPLICATION"></SimpleData>
							<SimpleData name="DEPTH.m">1887</SimpleData>
							<SimpleData name="DATE.UTC"></SimpleData>
							<SimpleData name="GEAR">Box Core</SimpleData>
							<SimpleData name="GEAR2">Core</SimpleData>
							<SimpleData name="SEDIMENT.DEPTH.cm">10</SimpleData>
							<SimpleData name="AREA.m2"></SimpleData>
							<SimpleData name="ABUNDANCE.per.m2">6166000000000</SimpleData>
							<SimpleData name="DATA.TYPE.ABUNDANCE">Raw</SimpleData>
							<SimpleData name="CARBON.WT.mg.C.per.m2">171.4136229</SimpleData>
							<SimpleData name="FINAL.UNIT.TYPE">organic C</SimpleData>
							<SimpleData name="CONVERSION.FACTOR.from.Rowe.1983">*1</SimpleData>
							<SimpleData name="FINAL.BIOMASS..mg.C.per.m2">171.4136229</SimpleData>
							<SimpleData name="REFERENCE">Danovaro et al 2008</SimpleData>
							<SimpleData name="PROVIDER">Roberto Danovaro</SimpleData>
							<SimpleData name="BODY.OF.WATER">W Mediterranean</SimpleData>
							<SimpleData name="REGION">W Mediterranean</SimpleData>
							<SimpleData name="OCEAN.SEA">Mediterranean</SimpleData>
							<SimpleData name="HABITAT">Continental Slope</SimpleData>
							<SimpleData name="COMMENTS"></SimpleData>
						</SchemaData>
					</ExtendedData>
					<Point>
						<coordinates>4.045666667,42.1175,0</coordinates>
					</Point>
				</Placemark>
				<Placemark>
					<styleUrl>#m_ylw-pushpin</styleUrl>
					<ExtendedData>
						<SchemaData schemaUrl="#data">
							<SimpleData name="CATEGORY">bacteria</SimpleData>
							<SimpleData name="STATION"></SimpleData>
							<SimpleData name="REPLICATION"></SimpleData>
							<SimpleData name="DEPTH.m">1887</SimpleData>
							<SimpleData name="DATE.UTC"></SimpleData>
							<SimpleData name="GEAR">Box Core</SimpleData>
							<SimpleData name="GEAR2">Core</SimpleData>
							<SimpleData name="SEDIMENT.DEPTH.cm">10</SimpleData>
							<SimpleData name="AREA.m2"></SimpleData>
							<SimpleData name="ABUNDANCE.per.m2">4979140000000</SimpleData>
							<SimpleData name="DATA.TYPE.ABUNDANCE">Raw</SimpleData>
							<SimpleData name="CARBON.WT.mg.C.per.m2">115.960956</SimpleData>
							<SimpleData name="FINAL.UNIT.TYPE">organic C</SimpleData>
							<SimpleData name="CONVERSION.FACTOR.from.Rowe.1983">*1</SimpleData>
							<SimpleData name="FINAL.BIOMASS..mg.C.per.m2">115.960956</SimpleData>
							<SimpleData name="REFERENCE">Danovaro et al 2008</SimpleData>
							<SimpleData name="PROVIDER">Roberto Danovaro</SimpleData>
							<SimpleData name="BODY.OF.WATER">W Mediterranean</SimpleData>
							<SimpleData name="REGION">W Mediterranean</SimpleData>
							<SimpleData name="OCEAN.SEA">Mediterranean</SimpleData>
							<SimpleData name="HABITAT">Continental Slope</SimpleData>
							<SimpleData name="COMMENTS"></SimpleData>
						</SchemaData>
					</ExtendedData>
					<Point>
						<coordinates>4.045666667,42.1175,0</coordinates>
					</Point>
				</Placemark>
				<Placemark>
					<styleUrl>#m_ylw-pushpin</styleUrl>
					<ExtendedData>
						<SchemaData schemaUrl="#data">
							<SimpleData name="CATEGORY">bacteria</SimpleData>
							<SimpleData name="STATION"></SimpleData>
							<SimpleData name="REPLICATION"></SimpleData>
							<SimpleData name="DEPTH.m">3588</SimpleData>
							<SimpleData name="DATE.UTC"></SimpleData>
							<SimpleData name="GEAR">Box Core</SimpleData>
							<SimpleData name="GEAR2">Core</SimpleData>
							<SimpleData name="SEDIMENT.DEPTH.cm">10</SimpleData>
							<SimpleData name="AREA.m2"></SimpleData>
							<SimpleData name="ABUNDANCE.per.m2">2085290000000</SimpleData>
							<SimpleData name="DATA.TYPE.ABUNDANCE">Raw</SimpleData>
							<SimpleData name="CARBON.WT.mg.C.per.m2">38.63732924</SimpleData>
							<SimpleData name="FINAL.UNIT.TYPE">organic C</SimpleData>
							<SimpleData name="CONVERSION.FACTOR.from.Rowe.1983">*1</SimpleData>
							<SimpleData name="FINAL.BIOMASS..mg.C.per.m2">38.63732924</SimpleData>
							<SimpleData name="REFERENCE">Danovaro et al 2008</SimpleData>
							<SimpleData name="PROVIDER">Roberto Danovaro</SimpleData>
							<SimpleData name="BODY.OF.WATER">Tyrrhenian Sea</SimpleData>
							<SimpleData name="REGION">W Mediterranean</SimpleData>
							<SimpleData name="OCEAN.SEA">Mediterranean</SimpleData>
							<SimpleData name="HABITAT">Continental Slope</SimpleData>
							<SimpleData name="COMMENTS"></SimpleData>
						</SchemaData>
					</ExtendedData>
					<Point>
						<coordinates>12.76783333,39.88033333,0</coordinates>
					</Point>
				</Placemark>
				<Placemark>
					<styleUrl>#m_ylw-pushpin</styleUrl>
					<ExtendedData>
						<SchemaData schemaUrl="#data">
							<SimpleData name="CATEGORY">bacteria</SimpleData>
							<SimpleData name="STATION"></SimpleData>
							<SimpleData name="REPLICATION"></SimpleData>
							<SimpleData name="DEPTH.m">3588</SimpleData>
							<SimpleData name="DATE.UTC"></SimpleData>
							<SimpleData name="GEAR">Box Core</SimpleData>
							<SimpleData name="GEAR2">Core</SimpleData>
							<SimpleData name="SEDIMENT.DEPTH.cm">10</SimpleData>
							<SimpleData name="AREA.m2"></SimpleData>
							<SimpleData name="ABUNDANCE.per.m2">2179130000000</SimpleData>
							<SimpleData name="DATA.TYPE.ABUNDANCE">Raw</SimpleData>
							<SimpleData name="CARBON.WT.mg.C.per.m2">41.82680473</SimpleData>
							<SimpleData name="FINAL.UNIT.TYPE">organic C</SimpleData>
							<SimpleData name="CONVERSION.FACTOR.from.Rowe.1983">*1</SimpleData>
							<SimpleData name="FINAL.BIOMASS..mg.C.per.m2">41.82680473</SimpleData>
							<SimpleData name="REFERENCE">Danovaro et al 2008</SimpleData>
							<SimpleData name="PROVIDER">Roberto Danovaro</SimpleData>
							<SimpleData name="BODY.OF.WATER">Tyrrhenian Sea</SimpleData>
							<SimpleData name="REGION">W Mediterranean</SimpleData>
							<SimpleData name="OCEAN.SEA">Mediterranean</SimpleData>
							<SimpleData name="HABITAT">Continental Slope</SimpleData>
							<SimpleData name="COMMENTS"></SimpleData>
						</SchemaData>
					</ExtendedData>
					<Point>
						<coordinates>12.76783333,39.88033333,0</coordinates>
					</Point>
				</Placemark>
				<Placemark>
					<styleUrl>#m_ylw-pushpin</styleUrl>
					<ExtendedData>
						<SchemaData schemaUrl="#data">
							<SimpleData name="CATEGORY">bacteria</SimpleData>
							<SimpleData name="STATION"></SimpleData>
							<SimpleData name="REPLICATION"></SimpleData>
							<SimpleData name="DEPTH.m">3588</SimpleData>
							<SimpleData name="DATE.UTC"></SimpleData>
							<SimpleData name="GEAR">Box Core</SimpleData>
							<SimpleData name="GEAR2">Core</SimpleData>
							<SimpleData name="SEDIMENT.DEPTH.cm">10</SimpleData>
							<SimpleData name="AREA.m2"></SimpleData>
							<SimpleData name="ABUNDANCE.per.m2">1991460000000</SimpleData>
							<SimpleData name="DATA.TYPE.ABUNDANCE">Raw</SimpleData>
							<SimpleData name="CARBON.WT.mg.C.per.m2">35.44785375</SimpleData>
							<SimpleData name="FINAL.UNIT.TYPE">organic C</SimpleData>
							<SimpleData name="CONVERSION.FACTOR.from.Rowe.1983">*1</SimpleData>
							<SimpleData name="FINAL.BIOMASS..mg.C.per.m2">35.44785375</SimpleData>
							<SimpleData name="REFERENCE">Danovaro et al 2008</SimpleData>
							<SimpleData name="PROVIDER">Roberto Danovaro</SimpleData>
							<SimpleData name="BODY.OF.WATER">Tyrrhenian Sea</SimpleData>
							<SimpleData name="REGION">W Mediterranean</SimpleData>
							<SimpleData name="OCEAN.SEA">Mediterranean</SimpleData>
							<SimpleData name="HABITAT">Continental Slope</SimpleData>
							<SimpleData name="COMMENTS"></SimpleData>
						</SchemaData>
					</ExtendedData>
					<Point>
						<coordinates>12.76783333,39.88033333,0</coordinates>
					</Point>
				</Placemark>
				<Placemark>
					<styleUrl>#m_ylw-pushpin</styleUrl>
					<ExtendedData>
						<SchemaData schemaUrl="#data">
							<SimpleData name="CATEGORY">bacteria</SimpleData>
							<SimpleData name="STATION"></SimpleData>
							<SimpleData name="REPLICATION"></SimpleData>
							<SimpleData name="DEPTH.m">3483</SimpleData>
							<SimpleData name="DATE.UTC"></SimpleData>
							<SimpleData name="GEAR">Box Core</SimpleData>
							<SimpleData name="GEAR2">Core</SimpleData>
							<SimpleData name="SEDIMENT.DEPTH.cm">10</SimpleData>
							<SimpleData name="AREA.m2"></SimpleData>
							<SimpleData name="ABUNDANCE.per.m2">4620730000000</SimpleData>
							<SimpleData name="DATA.TYPE.ABUNDANCE">Raw</SimpleData>
							<SimpleData name="CARBON.WT.mg.C.per.m2">76.3629376</SimpleData>
							<SimpleData name="FINAL.UNIT.TYPE">organic C</SimpleData>
							<SimpleData name="CONVERSION.FACTOR.from.Rowe.1983">*1</SimpleData>
							<SimpleData name="FINAL.BIOMASS..mg.C.per.m2">76.3629376</SimpleData>
							<SimpleData name="REFERENCE">Danovaro et al 2008</SimpleData>
							<SimpleData name="PROVIDER">Roberto Danovaro</SimpleData>
							<SimpleData name="BODY.OF.WATER">Tyrrhenian Sea</SimpleData>
							<SimpleData name="REGION">W Mediterranean</SimpleData>
							<SimpleData name="OCEAN.SEA">Mediterranean</SimpleData>
							<SimpleData name="HABITAT">Continental Slope</SimpleData>
							<SimpleData name="COMMENTS"></SimpleData>
						</SchemaData>
					</ExtendedData>
					<Point>
						<coordinates>13.369,39.542,0</coordinates>
					</Point>
				</Placemark>
				<Placemark>
					<styleUrl>#m_ylw-pushpin</styleUrl>
					<ExtendedData>
						<SchemaData schemaUrl="#data">
							<SimpleData name="CATEGORY">bacteria</SimpleData>
							<SimpleData name="STATION"></SimpleData>
							<SimpleData name="REPLICATION"></SimpleData>
							<SimpleData name="DEPTH.m">3483</SimpleData>
							<SimpleData name="DATE.UTC"></SimpleData>
							<SimpleData name="GEAR">Box Core</SimpleData>
							<SimpleData name="GEAR2">Core</SimpleData>
							<SimpleData name="SEDIMENT.DEPTH.cm">10</SimpleData>
							<SimpleData name="AREA.m2"></SimpleData>
							<SimpleData name="ABUNDANCE.per.m2">5354200000000</SimpleData>
							<SimpleData name="DATA.TYPE.ABUNDANCE">Raw</SimpleData>
							<SimpleData name="CARBON.WT.mg.C.per.m2">80.00250481</SimpleData>
							<SimpleData name="FINAL.UNIT.TYPE">organic C</SimpleData>
							<SimpleData name="CONVERSION.FACTOR.from.Rowe.1983">*1</SimpleData>
							<SimpleData name="FINAL.BIOMASS..mg.C.per.m2">80.00250481</SimpleData>
							<SimpleData name="REFERENCE">Danovaro et al 2008</SimpleData>
							<SimpleData name="PROVIDER">Roberto Danovaro</SimpleData>
							<SimpleData name="BODY.OF.WATER">Tyrrhenian Sea</SimpleData>
							<SimpleData name="REGION">W Mediterranean</SimpleData>
							<SimpleData name="OCEAN.SEA">Mediterranean</SimpleData>
							<SimpleData name="HABITAT">Continental Slope</SimpleData>
							<SimpleData name="COMMENTS"></SimpleData>
						</SchemaData>
					</ExtendedData>
					<Point>
						<coordinates>13.369,39.542,0</coordinates>
					</Point>
				</Placemark>
				<Placemark>
					<styleUrl>#m_ylw-pushpin</styleUrl>
					<ExtendedData>
						<SchemaData schemaUrl="#data">
							<SimpleData name="CATEGORY">bacteria</SimpleData>
							<SimpleData name="STATION"></SimpleData>
							<SimpleData name="REPLICATION"></SimpleData>
							<SimpleData name="DEPTH.m">3483</SimpleData>
							<SimpleData name="DATE.UTC"></SimpleData>
							<SimpleData name="GEAR">Box Core</SimpleData>
							<SimpleData name="GEAR2">Core</SimpleData>
							<SimpleData name="SEDIMENT.DEPTH.cm">10</SimpleData>
							<SimpleData name="AREA.m2"></SimpleData>
							<SimpleData name="ABUNDANCE.per.m2">3887260000000</SimpleData>
							<SimpleData name="DATA.TYPE.ABUNDANCE">Raw</SimpleData>
							<SimpleData name="CARBON.WT.mg.C.per.m2">72.72337039</SimpleData>
							<SimpleData name="FINAL.UNIT.TYPE">organic C</SimpleData>
							<SimpleData name="CONVERSION.FACTOR.from.Rowe.1983">*1</SimpleData>
							<SimpleData name="FINAL.BIOMASS..mg.C.per.m2">72.72337039</SimpleData>
							<SimpleData name="REFERENCE">Danovaro et al 2008</SimpleData>
							<SimpleData name="PROVIDER">Roberto Danovaro</SimpleData>
							<SimpleData name="BODY.OF.WATER">Tyrrhenian Sea</SimpleData>
							<SimpleData name="REGION">W Mediterranean</SimpleData>
							<SimpleData name="OCEAN.SEA">Mediterranean</SimpleData>
							<SimpleData name="HABITAT">Continental Slope</SimpleData>
							<SimpleData name="COMMENTS"></SimpleData>
						</SchemaData>
					</ExtendedData>
					<Point>
						<coordinates>13.369,39.542,0</coordinates>
					</Point>
				</Placemark>
				<Placemark>
					<styleUrl>#m_ylw-pushpin</styleUrl>
					<ExtendedData>
						<SchemaData schemaUrl="#data">
							<SimpleData name="CATEGORY">bacteria</SimpleData>
							<SimpleData name="STATION"></SimpleData>
							<SimpleData name="REPLICATION"></SimpleData>
							<SimpleData name="DEPTH.m">3430</SimpleData>
							<SimpleData name="DATE.UTC"></SimpleData>
							<SimpleData name="GEAR">Box Core</SimpleData>
							<SimpleData name="GEAR2">Core</SimpleData>
							<SimpleData name="SEDIMENT.DEPTH.cm">10</SimpleData>
							<SimpleData name="AREA.m2"></SimpleData>
							<SimpleData name="ABUNDANCE.per.m2">2231340000000</SimpleData>
							<SimpleData name="DATA.TYPE.ABUNDANCE">Raw</SimpleData>
							<SimpleData name="CARBON.WT.mg.C.per.m2">40.72447103</SimpleData>
							<SimpleData name="FINAL.UNIT.TYPE">organic C</SimpleData>
							<SimpleData name="CONVERSION.FACTOR.from.Rowe.1983">*1</SimpleData>
							<SimpleData name="FINAL.BIOMASS..mg.C.per.m2">40.72447103</SimpleData>
							<SimpleData name="REFERENCE">Danovaro et al 2008</SimpleData>
							<SimpleData name="PROVIDER">Roberto Danovaro</SimpleData>
							<SimpleData name="BODY.OF.WATER">Tyrrhenian Sea</SimpleData>
							<SimpleData name="REGION">W Mediterranean</SimpleData>
							<SimpleData name="OCEAN.SEA">Mediterranean</SimpleData>
							<SimpleData name="HABITAT">Continental Slope</SimpleData>
							<SimpleData name="COMMENTS"></SimpleData>
						</SchemaData>
					</ExtendedData>
					<Point>
						<coordinates>14.10716667,39.1245,0</coordinates>
					</Point>
				</Placemark>
				<Placemark>
					<styleUrl>#m_ylw-pushpin</styleUrl>
					<ExtendedData>
						<SchemaData schemaUrl="#data">
							<SimpleData name="CATEGORY">bacteria</SimpleData>
							<SimpleData name="STATION"></SimpleData>
							<SimpleData name="REPLICATION"></SimpleData>
							<SimpleData name="DEPTH.m">3430</SimpleData>
							<SimpleData name="DATE.UTC"></SimpleData>
							<SimpleData name="GEAR">Box Core</SimpleData>
							<SimpleData name="GEAR2">Core</SimpleData>
							<SimpleData name="SEDIMENT.DEPTH.cm">10</SimpleData>
							<SimpleData name="AREA.m2"></SimpleData>
							<SimpleData name="ABUNDANCE.per.m2">2349930000000</SimpleData>
							<SimpleData name="DATA.TYPE.ABUNDANCE">Raw</SimpleData>
							<SimpleData name="CARBON.WT.mg.C.per.m2">44.71804459</SimpleData>
							<SimpleData name="FINAL.UNIT.TYPE">organic C</SimpleData>
							<SimpleData name="CONVERSION.FACTOR.from.Rowe.1983">*1</SimpleData>
							<SimpleData name="FINAL.BIOMASS..mg.C.per.m2">44.71804459</SimpleData>
							<SimpleData name="REFERENCE">Danovaro et al 2008</SimpleData>
							<SimpleData name="PROVIDER">Roberto Danovaro</SimpleData>
							<SimpleData name="BODY.OF.WATER">Tyrrhenian Sea</SimpleData>
							<SimpleData name="REGION">W Mediterranean</SimpleData>
							<SimpleData name="OCEAN.SEA">Mediterranean</SimpleData>
							<SimpleData name="HABITAT">Continental Slope</SimpleData>
							<SimpleData name="COMMENTS"></SimpleData>
						</SchemaData>
					</ExtendedData>
					<Point>
						<coordinates>14.10716667,39.1245,0</coordinates>
					</Point>
				</Placemark>
				<Placemark>
					<styleUrl>#m_ylw-pushpin</styleUrl>
					<ExtendedData>
						<SchemaData schemaUrl="#data">
							<SimpleData name="CATEGORY">bacteria</SimpleData>
							<SimpleData name="STATION"></SimpleData>
							<SimpleData name="REPLICATION"></SimpleData>
							<SimpleData name="DEPTH.m">3430</SimpleData>
							<SimpleData name="DATE.UTC"></SimpleData>
							<SimpleData name="GEAR">Box Core</SimpleData>
							<SimpleData name="GEAR2">Core</SimpleData>
							<SimpleData name="SEDIMENT.DEPTH.cm">10</SimpleData>
							<SimpleData name="AREA.m2"></SimpleData>
							<SimpleData name="ABUNDANCE.per.m2">2112750000000</SimpleData>
							<SimpleData name="DATA.TYPE.ABUNDANCE">Raw</SimpleData>
							<SimpleData name="CARBON.WT.mg.C.per.m2">36.73089747</SimpleData>
							<SimpleData name="FINAL.UNIT.TYPE">organic C</SimpleData>
							<SimpleData name="CONVERSION.FACTOR.from.Rowe.1983">*1</SimpleData>
							<SimpleData name="FINAL.BIOMASS..mg.C.per.m2">36.73089747</SimpleData>
							<SimpleData name="REFERENCE">Danovaro et al 2008</SimpleData>
							<SimpleData name="PROVIDER">Roberto Danovaro</SimpleData>
							<SimpleData name="BODY.OF.WATER">Tyrrhenian Sea</SimpleData>
							<SimpleData name="REGION">W Mediterranean</SimpleData>
							<SimpleData name="OCEAN.SEA">Mediterranean</SimpleData>
							<SimpleData name="HABITAT">Continental Slope</SimpleData>
							<SimpleData name="COMMENTS"></SimpleData>
						</SchemaData>
					</ExtendedData>
					<Point>
						<coordinates>14.10716667,39.1245,0</coordinates>
					</Point>
				</Placemark>
				<Placemark>
					<styleUrl>#m_ylw-pushpin</styleUrl>
					<ExtendedData>
						<SchemaData schemaUrl="#data">
							<SimpleData name="CATEGORY">bacteria</SimpleData>
							<SimpleData name="STATION"></SimpleData>
							<SimpleData name="REPLICATION"></SimpleData>
							<SimpleData name="DEPTH.m">3400</SimpleData>
							<SimpleData name="DATE.UTC"></SimpleData>
							<SimpleData name="GEAR">Box Core</SimpleData>
							<SimpleData name="GEAR2">Core</SimpleData>
							<SimpleData name="SEDIMENT.DEPTH.cm">10</SimpleData>
							<SimpleData name="AREA.m2"></SimpleData>
							<SimpleData name="ABUNDANCE.per.m2">1991780000000</SimpleData>
							<SimpleData name="DATA.TYPE.ABUNDANCE">Raw</SimpleData>
							<SimpleData name="CARBON.WT.mg.C.per.m2">40.28720977</SimpleData>
							<SimpleData name="FINAL.UNIT.TYPE">organic C</SimpleData>
							<SimpleData name="CONVERSION.FACTOR.from.Rowe.1983">*1</SimpleData>
							<SimpleData name="FINAL.BIOMASS..mg.C.per.m2">40.28720977</SimpleData>
							<SimpleData name="REFERENCE">Danovaro et al 2008</SimpleData>
							<SimpleData name="PROVIDER">Roberto Danovaro</SimpleData>
							<SimpleData name="BODY.OF.WATER">Tyrrhenian Sea</SimpleData>
							<SimpleData name="REGION">W Mediterranean</SimpleData>
							<SimpleData name="OCEAN.SEA">Mediterranean</SimpleData>
							<SimpleData name="HABITAT">Continental Slope</SimpleData>
							<SimpleData name="COMMENTS"></SimpleData>
						</SchemaData>
					</ExtendedData>
					<Point>
						<coordinates>13.27483333,38.93166667,0</coordinates>
					</Point>
				</Placemark>
				<Placemark>
					<styleUrl>#m_ylw-pushpin</styleUrl>
					<ExtendedData>
						<SchemaData schemaUrl="#data">
							<SimpleData name="CATEGORY">bacteria</SimpleData>
							<SimpleData name="STATION"></SimpleData>
							<SimpleData name="REPLICATION"></SimpleData>
							<SimpleData name="DEPTH.m">3400</SimpleData>
							<SimpleData name="DATE.UTC"></SimpleData>
							<SimpleData name="GEAR">Box Core</SimpleData>
							<SimpleData name="GEAR2">Core</SimpleData>
							<SimpleData name="SEDIMENT.DEPTH.cm">10</SimpleData>
							<SimpleData name="AREA.m2"></SimpleData>
							<SimpleData name="ABUNDANCE.per.m2">2378210000000</SimpleData>
							<SimpleData name="DATA.TYPE.ABUNDANCE">Raw</SimpleData>
							<SimpleData name="CARBON.WT.mg.C.per.m2">51.77385686</SimpleData>
							<SimpleData name="FINAL.UNIT.TYPE">organic C</SimpleData>
							<SimpleData name="CONVERSION.FACTOR.from.Rowe.1983">*1</SimpleData>
							<SimpleData name="FINAL.BIOMASS..mg.C.per.m2">51.77385686</SimpleData>
							<SimpleData name="REFERENCE">Danovaro et al 2008</SimpleData>
							<SimpleData name="PROVIDER">Roberto Danovaro</SimpleData>
							<SimpleData name="BODY.OF.WATER">Tyrrhenian Sea</SimpleData>
							<SimpleData name="REGION">W Mediterranean</SimpleData>
							<SimpleData name="OCEAN.SEA">Mediterranean</SimpleData>
							<SimpleData name="HABITAT">Continental Slope</SimpleData>
							<SimpleData name="COMMENTS"></SimpleData>
						</SchemaData>
					</ExtendedData>
					<Point>
						<coordinates>13.27483333,38.93166667,0</coordinates>
					</Point>
				</Placemark>
				<Placemark>
					<styleUrl>#m_ylw-pushpin</styleUrl>
					<ExtendedData>
						<SchemaData schemaUrl="#data">
							<SimpleData name="CATEGORY">bacteria</SimpleData>
							<SimpleData name="STATION"></SimpleData>
							<SimpleData name="REPLICATION"></SimpleData>
							<SimpleData name="DEPTH.m">3400</SimpleData>
							<SimpleData name="DATE.UTC"></SimpleData>
							<SimpleData name="GEAR">Box Core</SimpleData>
							<SimpleData name="GEAR2">Core</SimpleData>
							<SimpleData name="SEDIMENT.DEPTH.cm">10</SimpleData>
							<SimpleData name="AREA.m2"></SimpleData>
							<SimpleData name="ABUNDANCE.per.m2">1605340000000</SimpleData>
							<SimpleData name="DATA.TYPE.ABUNDANCE">Raw</SimpleData>
							<SimpleData name="CARBON.WT.mg.C.per.m2">28.80056268</SimpleData>
							<SimpleData name="FINAL.UNIT.TYPE">organic C</SimpleData>
							<SimpleData name="CONVERSION.FACTOR.from.Rowe.1983">*1</SimpleData>
							<SimpleData name="FINAL.BIOMASS..mg.C.per.m2">28.80056268</SimpleData>
							<SimpleData name="REFERENCE">Danovaro et al 2008</SimpleData>
							<SimpleData name="PROVIDER">Roberto Danovaro</SimpleData>
							<SimpleData name="BODY.OF.WATER">Tyrrhenian Sea</SimpleData>
							<SimpleData name="REGION">W Mediterranean</SimpleData>
							<SimpleData name="OCEAN.SEA">Mediterranean</SimpleData>
							<SimpleData name="HABITAT">Continental Slope</SimpleData>
							<SimpleData name="COMMENTS"></SimpleData>
						</SchemaData>
					</ExtendedData>
					<Point>
						<coordinates>13.27483333,38.93166667,0</coordinates>
					</Point>
				</Placemark>
				<Placemark>
					<styleUrl>#m_ylw-pushpin</styleUrl>
					<ExtendedData>
						<SchemaData schemaUrl="#data">
							<SimpleData name="CATEGORY">bacteria</SimpleData>
							<SimpleData name="STATION"></SimpleData>
							<SimpleData name="REPLICATION"></SimpleData>
							<SimpleData name="DEPTH.m">970</SimpleData>
							<SimpleData name="DATE.UTC"></SimpleData>
							<SimpleData name="GEAR">Box Core</SimpleData>
							<SimpleData name="GEAR2">Core</SimpleData>
							<SimpleData name="SEDIMENT.DEPTH.cm">10</SimpleData>
							<SimpleData name="AREA.m2"></SimpleData>
							<SimpleData name="ABUNDANCE.per.m2">6724550000000</SimpleData>
							<SimpleData name="DATA.TYPE.ABUNDANCE">Raw</SimpleData>
							<SimpleData name="CARBON.WT.mg.C.per.m2">154.2436352</SimpleData>
							<SimpleData name="FINAL.UNIT.TYPE">organic C</SimpleData>
							<SimpleData name="CONVERSION.FACTOR.from.Rowe.1983">*1</SimpleData>
							<SimpleData name="FINAL.BIOMASS..mg.C.per.m2">154.2436352</SimpleData>
							<SimpleData name="REFERENCE">Danovaro et al 2008</SimpleData>
							<SimpleData name="PROVIDER">Roberto Danovaro</SimpleData>
							<SimpleData name="BODY.OF.WATER">Tyrrhenian Sea</SimpleData>
							<SimpleData name="REGION">W Mediterranean</SimpleData>
							<SimpleData name="OCEAN.SEA">Mediterranean</SimpleData>
							<SimpleData name="HABITAT">Continental Slope</SimpleData>
							<SimpleData name="COMMENTS"></SimpleData>
						</SchemaData>
					</ExtendedData>
					<Point>
						<coordinates>9.550000000000001,38.61666667,0</coordinates>
					</Point>
				</Placemark>
				<Placemark>
					<styleUrl>#m_ylw-pushpin</styleUrl>
					<ExtendedData>
						<SchemaData schemaUrl="#data">
							<SimpleData name="CATEGORY">bacteria</SimpleData>
							<SimpleData name="STATION"></SimpleData>
							<SimpleData name="REPLICATION"></SimpleData>
							<SimpleData name="DEPTH.m">970</SimpleData>
							<SimpleData name="DATE.UTC"></SimpleData>
							<SimpleData name="GEAR">Box Core</SimpleData>
[truncated: 16,499,760 more chars]
