# Supplementary material for: Global Patterns and Predictions of Seafloor Biomass Using Random Forests
Source: PLoS One. 2010 Dec 30;5(12):e15323. doi: 10.1371/journal.pone.0015323 (PMC3012679; doi:10.1371/journal.pone.0015323)
Supplement: File S3 — Global seafloor abundance predictions. Predicted abundance (individual m-2) is in global 1×1 degree grids. Data fields include latitude, longitude, depth, and abundance of each size class. The abundance data are in logarithm scale (base 10). (CSV) [file pone.0015323.s003.csv]

latitude	longitude	depth	bact.abun.mean	meio.abun.mean	macro.abun.mean	mega.abun.mean	inv.abun.mean	fis.abun.mean
82.5	-14.5	1002.84722222222	12.9888443463131	5.37278605712383	3.04451019536412	-2.06233392734067	-1.14917921433840	-1.96662074656850
82.5	-13.5	1464.13194444444	13.1424477574120	5.35987684865584	2.99645918915787	-1.97044995163847	-0.761634962488296	-1.69326091309688
82.5	-12.5	1763.58333333333	13.2091930212164	5.43424445363464	3.02234289716118	-1.94825988303905	-0.773170614992772	-1.61619846524443
82.5	-11.5	2167.40277777778	13.2583455880174	5.4356029688007	3.06096163656288	-2.0120118434562	-0.83993785362379	-1.61601452740481
82.5	-10.5	2659.40277777778	13.2366668327705	5.51677694244589	3.06237350425334	-1.95206803955062	-1.03464337064003	-1.58770480457796
82.5	-9.5	3006.29861111111	13.2149525719742	5.52137577439541	2.99859925846837	-1.96364291589588	-1.05007706348206	-1.55120861918997
82.5	-8.5	3110.66666666667	13.1942726099331	5.51214141131212	2.96293511349084	-1.97625076125222	-0.809211122997002	-1.63475677868940
82.5	-7.5	3323.78472222222	13.2380835254436	5.44628918106673	2.90116514934346	-1.93278390313153	-0.898818728854571	-2.07757054634749
82.5	-6.5	3795.38888888889	13.2180379409765	5.39115969059759	2.86852796286637	-1.94544492467231	-0.75887192542625	-1.61838311095332
82.5	10.5	1584.6875	13.0996104800546	4.73256474027556	2.52539972186689	-1.9615914968204	-0.996365568926675	-2.69530174867997
82.5	11.5	1557.92361111111	13.1221137741200	5.0330382612436	2.71173643904382	-2.01075833464804	-1.07803720715402	-2.73685040281125
82.5	14.5	1895.43055555556	13.1717505838121	4.69523939351103	2.88594001472958	-1.92628822368109	-1.06991531533180	-2.63312534455077
82.5	15.5	1862.01388888889	13.1488752784419	4.6850089405322	2.87601008132035	-1.93475404917365	-0.94359082504984	-2.48711026410402
82.5	16.5	1864.11111111111	13.1602552244390	4.87808303592513	2.85399308107867	-1.95769265311841	-0.926936425547186	-2.52667252148117
82.5	24.5	3893.21527777778	13.0782510218331	4.95800118743009	2.65913842207897	-1.8972581536319	-0.815039399725638	-1.9608248759432
82.5	25.5	3796.69444444444	13.0681774214373	4.89080935918497	2.66679428765343	-1.90506743465259	-0.830768558178949	-2.02538951779465
82.5	26.5	3726.58333333333	13.0868483044276	4.88612387735340	2.6646587605219	-1.91040948957950	-0.83391300228321	-2.0385460486494
82.5	27.5	3727.40277777778	13.0791495007697	4.87209872593148	2.66436332640698	-1.9322051938565	-0.842768952251208	-2.06653686650317
82.5	28.5	3757.79166666667	13.049715541888	4.93303721066925	2.68094195716466	-1.9194508816037	-0.83325046131605	-2.1185551349311
82.5	29.5	3694.15972222222	13.0594494603600	4.96097240339753	2.68691083333798	-1.91911664840916	-0.76872528387528	-2.0478358702302
82.5	30.5	3525.96527777778	13.0588623552294	4.95346866064308	2.70725097117861	-1.90903569611278	-0.761276350039787	-2.04157142617716
82.5	31.5	3299.90277777778	13.0553419553270	4.94823533539927	2.72384854267461	-1.90309530553337	-0.769955877495426	-2.06302206771784
82.5	32.5	3103.02083333333	13.0835368610687	4.90596291330292	2.73417100775373	-1.91093131688953	-0.747393633972573	-1.97865915099577
82.5	33.5	2985.95833333333	13.0615144841476	4.86413427641762	2.71185555633555	-1.91905234321824	-0.794822810451811	-2.03532059375738
82.5	34.5	2824.01388888889	13.0627943670479	4.8151923023181	2.75921941138938	-1.92051826603257	-0.809947340743086	-2.04366131646594
82.5	35.5	2588.13888888889	13.0553874211141	4.81810336766078	2.76408752791573	-1.93178654555862	-0.81144749249325	-2.07779023005115
82.5	36.5	2428.94444444444	13.0602565628503	4.78980504117642	2.77720977621443	-1.93960231280848	-0.78232268348517	-2.06238377324442
82.5	37.5	2306.04861111111	13.0497278025589	4.54159022073156	2.76182779721411	-1.99335903442601	-0.820688989765924	-2.05564349054793
82.5	38.5	2206.125	13.0706129161549	4.87606156049202	2.77022695674242	-1.98534789820772	-0.942334681187283	-2.81490022520848
82.5	39.5	2133.29861111111	13.1290671088820	4.88223485641273	2.82249485639251	-2.0386933344283	-0.958061050995609	-2.82743395776256
82.5	40.5	2063.42361111111	13.1628980260293	4.91146499693941	2.7975510933517	-2.00357076791655	-0.959683238739591	-2.65292391848661
82.5	41.5	2068.33333333333	13.1600744668796	5.04525547070789	2.92546120979717	-1.99615264237551	-0.812685935921915	-2.40732392874157
82.5	42.5	1982.67361111111	13.1364684644336	5.04150958223452	2.91869826321927	-1.93653237021718	-0.778652927625939	-1.81649370029978
82.5	44.5	1701.48611111111	13.1238610100285	4.88922724127759	2.74334574358800	-1.92189681567046	-0.786667656630222	-1.86437803228645
82.5	61.5	710.354166666667	13.1343820091813	4.92178954147754	2.7826318645419	-1.80691422919703	-0.933867030053844	-2.37579422528336
82.5	62.5	951.201388888889	13.1370687222662	4.94512939438001	2.78192916637355	-1.92767195943595	-0.934238297174991	-2.43341058656218
82.5	80.5	1752.78472222222	13.0538649306646	5.02301171804128	2.77853671388692	-1.87790604651786	-0.972279724522374	-2.50839689223504
82.5	81.5	1658.28472222222	13.1075588030427	4.9518523833349	2.73954868495153	-1.92202791008506	-0.94320127632226	-2.51269554649533
82.5	82.5	1605.80555555556	13.1541216618116	5.00828277449397	2.77199781267529	-1.94826655278135	-0.957916864370747	-2.48424010319217
82.5	83.5	1560.59722222222	13.0816545654626	4.68639862869285	2.76373235174194	-1.93717626914332	-0.819810568936144	-2.03232251908326
82.5	84.5	1541.97222222222	13.0781675196947	4.81812063838172	2.77236240276201	-1.93086601023990	-0.812701603283204	-1.9709406724702
81.5	-11.5	83.75	13.2830415705770	5.68498193472001	3.04293985674136	-1.77204051672104	-0.762911790780018	-1.13851227307007
81.5	-10.5	295.173611111111	13.2664668616627	5.63232139096614	3.07140598744877	-1.72783010711043	-0.769160752055058	-1.41179955441421
81.5	-9.5	766.201388888889	13.2029530903692	5.60091372743795	3.06042361361476	-1.80914611029794	-0.705990453729541	-1.49885213105265
81.5	-8.5	1404.06944444444	13.1695467245665	5.60840178690244	3.09507156273978	-1.83822994918069	-0.656280958234767	-1.46376589802663
81.5	-7.5	2172.32638888889	13.1647963532799	5.53959513375329	3.06824515238377	-1.89596652176273	-0.768774313326833	-1.55059485999189
81.5	-6.5	2757.36805555556	13.1200815513984	5.4332776828515	3.00800760176241	-1.88980987692783	-0.705022435419963	-1.63591116373477
81.5	-5.5	3093.10416666667	13.0812434145531	5.41185104426331	2.89456657632073	-1.90351884521942	-0.629886005565734	-1.82980442011772
81.5	-4.5	3568.89583333333	13.1962665384312	5.34687148589237	2.85863377240080	-1.92776149106068	-0.661025230522804	-1.84353204884249
81.5	-3.5	3619.54166666667	13.1747843114914	5.34439946110603	2.89479450819744	-1.95318707088436	-0.755204789400343	-1.88346450638054
81.5	-2.5	3339.34722222222	13.1869793865396	5.44612003888697	2.92829804012734	-1.90772981190886	-0.754491423919104	-1.67138505248692
81.5	-1.5	2642.00694444444	13.1465965208712	5.52277608145954	2.95052933094254	-1.92836057596161	-0.786164729833683	-1.68257614097308
81.5	-0.5	2380.71527777778	13.1015348631160	5.49956708113497	2.94841768447554	-1.93027913539154	-0.858008556954756	-1.95476303428685
81.5	1.5	1944.61805555556	13.1905049396967	5.49284131432767	2.99212585511935	-1.94316771332611	-0.849284530514723	-1.97197956775753
81.5	2.5	1428.70833333333	13.2526357457907	5.2128010898976	2.89316487202657	-1.97736052765271	-0.854415301957465	-1.76592444640669
81.5	3.5	853.25	13.1699939925002	5.28878194690153	2.91095338566937	-1.95504290699874	-1.00834907768994	-2.29103799386829
81.5	4.5	782.055555555556	13.1694064696517	5.3629434515773	2.90821301102161	-1.88923608632899	-0.949469325755881	-2.10604176699059
81.5	5.5	773.604166666667	13.1460221804405	5.32784222534718	2.9184023173343	-1.91654007105329	-0.994186077697104	-2.11070420737361
81.5	6.5	759.354166666667	13.1630407076060	5.28968807120591	2.78885218199474	-1.96856003828803	-0.989941956563136	-2.25486739486827
81.5	7.5	731.604166666667	13.1606835192924	5.25611299627796	2.77663817340972	-1.89889155858884	-0.97960941940594	-2.17062402432515
81.5	8.5	826.243055555556	13.1026336349851	5.22765271763615	2.78621221811518	-2.00086192505358	-0.9871981741384	-2.27174959451388
81.5	9.5	1038.02083333333	13.1761147218018	5.14066510712834	2.76502460434086	-2.07708911729722	-0.999079112896668	-2.37641299629745
81.5	10.5	1468	13.1090715549140	5.08221204597003	2.71504560308166	-2.03707750514704	-1.01164383070739	-2.48295511030798
81.5	11.5	1638.07638888889	13.1076242664934	5.08269420628314	2.7059964665378	-2.00275433947515	-1.03564886698115	-2.47076112911366
81.5	12.5	1896.9375	13.0830782325756	5.09629649333755	2.71904478392711	-2.05228760089575	-1.04361895120310	-2.62689115365091
81.5	13.5	2093.46527777778	13.0413065923201	5.10561710752578	2.71496736842090	-2.04706568871057	-1.02518320481811	-2.70805918214152
81.5	14.5	2209.86111111111	13.0735917343485	5.17003711298247	2.68104168727413	-2.01410825162487	-0.98763212737704	-2.68547633607476
81.5	15.5	2197.76388888889	13.0780751525078	5.24084084354515	2.72832204196637	-1.99346644045153	-1.01975632444727	-2.65498567317162
81.5	16.5	2162.14583333333	13.1057041098988	5.25098040198965	2.87094642714011	-2.00871447176234	-0.996799355080015	-2.60488745895876
81.5	21.5	1915.99305555556	13.2209676674700	5.59024008186	2.96647768782305	-1.87835321940087	-0.972861046031795	-2.17096478156868
81.5	22.5	1521.70138888889	13.1494908890312	5.59514042957094	3.00368657844174	-1.87011921042096	-0.930788148060015	-2.18580954653855
81.5	23.5	1460.70138888889	13.1418037777866	5.5934121203342	3.0159556562787	-1.86702337562054	-0.86555075388549	-1.89220293849445
81.5	24.5	1577.9375	13.1509704011518	5.54881126177985	3.0170423816543	-1.85943912741879	-0.903291602069158	-2.16627965797595
81.5	25.5	1530.79861111111	13.1479583531493	5.44477684250147	3.01450986010189	-1.8652121125013	-0.87102056446115	-1.83433130765008
81.5	26.5	1530.88888888889	13.1526004838911	5.47084475849565	3.02775395426932	-1.87382614869196	-0.834933284295342	-1.67412254315914
81.5	27.5	1622.70138888889	13.1569578796959	5.44728720197589	3.03400772216381	-1.87892166669940	-0.839650919210747	-1.66477883631614
81.5	28.5	1619.21527777778	13.1344642787903	5.35584590803267	3.01223969561583	-1.91216305369202	-0.83440186267944	-1.74610265023935
81.5	29.5	1421.70138888889	13.1070236061810	5.44119635614203	2.99119106266305	-1.85760514384135	-0.850358463429714	-1.84776260355223
81.5	30.5	1107.01388888889	13.1373353189565	5.44284101490437	3.01357708929761	-1.86786662862868	-0.86120290993418	-2.09718285815900
81.5	31.5	864.6875	13.1432051963683	5.37075524284639	2.99576611101566	-1.93836892650248	-0.877926183426504	-2.09856745480621
81.5	32.5	691.1875	13.1105862380265	5.17751969596787	2.98670570585594	-1.82665281625658	-0.923009370343985	-2.30727660802468
81.5	33.5	558.020833333333	13.0838051602298	4.99609482396155	2.88399227502272	-1.77387102856249	-0.905342331326729	-2.34575573207592
81.5	34.5	510.194444444444	13.0584220956871	4.87941895417915	2.8507878513959	-1.79081281199206	-0.909553924002957	-2.35234572105965
81.5	35.5	507.986111111111	13.0695487415876	4.91381715046927	2.85251814047148	-1.79130281810758	-0.90126846921831	-2.38958728102205
81.5	36.5	444.923611111111	13.1368953102350	4.94511497054593	2.9116103001475	-1.77563075988250	-0.915741266299851	-2.17859251275780
81.5	37.5	358.201388888889	13.1360143444184	4.97738990298087	2.90514862596871	-1.79834568328312	-0.980943476068828	-2.21194284809311
81.5	38.5	348.305555555556	13.1596927251814	5.04139025072643	2.86791742904355	-1.78724148212661	-0.964737160830232	-2.22935234100526
81.5	39.5	432.673611111111	13.1691866673483	5.05368015426329	2.84195881403849	-1.78994540529813	-0.873883885233988	-2.18268590251551
81.5	40.5	466.173611111111	13.1165944038354	5.1709133734157	2.86605305222879	-1.8177832823589	-0.875298865891517	-2.27976340570185
81.5	41.5	451.826388888889	13.1906448967023	5.47502246201865	3.03811131178386	-1.79544634035065	-1.04171605037758	-2.13630406978754
81.5	42.5	408.013888888889	13.2255272458847	5.49784127000702	3.0502887014954	-1.79506276153417	-0.910314503455673	-1.71724043647876
81.5	43.5	328.486111111111	13.1557691117761	5.38370062320166	3.02986307155113	-1.73456517061298	-0.879213547154302	-1.64448590232947
81.5	44.5	215.729166666667	13.1659089808741	5.43385671926911	3.06826075708024	-1.79924275283183	-0.941554231377395	-1.60484493641295
81.5	45.5	148.993055555556	13.1077263121707	5.55694769589633	3.03789437526294	-1.76369552733574	-0.87721825689604	-1.5074724742111
81.5	46.5	122.729166666667	13.1222088155582	5.66341820376599	3.03929157827875	-1.75941823123559	-0.850651596407103	-1.48951889977619
81.5	47.5	114.506944444444	13.1961318105839	5.70929276099067	3.05874392212038	-1.65974223521496	-0.820487302506857	-1.33595877129779
81.5	48.5	145.055555555556	13.2314732154345	5.70737519388944	3.10172191080584	-1.68363138255514	-0.887798778318233	-1.30080895120065
81.5	49.5	221.305555555556	13.2337553250075	5.67312326560136	3.08569628505861	-1.66556720150002	-0.803899242522183	-1.45179676876772
81.5	50.5	250.055555555556	13.2180445505341	5.6919958988216	3.06221966971433	-1.69272039950417	-0.862183623378888	-1.49356601215192
81.5	51.5	306.888888888889	13.2312606685718	5.71133804559138	3.04919513091996	-1.70417199574315	-0.877196664391068	-1.50558091820371
81.5	52.5	313.048611111111	13.2344679503107	5.75700918324378	3.04521195000045	-1.69330543391884	-0.874773051647421	-1.49733384844684
81.5	53.5	267.965277777778	13.2748941849863	5.70573492711149	3.05240966499457	-1.70268074378454	-0.982769152006483	-1.38768417664227
81.5	54.5	219.534722222222	13.3036499296087	5.67678362724302	3.06453686252334	-1.69990249956466	-0.965824926987682	-1.33533983823514
81.5	55.5	194.916666666667	13.2971091520099	5.67931681492133	3.10279736320751	-1.68808697014112	-0.898947372196094	-1.4067880352266
81.5	60.5	155.770833333333	13.1923569048987	5.68165075168131	3.08799931830457	-1.69857679791203	-0.931148310323091	-1.29680437402584
81.5	65.5	311.791666666667	13.1479913712647	5.56064359644251	3.00423681770522	-1.70489729059918	-0.933239484893108	-1.63776121189867
81.5	66.5	491.006944444444	13.2047129653169	5.5492509004605	2.93021640963895	-1.74877344809221	-0.790134271250817	-1.82783140088204
81.5	67.5	565.458333333333	13.2105401368275	5.62683244290532	2.9257530885621	-1.67021887991584	-0.79198315149337	-1.71161146582806
81.5	68.5	598.354166666667	13.2376209788069	5.5269610092489	2.98581336048287	-1.67676024131743	-0.802425844664349	-1.69776644588636
81.5	69.5	608.451388888889	13.2265170624794	5.39321481264553	2.98431431613497	-1.70458441391785	-0.83523773096062	-1.67793441427379
81.5	71.5	618.597222222222	13.2089615040832	5.72160810577498	3.01210068830578	-1.64300864855990	-0.744712533357539	-1.60886157526173
81.5	72.5	593.430555555556	13.1784052531730	5.68861311151993	2.99547203841471	-1.62823673977861	-0.740424830737872	-1.73655325956932
81.5	73.5	524.638888888889	13.2357477341529	5.60568259831427	3.03939671612113	-1.61234593694500	-0.689544647949433	-1.57968783206237
81.5	74.5	356.923611111111	13.2545837865168	5.58143947155099	3.00945437898670	-1.65878284185259	-0.705418763378955	-1.55728377389428
81.5	75.5	241.215277777778	13.2203532177035	5.47348557316066	3.01923008427672	-1.71405769479520	-0.832105744093767	-1.56711165679541
81.5	76.5	187.180555555556	13.2663699875328	5.40602764152241	2.87912404246156	-1.70564371395798	-0.825630715068551	-1.54962750310795
81.5	77.5	200.340277777778	13.2252444711792	5.45112540276472	2.98136281613135	-1.70544318236215	-0.897831062216507	-1.47827538543321
81.5	78.5	215.423611111111	13.1876414611779	5.36074470184838	2.86677132917388	-1.69796106096417	-0.85725840901487	-1.50045744230141
81.5	79.5	215.041666666667	13.1932718768245	5.18127504418239	2.81855435554174	-1.75268147309025	-0.854420525527242	-1.54578669528121
81.5	80.5	246.875	13.199139412301	5.23744015330719	2.8362780637264	-1.74687343859360	-0.85295137637778	-1.53230293917444
81.5	81.5	308.895833333333	13.1934739770608	5.18866708460513	2.83854706834615	-1.73847683455439	-0.847033066093561	-1.53651112819705
81.5	82.5	379.854166666667	13.2102493126815	5.33304481989838	2.84418985653667	-1.73068163136543	-0.98001162416949	-1.53011383906071
81.5	83.5	410.805555555556	13.0737107625663	5.14458273382057	2.77830611292973	-1.71966105642332	-0.935089587532815	-2.10185492200604
81.5	84.5	423.5625	13.1178345703637	5.23127967107714	2.78551542542603	-1.67568020987543	-0.81906942807441	-1.62612076687974
81.5	85.5	433.458333333333	13.2589012972126	5.27178968524517	2.86813129817410	-1.73878513606093	-0.705199888555824	-1.52837332146660
81.5	86.5	453.465277777778	13.2286173136238	5.46489965926	3.00294975459148	-1.61058861770463	-0.704890467095142	-1.49786120922373
81.5	87.5	328.4375	13.2174590827872	5.38182661813607	2.91553148343608	-1.66015014496533	-0.831317401408301	-1.74004731413779
81.5	88.5	209.694444444444	13.2436962860276	5.5754975904742	3.019909386899	-1.69791700976599	-0.848287162684626	-1.40011826127774
81.5	89.5	126.3125	13.2493102009639	5.60192677975644	2.89990874111951	-1.73054699354208	-0.898227824765082	-1.22223739139670
81.5	92.5	278.805555555556	13.2511029663010	5.6195480072757	3.01742336047505	-1.65604217089381	-0.950651179051186	-1.44725691140271
81.5	93.5	223.722222222222	13.3897630535460	5.75320291221598	3.08693634311233	-1.72766258094263	-1.06323267678581	-1.4366016517026
81.5	97.5	905.222222222222	13.2320227178902	5.51279038103151	2.96759425128635	-1.95781169200077	-1.18240532306333	-1.75555227851352
81.5	129.5	3903.75	13.0398884873914	4.95923263522882	2.40536409135755	-1.93636295276163	-1.06338149629325	-2.84895682792024
81.5	130.5	3907.71527777778	13.0310807628762	4.94687460246225	2.40169134453884	-1.93399749225063	-1.05706305507055	-2.84497111020403
81.5	131.5	3898.88888888889	13.0490402267315	5.11007389343497	2.45232357435287	-1.91875524919567	-1.04554663371167	-2.82941812395767
81.5	132.5	3860.40972222222	13.0424898301782	4.98886536424647	2.38218431861656	-1.92071951767261	-1.03107891345545	-2.82530740968926
81.5	133.5	3793.58333333333	13.0595838564428	5.33044574142085	2.40470514149624	-1.89739389154770	-1.03479480749876	-2.74607876605143
81.5	134.5	3686.68055555556	13.0083652197574	5.07422104792388	2.41473342279578	-1.87637729151306	-1.04303409323139	-2.63114881451569
81.5	135.5	3485.04166666667	13.0214215668058	5.26987933179055	2.40526986357185	-1.89332702967865	-1.03917374758216	-2.60344895904549
81.5	136.5	3243.13194444444	13.0095102911958	5.38692854680935	2.42462133559355	-1.88130667764338	-1.05118496462562	-2.58217669712743
81.5	137.5	2969.30555555556	12.9778830797777	5.34236767937541	2.44328746876084	-1.87696620100206	-1.00903853325953	-2.61391103063055
81.5	138.5	2425.72222222222	12.9766406162156	5.34523558912646	2.51824300965619	-1.89123284607248	-0.99629182359595	-2.58150355110998
81.5	139.5	1790.27777777778	12.9590368366449	5.18169290225575	2.55216417121547	-1.88125031704608	-1.02279595284623	-2.46015562385993
80.5	-14.5	96.4097222222222	13.343446637119	5.76672371462444	3.23019238280406	-1.72015674161746	-0.81129837363469	-1.14229409525326
80.5	-13.5	151.541666666667	13.3558319896124	5.76051598983786	3.22610659164073	-1.75695332545237	-0.887573204424595	-1.24473541185673
80.5	-12.5	159.826388888889	13.3628895182292	5.7912167893873	3.23279916179695	-1.75244179093038	-0.830657649463182	-1.24587043791207
80.5	-11.5	138.1875	13.2122768349537	5.77409145547828	3.1488547906382	-1.72281603880655	-0.847052385418351	-1.22142865500232
80.5	-10.5	144.881944444444	13.2459588763116	5.79625103469748	3.13904605724959	-1.71049550385284	-0.899528337266734	-1.24365261495292
80.5	-9.5	140.555555555556	13.200077761052	5.7807075134389	3.12339686848058	-1.70327841854603	-0.827535686097765	-1.26046425583065
80.5	-8.5	152.868055555556	13.1695851455704	5.80757671392731	3.11890733886369	-1.68405571225861	-0.851564269397708	-1.28390778855313
80.5	-7.5	257.277777777778	13.0756727073869	5.8042260605965	3.06771309803552	-1.71966492020064	-0.861566720012183	-1.49955422515511
80.5	-6.5	465.506944444444	13.0629562628978	5.78391883505771	3.03787833712294	-1.64274452757711	-0.639333192133139	-1.57606825674800
80.5	-5.5	1152.65972222222	13.1312935756249	5.77244464326913	3.06231581999669	-1.83949598330954	-0.688653197502268	-1.63782976239676
80.5	-4.5	2168.66666666667	13.1392905946847	5.6281600378234	2.95386731257217	-1.89010630869501	-0.679256754150482	-1.85478727977505
80.5	-3.5	2870.86805555556	13.0192839498963	5.57480977643205	2.91427507766573	-1.87403619941503	-0.709686849839395	-1.98673143132393
80.5	-2.5	3430.52777777778	13.0517482048854	5.49388284245132	2.78812809866294	-1.87687076845047	-0.716318588740007	-1.93327981608523
80.5	-1.5	3212.06944444444	13.0340550852034	5.46657969689017	2.82859884094216	-1.90767259414921	-0.884142832413821	-1.97795391860700
80.5	-0.5	2725.5625	13.0074090287397	5.4933737814281	2.85713855520701	-1.89159209678629	-0.848512349254587	-2.01210510788476
80.5	1.5	2348.03472222222	13.0819041650076	5.5838607971377	3.00381814484953	-1.93731042365702	-0.854013079523392	-1.96431431494233
80.5	2.5	1754.26388888889	13.1239275291472	5.64977609118194	2.96676985986982	-1.91847220151798	-0.843827074035496	-1.89738981781583
80.5	3.5	1259.11111111111	13.2123252926576	5.73743240721862	2.95728513360696	-1.93235376607907	-0.760929825272851	-1.71143735336716
80.5	4.5	875.3125	13.2547455574762	5.79082482019921	3.02180406075547	-1.88896141360112	-0.805397736032128	-1.70683806916778
80.5	5.5	730.680555555556	13.2291642062607	5.82009446431456	3.03043426275388	-1.75320649705788	-0.797907824638573	-1.59089443451972
80.5	6.5	681.513888888889	13.2374998616064	5.80366069202897	3.02610089124070	-1.71726444239897	-0.858773301435673	-1.60989575710174
80.5	7.5	726.131944444444	13.2040960524040	5.77437050729198	3.00541280907631	-1.74295011596068	-0.770682114458033	-1.62009655236957
80.5	8.5	775.569444444444	13.2090027891301	5.71049125577034	2.98414313118792	-1.84392257069280	-0.779085864783128	-1.56126011352826
80.5	9.5	809.048611111111	13.2339354011983	5.73261411496478	2.97507085682994	-1.87154673132039	-0.756621731196021	-1.50423297887087
80.5	10.5	852.020833333333	13.2134092248389	5.75292867123493	3.02978667987302	-1.85853750075642	-0.794750453487222	-1.42458143980939
80.5	27.5	139.784722222222	13.1119639934594	5.77953378140148	3.13298737344213	-1.68898208493142	-0.792847589975797	-1.43398549462100
80.5	28.5	217.715277777778	13.1401549041107	5.75378843162383	3.06447585637726	-1.69954092137818	-0.908283450792533	-1.50301539914988
80.5	29.5	324.166666666667	13.1609356093648	5.78319863460433	3.08248918491284	-1.68394775911887	-0.897957554364437	-1.52471887211968
80.5	30.5	189.625	13.1678232693126	5.7775694613264	3.11576581550099	-1.70362824094503	-0.96388169727432	-1.52470803437971
80.5	31.5	111.930555555556	13.1950219444697	5.7990042733441	3.06420268095729	-1.69795631724169	-0.966462502016216	-1.34616178476103
80.5	32.5	84.1180555555556	13.1828228819159	5.75833620978651	3.04160518890677	-1.69938340238709	-0.947051666074117	-1.29359020069066
80.5	33.5	113	13.1415075735275	5.72901729839789	3.04959414995992	-1.71581646598846	-0.982403093005454	-1.47627627714801
80.5	34.5	185.145833333333	13.1543141726330	5.7850051997278	3.05737655928681	-1.74508960091543	-1.00883829785495	-1.71276185385571
80.5	35.5	156.701388888889	13.1626208546412	5.7259210926593	3.02665663070362	-1.73638706903007	-0.999969627150345	-1.48739214147645
80.5	36.5	134.125	13.1996458663927	5.68840492532072	3.05969255999382	-1.73410273529063	-0.932687826050504	-1.40811535484633
80.5	37.5	145.694444444444	13.1551870226980	5.6276153066067	3.05644002718004	-1.74091258126209	-1.00193617109360	-1.78562300322165
80.5	38.5	157.111111111111	13.1081049613609	5.51115320743873	3.03607416813112	-1.78187615487832	-1.12437476346301	-1.89428977608426
80.5	39.5	211.631944444444	13.0743300896999	5.4853215376989	3.00610801515546	-1.80600915813903	-1.17492042016959	-2.28885585074726
80.5	40.5	333.652777777778	13.0446001830218	5.5212643677115	3.00076637981205	-1.78506789626057	-0.982331663997829	-1.87260278476996
80.5	41.5	384.298611111111	13.0374286426324	5.53464609427417	3.03739408304853	-1.77119272166858	-0.902960607514366	-1.77508472437481
80.5	42.5	388.208333333333	13.0472095927416	5.63895155301317	3.03702946396538	-1.71650885577201	-0.831035201974172	-1.6799313717237
80.5	43.5	371.006944444444	13.0582354669375	5.71141837812338	3.03728278326483	-1.71073170967255	-0.792907851188634	-1.68021898052662
80.5	44.5	310.756944444444	13.0132350601301	5.72143225736778	3.02118900461149	-1.68981081170540	-0.805302295056417	-1.74846403582037
80.5	51.5	211.506944444444	13.1115202503621	5.7145260051691	3.08123495299028	-1.70529710089157	-0.932825705975285	-1.48270157431421
80.5	65.5	197.263888888889	13.2167762307967	5.80661384007296	3.08692046577218	-1.76921355192487	-1.02346510713373	-1.70927421372954
80.5	66.5	403.430555555556	13.1597591610594	5.74211843542952	3.12829057480351	-1.6659821969937	-0.940214910877521	-1.96883373026638
80.5	67.5	470.270833333333	13.194458128388	5.68534465895686	3.12267396358537	-1.64095824713852	-0.966786023026079	-1.99085698722769
80.5	68.5	504.243055555556	13.1830948899271	5.46866693819732	2.89746039973056	-1.64473888119000	-0.882045123732081	-1.99978347196609
80.5	69.5	550.722222222222	13.1661457646558	5.4635460248764	2.89905853807834	-1.66669809238157	-0.865299177905909	-2.11996989078389
80.5	70.5	573.340277777778	13.1604987927386	5.48138515645917	2.86378910503432	-1.65699157365808	-0.86071740641674	-2.15168554273299
80.5	71.5	567.673611111111	13.1593142710952	5.52698200259452	2.97767145461424	-1.63280429930511	-0.871086037861402	-2.09876826867623
80.5	72.5	524.298611111111	13.1860505568222	5.59799874509243	2.9833833850399	-1.60598035791120	-0.72924874433156	-1.91859727973889
80.5	73.5	364.194444444444	13.2134360533624	5.70278547726132	3.04960058771774	-1.66667540296672	-0.951113045720233	-2.05122645825553
80.5	74.5	143.861111111111	13.2621929633490	5.72543905697327	3.01124340453073	-1.7035809901298	-0.931304452219212	-1.30709400840403
80.5	75.5	69.7916666666667	13.2190212011242	5.74209276306903	3.09962264473125	-1.63340763922925	-0.888470144908295	-1.15922224250599
80.5	76.5	44.5069444444444	13.2095615388269	5.64377927560898	3.10175827987549	-1.64721820777484	-0.917120798661117	-1.13878834012413
80.5	77.5	54.7916666666667	13.2167997378319	5.64037102885792	3.08942994121049	-1.65536423654721	-0.899949620278344	-1.17770284061510
80.5	78.5	104.277777777778	13.2311757482594	5.67644149813606	3.05069599973101	-1.72867233257526	-0.947498187564222	-1.27664443040743
80.5	80.5	96.75	13.2132031957701	5.55143012800183	2.96537875296274	-1.70695767330260	-0.932359440944552	-1.16581302353460
80.5	81.5	128.486111111111	13.2469430508865	5.4558728112558	2.9817404681071	-1.77915690507086	-1.02274543193260	-1.26154706104238
80.5	82.5	194.013888888889	13.2284630435047	5.429166049642	2.96995347582969	-1.76208124231906	-0.979533457060095	-1.65278440465211
80.5	83.5	274.402777777778	13.1652439341440	5.3924054895448	2.92393042096759	-1.77040379782031	-1.11044179612063	-2.02290692171338
80.5	84.5	304.361111111111	13.1673193716568	5.46054919041758	2.95725857645682	-1.76180347586085	-1.07367727556777	-2.00927720774863
80.5	85.5	313.923611111111	13.3078504762394	5.7267593052608	2.95917110044828	-1.6638270813904	-1.02646784581408	-1.70062661824675
80.5	86.5	296.451388888889	13.3189768468608	5.6981719859991	2.96853944471342	-1.69834389830121	-1.07823821664015	-1.84792659910615
80.5	87.5	259.611111111111	13.3100737523514	5.69880690908868	2.99467347767475	-1.72426873314075	-1.21361990004867	-1.89389626649568
80.5	88.5	228.729166666667	13.3098029705263	5.70898418190546	3.03932598155715	-1.74415345531218	-1.10627028504531	-1.86982488059386
80.5	89.5	167.569444444444	13.3146299891984	5.74176914327268	3.04109219098456	-1.76039611191945	-1.07636212840405	-1.46276582131697
80.5	90.5	112.236111111111	13.294098670514	5.75454097628459	3.01590275240095	-1.70074912797046	-0.92706445055388	-1.05949563827434
80.5	99.5	87.7777777777778	13.1596684780278	5.65708314693242	2.9559531252959	-1.61898668353209	-0.823890377379258	-1.01432991166126
80.5	100.5	121.555555555556	13.2605340614421	5.6127904608936	2.95715819865854	-1.67616163562737	-0.959779645573462	-1.14335495212051
80.5	101.5	200.951388888889	13.2271017571573	5.67077812634827	2.98858203874373	-1.64587714873246	-0.95088793343487	-1.35453753307564
80.5	102.5	393.354166666667	13.1976090265451	5.40127976605261	2.83574605431803	-1.66708037150321	-0.887877533366674	-1.6182047318628
80.5	123.5	3582.09027777778	13.0937607457251	4.70285428537783	2.6357669589356	-1.96020647787520	-1.01402914049964	-2.78714087874879
80.5	124.5	3555.16666666667	13.1252061314001	5.04511451449922	2.52206271285302	-1.96159596651761	-1.03681440533389	-2.67350367300037
80.5	125.5	3611.74305555556	13.0990356394405	4.66853033926259	2.63371681080437	-1.95281600637318	-1.02043241439137	-2.76937488831819
80.5	126.5	3674.71527777778	13.0893539604871	5.01323539328634	2.72695468111494	-1.8966900880624	-1.00681212367264	-2.73179437689140
80.5	127.5	3694.65277777778	13.1161729848355	5.08861021749204	2.6599239406593	-1.93292259314424	-1.00461520172321	-2.48999092523936
80.5	128.5	3700.75694444444	13.1320274733899	5.11568528969668	2.64857660355617	-1.91020785451706	-0.721691947978147	-2.22917101368591
80.5	129.5	3711.88194444444	13.1270099065777	5.19087596216245	2.62853586418472	-1.97408220443638	-0.96482578625637	-2.45002138415556
80.5	130.5	3720.60416666667	13.0712751470573	5.13192854244135	2.39557879206617	-1.96986432218784	-1.01106533730009	-2.51136551625623
80.5	131.5	3713.88194444444	13.072807627125	5.2629882781461	2.38652919815095	-1.91502478902709	-1.0220404329694	-2.55432604710706
80.5	132.5	3667.27083333333	13.0630095748806	5.32719595798928	2.45924895838341	-1.91383714435939	-1.01560470096196	-2.53819241552884
80.5	133.5	3585.71527777778	13.0272962404138	5.37337334408623	2.46096171862556	-1.85966581999241	-0.99690691908187	-2.57391081452351
80.5	134.5	3464.35416666667	13.0231995564366	5.36958516764858	2.40076632340242	-1.87432978579915	-1.03020391249649	-2.58095031847604
80.5	135.5	3286.125	13.0136953059684	5.36222050277141	2.40136077141429	-1.86858197353116	-1.03000518175996	-2.57175290623705
80.5	136.5	3044.70138888889	13.0142472129825	5.39858685037699	2.40914104600966	-1.86566559761999	-0.989499232959627	-2.41059211329596
80.5	137.5	2759.63888888889	12.9808811461847	5.38059440634927	2.47558930083309	-1.83731931466301	-0.985957422862285	-2.42409225300151
80.5	138.5	2351.18055555556	12.9905440632789	5.37911150384442	2.52566857546199	-1.86678128724198	-1.00229112897682	-2.48994543702721
80.5	139.5	2025.32638888889	12.9821483556354	5.26890715378824	2.53331288798939	-1.87394341760427	-0.995154551856579	-2.51459147408134
80.5	140.5	1720.98611111111	12.9672779814090	5.14871413145154	2.54217265866896	-1.90968109132238	-1.01693091254056	-2.38766131667122
80.5	141.5	1666.49305555556	12.9632020631885	5.19135431572418	2.55074100492694	-1.90498610435691	-1.04407187626731	-2.38174556490196
80.5	142.5	1575.33333333333	13.0372071225829	5.38468050160183	2.52693291980279	-1.88522978681073	-0.973845713867895	-2.38649184951766
80.5	143.5	1585.4375	13.0800834666606	5.41514641218967	2.78236507601082	-1.81975748090309	-0.711042478887635	-1.59872222188796
79.5	-16.5	194	13.1689942389753	5.56256804615142	3.0126736440805	-1.69981017970389	-0.837898092898059	-1.62670550697168
79.5	-15.5	118.756944444444	13.2222554682219	5.73513233236923	3.05996808676601	-1.67818522375531	-0.91662749071999	-1.36079826706385
79.5	-14.5	60.3541666666667	13.1525046973469	5.72537190123164	2.99964333917191	-1.59836029112405	-0.830939133581556	-1.30756082256725
79.5	-13.5	131.041666666667	13.1275301211039	5.64166837643257	3.00691973200645	-1.67575452717744	-0.863397061921882	-1.39660022642396
79.5	-12.5	149.972222222222	13.1459809440040	5.42187776870195	2.97665336767699	-1.76865876135377	-0.894906584190374	-1.44611744345704
79.5	-11.5	216.923611111111	13.1525989415797	5.24480586201348	2.96648432821176	-1.76898593799546	-0.905165647719705	-1.80951552711642
79.5	-10.5	209.652777777778	13.0992418596131	5.23591294678138	2.96067178227254	-1.77774608908242	-1.03979059640628	-2.29259929711046
79.5	-9.5	190.5	13.0951917803337	5.50567122033868	3.01927776285274	-1.73466586133140	-0.996727051994241	-1.94344202151599
79.5	-8.5	184.868055555556	13.0835997896383	5.72402262549333	3.05867274464579	-1.66902798339663	-0.895308109548648	-1.69215379710225
79.5	-7.5	224.069444444444	13.0502565799925	5.7627782399939	3.04080735938040	-1.66590928847339	-0.927975019932132	-1.63375887650041
79.5	-6.5	286.819444444444	13.0618754290482	5.74274724162194	3.06061685487605	-1.66815482503341	-0.848359466231382	-1.82438496331289
79.5	-5.5	617.888888888889	13.0101571862397	5.61242938136617	3.00627699334144	-1.64630560320998	-0.686343024729616	-1.91081956263506
79.5	-4.5	1415.40277777778	12.981995280965	5.51924937029683	2.9256059519595	-1.88371967780158	-0.691554260940553	-2.00068577991203
79.5	-3.5	1940.57638888889	13.101518969322	5.52668552647622	2.91636018190247	-1.86663645271813	-0.704599642389571	-2.01328895718783
79.5	-2.5	2339.27083333333	13.0248539450915	5.45112373668998	2.92012810400851	-1.90346128784606	-0.803919775190355	-2.08078331705918
79.5	-1.5	2568.79166666667	13.0026231808995	5.59503796791717	2.92905313193023	-1.93454189603422	-0.770958481293682	-2.10893984062576
79.5	-0.5	2694.55555555556	12.9976761102611	5.63284614690578	2.94255860675622	-1.88259801168935	-0.739625024773842	-1.9431172038878
79.5	1.5	2775.48611111111	13.1259435904165	5.65928281704363	2.83696667219366	-1.88781893084097	-0.765107021973112	-1.87751078330770
79.5	2.5	3225.32638888889	13.1484491874875	5.6981911585305	2.82152893405210	-1.88514138898799	-0.738979696271374	-1.85086415661657
79.5	3.5	3280.89583333333	13.0562146560770	5.66953877242152	2.80029304213841	-1.90735293940207	-0.678162325126797	-1.91361211315601
79.5	4.5	2396.15277777778	12.8200958550941	5.73056529729781	2.81249838141702	-1.8908716825569	-0.71013288756349	-1.90069311374694
79.5	5.5	1744.1875	12.7337477022238	5.80008073344666	2.87074961844832	-1.85946418414772	-0.760395896671786	-1.85853890792626
79.5	6.5	1237.52083333333	12.7589613393873	5.8160206639647	2.86810172452323	-1.85221912403376	-0.753262055153072	-1.85099954867881
79.5	7.5	885.104166666667	12.8048666233738	5.83238493706872	2.93148261987409	-1.85209570501129	-0.710957445096377	-1.85046514181295
79.5	8.5	425.013888888889	12.8229119708299	5.86465331333332	3.01808527745278	-1.6170558613976	-0.770553199649438	-1.74831262849688
79.5	9.5	244.909722222222	12.8031159137483	5.87734447346847	3.13136913084976	-1.64761646837486	-0.84727947596766	-1.66054425392417
79.5	10.5	117.833333333333	12.8536683793255	5.91325477351922	3.22305323299990	-1.59519334311604	-0.869629564699372	-1.42405381169360
79.5	27.5	159.451388888889	13.0337161466862	5.63635476870683	3.1011712065485	-1.71805572916929	-1.01759048385849	-1.58903385336581
79.5	28.5	212.569444444444	13.0304863443257	5.60989003952722	3.06398724923390	-1.67773134592144	-1.00499159280886	-1.71716901144606
79.5	29.5	238.972222222222	13.0559765595597	5.63789360433234	3.01575736677112	-1.71259005991804	-1.00367432052776	-1.75093131593454
79.5	30.5	161.055555555556	13.0312410414415	5.6234673285424	3.01366947507002	-1.73159902234782	-1.02579870621039	-1.51242837604156
79.5	31.5	165.854166666667	13.0115778849002	5.65821253811616	3.04282821880899	-1.72333841110807	-1.00420335177731	-1.52277606981986
79.5	32.5	201.013888888889	13.0092675930254	5.70260399531012	3.03918206952703	-1.73030512880181	-0.944372225615641	-1.74513476718830
79.5	33.5	245.020833333333	13.0430778086684	5.75517988420618	3.03726371573942	-1.74685921753983	-0.922921637398756	-1.78556006530799
79.5	34.5	258.770833333333	13.0606134260339	5.66098065571822	3.04521455960821	-1.72635251672439	-0.972870888604686	-1.77560320393224
79.5	35.5	254.701388888889	13.0144583265633	5.67357017354614	3.01574131156336	-1.73269008843099	-0.931488931942714	-1.74184316284942
79.5	36.5	253.652777777778	13.0176544672251	5.66896530903145	3.00706437019930	-1.70229854998286	-0.96151675853323	-1.73110034015586
79.5	37.5	260.006944444444	13.0129224792536	5.75527436569739	3.01843795730401	-1.72364088764905	-0.982144732074372	-1.88477857312329
79.5	38.5	271.638888888889	13.0025731996864	5.67670718795211	3.01506060115863	-1.72044501098087	-1.02209498154187	-2.30073890613416
79.5	39.5	277.3125	12.9892703029801	5.67256759694306	3.01056477604971	-1.71559743800803	-1.10389560142450	-2.29986640009441
79.5	40.5	273.819444444444	12.9984946718561	5.6951681737305	3.01544238807667	-1.71375906939115	-1.07482633496376	-2.26351935325696
79.5	41.5	303.833333333333	13.0086104808739	5.61292826062168	3.02825798227755	-1.73573438043356	-1.11475238204463	-2.26945257134583
79.5	42.5	324.402777777778	13.0024732951397	5.6205414055203	2.99281232356166	-1.73625736427848	-1.15369248111079	-2.33701432578965
79.5	43.5	285.333333333333	13.0200647473457	5.58821470848536	2.99912446522209	-1.68311311808984	-1.14222704921539	-2.28316863709357
79.5	44.5	205.8125	13.0880774007972	5.6669321905369	3.05506630434799	-1.71406663032395	-1.19192121230104	-2.258058353418
79.5	45.5	181.048611111111	13.1529754512133	5.74503147376552	3.05923675607504	-1.74472994630225	-1.15988782752787	-2.10510812512921
79.5	46.5	215.194444444444	13.1321914917795	5.7329515914146	3.05392274547318	-1.78569046105992	-1.15758174853964	-2.16895898101730
79.5	47.5	260.972222222222	13.1288756615489	5.73112883675531	3.04902931415604	-1.72751509732496	-1.15209942781225	-2.07372965913229
79.5	48.5	285.861111111111	13.1241323450135	5.82072622019219	3.05447458344897	-1.67903554555632	-0.979908517897679	-2.00863131712024
79.5	49.5	254.493055555556	13.1232246207097	5.78008350657482	3.07889677894165	-1.63613127698736	-0.828633807667415	-1.60462751945047
79.5	50.5	220.916666666667	13.1418533700293	5.85246901278605	3.07575010131372	-1.64443281561659	-0.92306629039002	-1.61733919698648
79.5	51.5	248	13.1410195847034	5.85005071750118	3.06270774020924	-1.71525598495047	-0.91939786616806	-1.66025180992329
79.5	52.5	291.055555555556	13.1213699081682	5.75343066640032	3.03431960687585	-1.68576801484448	-0.952697129766983	-1.69426154150910
79.5	53.5	262.826388888889	13.1370652765290	5.84319309320988	3.05644232559357	-1.69230648889975	-0.984577739845533	-1.67844786010865
79.5	54.5	262.423611111111	13.1374127965145	5.8337289064056	3.1027063739045	-1.69724947691848	-0.927121581093816	-1.65955158664565
79.5	55.5	219.388888888889	13.1176846659661	5.82009198158999	3.08110614658868	-1.70689965557706	-0.88230764033584	-1.63837331383662
79.5	56.5	200.298611111111	13.1581299671475	5.78355806717184	3.05458544442115	-1.72567644447231	-0.922649506380777	-1.73783053304307
79.5	57.5	200.027777777778	13.1320777262337	5.72720225244797	3.0461874919033	-1.73578581823826	-0.915451930620763	-1.70728763810481
79.5	58.5	195.090277777778	13.1105525555683	5.72454023359648	3.04556088697869	-1.73557518721873	-0.923363166275663	-1.71111656715297
79.5	60.5	202.111111111111	13.1025046233098	5.73142551497912	3.08077192828529	-1.73630863761901	-0.893161520249656	-1.70367287169633
79.5	61.5	177.611111111111	13.0851802559838	5.7257579324737	3.07274793327812	-1.72599122259546	-0.864727151907924	-1.63676126434501
79.5	62.5	187.208333333333	13.0849797697910	5.7274801814175	3.07035558158704	-1.73056420121806	-0.921752706572253	-1.68781634913848
79.5	63.5	202.402777777778	13.0782873620981	5.70236607118545	3.07309465624743	-1.74219545675768	-0.933633594559026	-1.71575801856475
79.5	64.5	251.381944444444	13.0995988826772	5.63901254817599	2.99427839387391	-1.75850522386945	-0.81872781257111	-1.77347484168378
79.5	65.5	366.979166666667	13.1214579471371	5.70290449313642	3.03363845416482	-1.69328902653398	-0.877853718334455	-1.8406076653363
79.5	66.5	458.118055555556	13.14203036561	5.76462329725748	3.01772248514375	-1.65503053219976	-0.807703735357451	-1.78392753848121
79.5	67.5	487	13.1082451397868	5.76194160277521	3.04724606765540	-1.64333325945443	-0.783470489295742	-1.78724867916885
79.5	68.5	512.604166666667	13.1314629063602	5.7359358889793	3.03730562811948	-1.63431135611070	-0.781090258565273	-1.77955413984700
79.5	69.5	512.215277777778	13.1446285618844	5.73081584215761	3.02773924688804	-1.65525702119133	-0.808037377862653	-1.86583989066813
79.5	70.5	524.444444444444	13.1348608863264	5.57920813622202	2.89078874076857	-1.61767908349144	-0.728217941489535	-2.01869643996321
79.5	71.5	518.479166666667	13.2003659006597	5.75226064510177	2.99015876388088	-1.64681197625572	-0.778414243278043	-1.67558238221065
79.5	72.5	475.3125	13.2205122163645	5.76549755973675	3.03025510203191	-1.63372718269517	-0.800280870748296	-1.56912731335669
79.5	73.5	389.291666666667	13.2322641813062	5.7657837713626	3.04935187783976	-1.6757630565944	-0.907754586968172	-1.96962228195196
79.5	74.5	255.097222222222	13.2336165730915	5.76485932167713	3.03694103521767	-1.69330929819107	-1.11552632830246	-2.03437994407452
79.5	75.5	148.201388888889	13.2221214679922	5.78664948455954	3.03995700475460	-1.72469977400114	-0.941699973861829	-1.46403956265657
79.5	76.5	116.013888888889	13.2014308928145	5.72405914657886	3.079406900911	-1.70922740435236	-0.83198275919605	-1.32949413517974
79.5	77.5	112.180555555556	13.2024287622727	5.7272074195335	3.09280433443321	-1.70042993933619	-0.905833431940552	-1.30256340145388
79.5	78.5	117.548611111111	13.1838208646007	5.67566937540375	3.03261723626449	-1.71444359888504	-0.913338980758765	-1.33772666888765
79.5	79.5	63.6597222222222	13.2118598181068	5.6163313548713	3.00678368779316	-1.68028348075630	-0.900400188990888	-1.23476711097235
79.5	80.5	51.1319444444444	13.2083476988721	5.62021571420324	3.03047230730505	-1.66418868549285	-0.91357177921974	-1.26838971464962
79.5	81.5	57.25	13.2189375419399	5.6408463183755	3.02351785078402	-1.66143956267536	-0.966039973030306	-1.22049261941555
79.5	82.5	82.4375	13.2275590785038	5.69220986346716	3.02790941329617	-1.68972993713284	-0.973538231136825	-1.15186425534258
79.5	83.5	168.277777777778	13.272573175688	5.6892753171092	3.05461565860651	-1.69337327560083	-0.93964151556164	-1.25944238912794
79.5	84.5	190.9375	13.2834870274441	5.70755320401838	3.08657675956643	-1.72256736611175	-0.83299192561175	-1.52525490891972
79.5	85.5	185.1875	13.3083257278637	5.69379164572889	3.03391947911864	-1.68621688054740	-0.8604791326055	-1.45774195126292
79.5	86.5	194.791666666667	13.3309049435677	5.67233429057938	2.98614920265331	-1.66994518234588	-0.905819998506898	-1.42295105894230
79.5	87.5	193.444444444444	13.3420555533991	5.74637530132179	3.05209488139505	-1.75095574962264	-0.981896051478853	-1.42762149802965
79.5	88.5	166.361111111111	13.3356002901477	5.77553063482528	3.06049634398152	-1.72087512793386	-0.949693095313854	-1.13986666085632
79.5	89.5	129.826388888889	13.3411862053293	5.7963668202909	3.06214195125743	-1.70886245015622	-0.919058334137597	-1.11286130892646
79.5	90.5	96.6944444444444	13.3214691376557	5.816368274175	3.03855254994196	-1.66550306761532	-0.954141234872516	-1.03064939048109
79.5	104.5	197.048611111111	13.2523380080384	5.72547935520255	3.06531733487354	-1.62295110198507	-0.887053650318565	-1.28303815895835
79.5	105.5	285.270833333333	13.3026230821515	5.76098655411281	3.08835706293036	-1.63877900240005	-0.870775064774276	-1.34757816579046
79.5	106.5	415.659722222222	13.2727012507280	5.77883461019341	3.04256678259265	-1.60626969221383	-0.729415680264884	-1.37760707190304
79.5	107.5	674.75	13.1744535039178	5.6346280948956	2.98232682588124	-1.62934796672293	-0.82135560896576	-1.55984961227382
79.5	108.5	1039.01388888889	13.1510403450882	5.5910007847463	2.96658780230600	-1.78687038770803	-0.90589381989807	-1.85656281863837
79.5	109.5	1517.28472222222	13.1650631735570	5.59270795222741	2.97907498128688	-1.79785835112552	-0.901556225714763	-1.85004356226562
79.5	110.5	2018.09027777778	13.1379320262757	5.55676861181453	2.94757389795017	-1.81315935388908	-0.926557923498809	-2.07103609603659
79.5	111.5	2449.05555555556	13.1451216799669	5.53686248712068	2.86368050704336	-1.83153004438171	-0.921013586961628	-2.24519890296337
79.5	112.5	2679.69444444444	13.1190641491694	5.5537701422881	2.92403037202495	-1.80237221999557	-0.842889806057985	-2.12952961753246
79.5	113.5	2837.88888888889	13.1303009151833	5.64067497300377	2.89069423540641	-1.82174265975778	-0.820562224681252	-1.99483570073584
79.5	114.5	2893.11111111111	13.1254007747006	5.69857326610928	2.85529723815841	-1.81902158820770	-0.84039144902039	-2.27591588115296
79.5	115.5	2905.03472222222	13.1150330684971	5.58097864989819	2.87056340316078	-1.81651694321325	-0.7950462739864	-1.83678505144406
79.5	116.5	2941.04166666667	13.1366841951667	5.31800632103728	2.84064893497413	-1.82810609947870	-0.753180576020203	-1.74380120909901
79.5	117.5	2985.52777777778	13.1590411424329	5.22418562643512	2.83440173452351	-1.88293216794800	-0.836531119405334	-1.76362536718495
79.5	118.5	3034.83333333333	13.1940467878929	5.4422684703585	2.84051549932772	-1.85619063076509	-0.843630042135411	-1.82820703054838
79.5	119.5	3091.25694444444	13.1419081672511	4.92398790816523	2.82629118982718	-1.91586575443777	-0.944269356289357	-2.51584259898776
79.5	120.5	3137.61805555556	13.1747938685641	5.3134114045745	2.71973744934201	-1.90939717696292	-0.861148952459904	-2.40641488455816
79.5	121.5	3167.22916666667	13.1331054113339	5.28024833958238	2.76398550947568	-1.87672638103435	-0.918109441269416	-2.31745335426306
79.5	122.5	3188.875	13.0944202361517	5.21721011032911	2.69713096975226	-1.89063962011697	-0.896249253359073	-2.45453944565251
79.5	123.5	3226.86111111111	13.1262188591779	5.06051184890616	2.71194059270728	-1.94559758215076	-0.949888099119913	-2.64827815942430
79.5	124.5	3297.88194444444	13.1589324947149	5.33240562478172	2.78758294229776	-1.87638912482849	-0.913946702783284	-2.5249560726977
79.5	125.5	3210.67361111111	13.1304027505114	5.21903179624631	2.78514172849732	-1.9052282077957	-0.926762817965578	-2.54263988981696
79.5	126.5	3218.89583333333	13.1202465922450	5.25561827970144	2.75523075022578	-1.88286962374539	-0.931195558022641	-2.50903901627323
79.5	127.5	3234.25694444444	13.1197613976615	5.33960806154109	2.72938062146795	-1.85921579013322	-0.932388134421582	-2.46423795208068
79.5	128.5	3245.73611111111	13.1199004173902	5.35915644357164	2.71462425383627	-1.84394074547907	-0.928179334815819	-2.45479304245890
79.5	129.5	3245.5625	13.1238454865904	5.41319965944876	2.70990954469440	-1.82473178510324	-0.963855874837666	-2.47797081001039
79.5	130.5	3242.41666666667	13.1027970363692	5.43140910040316	2.5951145018222	-1.85408181929872	-0.958216141657977	-2.47609785530440
79.5	131.5	3220.04861111111	13.1333164033386	5.48664600909487	2.60253269759328	-1.90755676086271	-0.99671067731258	-2.50619108653991
79.5	132.5	3221.74305555556	13.1247205214291	5.56903565327876	2.62416698483136	-1.89128447360443	-1.04420285016754	-2.47815633870427
79.5	133.5	3170.80555555556	13.1152323586257	5.47901143730656	2.66103239817348	-1.90039672777978	-1.02527805850006	-2.48205533435113
79.5	134.5	3059.48611111111	13.1209191425392	5.47142478789222	2.66441230668833	-1.92213579282297	-1.02518353336272	-2.48418305230605
79.5	135.5	2967.72222222222	13.1227859566316	5.41140469268539	2.66132805708341	-1.90930628922695	-0.995163442494122	-2.49290765479432
79.5	136.5	2790.92361111111	13.0871538850079	5.45731838431936	2.61416739565243	-1.90643486886771	-0.998639177875104	-2.49670240337175
79.5	137.5	2537.4375	13.0502177716417	5.4657769743677	2.61703778846979	-1.85732090136127	-1.00667451114170	-2.45630695963628
79.5	138.5	1964.81944444444	13.1470506234904	5.51838315548488	2.82123885178396	-1.84866794958916	-0.965476055280489	-2.18516952876649
79.5	139.5	1502.38194444444	13.0482407290662	5.46248054170929	2.69299003735115	-1.81032944207167	-1.00212261178698	-2.14856926875558
79.5	140.5	1061.22916666667	13.0544883102489	5.51795578329587	2.58711006539330	-1.84590192145043	-1.04982502235717	-2.14608803760976
79.5	141.5	918.618055555556	12.9876330598061	5.53111040317852	2.61128716116510	-1.87741307249559	-1.09432546386181	-2.19953972634110
79.5	142.5	687.5	13.0866669987158	5.54812318514028	2.87212071855031	-1.67828651895531	-1.08603935850478	-1.98923845254045
79.5	143.5	367.076388888889	13.1701755712663	5.63752527339747	2.86353678459780	-1.61245268810002	-0.720354165931555	-1.47606124355381
79.5	144.5	341.0625	13.1547608115090	5.61807825766372	2.93169721710621	-1.61316264537061	-0.712732679254893	-1.46506345392032
78.5	-179.5	1516.1875	13.0498212542607	4.86727743531299	2.67476731730971	-1.95268157598968	-0.82490859710722	-1.85359067084194
78.5	-178.5	1403.07638888889	13.0440520597791	4.87981094409852	2.70571910600188	-1.93299142592136	-0.811262516061804	-1.83996717946924
78.5	-172.5	2155.31944444444	13.0799270365464	4.88034968973264	2.62348008873961	-1.98159578673048	-0.960291471397514	-2.66823428770839
78.5	-171.5	2341.59722222222	13.0744196115063	4.86661701232437	2.61233101366596	-1.99768391902015	-0.967582556067218	-2.73843680459751
78.5	-170.5	2531.32638888889	13.1082340571438	4.92658825687038	2.61482075043941	-1.97506808595661	-0.942688230519786	-2.65911741126725
78.5	-169.5	2116.68055555556	13.0624783021827	4.64760939365132	2.60506404582754	-2.02972830456428	-1.01332220557269	-2.77869679134433
78.5	-17.5	194.583333333333	13.1920035280724	5.65062882831115	3.03490853155307	-1.67536469016706	-0.86418874969031	-1.56752469553802
78.5	-16.5	321.625	13.1471520862385	5.6392320902615	3.08454890670152	-1.60080894094806	-0.807615230031811	-1.71422072748474
78.5	-15.5	168.451388888889	13.1583473360948	5.67760008365808	3.02123878040075	-1.62807376793885	-0.831079721955846	-1.50360824049867
78.5	-14.5	130.097222222222	13.1627015585352	5.58825173918338	3.00401662411780	-1.65628499944161	-0.971829314359744	-1.66193072525616
78.5	-13.5	159.076388888889	13.114980611096	5.38940627201684	3.00909016724443	-1.71256698474380	-1.09340139522452	-1.90267083954656
78.5	-12.5	190.256944444444	13.1227640111002	5.37490671266291	2.98507877509656	-1.77342294569005	-1.07247886395108	-2.18318810389055
78.5	-11.5	211.340277777778	13.0979066651056	5.20567676981104	2.91152596970234	-1.75698069861360	-0.902337778455794	-1.77652060149101
78.5	-10.5	233.076388888889	13.0771379680254	5.41564094469252	3.01989223996531	-1.71775795503660	-0.811158761813402	-1.77917217802148
78.5	-9.5	242.111111111111	13.0514258993313	5.44784340880703	2.98001862762345	-1.75050416124008	-0.797267068903415	-1.89128010733568
78.5	-8.5	225.638888888889	13.0551809365271	5.50259322196572	2.97509851725545	-1.72817667377789	-0.892345513133225	-1.95798995327002
78.5	-7.5	215.180555555556	13.0426673976491	5.61152135188834	2.99629252528542	-1.70488985856611	-1.00731685775982	-1.90632757566684
78.5	-6.5	281.965277777778	13.0360541031902	5.63132146151704	2.95969432961144	-1.66280019592711	-0.96416125037352	-1.87823390161456
78.5	-5.5	441.979166666667	12.9676356952278	5.66257836957505	2.9485484792868	-1.63031094036533	-0.736070252998567	-1.90019494242476
78.5	-4.5	1231.22222222222	12.9677496663926	5.67325020168768	2.97887974026848	-1.83206668096227	-0.671120211616498	-1.87463697606439
78.5	-3.5	2219.33333333333	13.0218258500561	5.61129639636714	2.9140053227811	-1.89148304345651	-0.568718618284998	-1.92195381079327
78.5	-2.5	2672.28472222222	13.0316231380168	5.61505959981717	2.89070963262564	-1.87358747732335	-0.630487374716166	-1.88663226673489
78.5	-1.5	2773.0625	13.0512109252147	5.6638338451599	2.87817982140022	-1.85382026998482	-0.643855406676088	-1.88686753587901
78.5	-0.5	2766.19444444444	13.0436039876927	5.68496055534742	2.85820908346524	-1.86676093785611	-0.650006716001698	-1.89252997934833
78.5	1.5	2411.65277777778	12.8490475726304	5.69310960202251	2.86185145199059	-1.92142449984957	-0.673734603351357	-1.90745167139451
78.5	2.5	2600.34027777778	12.8158880435808	5.71873972883083	2.84415486185112	-1.86700696939093	-0.64766114543105	-1.89015065153323
78.5	3.5	2442.41666666667	12.7667900616708	5.73293806421929	2.88101597710964	-1.84574548754128	-0.661971564070972	-1.86150594875983
78.5	4.5	2315.29166666667	12.6370109950645	5.77028500419973	2.94703339464274	-1.83555386141474	-0.716458241381898	-1.90478851921225
78.5	5.5	2211.45833333333	12.688765206592	5.79409790321602	2.97504192339374	-1.84110388428486	-0.753528596251626	-1.93832245368368
78.5	6.5	2078.95833333333	12.6424286313180	5.76283734605706	2.96424799954148	-1.83601479104610	-0.768396683506283	-2.05316329553860
78.5	7.5	2130.74305555556	12.6248018822799	5.80531096630727	2.99339950115239	-1.79167892460933	-0.811356167245725	-1.96319467174974
78.5	8.5	1200.04861111111	12.6379001539670	5.91870013003733	2.97287376443236	-1.72122126910991	-0.818844554111902	-1.85170514722766
78.5	9.5	381.979166666667	12.6527524102858	5.98165857579959	3.08460792533432	-1.43820409404229	-0.88796136944348	-1.68278755511339
78.5	10.5	126.277777777778	12.6424929593383	5.95866168474196	3.18227007784018	-1.38926755189074	-0.96659938015021	-1.55631124692607
78.5	27.5	173.930555555556	13.0213558570964	5.62578986739425	3.01565097907473	-1.68567642394107	-1.01258077687687	-1.77893984600663
78.5	28.5	186.569444444444	13.0770887066246	5.7002486184772	3.02977452796785	-1.67527113878150	-1.02856036607887	-1.84969334383923
78.5	29.5	220.277777777778	13.1086954512765	5.58016367499751	3.01814829609795	-1.69208911718371	-1.14031898797747	-2.22228633650435
78.5	30.5	222.097222222222	13.1057930239462	5.55381509785258	3.01840034166634	-1.68412514139602	-1.16781663835849	-2.23044275077356
78.5	31.5	226.201388888889	13.1248292351881	5.67589942054836	3.02800564723815	-1.66374677791040	-1.15261060012867	-2.24772294493769
78.5	32.5	226.993055555556	13.1461090198744	5.66160340536529	3.03797814242709	-1.66793160753432	-1.11063515645808	-2.25498424599123
78.5	33.5	213.958333333333	13.1357495401256	5.69854183173479	3.03726608176475	-1.67322221621852	-0.93769632969891	-1.95055069421564
78.5	34.5	216.541666666667	13.1312355803194	5.68694820046032	3.02209541834449	-1.66814488816339	-0.965938074195358	-2.04152189786682
78.5	35.5	183.013888888889	13.1214696692134	5.6692320534801	3.00638015535753	-1.68005346691440	-1.10212977761984	-2.19019817303205
78.5	36.5	168.645833333333	13.0701273194380	5.66532397162577	3.01611911542321	-1.62100272279307	-1.05001534103496	-1.85754271437785
78.5	37.5	169.590277777778	13.0383008461543	5.58950680337489	3.00583003148981	-1.63436823794665	-1.06725353744593	-1.96088085835688
78.5	38.5	168.590277777778	12.9707005063429	5.5671552049721	2.99208142382304	-1.64715632495836	-1.20833314453770	-2.04757746715248
78.5	39.5	207.819444444444	12.9652598945042	5.5488894983135	2.98238517783707	-1.63662293812553	-1.17552010547976	-2.25849735022369
78.5	40.5	243.715277777778	12.9880071051270	5.54548737996805	3.00028961558997	-1.72260775021162	-1.17380831930753	-2.2643507792048
78.5	41.5	256.173611111111	13.0529237935343	5.60470659069967	3.01868952055945	-1.66022713313257	-1.12408754096932	-2.25812168297833
78.5	42.5	259.756944444444	13.0676942585545	5.55407298054787	2.99275489707195	-1.74958896434830	-1.19935410151187	-2.27331050251673
78.5	43.5	240.229166666667	13.0616499078017	5.58413708375398	3.01044737798247	-1.73691263154915	-1.21729333748236	-2.14625977913379
78.5	44.5	252.25	13.0978538239255	5.60186361394012	2.98580366651442	-1.75820389695700	-1.21484189210201	-2.20659801263646
78.5	45.5	262.756944444444	13.1574357106453	5.63814248636343	3.01234573561169	-1.69495458600238	-1.17602174657176	-2.22061497790189
78.5	46.5	241.881944444444	13.1415507129917	5.69331502230007	3.01911225856226	-1.69350339582803	-1.19794913112601	-2.21359041534291
78.5	47.5	274.173611111111	13.1306881521613	5.6173497143297	2.98819809466021	-1.67293231007944	-1.17166755173539	-2.29106223604526
78.5	48.5	289.618055555556	13.1208308705785	5.64472652629714	2.9950460622275	-1.67119946383609	-1.14003817678014	-2.24951412133342
78.5	49.5	270.916666666667	13.1418621113953	5.76314698284563	3.01831714272225	-1.65288291152122	-0.932733892766498	-2.16816877515973
78.5	50.5	268.958333333333	13.1338794753527	5.73566501911146	3.01716152618332	-1.62236970198891	-1.03682900891492	-2.15112621389051
78.5	51.5	254.583333333333	13.1298044195911	5.74961668984468	2.99174847203035	-1.63327124881129	-0.947493106565823	-2.13950488100370
78.5	52.5	252.652777777778	13.1198192349283	5.71874439809075	2.99510343886816	-1.68069227079936	-1.10887706533984	-2.23814097657572
78.5	53.5	269.756944444444	13.1240268509066	5.67383040209924	3.00322562245960	-1.67653772623264	-1.10291763653900	-2.20551702387934
78.5	54.5	243.604166666667	13.1349131021204	5.72161629882648	3.00696140185722	-1.68110276266562	-1.11112078730481	-2.26932776861665
78.5	55.5	217.493055555556	13.1559363405539	5.66311610678089	3.01401623012599	-1.69375755469841	-1.11968872216504	-2.21794078664665
78.5	56.5	192.402777777778	13.1518627853720	5.69020681892028	3.01956650393737	-1.66175065662446	-0.938405179020026	-2.11605823862613
78.5	57.5	186.4375	13.1487590861299	5.7361919487196	3.04409504745962	-1.67738100527794	-0.937838255368247	-1.87893843763419
78.5	58.5	198.3125	13.1502030403231	5.66047922431242	2.99756001601126	-1.69838596386848	-0.959803356617084	-2.09437372592450
78.5	59.5	228.944444444444	13.1411886231056	5.65996823434352	3.00485909150585	-1.75598440350874	-0.940307333192637	-2.11924375415972
78.5	60.5	247.583333333333	13.1338718636340	5.68750111530395	3.01279511256779	-1.71840920242076	-0.855305977473325	-1.89632743438724
78.5	61.5	280.840277777778	13.1387901357985	5.68963631594475	3.01901362233043	-1.73213799142677	-0.882665623176039	-2.17960286159845
78.5	62.5	301.631944444444	13.1324963955672	5.6733737481008	3.00467353514549	-1.69497064263177	-0.95375832289393	-2.15326822466310
78.5	63.5	307.645833333333	13.1274239470594	5.58579041336128	2.98191784726084	-1.70519466873543	-0.955636352219592	-2.18766618445601
78.5	64.5	317.479166666667	13.1324988862923	5.5728014410756	2.98051290411445	-1.69273526739805	-0.95885306923603	-2.23886073515977
78.5	65.5	330.75	13.1449858985443	5.41537966568265	2.99027806574929	-1.72893843120270	-1.01211796959097	-2.16146863813105
78.5	66.5	345.3125	13.1359208669271	5.48719959672348	2.97705674347742	-1.7076799186543	-1.00504769805368	-2.19690805757567
78.5	67.5	371.722222222222	13.1279569759545	5.59232988560251	3.00202830733119	-1.63745306288007	-0.953380696128503	-2.15950163776947
78.5	68.5	404	13.1502352185350	5.61333772037534	2.99734080928968	-1.6458948566647	-0.911781677264679	-2.1546753584425
78.5	69.5	419.770833333333	13.1832842082018	5.62010244605286	2.98941899395738	-1.66491816476519	-0.926257654686987	-2.19489554335977
78.5	70.5	433.236111111111	13.1997897114228	5.65394814560788	3.01570597530246	-1.67663152680133	-0.925913331158778	-2.13331811466447
78.5	71.5	443.666666666667	13.1925004238042	5.67090455885083	3.02034159383737	-1.66833209204625	-0.9173072527665	-2.15289143561372
78.5	72.5	437.0625	13.1916547961326	5.67803547954036	3.01843638379151	-1.67187655165181	-0.924019364183468	-2.08982023540515
78.5	73.5	399.993055555556	13.1943405498090	5.68413817617052	3.06499716020983	-1.6496001349238	-0.98224343740965	-2.06268767631479
78.5	74.5	341.486111111111	13.2065499053460	5.73473611946485	3.06975020986415	-1.64145805913839	-1.09880492369959	-1.9068920690059
78.5	75.5	272.013888888889	13.2592361320308	5.75275899818079	3.02099857740502	-1.69685149608478	-1.07378394349943	-1.90886878231410
78.5	76.5	203.201388888889	13.2335175742482	5.7155774582544	3.01746516291263	-1.70696409853877	-1.11309315939351	-1.91674118419534
78.5	77.5	149.75	13.2156509214913	5.71527740803086	3.02056070285346	-1.69107379256025	-1.11224668574731	-1.67476668739958
78.5	78.5	112.715277777778	13.2270378866153	5.71790400589367	2.99560268422045	-1.72240539542841	-1.16141792327419	-1.69108116079313
78.5	79.5	87.4722222222222	13.2424110750097	5.76111602822909	2.98548406460365	-1.71331699475987	-1.16177108589141	-1.61656423046506
78.5	80.5	60.3055555555556	13.2615050652711	5.7723397327141	3.03059456138055	-1.65033859085899	-1.16174827386423	-1.58254682970721
78.5	81.5	45.7569444444444	13.2542691295213	5.77550558181175	3.0311838583796	-1.66311966362917	-1.15229906942702	-1.60681578769799
78.5	82.5	58.8402777777778	13.2542255987354	5.77198178669089	3.02438715882153	-1.66236526466048	-1.16179287020779	-1.60953387222402
78.5	83.5	96.5833333333333	13.2574693087705	5.75419218007474	3.01767958123184	-1.69211322907661	-1.15523959451288	-1.57829973345699
78.5	84.5	84.2152777777778	13.3047276685458	5.77600606674999	3.03328090626328	-1.71970178664841	-0.882685295463344	-1.15754271968947
78.5	85.5	81.7152777777778	13.3362337299120	5.77418291524935	3.06771298362671	-1.68202654696797	-0.856254132950627	-1.17215163631132
78.5	86.5	125.340277777778	13.3213159372607	5.76930308150716	3.04138989620645	-1.72434001218837	-0.905084188009046	-1.59019239695005
78.5	87.5	156.465277777778	13.2576800722028	5.69997367704394	3.02488501587534	-1.72564836596598	-1.14333849125364	-1.67123750357523
78.5	88.5	150.111111111111	13.2552610592757	5.79027248660033	3.02645786656781	-1.73514138258012	-1.11895185789620	-1.63040154672414
78.5	89.5	91.2777777777778	13.2486902488005	5.8163966747027	3.04788863437425	-1.71628516497240	-1.17551959581110	-1.47793407043364
78.5	90.5	66.7222222222222	13.2663354253631	5.78825201743936	3.06298714112966	-1.6596458253154	-1.25010987031488	-1.47132390872788
78.5	91.5	61.0416666666667	13.2965663036684	5.79574543484391	3.03309224463761	-1.64900788372551	-1.12888297149499	-1.48432296543759
78.5	92.5	52.5277777777778	13.3041504129513	5.78312196125478	3.03504371471094	-1.61873367939150	-0.91320872696119	-1.35244053007825
78.5	93.5	47.8263888888889	13.2872140129548	5.81290204251155	3.02524212603917	-1.61131693442034	-0.88452631284064	-1.09594568487344
78.5	106.5	121.1875	13.3532074611714	5.76024042610928	3.10046425531848	-1.69455169984152	-0.774397677564841	-1.09313459365309
78.5	107.5	102	13.3544388013238	5.86014332054686	3.10256348786146	-1.68082131130331	-0.94598063949721	-1.07285351588348
78.5	108.5	140.631944444444	13.3082345975956	5.6927787983613	3.10538587293146	-1.66085410024187	-0.951877019400137	-1.10018513023970
78.5	109.5	178.381944444444	13.3650479631494	5.70295628326564	3.07937561220549	-1.63419370154444	-0.930842249972126	-1.24346381286696
78.5	110.5	235.631944444444	13.2658445125464	5.821704826021	3.0741873477468	-1.66941954967075	-1.02755854195709	-1.67614223699165
78.5	111.5	439.694444444444	13.2478881514912	5.80857680598103	3.07230465096489	-1.60619064761722	-0.78618211724992	-1.40514443179407
78.5	112.5	679.722222222222	13.1718520919496	5.59639378615416	2.98507333083974	-1.64643055792417	-0.854168091550986	-1.72210216338863
78.5	113.5	850.25	13.1646225725213	5.52076941815347	2.97083466944538	-1.76621355689634	-0.95600373863924	-1.79408087569359
78.5	114.5	1078.67361111111	13.1895637886161	5.51615034563108	2.97682250071071	-1.79481895057245	-0.981754791528204	-1.82830261762470
78.5	115.5	1359.10416666667	13.1914376722987	5.59535911516084	2.99527446437486	-1.78105413433364	-0.927782209322612	-1.86688896323554
78.5	116.5	1720.35416666667	13.1656040949684	5.57703727959252	2.96686773203492	-1.80213517400158	-0.954360892475313	-2.05892881940277
78.5	117.5	2025.0625	13.1444798789189	5.36984298786378	2.95996024689859	-1.85044925348369	-0.928740254884236	-2.41530528680543
78.5	118.5	2219.29166666667	13.2074855986555	5.36883638651053	2.98056981559576	-1.86393902492123	-0.935084589353988	-2.42382054371541
78.5	119.5	2365.54166666667	13.1429386394763	5.33893693269518	2.94976789733647	-1.87188515792875	-0.992631315743688	-2.50343240234671
78.5	120.5	2492.63888888889	13.1459557801219	5.14258879952673	2.91039112664385	-1.88264007799014	-0.999401031301496	-2.64826907495877
78.5	121.5	2598.77083333333	13.1501335889481	5.42491455743503	2.94704811631208	-1.837005478485	-0.96270763058534	-2.4484391481111
78.5	122.5	2690.66666666667	13.168102912732	5.42153504205292	2.83682417921219	-1.82666380565137	-0.974424046657897	-2.24556093613590
78.5	123.5	2673.94444444444	13.1610516311173	5.47649924171928	2.83228718882748	-1.8245628006239	-0.967581112251204	-2.22811585404771
78.5	124.5	2606.95138888889	13.1381459280522	5.5150034779042	2.90104760530812	-1.82411267212545	-0.949851936752772	-2.25625323611234
78.5	125.5	2625.25694444444	13.1587996110678	5.50221384364866	2.89274797478598	-1.80435534438524	-0.980694670180153	-2.24815945535389
78.5	126.5	2632.04166666667	13.1449905432199	5.5089507544514	2.88810131992101	-1.7982218800271	-0.94816336069086	-2.27558430955194
78.5	127.5	2653.8125	13.0991899815051	5.52013403380851	2.75531158453954	-1.77349823081213	-0.99940410980824	-2.26471017822702
78.5	128.5	2611.20138888889	13.1189269385394	5.5744123848549	2.75135317914875	-1.79987949422703	-0.951650055578	-2.41506058237383
78.5	129.5	2395.25	13.1146982607031	5.48812705027118	2.76574675357458	-1.81165062048887	-0.953111304919345	-2.42384724616531
78.5	130.5	2234.79166666667	13.1156487950037	5.52257127209258	2.79487673401986	-1.80059817682559	-0.95095054427043	-2.36970576650172
78.5	131.5	1880.18055555556	13.1419254798412	5.55989977331606	2.82565393005826	-1.79901478003347	-1.02062868259077	-2.15847042385365
78.5	132.5	1642.5625	13.1379128846771	5.61054033517533	2.84109059305678	-1.79901373836201	-1.04628872340098	-1.9948699501064
78.5	133.5	1357.86111111111	13.1268673068481	5.62556214760054	2.83941256036749	-1.79430129958054	-1.06223633731773	-1.93429945181991
78.5	134.5	1093.50694444444	13.1574729078142	5.65132190569099	2.83759494014118	-1.81332944333680	-1.06810109575245	-2.00928561725076
78.5	135.5	988.923611111111	13.1643873386486	5.66065358312957	2.81753418764206	-1.83826115229441	-1.05643879111831	-2.01180574470969
78.5	136.5	677.006944444444	13.1648266186956	5.64428822390761	2.80353331005412	-1.70673097267598	-1.00635861950282	-1.93605350779715
78.5	137.5	433.340277777778	13.1687450054426	5.57037043318392	2.80312237622877	-1.64636316649731	-0.99364910182608	-1.95832252652916
78.5	138.5	205.194444444444	13.2499537445469	5.69689797695104	2.84989425338299	-1.69929009150563	-1.21477299714976	-1.88162964264237
78.5	139.5	88	13.2072390094586	5.74998478901076	2.88500880118179	-1.64832989080198	-1.24450822528601	-1.47616849525576
78.5	140.5	75.7430555555556	13.2894248715767	5.67754969920232	2.84285013553159	-1.72765962568695	-1.19406832669426	-1.53619144499935
78.5	141.5	73.6805555555556	13.2947153707904	5.66404317540604	2.95028761016134	-1.67848828175195	-1.16418361731714	-1.49691087873408
78.5	142.5	75.7222222222222	13.3032603617824	5.76327260254844	3.01285971899013	-1.75402754947891	-1.10176664345958	-1.50308092321189
78.5	143.5	73.1805555555556	13.3220255122097	5.7330806473611	3.05641130900032	-1.71447380601169	-0.971436360096916	-1.20960402052779
78.5	144.5	71.2430555555556	13.3011199610728	5.7569320900456	2.93984676719292	-1.66210891891290	-1.18146320322558	-1.42071797134785
78.5	145.5	69.8472222222222	13.2857059087583	5.73030467386356	2.80730479450368	-1.62285811743271	-1.19028510330106	-1.48063694786031
78.5	146.5	69.2708333333333	13.2034229208944	5.68616476950255	2.78195219027621	-1.63585256910422	-1.14468594137388	-1.48247848527745
78.5	147.5	70.1527777777778	13.2822713912686	5.60972212527737	2.9288056411662	-1.68680390790992	-1.16062846760486	-1.46918732911716
78.5	148.5	70.9861111111111	13.2187746504021	5.72902211113801	2.85962651369853	-1.65737260647377	-1.15464494573613	-1.58623251106073
78.5	149.5	71.2777777777778	13.2607638403523	5.64620179339492	2.96421117978170	-1.68675810819821	-1.11082748920669	-1.40226752359810
78.5	150.5	70.8541666666667	13.2925483360047	5.65210233479885	2.95398575894832	-1.65088476059317	-0.992303004491022	-1.31510464763716
78.5	151.5	73.0833333333333	13.2653919224314	5.58819233442355	2.87479537604717	-1.64508953242033	-1.10564302556841	-1.48635508706879
78.5	152.5	78.1597222222222	13.2176532981205	5.6497509505555	2.85695615733285	-1.70713347180892	-1.07715063547179	-1.42240129852270
78.5	153.5	84.5069444444444	13.2035818371069	5.7931265265055	2.98370436250194	-1.73466082629342	-1.09802881733628	-1.36068157267304
78.5	154.5	89.2361111111111	13.2431071862783	5.73928410497974	2.95929531501209	-1.72066109112638	-0.990973503857094	-1.42340414432398
78.5	155.5	94.2430555555556	13.2460918567901	5.68512413695269	2.89719477788305	-1.71195268639572	-1.16798414996626	-1.44501935178621
78.5	161.5	197.673611111111	13.1743354944628	5.46274039780334	2.85695603061899	-1.69220941706086	-1.11240615555879	-2.00339495117929
78.5	163.5	391.083333333333	13.1727012615466	5.57512976449245	2.85339099877693	-1.64586224889340	-0.84011601938098	-1.52593221552882
78.5	164.5	556.395833333333	13.1431997239599	5.47382233336275	2.84703424441548	-1.66314911357894	-0.757385967792673	-1.59301214199459
78.5	165.5	690.180555555556	13.1385018377727	5.38933510926571	2.79082002759832	-1.72946261425550	-0.73805687095823	-1.62416965260198
78.5	166.5	855.277777777778	13.1414527682487	5.31874609193811	2.72573287475155	-1.87941137791374	-0.781731181821949	-1.69860836079025
78.5	167.5	1046.31944444444	13.0775270762856	5.09613658982939	2.70266092387575	-1.98284005662085	-0.84220161356909	-2.16870169945950
78.5	168.5	1208.08333333333	13.0762891500884	4.60878493845109	2.66813720716402	-2.01488653274956	-1.02336231708465	-2.43759642323012
78.5	169.5	1356.40972222222	13.0734907892070	4.65677232254467	2.66256004484354	-2.03431191753767	-1.02312753861395	-2.41462385414161
78.5	170.5	1517.56944444444	13.0726440901539	4.90045061024655	2.68137055054447	-1.98587160010910	-0.969639063323428	-2.43492464273768
78.5	171.5	1661.63194444444	13.0722686167848	4.87965522005898	2.65144140847235	-1.98007166605037	-0.97595736137521	-2.51195071807194
78.5	172.5	1823.15277777778	13.0939919363675	4.92234010820095	2.71159201477835	-1.98097239153059	-0.958342316839053	-2.49763633376892
78.5	173.5	1951.72222222222	13.1136511742151	5.06112772534145	2.71219062957275	-1.9753551758975	-0.801479619762228	-1.92038830602802
78.5	174.5	2010.3125	13.1504111461778	5.35889701851822	2.82994901117556	-1.92465132858279	-0.946648646467687	-2.41569057209256
78.5	175.5	1938.23611111111	13.0846855021105	5.50947831919858	2.80916555814327	-1.92138355280885	-0.946796043998302	-2.44660916899781
78.5	176.5	1858.58333333333	13.1363803543030	5.34054471444433	2.85666598522172	-1.90844035777311	-0.777811412735017	-1.64496883401480
78.5	177.5	1797.63888888889	13.1308861267801	5.25070100698596	2.72813309708508	-1.88559682635206	-0.669354784634106	-1.63076354066862
78.5	178.5	1723.04861111111	13.1098719655106	5.16929844482121	2.7421000026111	-1.91104094377759	-0.665883361808348	-1.65820608592677
78.5	179.5	1595.33333333333	13.0861284539505	4.8535615051863	2.67447612794445	-1.96809449469563	-0.858677370796936	-1.91721480541303
77.5	-179.5	1486.63194444444	13.0943397675568	5.38991017285515	2.90359272319281	-1.91214418862802	-0.761369427081048	-1.82462139992121
77.5	-178.5	1464.94444444444	13.0918406788653	5.35336510477564	2.8941064518242	-1.89929620313969	-0.76134452482499	-1.75611153822590
77.5	-177.5	1242.36805555556	13.0826163474724	5.02096502482391	2.88977787058196	-1.93853046077642	-0.774521822382871	-1.76388303364727
77.5	-176.5	1314.25694444444	13.1004474580550	5.12621660978332	2.92960360483744	-1.94156399177255	-0.814806564932243	-1.7564652563084
77.5	-175.5	1653.375	13.1111010564446	5.12546028643696	2.88565257626025	-1.92712343523830	-0.789759004782502	-1.76912593869337
77.5	-174.5	1961.91666666667	13.1238447023360	5.28193357161938	2.81479398157659	-1.94942315315683	-0.798328951626448	-1.84969429496077
77.5	-173.5	2056.09027777778	13.1248696063726	5.31609907795098	2.77559336413735	-1.93021088529597	-0.802764036992215	-1.87334778581967
77.5	-172.5	2187.47222222222	13.1309486431922	5.41994442925044	2.76083253126048	-1.88110825551287	-0.773429557138102	-1.67803289001681
77.5	-171.5	2230.3125	13.1529358041871	5.30265042517087	2.74810834341320	-1.91723423967486	-0.822298360152312	-2.26453474326295
77.5	-170.5	2196.68055555556	13.1397303653785	5.0247918540963	2.66626509169395	-1.98096301783017	-0.931586827667772	-2.56778090146167
77.5	-169.5	1750.80555555556	13.1419754786972	4.67154757429041	2.66680183282027	-2.01874876972766	-0.972620612750062	-2.50999047826218
77.5	-167.5	489.534722222222	13.1228923451750	4.72450599120199	2.83587373875071	-1.79398829826056	-1.02634308598964	-2.22233948585672
77.5	-166.5	562.916666666667	13.1122625329084	4.75820216671426	2.8931291855469	-1.82467310620533	-1.04008784875681	-2.33983137458906
77.5	-165.5	557.8125	13.1613174510060	4.68980299408944	2.88878777703679	-1.82711378402927	-1.02759041271760	-2.3253145493183
77.5	-157.5	1497.52777777778	13.0369567544698	4.88452022229907	2.86682617173493	-1.99746918230425	-0.825509121386578	-1.86971192603958
77.5	-156.5	1482.40972222222	13.0813545765529	4.69768369124326	2.82774793373352	-2.02387041251232	-1.01017455959701	-2.45255938831451
77.5	-155.5	1302.93055555556	13.0702305559839	4.55672045608436	2.80510114511495	-1.99127534466305	-1.10517863525784	-2.41270287073853
77.5	-154.5	1280.72916666667	13.0338107857248	4.52119197564321	2.69732991829281	-1.97634817486546	-1.00823808720145	-2.59441633671926
77.5	-153.5	2315.92361111111	13.0118634711645	4.50889313300884	2.63035207406459	-1.99164079040239	-1.00365581465475	-2.9417380795774
77.5	-103.5	307.118055555556	13.1787411061392	4.94709652518128	2.82726899583348	-1.77182237535320	-0.917197798938586	-1.66543891702910
77.5	-98.5	197.597222222222	13.2111944633410	5.22167540588501	2.89346399978786	-1.79872115007844	-0.81704842824684	-1.47179649317211
77.5	-97.5	127.388888888889	13.2571347719677	5.56704872528957	3.0371423909488	-1.70960646538392	-0.938624333392079	-1.17939753702129
77.5	-75.5	561.861111111111	13.0834551709243	5.81861574085597	3.00414236091173	-1.59088391275924	-0.651500125921709	-1.40229623619069
77.5	-17.5	130.923611111111	13.0777098591851	5.78248702965827	2.98283743026352	-1.68652812584343	-0.902749938917487	-1.34012506968811
77.5	-16.5	235.402777777778	13.1381817752483	5.69457974992555	3.03145329146566	-1.70271217354972	-0.953280507921867	-1.70465219677056
77.5	-15.5	307.298611111111	13.1610630617568	5.63468420085924	3.0126072133556	-1.60010636717677	-0.772587032568739	-1.68238612873235
77.5	-14.5	318.694444444444	13.1557164102363	5.59890674530729	3.00076338494411	-1.58667819489521	-0.759489965908469	-1.78827094904696
77.5	-13.5	307.881944444444	13.1031424202447	5.44199839212404	2.97082886644124	-1.698099447934	-1.07213124981435	-2.28866458679649
77.5	-12.5	284.388888888889	13.0955562181285	5.355033254361	3.00083312263247	-1.70725984083720	-1.05402645128327	-2.23184434027975
77.5	-11.5	248.798611111111	13.0413667903524	5.40492915248713	2.97905320129244	-1.75634660868509	-1.11578092486660	-2.32134373374125
77.5	-10.5	319.1875	13.0094436935508	5.65751692084914	2.97421222911262	-1.64678040876973	-0.910141410829496	-1.94880731108203
77.5	-9.5	282.444444444444	13.0159747653690	5.69258095019413	2.9761866886647	-1.63067808877051	-0.948026862076667	-1.75923813498465
77.5	-8.5	233.819444444444	13.0153155294717	5.6466325798597	2.93118208024767	-1.66021709971037	-0.933551197342932	-1.94377084804561
77.5	-7.5	247.958333333333	13.0106461187140	5.70944756486091	2.96891992247742	-1.68541829664159	-0.816644869262989	-1.88813149121567
77.5	-6.5	212.659722222222	13.0062142038177	5.69126457582877	2.9535723958906	-1.68195644266952	-0.8513411101126	-2.16779198511203
77.5	-5.5	578.125	13.0440393674724	5.73872130125913	2.98742185426994	-1.61717993216844	-0.643925935479774	-1.79954876521570
77.5	-4.5	1633.65277777778	12.9189830292778	5.68790961140066	2.92872128330643	-1.81506416249425	-0.663242386364797	-1.84137775395959
77.5	-3.5	2520.58333333333	12.9267938220789	5.64585418306056	2.88744570323609	-1.81262732508843	-0.667750100892226	-1.86328660049749
77.5	-2.5	2975.78472222222	13.0128046608136	5.6701453940745	2.8544478566309	-1.86256595369716	-0.623422413418153	-1.9036941267009
77.5	-1.5	3070.61805555556	12.9608808095310	5.65561360080919	2.85074327018409	-1.89090093474610	-0.563516284591355	-1.91204940089798
77.5	-0.5	3124.84027777778	12.8453259261128	5.64429182370046	2.8393018464035	-1.88827875803999	-0.616711299695706	-1.92509214848966
77.5	1.5	3106.54166666667	12.7371818217256	5.69736134755926	2.88381352779577	-1.82523267587959	-0.693835551972265	-1.91826577882614
77.5	2.5	3085.35416666667	12.7422929727972	5.69783353465561	2.86095004359624	-1.82795070108642	-0.712599555837567	-1.92329235483689
77.5	3.5	2871.625	12.7218141675045	5.70596056011072	2.88669334305812	-1.86787765662927	-0.710859128151169	-1.9512779203828
77.5	4.5	2673.13194444444	12.7540219631303	5.7183729350208	2.90317110939568	-1.86889019110730	-0.744673395540343	-1.93998529567672
77.5	5.5	2507.29166666667	12.7452057680967	5.72352435978011	2.91392272738677	-1.84907557044805	-0.786560317144281	-1.93750217386766
77.5	6.5	2115.80555555556	12.702118069108	5.78414656707455	2.92710149205144	-1.79978900949619	-0.781592719415082	-1.91921180471264
77.5	7.5	2962.72916666667	12.6996955015641	5.73675149460581	2.77099784640212	-1.79140298742046	-0.79400828103889	-1.93324499216353
77.5	8.5	2059.68055555556	12.6610511683653	5.8128880283713	2.84218011057425	-1.74254069530358	-0.785562769184497	-1.96060298121902
77.5	9.5	1585.25	12.7433063763524	5.85036806718749	2.83448945272594	-1.66773764868261	-0.770644854336313	-2.06781321056778
77.5	10.5	965.5625	12.7395046172045	5.9624926128124	2.96618327809886	-1.50016942739471	-0.773247905965785	-1.82435566400174
77.5	11.5	382.541666666667	12.7803343017400	5.97454333879278	2.98040332341649	-0.912266523627941	-0.675025405819403	-1.67116328842285
77.5	12.5	166.305555555556	12.7412638793809	5.94192644377626	3.12363739852489	-0.985500637432841	-0.800536220050034	-1.59102417295431
77.5	19.5	112.298611111111	12.9198206422637	5.74044292454516	3.06522015295663	-1.66942052026508	-0.923331760920172	-1.55887517318676
77.5	20.5	67.2083333333333	12.8268845523909	5.76135690537052	3.03753942907911	-1.59462651727793	-0.856826720862049	-1.50536337296751
77.5	27.5	162.638888888889	12.9571358411184	5.64579725604802	3.00284816873517	-1.64682644241435	-1.22702830624867	-2.00237554382941
77.5	28.5	196.923611111111	13.0309539950624	5.62536660563885	3.00405908199839	-1.67209888218245	-1.21835262485416	-2.22957915413155
77.5	29.5	216.1875	13.0588969283979	5.66751221584051	3.01415288280606	-1.65805767182998	-1.17194919175924	-2.17577581539665
77.5	30.5	213.645833333333	13.0796844864744	5.7174466317731	2.99967956187028	-1.65094838396404	-1.20263535849098	-2.10282845844293
77.5	31.5	187.701388888889	13.0651614227763	5.63563305425801	2.99877358307101	-1.63800513662464	-1.19190017552916	-2.10504369059948
77.5	32.5	157.152777777778	13.0650087226238	5.63192277840482	2.9944898835568	-1.64596132858363	-1.17621207520665	-1.97160104801035
77.5	33.5	161.833333333333	13.0552312684482	5.6589392423604	3.03503962502153	-1.64997050084735	-1.17185644345135	-1.98241828593828
77.5	34.5	169.097222222222	13.0032558619714	5.63708529346772	2.99289826532304	-1.67468172794774	-1.17379432555154	-2.04779862894492
77.5	35.5	157.631944444444	12.9906446490522	5.63739243559167	2.99268438978192	-1.64435063409613	-1.17575294000805	-1.94653167958478
77.5	36.5	165.104166666667	12.9881286971677	5.65530023404969	2.99254135074246	-1.69265623943498	-1.16956525715114	-1.98394447246124
77.5	37.5	192.166666666667	13.0052653499180	5.65163681121149	3.00812369311466	-1.67663922893038	-1.15196347248184	-2.24629969086037
77.5	38.5	213.652777777778	12.9852130192817	5.62209407714958	2.99444070373510	-1.66823119423869	-1.16632638725127	-2.26317215822198
77.5	39.5	211.902777777778	12.9945424179430	5.54321528516491	2.9929585328481	-1.76054963335739	-1.14392957483813	-2.28594423638679
77.5	40.5	205.826388888889	13.0406319843799	5.56434881560593	2.99272241713060	-1.75286905678247	-1.15339986772934	-2.26240878735149
77.5	41.5	229.430555555556	13.0376128404749	5.55410856743263	3.00095935880959	-1.77275530026226	-1.14480066180004	-2.33759475389061
77.5	42.5	241.923611111111	13.0319197983514	5.48674407517596	2.99702603489798	-1.78433694380538	-1.13650142601022	-2.36061111175172
77.5	43.5	262.090277777778	13.0277560186864	5.3553185941588	2.98131940551453	-1.78590306021451	-1.13898511197149	-2.39179677931554
77.5	44.5	287.756944444444	13.0204537451544	5.31164021091891	2.97668528244702	-1.74777217174703	-1.11293048185881	-2.33527760772817
77.5	45.5	252.090277777778	13.0353473894738	5.34002385491304	2.97632269359501	-1.77025803218448	-1.16719746976795	-2.35549326812519
77.5	46.5	245.041666666667	13.0788714990611	5.43696164107978	2.99379426825685	-1.75758866735234	-1.16435382764629	-2.36823970408125
77.5	47.5	250.972222222222	13.1068381610000	5.47367401239855	2.99357249162055	-1.75417744878718	-1.15091634000008	-2.40066090243101
77.5	48.5	286.361111111111	13.1635795350781	5.58352682994187	3.00863741499716	-1.6629916011534	-1.12989031093952	-2.33758882440176
77.5	49.5	311.152777777778	13.1706590985441	5.56636478597649	3.01142586430216	-1.65640544679711	-1.10880562935573	-2.30094568569787
77.5	50.5	292.118055555556	13.1185954082056	5.53471451351315	2.98735704381975	-1.65776623451784	-1.11385998377071	-2.27967868055465
77.5	51.5	297.729166666667	13.1142622135568	5.32659491923492	2.97943255875213	-1.73803330750087	-1.13251302144225	-2.34623490197276
77.5	52.5	300.486111111111	13.111873336636	5.39279627330808	2.97874464844155	-1.73848802503289	-1.13769162451412	-2.34229588760805
77.5	53.5	296.388888888889	13.1100033574492	5.43565964511065	2.9877115657232	-1.72802853015650	-1.13179350677944	-2.25397441120252
77.5	54.5	264.152777777778	13.1137647027793	5.47029709098452	2.99226138542216	-1.66976229105455	-1.13457089345373	-2.23676046654277
77.5	55.5	231.965277777778	13.1179029729234	5.49001475288676	2.98981085031058	-1.69689048804641	-1.08246947950138	-2.25714893131785
77.5	56.5	195.319444444444	13.1485518955739	5.52969331570106	3.00950389711251	-1.70750441109245	-1.16202098169669	-2.27076269778979
77.5	57.5	179.930555555556	13.1479600109801	5.54622346871975	3.03282706393424	-1.67485191776136	-1.13801439943132	-2.19581127993545
77.5	58.5	214.3125	13.1228045329011	5.51115537019334	3.01262863108671	-1.68693569859182	-1.13993050419627	-2.24078761701522
77.5	59.5	279.076388888889	13.1489757351224	5.59957125992526	3.01957641102982	-1.67130303397914	-1.14346343988006	-2.26865527478628
77.5	60.5	283.763888888889	13.1310603541113	5.61501056107839	3.02238476962478	-1.65244224838849	-1.06818859399201	-2.17573205484793
77.5	61.5	266.930555555556	13.1223215259929	5.60711646827139	3.04561355779553	-1.69067201816739	-1.06522462813338	-2.21547656589279
77.5	62.5	225.902777777778	13.1407680795045	5.61189082628631	3.04772970163326	-1.69284958969583	-1.04409369549484	-2.18565566077924
77.5	63.5	199.222222222222	13.1629933200668	5.54853401914974	3.05296797423378	-1.74529977062212	-1.06103183330843	-2.13476195191261
77.5	64.5	213.173611111111	13.1996166933650	5.56461694282117	3.05293475987386	-1.78508175055868	-1.05320027637810	-2.17768996626574
77.5	65.5	231.027777777778	13.1805010300251	5.6030171738779	3.02374924950128	-1.79157894683129	-1.02590850503508	-2.16381785340406
77.5	66.5	262.180555555556	13.1601322654406	5.60464437215492	3.04138362480333	-1.75713329584813	-0.890702236327535	-2.07737971628120
77.5	67.5	301.361111111111	13.1505831539178	5.68700544691984	3.07630479713618	-1.63571753809221	-0.8726531567267	-1.69008892115159
77.5	68.5	409.104166666667	13.1616145500914	5.69078596654499	3.07824276794170	-1.59597692543295	-0.743487403295593	-1.69895234459800
77.5	69.5	388.979166666667	13.1989829352722	5.74812162795387	3.04895050034473	-1.60629780032631	-0.679663978658761	-1.53674404704513
77.5	70.5	344.368055555556	13.1958937423049	5.74623335788401	3.08255996878073	-1.63483808919875	-0.850693925719162	-1.69449892939703
77.5	71.5	284.388888888889	13.2442416791396	5.75741894618778	3.08167172169811	-1.67548502056613	-0.89331986935258	-1.68379271468728
77.5	72.5	267.875	13.2596292298969	5.77297388817828	3.07368482973121	-1.68374275506521	-0.980424263206267	-1.87746760246555
77.5	73.5	253.604166666667	13.2362304172438	5.79351530495715	3.08005977636421	-1.68338245826366	-1.15024322866153	-1.95139529297896
77.5	74.5	254.5625	13.2443807573157	5.82582071826436	3.03334007866700	-1.70915476488492	-1.1248517693022	-1.99104010967675
77.5	75.5	243.430555555556	13.2616283619921	5.83301243774898	3.03722613006903	-1.69467047858217	-1.14783975505565	-1.88858726241335
77.5	76.5	231.277777777778	13.2271032584480	5.76442248080672	3.03563133908525	-1.69139099045559	-1.12760304151218	-1.85107976185356
77.5	77.5	182.638888888889	13.2293882018846	5.76915975260569	3.05594146482302	-1.7442501398678	-1.19430459704910	-1.91194431179537
77.5	78.5	116.923611111111	13.2735869778453	5.75989389864403	3.03741003223979	-1.70146955397134	-1.15684852983878	-1.62698942729352
77.5	79.5	78.7222222222222	13.2927334157046	5.78401824093957	3.07912512542829	-1.67536097902115	-1.20234791732391	-1.54514271694036
77.5	80.5	65.5208333333333	13.2987691281181	5.79620169858833	3.07001093156123	-1.65399146870117	-1.19484493869488	-1.61012197101065
77.5	81.5	59.8541666666667	13.3228756874815	5.81334001590869	3.05390824822984	-1.67485147574402	-1.22257819054928	-1.63293251615561
77.5	82.5	68.6319444444444	13.3209898399924	5.84162390140867	3.05002798667988	-1.67105717683579	-1.21193496278559	-1.60525390570297
77.5	83.5	73.4652777777778	13.3259327417778	5.80233945719527	3.04994414420990	-1.63723346826457	-1.24361582494009	-1.54328928356312
77.5	84.5	62.3055555555556	13.3155697315322	5.77579584142216	3.07075486667716	-1.61276364088079	-1.23002026864674	-1.58484401982629
77.5	85.5	74.2291666666667	13.3133237659976	5.77324678385814	3.03928147446901	-1.65945447372875	-1.19043199069839	-1.55036284932363
77.5	86.5	78.2777777777778	13.3598793310838	5.78355296727463	3.04574564933598	-1.70199341671747	-1.10463092013314	-1.6061808940145
77.5	87.5	70.1666666666667	13.3064386435266	5.78055095765106	3.05544431466218	-1.64658373890545	-1.12292433555753	-1.54023156761088
77.5	88.5	39.4097222222222	13.3018137475160	5.796915664178	3.07363930954177	-1.6427395809764	-1.04493623788675	-1.57161606593295
77.5	89.5	31.0833333333333	13.2891618473683	5.80422895364851	3.08483902300582	-1.59646031319598	-0.891691957305558	-1.09625857192448
77.5	90.5	27.0347222222222	13.3282607542853	5.80428824455539	3.05614428154631	-1.60124494847283	-0.701792751923813	-1.03890927961677
77.5	91.5	29.7986111111111	13.2911130959359	5.80423591651194	3.06632841903318	-1.61969428688281	-0.705169424812574	-1.03509429069329
77.5	92.5	47.8125	13.3126596654073	5.86531590966247	3.02706153950065	-1.67244558280291	-0.871066119648605	-1.05036853819801
77.5	93.5	63.3402777777778	13.3953750062295	5.72781166406523	3.02762818405055	-1.63692071367935	-0.716281162121524	-1.08150341355460
77.5	94.5	72.0555555555556	13.4068261020732	5.72898993701118	3.07005406177162	-1.61404406967710	-0.722083274085457	-1.08020634980408
77.5	95.5	63.0486111111111	13.3359322239267	5.71937659834109	3.06743748715732	-1.61621304066834	-0.665448638670924	-1.08547640094844
77.5	96.5	70.4722222222222	13.3160366654997	5.76280262257341	3.08754798024130	-1.59211833760118	-0.708434556937645	-1.07638814931294
77.5	97.5	90.7847222222222	13.3181789425180	5.80170688729033	3.11120338099412	-1.61150629028813	-0.793291204020847	-1.08415865273559
77.5	98.5	109.493055555556	13.2844162575390	5.8409128656651	3.07589048655226	-1.65331985741377	-0.801286543380263	-1.03085737304762
77.5	106.5	69.3055555555556	13.4254096931647	5.8061046755977	3.10946478490179	-1.63345091984282	-0.744934671143171	-0.981771265683733
77.5	107.5	85.8888888888889	13.4599635525554	5.79326006037002	3.14846886925138	-1.65482275537551	-0.759852713943805	-0.990440890442767
77.5	108.5	123.972222222222	13.3530293660414	5.80066417358818	3.19000742382763	-1.68675272379188	-0.914218220975369	-1.08603040455597
77.5	109.5	142.1875	13.3023116222630	5.70608917730856	3.19946650479312	-1.65836101671000	-0.945557626460977	-1.08467372749114
77.5	110.5	143.708333333333	13.3357010231926	5.81615659427143	3.19186233334555	-1.69945837341053	-1.00121135503931	-1.09534284855912
77.5	111.5	135.229166666667	13.3532765495999	5.79405398017591	3.19369575089488	-1.65856773512695	-0.925035873905568	-1.06303950614027
77.5	112.5	102.930555555556	13.3610068682681	5.74913119569526	3.12198683693911	-1.66405641022764	-0.893718966677966	-1.06474315022710
77.5	113.5	102.111111111111	13.2722984803419	5.75264203632594	3.09265219400151	-1.64618049097915	-0.956732907506975	-1.11280569210722
77.5	114.5	90.4930555555556	13.3959490859262	5.7671840381999	3.06864070827187	-1.65132284202872	-1.08504207927276	-1.37346026428260
77.5	115.5	138.645833333333	13.3641823253486	5.76738735530815	3.06145792038275	-1.64996703733851	-1.13855689739358	-1.44692880410011
77.5	116.5	256.8125	13.2498980940491	5.58987635546782	3.03183062868088	-1.63331524232682	-1.17259548105940	-1.67654004600018
77.5	117.5	484.416666666667	13.2145696408502	5.58674526219657	3.02014345833528	-1.5904090681341	-0.999202296112768	-1.72050030459852
77.5	118.5	708.465277777778	13.2222411668699	5.59131418748169	3.02245087137606	-1.65430976621205	-1.09378530232272	-1.85518890735076
77.5	119.5	781.722222222222	13.2133731515542	5.53876908957991	2.97792874893715	-1.73316210986912	-1.02699930947380	-1.85159123188195
77.5	120.5	800.180555555556	13.2021166554278	5.59045894402927	2.97519368557376	-1.7521643789396	-1.00224832215786	-1.96962144988778
77.5	121.5	922.222222222222	13.2197593363229	5.61623980725298	2.98577933091488	-1.76413144484826	-0.978731202386356	-1.79407346008529
77.5	122.5	1155.61111111111	13.2105844871847	5.61485564926816	2.95394766983351	-1.74999771378408	-1.00484523353058	-1.75804029416325
77.5	123.5	1233.97222222222	13.1956345001195	5.62673788730056	2.96727498511966	-1.74948547928445	-0.997345467703373	-1.74684035932219
77.5	124.5	1281.375	13.1734907021472	5.57164954238994	2.92616207335295	-1.77623298461579	-0.978158570111481	-1.82999098516476
77.5	125.5	1358.48611111111	13.1524405175276	5.57643923023258	2.92334216738919	-1.75604914386440	-0.981857414284713	-1.79794983364464
77.5	126.5	1256.83333333333	13.0935267586143	5.64743873892742	2.94101953055057	-1.74747014918215	-0.995099531274428	-1.79960870617593
77.5	127.5	859.256944444444	13.1417689793542	5.64126789410429	2.94209605982659	-1.77329440926660	-0.964996666765965	-1.84329172580561
77.5	128.5	802.159722222222	13.0809232647048	5.66788772702051	3.00027052116669	-1.74391402800367	-0.996233267051468	-1.90669957269066
77.5	129.5	421.1875	13.1270970641109	5.70094788900665	3.02762060713551	-1.59683444007185	-0.994846810259531	-1.81511849016706
77.5	130.5	163.715277777778	13.2431463817447	5.74724819573719	3.06398935733667	-1.67856231055249	-1.12384192413099	-1.52722006827988
77.5	131.5	95.8680555555556	13.3497124096723	5.74061586227469	2.95052328185143	-1.69280065169174	-1.08864000521360	-1.42451454215809
77.5	132.5	68.2777777777778	13.3309689105998	5.73197277137372	3.03388928665093	-1.68436387257812	-1.10591675280898	-1.42032366409332
77.5	133.5	61.2291666666667	13.31929756795	5.78602230110847	3.03745536058052	-1.68599130938827	-1.05660029792316	-1.38004168933013
77.5	134.5	55.75	13.3718729096353	5.8420563792423	3.00733556092458	-1.64311170597123	-0.953905899431912	-1.01848447689767
77.5	135.5	52.8888888888889	13.3646586990499	5.81090308631008	3.00250262591359	-1.64258418520178	-0.888496867564375	-1.00658794547407
77.5	136.5	48.5347222222222	13.3188836955415	5.71654822463852	3.02911502229476	-1.67780931750256	-0.803533118858276	-1.14902118889290
77.5	137.5	44.875	13.3976000351339	5.76719882738891	3.06187255464207	-1.66251978126628	-0.819152849115688	-1.08053018286383
77.5	138.5	42.2638888888889	13.3775077855367	5.7701163134638	3.08206405947590	-1.66716453106733	-0.876044338502628	-0.996427500552274
77.5	139.5	40.4375	13.4174082046283	5.75180656910835	3.08011733775807	-1.69535108440808	-0.86818663025218	-0.979907061703138
77.5	140.5	39.2777777777778	13.4269372262116	5.75378079641032	3.07177302954253	-1.68721241253139	-0.889516005276573	-0.976462049308476
77.5	141.5	37.8958333333333	13.4148359889955	5.75488885956705	3.03035245327257	-1.69772783556898	-0.866517797566517	-1.0077532806531
77.5	142.5	38.2777777777778	13.3887377474387	5.71572665721154	3.03608583770667	-1.65657007063057	-0.905769114977333	-1.06809769911596
77.5	143.5	39	13.3752614812057	5.72412319071267	3.00347975376648	-1.66128155284133	-0.964000687548356	-1.07804210045442
77.5	144.5	39.5	13.3574748560260	5.71688763257260	3.00559224035288	-1.66820280786339	-1.08097437137314	-1.39896399129929
77.5	145.5	39.6041666666667	13.3490328651761	5.75885870448704	3.01054955988053	-1.66999676325460	-1.0051964048211	-1.15867081986707
77.5	146.5	41.0625	13.2906207690833	5.73041113723529	3.00811648432732	-1.67360786872414	-0.95497803441155	-1.08122666594978
77.5	147.5	43.1944444444444	13.2776382530751	5.70630209063584	2.97171261903394	-1.68364017612684	-0.965875024806734	-1.08505479223197
77.5	148.5	45.6458333333333	13.269209683672	5.65327082968068	2.94098866044854	-1.67438717337097	-1.00527972732033	-1.23807124323478
77.5	149.5	48.0486111111111	13.2658819052091	5.67071294636147	2.93856749229241	-1.67427615813106	-1.15855747397671	-1.45782469440503
77.5	150.5	50.4861111111111	13.2483407624642	5.5291818681001	2.94236055248329	-1.67959778226566	-1.17543650906504	-1.51235588951545
77.5	151.5	53.6875	13.2109628768892	5.38389003443546	2.84807273756725	-1.7052028159298	-1.16763650863735	-1.63169560618578
77.5	152.5	60.2013888888889	13.2477504420576	5.43282746719797	2.93776657715463	-1.73471680463513	-1.21582591146898	-1.64514726150942
77.5	153.5	63.8958333333333	13.1958150949208	5.1800991683435	2.84267287562012	-1.74307260652790	-1.21766349545087	-1.69383166327630
77.5	154.5	66.1805555555556	13.2134730873489	5.31556726106925	2.85296125789398	-1.72794086391653	-1.18750148809919	-1.70886847140853
77.5	155.5	65.3472222222222	13.2241295646635	5.32115463404417	2.86905334765197	-1.68189831288932	-1.13606483091322	-1.64478151239505
77.5	156.5	63.3958333333333	13.2417439538977	5.28339848892655	2.81913815866781	-1.69688313010746	-1.11362412983695	-1.59181071392521
77.5	157.5	73.2847222222222	13.1748787908848	5.02736644562269	2.75727276977313	-1.74344341314671	-1.14158484092417	-1.72095693283836
77.5	158.5	83.0347222222222	13.1370567141749	4.91155078376216	2.77758590103025	-1.79457623417869	-1.15263409436006	-1.83134795762026
77.5	159.5	90.0069444444444	13.1465358968544	5.01962034480819	2.81312205441481	-1.79887461014848	-1.13715478713177	-1.82836537899596
77.5	160.5	97.2916666666667	13.1558341059604	5.0041594098502	2.76919068148133	-1.80807629073860	-1.15960106719397	-1.84884667381027
77.5	161.5	112.625	13.1810861357694	5.21821315141969	2.83919642538131	-1.73715472576556	-1.15891422490084	-1.85067841174788
77.5	162.5	136.625	13.1341294478151	5.22412580378616	2.84647443639844	-1.73950875058837	-1.14500545633264	-1.85682211664003
77.5	163.5	162.777777777778	13.1132331482762	5.15046213684811	2.80651160808001	-1.83772068891389	-1.18167996340799	-1.85481808492918
77.5	164.5	185.4375	13.0895529112428	5.16774636866093	2.79423125621535	-1.79716227126430	-1.11759116704600	-2.16395882375118
77.5	165.5	211.875	13.0733506956517	5.14000710772914	2.90896627224396	-1.79771324396763	-1.09785510109529	-2.14683612870621
77.5	166.5	241.625	13.0993026537729	5.29907503662912	2.92462211111165	-1.81815511972206	-1.10535744598251	-2.14786939217362
77.5	167.5	278.159722222222	13.1418451054077	5.27559694701409	2.93144159210239	-1.80236364525414	-1.10476133306412	-2.10495490613066
77.5	168.5	322.423611111111	13.1393775764290	5.40508907914872	2.95566623760038	-1.73145051074298	-0.94290546355259	-1.57576172439642
77.5	169.5	372.027777777778	13.1366557372615	5.36721390510187	2.96171433517485	-1.70825085188337	-0.792373015583655	-1.61147974729264
77.5	170.5	507.340277777778	13.1486886063373	5.27765574245414	2.94763219169220	-1.69149148523352	-0.806226761590782	-1.64794029719033
77.5	171.5	685.013888888889	13.1544023221115	5.31052377739028	3.02704336336603	-1.76957481647899	-0.816451357141749	-1.66765914219206
77.5	172.5	849.909722222222	13.1482639912848	5.29184985313666	2.90741640297238	-1.92514876263685	-0.718802326319465	-1.64052398038303
77.5	173.5	996.194444444444	13.1847178054478	5.40799769506975	2.92539617597736	-1.89170980309293	-0.771662708947204	-1.61831813645089
77.5	174.5	1176.95833333333	13.1265931922968	5.43904497217165	2.99363917110905	-1.90733831728413	-0.79822516852094	-1.72849893859440
77.5	175.5	1271.97916666667	13.1250527571217	5.40526141561148	2.96537561404784	-1.92780957901954	-0.811852660912505	-1.76330839029780
77.5	176.5	1270.27083333333	13.1021265401777	5.47585073380225	2.94749742898488	-1.89653633301608	-0.79000302882579	-1.74299874583297
77.5	177.5	1246.64583333333	13.1097674851655	5.53642702562751	2.93745661225273	-1.87572977413306	-0.79803017557315	-1.74660620885351
77.5	178.5	1341.32638888889	13.0854609327582	5.51599510975384	2.92225732699091	-1.88021622502881	-0.788337337316037	-1.76697053791697
77.5	179.5	1432.46527777778	13.0920384962248	5.39038192192031	2.91230884783256	-1.92706581413857	-0.779052744587736	-1.84532227326431
76.5	-179.5	1106.72916666667	13.0637119138595	5.61793085958797	2.99359628853497	-1.88630212163564	-0.803523119883883	-1.70929181684699
76.5	-178.5	954.881944444444	13.1106956222363	5.44247698850952	2.99106197705851	-1.89311488317534	-0.7746038985931	-1.74865374613188
76.5	-177.5	1184.22916666667	13.1183075635340	5.31568905076281	2.92585648577733	-1.92799517657778	-0.784100631139359	-1.79349733075528
76.5	-176.5	1685.625	13.1136549743497	5.23847683649699	2.82469842275770	-1.92404227939129	-0.953821296711338	-2.37041560193888
76.5	-175.5	1971.77777777778	13.1098751769658	5.24207174439181	2.7934070371538	-1.94618095680869	-0.946235322689525	-2.41576018349604
76.5	-174.5	2111.64583333333	13.0747694051591	4.95206259693393	2.7227932955677	-2.00963466030676	-0.963581583925186	-2.64407162088421
76.5	-173.5	2171.13888888889	13.0771410152855	4.9139150979071	2.69399620515022	-2.00876668155651	-0.972332710827793	-2.7601900981107
76.5	-172.5	2155.83333333333	13.0786091008212	4.72382387813079	2.67254338517168	-2.02591809469956	-0.97535921492378	-2.81590679212928
76.5	-171.5	2124.06944444444	13.0526686547214	4.69273263892755	2.75597122951817	-2.01376731988077	-0.98644859504829	-2.78030207453557
76.5	-170.5	2072.70833333333	13.0870780129142	4.73735382912607	2.76097191768052	-2.02407654030383	-1.00410056731727	-2.85887615329198
76.5	-169.5	1991.95138888889	13.0795369508217	4.49141415462951	2.61806443933274	-2.00843081595265	-1.02903863678695	-2.93850517248454
76.5	-168.5	1631.35416666667	13.0618143216186	4.5159327032784	2.49159286092825	-2.03540230701043	-1.03702361773215	-2.54083533546763
76.5	-167.5	778.638888888889	13.0305765280396	4.56413474575438	2.48669793888289	-1.97917601846356	-1.04053039088459	-2.38307936054402
76.5	-166.5	552.034722222222	13.1095782554810	5.01958253040696	2.93379862076309	-1.76489550391204	-1.00753365682806	-2.28036529511961
76.5	-165.5	806.979166666667	13.1336646812976	4.96946058355394	2.89043526338224	-1.98595555334794	-1.00235767856958	-2.28878240752858
76.5	-164.5	592.506944444444	13.1002951556383	4.91961462595993	2.86120200730287	-1.79818996238003	-1.02053226167815	-2.2150000180178
76.5	-163.5	1059.33333333333	13.0580865235687	5.05121508674111	2.71343741234731	-1.97194975891030	-0.993279520887517	-2.36732846061788
76.5	-162.5	1610.56944444444	13.0701709774599	5.07873597008696	2.64953752779618	-2.01682586883834	-0.968769310885946	-2.36243416182664
76.5	-161.5	1426.69444444444	13.1591411264024	5.10651001149441	2.78247215720166	-2.00047501434097	-0.95165712360786	-2.22388302157172
76.5	-160.5	1953.09027777778	13.0959938875010	5.12018367437779	2.7869025983093	-1.95716920897706	-0.759660762781196	-1.69871117130662
76.5	-159.5	1786.77777777778	13.09802492412	5.08753597319579	2.7974541833761	-1.95210494413825	-0.730076068351297	-1.73249030030215
76.5	-158.5	1026.39583333333	13.1281895441486	5.04843619420554	2.84678991362324	-2.02206851167884	-0.863094141321421	-1.83031082908927
76.5	-157.5	1084.77777777778	13.1075491496646	4.82214252886821	2.80137751525211	-2.04352483730226	-1.02164129749504	-2.38973239594944
76.5	-156.5	1080.08333333333	13.0934755466907	4.62609538220532	2.74807617667029	-2.01571063197144	-1.04896810761887	-2.41915515143310
76.5	-155.5	1427.44444444444	13.0386811333612	4.57551124857239	2.82648168957960	-2.04979247181030	-1.09544697112833	-2.61760856824298
76.5	-154.5	2762.90972222222	13.0665537131352	4.54031699707281	2.62365470004345	-2.02934460364482	-1.04263610744159	-3.02988876512855
76.5	-153.5	3707.28472222222	13.0582785684384	4.50702553156504	2.49888957013575	-2.01889384521364	-1.12739453053484	-3.07010415701818
76.5	-152.5	3741.81944444444	13.0142437922684	4.53909058440656	2.34703867306741	-2.00839742899270	-1.13686466972034	-3.05034478169213
76.5	-148.5	3760.91666666667	13.0105123354529	4.46560222575961	2.34819308524958	-1.98807888637854	-1.13282585369830	-3.06617537854039
76.5	-124.5	282.902777777778	13.2035032203966	5.28454784916026	2.96570766259000	-1.78410908006659	-0.953830612886698	-1.55893063040896
76.5	-106.5	189.048611111111	13.1501907087655	5.289628884571	2.90679201751753	-1.78640304837018	-0.94436110391233	-1.49584635414874
76.5	-105.5	169.770833333333	13.1816311317960	5.07112647111531	2.89358715498073	-1.78640634441714	-0.956893636379062	-1.50111659855098
76.5	-77.5	213.152777777778	13.1348094733656	5.69957252325274	3.0483337805186	-1.7203152302954	-0.741588674974707	-1.35882634104597
76.5	-76.5	194.909722222222	13.0671672527588	5.81597351227659	3.07663169004574	-1.72288593479101	-0.831187653512338	-1.34876840338863
76.5	-75.5	355.618055555556	13.1239965583861	5.83312132794909	3.06704440824538	-1.67209558057750	-0.77576176209479	-1.39143339323049
76.5	-74.5	487.770833333333	13.0684101739391	5.80055098137374	3.01746517346714	-1.59543635430146	-0.66898797857085	-1.3993614409121
76.5	-73.5	439.930555555556	13.1028731652452	5.8059084200946	3.02273112103615	-1.62118263435260	-0.687955646636405	-1.35579943461206
76.5	-72.5	421.298611111111	13.0710867190219	5.79089385797168	3.03525542556537	-1.5864477636561	-0.707754959031348	-1.35488361908878
76.5	-17.5	199.541666666667	13.1234927169740	5.80086908332883	3.00881834896896	-1.70556868274234	-1.00807745002958	-1.67079172955519
76.5	-16.5	221.618055555556	13.1044073076079	5.77626865155022	3.01566620962325	-1.68899171342390	-1.05441642597707	-1.86226984924092
76.5	-15.5	232.590277777778	13.0957121213871	5.64037593911711	2.97555754298128	-1.65109782762093	-0.990163019061352	-1.85857625827719
76.5	-14.5	246.020833333333	13.1176571612920	5.55210891465806	2.99130579707703	-1.64802190752485	-1.10498908160625	-2.19941190210873
76.5	-13.5	221.791666666667	13.1204224954450	5.48718347049124	2.98289173931754	-1.7532620737651	-1.12174756340582	-2.24302868290165
76.5	-12.5	231.069444444444	13.0966058008112	5.52040523629363	2.98501078222316	-1.70283600419895	-1.13821474529411	-2.10932930272574
76.5	-11.5	279.180555555556	13.0545161286905	5.65869073617545	2.98667248198572	-1.61303999933989	-0.948062754813954	-1.78844776647896
76.5	-10.5	313.895833333333	13.0086469809942	5.62594979561247	2.96657870436320	-1.62580737150176	-0.90276943196572	-1.77908815326467
76.5	-9.5	300.173611111111	13.0648134916673	5.69452731103924	2.94792786671471	-1.64090356487802	-0.86502392930415	-1.91599481082038
76.5	-8.5	473.590277777778	12.9656528658870	5.70682524477027	2.92745611948566	-1.60560646880611	-0.697959875383525	-1.89953043381119
76.5	-7.5	781.326388888889	13.0169480154296	5.6914140561034	2.88078243065486	-1.79248636812021	-0.681240668566601	-1.84069089730480
76.5	-6.5	1554.00694444444	12.9934863921219	5.68374671712983	2.86790023578678	-1.88511818464005	-0.680645938992668	-1.84689704494443
76.5	-5.5	2117.14583333333	13.0599474810498	5.71832915336723	2.90903714993029	-1.80530995415706	-0.620599812524811	-1.82498046457327
76.5	-4.5	2533.19444444444	13.1206187453061	5.72974594380159	2.88801277399507	-1.77092727166313	-0.554485242245223	-1.81817738465538
76.5	-3.5	3012.40972222222	13.1372712571876	5.71876186912593	2.81520551814604	-1.83103345278382	-0.561778131583119	-1.87834561496800
76.5	-2.5	3220.11805555556	13.0937694853620	5.66546184923052	2.87415717359467	-1.86702280693875	-0.57378732843686	-1.88989155921142
76.5	-1.5	2968.16666666667	13.0713805527691	5.67084919756245	2.89794034453116	-1.84107502059116	-0.523585178042169	-1.95155216098310
76.5	-0.5	2885.78472222222	13.0583205741413	5.69434855957205	2.88197531910124	-1.88313731513185	-0.546707119669442	-1.88647412669636
76.5	1.5	3168.17361111111	12.9861937347523	5.6948517074984	2.77759845492946	-1.85017329258193	-0.692726022033348	-1.86762252005639
76.5	2.5	3159.44444444444	12.9698382008228	5.65988229790185	2.78593569545496	-1.85047371474529	-0.701094634233635	-1.95719468826165
76.5	3.5	3049.625	12.9211813144115	5.6344965511158	2.78941980507836	-1.90742284193946	-0.732799897823597	-2.10349867065393
76.5	4.5	2889.69444444444	12.9642934459686	5.62700135262349	2.83223447605288	-1.90428478390029	-0.75740497815343	-2.51575675035605
76.5	5.5	2463.81944444444	12.9521076443645	5.67852861641022	2.84011100756910	-1.88605524332864	-0.785043381458398	-2.47375654086845
76.5	6.5	2315.42361111111	12.9267332223267	5.73571557292047	2.82754809363677	-1.84789574192234	-0.809588173827669	-2.31193194911879
76.5	7.5	2633.96527777778	12.9170143768032	5.73092495819598	2.73062650084418	-1.82152195453573	-0.7848051542104	-1.98607580322678
76.5	8.5	2147.66666666667	12.9131759028579	5.77878188001586	2.77139554915916	-1.80706883551027	-0.777448830856264	-1.91464581386111
76.5	9.5	2220.70833333333	12.8929212691654	5.75542837054756	2.71493769158719	-1.79760503154573	-0.818998044816487	-2.17846532359011
76.5	10.5	2077.875	12.8717688547495	5.75396933639211	2.76821657957124	-1.75388222511222	-0.830061682861441	-2.20343068082335
76.5	11.5	1797.85416666667	12.8459255486479	5.8159239663829	2.80780329100374	-1.51407923150253	-0.650028685730957	-1.97968322985119
76.5	12.5	1351.95138888889	12.8055851038333	5.85813493590159	2.89212489310503	-1.19254430673388	-0.622725080119455	-2.03292135600830
76.5	13.5	791.861111111111	12.7519447476729	5.85833277028802	2.8878266612476	-1.00091247630241	-0.588625617397512	-1.86074391818886
76.5	14.5	327.881944444444	12.6656422962844	5.9818665327994	3.04013627022067	-1.35845707227530	-0.768944594493798	-1.78579619749260
76.5	15.5	150.625	12.7263323872024	5.96495733198792	3.09406795383167	-1.60454647615474	-0.943451820936207	-1.55179560671963
76.5	17.5	161.5625	12.7369130300338	5.79920578016514	3.00275033474587	-1.62157007818606	-1.12897142515187	-1.52428473931282
76.5	18.5	172.291666666667	12.7732499194893	5.80886122822001	3.10860256811827	-1.67456199512414	-1.21049772496145	-1.83086975221809
76.5	19.5	169.854166666667	12.8230850154921	5.75009276794126	3.09211906902398	-1.66281608381158	-1.20279490546741	-1.80256789248568
76.5	20.5	151.097222222222	12.8078982091346	5.80049338938713	3.10377179369674	-1.62878799314953	-1.10797931075974	-1.62343522027473
76.5	21.5	125.125	12.8264135333939	5.85925857358776	3.06072147541073	-1.62474534959801	-1.04669505844060	-1.56869296941348
76.5	22.5	124.319444444444	12.9017749869999	5.78516317444611	3.07994724693195	-1.61560389213774	-0.997294017721406	-1.58245519663461
76.5	23.5	82.7083333333333	12.9504025340960	5.80330882901644	3.04946782997132	-1.61640058670077	-0.98637843884992	-1.50797567492274
76.5	26.5	112.402777777778	12.9255667195376	5.78692885931947	3.00358262550298	-1.64078800167572	-1.06989516474311	-1.56639407733822
76.5	27.5	143.416666666667	12.8552307912974	5.7836395943202	3.0472079335658	-1.67308938824662	-1.01609557142275	-1.59719175639208
76.5	28.5	166.243055555556	12.8326970465180	5.7693773331349	3.04120655086231	-1.67065122408797	-0.907848169936091	-1.57347914137572
76.5	29.5	248.090277777778	12.8606057846574	5.75795244851141	3.06991777259945	-1.68307155147094	-0.896462470902452	-1.77054498919979
76.5	30.5	274.840277777778	12.8494525896432	5.76146530935985	3.07868117205451	-1.67545454512083	-0.88358406166164	-1.79459323105309
76.5	31.5	277.118055555556	12.8582623825887	5.75776074868036	3.07131411587154	-1.69683006483153	-0.90601797623847	-1.8261310289327
76.5	32.5	252.104166666667	12.8865068628874	5.70621198914699	3.06783958889247	-1.67016700170308	-0.8989342589859	-1.7907324241561
76.5	33.5	217.486111111111	12.8923545399552	5.72134215521426	3.02997734628463	-1.69817198491397	-0.927664186176262	-1.79620211247643
76.5	34.5	215.659722222222	12.8653513303976	5.69977011660794	3.01767334767107	-1.70432232679721	-0.93267771736505	-1.81001980407304
76.5	35.5	225.083333333333	12.9014238129054	5.67437728906239	3.03517054872855	-1.70550287912985	-0.923162115317685	-1.81538365230689
76.5	36.5	221.868055555556	12.8834631335604	5.74766148844714	3.04405420724772	-1.72306369337248	-1.14658065908994	-2.33264989525324
76.5	37.5	217.423611111111	12.8885409834265	5.66486612086374	3.01362658078689	-1.69347494668238	-1.19532648352947	-2.33079763266272
76.5	38.5	213.701388888889	12.8896101873184	5.64825700605981	2.99938607847016	-1.67929931749569	-1.15382737814157	-2.30446402293819
76.5	39.5	216.729166666667	12.9386255795614	5.6963141836214	2.98659072963056	-1.68205420726956	-1.12275972308392	-2.29264711625863
76.5	40.5	222.388888888889	12.9258883040813	5.66153726128131	2.99556941806854	-1.70564425584241	-1.17562332267245	-2.30622376113334
76.5	41.5	236.701388888889	12.9508630031985	5.73722263647423	2.99862881244327	-1.70694570655821	-1.15248471079567	-2.30901427179328
76.5	42.5	243.979166666667	12.9340020267513	5.74580362207636	2.98890959542886	-1.71057067288231	-1.15284560874198	-2.32870247904643
76.5	43.5	246.291666666667	12.8750684823327	5.66248175706087	2.98857539184691	-1.69711773627659	-1.18469661398697	-2.33241684669684
76.5	44.5	253.444444444444	12.8817864119153	5.61643787908338	2.96239844564395	-1.70810188021837	-1.18849112176266	-2.34159305376399
76.5	45.5	259.145833333333	12.9386249190867	5.58281163339092	2.98371875819998	-1.69839183518709	-1.16924479139457	-2.39517924666449
76.5	46.5	222.916666666667	12.9076020139730	5.63067286200838	2.97304147597950	-1.66529345274046	-1.13570381313140	-2.30228049466424
76.5	47.5	202.666666666667	12.9586585094262	5.64187188335275	2.97461697130005	-1.65224825360568	-1.21342607680267	-2.3026230546808
76.5	48.5	222.555555555556	13.0018469961213	5.5794705728324	2.99076498240722	-1.67035654867435	-1.16078970658635	-2.31120296447790
76.5	49.5	257.569444444444	13.0506881360566	5.57856626030122	2.95469324319228	-1.66532022493350	-1.21916719694362	-2.29568465819077
76.5	50.5	295.944444444444	13.0117675601928	5.55595393587166	2.93619582996667	-1.62758740400083	-1.19064290336044	-2.25864865285871
76.5	51.5	306.409722222222	13.0105441257368	5.54570330244907	2.93351506458156	-1.63506120268609	-1.17232724179629	-2.25646590729006
76.5	52.5	250.604166666667	13.0436767944208	5.54787190278175	2.95008600760403	-1.66957443843903	-1.18446392495102	-2.30407406247666
76.5	53.5	188.173611111111	13.0141047547814	5.55637857093515	2.95621125083259	-1.71364480191921	-1.19518089548496	-2.38177985715705
76.5	54.5	150.583333333333	13.0490955334209	5.48473608511689	2.95265547043069	-1.72287533261038	-1.14501540896202	-2.08306985453875
76.5	55.5	119.618055555556	13.0676805186947	5.42125345494032	2.9381138649618	-1.74679589128258	-1.21372413428822	-1.96942521278164
76.5	56.5	111.798611111111	13.1238648102540	5.59204485692994	2.95587995575692	-1.70448756171352	-1.21113175368049	-1.95545465423731
76.5	57.5	110.319444444444	13.1675081888679	5.70215505958748	2.98124663015009	-1.68228970984044	-1.01086937600839	-1.91934683642187
76.5	69.5	203.166666666667	13.2004290868348	5.8333161047831	3.07831618595599	-1.70803855880954	-0.735370435967764	-1.54178778154338
76.5	70.5	259.979166666667	13.2019782737042	5.8654794674133	3.10296149268324	-1.69438495521021	-0.89285572402541	-1.54817448960604
76.5	71.5	215.833333333333	13.2305400380167	5.83923535102641	3.05739617526128	-1.67057728587470	-0.843176684746127	-1.51683118840755
76.5	72.5	157.041666666667	13.2259309927012	5.84837808475700	3.08092277119207	-1.68307748659402	-0.8715573551041	-1.34966098566616
76.5	73.5	113.375	13.2551363329813	5.85915345122377	3.06848107409994	-1.65915367626340	-0.920738501449733	-1.32157208255770
76.5	74.5	122.645833333333	13.2749321657562	5.85568520613558	3.06075679698691	-1.66914920133535	-0.928487015656793	-1.33288424381377
76.5	75.5	118.430555555556	13.2783807782025	5.86263936316134	3.04102479485876	-1.67806829948812	-1.09273963942869	-1.61389105113748
76.5	76.5	98.4791666666667	13.2601801290640	5.77713893698319	3.00689192137659	-1.68526225026386	-1.20181387709398	-1.54247929158965
76.5	77.5	82.0972222222222	13.2324710386983	5.80394045251769	3.02394669461531	-1.65486602635630	-1.16281352772107	-1.5341278262389
76.5	78.5	81.3055555555556	13.2237080469574	5.78664955655102	3.0202912264903	-1.64440727401873	-1.12600189587238	-1.57428112548468
76.5	79.5	59.4513888888889	13.2655121663547	5.78551985000081	3.03162423276808	-1.61783647721286	-1.24771792311095	-1.56001863151598
76.5	80.5	58.4444444444444	13.3089894847395	5.81495070754241	3.07696214419185	-1.66085994197345	-1.26491052344951	-1.53024557463923
76.5	81.5	53.8680555555556	13.3233321557994	5.8080993917955	3.06534000648051	-1.63753657707212	-1.05791213951215	-1.47071053271184
76.5	82.5	48.0625	13.3526824436399	5.79281023392906	3.08883817120103	-1.64886104853437	-0.961980250986434	-1.14850480018752
76.5	83.5	43.9930555555556	13.3279023566369	5.75062111199929	3.05564268886166	-1.66949820671058	-1.16749400968672	-1.54723556139857
76.5	84.5	45.5347222222222	13.2913596483493	5.76028222590603	3.07735973409352	-1.63903956485584	-1.24408183959990	-1.54046683911095
76.5	85.5	42.7291666666667	13.3114103769461	5.7916475749471	3.11950099327925	-1.60224539294740	-1.13577374134593	-1.44012335306903
76.5	86.5	40.0416666666667	13.3018243316704	5.82948629041377	3.10312325861411	-1.61015829091543	-0.953796023650938	-1.08393527333711
76.5	87.5	43.2708333333333	13.3003432081356	5.85609615080756	3.08116956898405	-1.58319566307572	-0.838536685375975	-1.08405926235657
76.5	88.5	34.5694444444444	13.3229300897862	5.86031569282231	3.07463677506898	-1.59581122519743	-0.707661824147836	-1.10269907700622
76.5	89.5	35.9166666666667	13.3277531229710	5.86294424338718	3.04971340836132	-1.60816316657174	-0.73813431536117	-1.10443862740572
76.5	90.5	36.9097222222222	13.3347694260016	5.83007418669785	3.03317198155389	-1.61614430938894	-0.761305993350209	-1.09408397236285
76.5	91.5	36.8958333333333	13.3468984991671	5.8351497751653	3.04911621919257	-1.61364531898229	-0.740835819277603	-1.06758335335981
76.5	92.5	36.4305555555556	13.2625560127648	5.85150746309884	3.04739899378697	-1.61278005387930	-0.769627938538005	-1.03353347710357
76.5	113.5	20.0138888888889	13.4171022134315	5.82708871815125	3.15363664281883	-1.67479861249494	-0.889965678250701	-0.949697966487255
76.5	114.5	42.3611111111111	13.3255751880071	5.83216870032449	3.13355013063647	-1.67594959241757	-0.895881260162188	-0.979881950557313
76.5	115.5	49.2291666666667	13.3423336224363	5.80183595404028	3.07786371699682	-1.62816659695315	-0.963686665685594	-1.00431622699513
76.5	116.5	49.125	13.4045151089784	5.86825856810497	3.05368967491881	-1.62929437860821	-1.00958553385096	-0.992046168804305
76.5	117.5	45.4930555555556	13.3412465784783	5.85318504373918	3.04463730726284	-1.61329986993003	-1.14744491147466	-1.33218928405492
76.5	118.5	50.8888888888889	13.3234419777015	5.80322458875334	3.05605654594611	-1.62351533815732	-1.13912185052422	-1.36772891631853
76.5	119.5	62.6597222222222	13.3581409078643	5.79880517296677	2.99081994690694	-1.63600030400766	-1.12742679408115	-1.46989455627334
76.5	120.5	67.9652777777778	13.3567084362766	5.79715973396395	2.98390488262469	-1.61794276246785	-1.12683424771720	-1.41646258371569
76.5	121.5	75.3472222222222	13.3429737182148	5.77694506506325	2.99947763964941	-1.63333458697980	-1.08910431172473	-1.40540032678081
76.5	122.5	77.6319444444444	13.3419438209200	5.77903904501362	3.00286202381679	-1.63466261726277	-1.08624976142845	-1.41568057890007
76.5	123.5	78.6180555555556	13.3462537250414	5.78123681387737	3.03620898846772	-1.66591274487486	-1.07474892051709	-1.39307761629079
76.5	124.5	78.1458333333333	13.3420515636773	5.79654663651208	3.01746992905935	-1.63048944926989	-1.06340463563414	-1.41370721560219
76.5	125.5	66.2361111111111	13.3474790618755	5.7985443766249	3.02153650662815	-1.59434189745496	-1.07536322904632	-1.41889916381160
76.5	126.5	59.3055555555556	13.3566413185921	5.80163110827824	2.99261811460691	-1.60152387692506	-1.09730907400930	-1.51226855576184
76.5	127.5	56.0208333333333	13.3266318677371	5.76928081459528	2.92214991984958	-1.64824133789205	-1.05356369901369	-1.46792777432769
76.5	128.5	56.6944444444444	13.3349990834967	5.76001769052687	2.9052417367204	-1.66429386261436	-1.06146862448325	-1.44312752586361
76.5	129.5	58.8541666666667	13.3683677532394	5.75617243405213	2.99621992146036	-1.68827317266469	-1.03168719209945	-1.36630607085062
76.5	130.5	55.3680555555556	13.3689690480177	5.75555647309877	2.96873687421752	-1.64361595801445	-1.08751967995105	-1.39513739833619
76.5	131.5	48.9583333333333	13.2914787195097	5.75656679149055	2.89325233113714	-1.62497835794832	-1.08555576821349	-1.4320703077064
76.5	132.5	42.8888888888889	13.3459504330142	5.78573249907358	3.01607994965161	-1.65283235359475	-1.15066580653714	-1.42691865769509
76.5	133.5	36.5138888888889	13.3395626963698	5.80747464911759	3.02790334008659	-1.62629069961040	-1.11591929543199	-1.34446701213171
76.5	134.5	29.7569444444444	13.3519281196696	5.83411735487517	3.06173182884584	-1.61703915109837	-0.910307867531955	-0.984272015746022
76.5	135.5	26.2847222222222	13.3886169393402	5.79518831295125	3.13181780422150	-1.63107734456901	-0.914835605781824	-0.99324654576149
76.5	136.5	23.3819444444444	13.5268624297829	5.82531026906719	3.18317903239367	-1.65706161045766	-0.956030942131533	-0.95833425324896
76.5	137.5	22.3680555555556	13.5354338609361	5.83515614459607	3.17129447900102	-1.6566397310313	-0.93990563167657	-0.957934473126182
76.5	139.5	11.2708333333333	13.4928430507950	5.85079190911117	3.13837983237861	-1.66133725741425	-0.870728519862156	-0.929383172366087
76.5	140.5	14.7013888888889	13.4774840392079	5.86223988466909	3.07577270406081	-1.65437775679307	-0.862885038657911	-0.936547388163823
76.5	141.5	15.2152777777778	13.4899630981249	5.86510254512751	3.05404176972547	-1.66295831299948	-0.87541216756895	-0.94318036418945
76.5	142.5	22.5972222222222	13.5156827433545	5.83376984002005	3.02932425468474	-1.65941483723432	-0.890560549213936	-0.944031973962539
76.5	143.5	29.9375	13.3982226174588	5.81673087735031	3.01378433794165	-1.67839019441184	-0.870961084440772	-0.948694957950508
76.5	144.5	34.8125	13.3612568478738	5.79677282763359	2.96775898546239	-1.68434501296825	-0.837546256047155	-0.96371724188095
76.5	145.5	35.6597222222222	13.3677475606355	5.79249322462852	2.95788112716099	-1.68208307659831	-0.831006444220814	-0.963561679419348
76.5	146.5	35.8541666666667	13.3607639773383	5.79110760686101	2.95240947928784	-1.65848039303601	-0.812454590035579	-0.97490070440563
76.5	147.5	35.875	13.3445754294987	5.74153972480067	2.94090949044023	-1.66624013958615	-0.794180193996123	-0.98441836368753
76.5	148.5	28.6111111111111	13.3108458712613	5.72132965935036	2.96759475687191	-1.68821596235416	-0.789524978051082	-0.993664636922211
76.5	149.5	35.8819444444444	13.3331999076806	5.73947439806385	2.97140954176322	-1.7017149017679	-0.848370105405331	-0.989125069878008
76.5	150.5	39.6319444444444	13.3655907638736	5.73583313022856	2.92540288487696	-1.69489245936613	-0.832607893093382	-0.968145619739798
76.5	151.5	40.2986111111111	13.3034287778860	5.70977897622949	2.92092842079195	-1.69747875046842	-0.848655528906326	-0.96270177331794
76.5	152.5	36.75	13.3100136784083	5.72960115887692	2.92313444012821	-1.69040363655280	-0.865478894368617	-0.980785082596326
76.5	153.5	40.7569444444444	13.3246816418818	5.68568549096262	2.95254994145657	-1.68989037574446	-0.889410135123582	-1.07640317170748
76.5	154.5	43.7569444444444	13.2975213009814	5.67088461048726	2.94010746105364	-1.68185405145901	-0.938111015756851	-1.16962745886313
76.5	155.5	45.75	13.2822425378027	5.60281784003627	2.93438099481901	-1.65481592583886	-0.961977679142265	-1.17905496128041
76.5	156.5	43.0069444444444	13.2236415374693	5.58109094021502	2.85056198304234	-1.65159600120294	-1.18537440942681	-1.52589592823728
76.5	157.5	41.625	13.2292982488720	5.44431972332468	2.87067813130276	-1.68948184489882	-1.18297154215037	-1.52181474099459
76.5	158.5	50.2569444444444	13.2775963461035	5.33150819264013	2.93306996922028	-1.75086913660313	-1.11659251416819	-1.48858901202535
76.5	159.5	62.3125	13.2255099500207	5.25755760240997	2.84435870904457	-1.76069120234711	-1.10760728531913	-1.66983105145308
76.5	160.5	70.6111111111111	13.1595578169463	5.25738923878825	2.80612046183011	-1.76160458608104	-1.09063263008350	-1.72908779184838
76.5	161.5	74.6319444444444	13.1926843378162	5.25043669423709	2.87369509266134	-1.73780150445515	-1.07868522323683	-1.70090850182778
76.5	162.5	75.7847222222222	13.1747372939306	5.59744517298915	2.97798898299603	-1.72031782325972	-1.11123982499971	-1.58381382680514
76.5	163.5	82.0416666666667	13.1645279260111	5.52041481897122	2.94386610615932	-1.79200565213927	-1.10569509105102	-1.57863028687598
76.5	164.5	96.4305555555556	13.1895822810805	5.4440494259984	2.92987897453816	-1.79241988358828	-1.07625145509486	-1.60993870549473
76.5	165.5	120.784722222222	13.1399723808155	5.41886951433605	2.94863247399975	-1.76792605723704	-1.12092512304897	-1.81893684492283
76.5	166.5	158.118055555556	13.1216203141871	5.39938006063199	2.96128695636879	-1.81465685493273	-1.12584824649379	-1.83164609601088
76.5	167.5	198.715277777778	13.1072784918313	5.56043703281215	2.98856256668601	-1.72700849279257	-0.934151932123408	-1.67267728068794
76.5	168.5	219.25	13.1071101539517	5.62432548738895	2.97576923385779	-1.72461512388456	-1.10108135135387	-1.96131257512066
76.5	169.5	239.118055555556	13.1438332773992	5.55434684797146	2.95339821753903	-1.71759127141915	-1.13331663123230	-1.91790444916312
76.5	170.5	261.208333333333	13.1671726228895	5.53836162312406	3.01343178264759	-1.7108237060878	-1.03136015873029	-1.79445014788785
76.5	171.5	288.902777777778	13.1470783224288	5.6275992598092	3.0100166837324	-1.67347222455075	-0.891735729533684	-1.41329148080691
76.5	172.5	327.375	13.1932675152950	5.7078608658088	3.04956700225271	-1.65889999630766	-0.877500822888501	-1.49137938883204
76.5	173.5	407.854166666667	13.1503184437168	5.56000773904626	3.01242073822266	-1.66187403457713	-0.856956410561809	-1.61918737400007
76.5	174.5	548.909722222222	13.0939552784055	5.42029560208651	2.99240294209724	-1.70897186483005	-0.808204620754634	-1.73982392741059
76.5	175.5	701.243055555556	13.1679213031189	5.4252599389847	2.96175679636512	-1.74179078137233	-0.765812772996525	-1.78066207408351
76.5	176.5	902	13.1064912958058	5.45603725744690	2.98068356845356	-1.91935427108507	-0.786284040912531	-1.82141613935666
76.5	177.5	1062.72916666667	13.1137121940139	5.55169169594828	2.98132441902561	-1.90259607394295	-0.793641108745258	-1.90468391570981
76.5	178.5	1095.625	13.0637037312284	5.56976109021739	2.95206503758032	-1.88142668690868	-0.829203899639118	-1.81997876658751
76.5	179.5	1111.34722222222	13.0559520449470	5.45417731196053	2.95873175430484	-1.90991171738575	-0.801511967126755	-1.77827342711780
75.5	-179.5	853.8125	13.0466977258574	5.4952802964474	3.03259159369069	-1.85847473766638	-0.853232708096279	-1.87391197838276
75.5	-178.5	864.909722222222	13.0533419036920	5.49903814756358	3.00699342134153	-1.90595162107207	-0.868322523302449	-1.74403201670838
75.5	-177.5	922.784722222222	13.1103578631141	5.53782979403562	3.02307411995617	-1.86457133165086	-0.761230109046215	-1.62278929833209
75.5	-176.5	1158.47916666667	13.0586323558846	5.27221749884666	2.94623745878242	-1.99823431296967	-0.789677423267213	-1.85022989791835
75.5	-175.5	1277.375	13.0795929927026	5.31435629626003	2.89566923413887	-1.93186259886664	-0.800198212092733	-1.88504428535132
75.5	-174.5	1256.38888888889	13.1290469108244	5.12382452316906	2.81366471630840	-1.97213659327598	-0.875355518645938	-2.23518795058479
75.5	-173.5	1204.78472222222	13.1271646072645	5.14478325886669	2.8661271456823	-1.96685332179194	-0.948331467097558	-2.28113075925909
75.5	-172.5	1117.49305555556	13.1184853226377	5.06769569029623	2.8324388354888	-1.96844372771083	-0.954232162344967	-2.33806184853573
75.5	-171.5	1096.55555555556	13.0980576356452	4.91738795231687	2.72670084544482	-2.03137555152567	-0.975919861189552	-2.36402646451950
75.5	-170.5	847.951388888889	13.0743665056911	4.97778025458983	2.85484463214571	-2.00580520386295	-1.07635479706071	-2.37081687951549
75.5	-169.5	415	13.0324661990935	5.00921962873006	2.90136665213670	-1.74831477538454	-1.01297238014405	-2.30868883456382
75.5	-168.5	236.409722222222	13.1072609424204	5.08872242870807	2.79344112523916	-1.74130485420258	-1.17400949159441	-2.23063673358373
75.5	-167.5	215.215277777778	13.0738881796759	5.10438354033272	2.85626904004355	-1.76525892918235	-1.07765974289504	-2.19345738907094
75.5	-166.5	356.597222222222	13.1001799496181	5.07925600720714	2.92274540444334	-1.74277961338355	-1.08202987492424	-2.28628140478011
75.5	-165.5	519.979166666667	13.1535517905024	5.08220623030485	2.82666650062222	-1.76691299475459	-1.00383701300961	-2.27201487428754
75.5	-164.5	770.541666666667	13.1064829098179	4.98228659937002	2.74354033112764	-1.94653642845412	-0.98895419919309	-2.30745360197006
75.5	-163.5	1718.45833333333	13.0598882437082	4.99218572014676	2.63489850492215	-1.97889357646396	-0.931215594687973	-2.47037403663068
75.5	-162.5	1865.8125	13.0921834096458	5.03364312114345	2.80943799794430	-1.98450489307373	-0.928566537537158	-2.58775723539987
75.5	-161.5	1897.42361111111	13.1082993343381	5.15879702386222	2.81217349801142	-2.00877221571595	-0.945439855917753	-2.52813931487884
75.5	-160.5	1930.36111111111	13.1195085080786	5.00917124211021	2.81614168526206	-1.98945048268379	-0.945837943990103	-2.4192738870634
75.5	-159.5	1364.57638888889	13.0984761099480	5.00312905557583	2.61922637414005	-1.98378830901802	-0.971393243272147	-2.31592176877121
75.5	-158.5	895.631944444444	13.122238282753	5.01324833386572	2.66110240050494	-1.98537714137692	-1.03889516481050	-2.21483454681464
75.5	-157.5	1219.01388888889	13.092604609093	4.97140655281996	2.63741525170735	-2.04120140976906	-1.03612187735928	-2.34183553699117
75.5	-156.5	2103.07638888889	13.0390470435736	4.70272249305627	2.58225077018097	-2.11002662818945	-1.06626250116912	-2.81061978274201
75.5	-155.5	3511.46527777778	13.0495147086564	4.85490646000168	2.42299448303512	-2.03554014475026	-1.05048049474301	-2.91173875420932
75.5	-154.5	3744.11805555556	13.0539559519071	4.8773543344707	2.41168615259894	-2.00964139351937	-1.03107364922924	-2.87303496166399
75.5	-153.5	3769.8125	13.0483696947252	4.91904466589118	2.33574110038528	-1.95797715501815	-1.04384907870373	-2.90198947549237
75.5	-152.5	3789.38194444444	13.0091012704927	4.87833642677607	2.24854109879786	-1.97509386886851	-1.11433382499728	-2.91117313634213
75.5	-151.5	3801.55555555556	13.0231448377204	4.85852183578049	2.22008989692241	-1.99990678703654	-1.11594027155593	-2.96284056517435
75.5	-150.5	3812.74305555556	13.013951305914	4.57214114936338	2.22509775603923	-2.01957616274362	-1.12115049383439	-2.98021243721074
75.5	-149.5	3796.07638888889	13.0117004708097	4.51565277013093	2.25455671861518	-2.00266687237806	-1.12005511481554	-2.99264940582048
75.5	-148.5	3740.75694444444	13.0564103032245	4.49167340115878	2.35430727033273	-2.02303666755909	-1.11336593834568	-3.06903612543226
75.5	-147.5	3756.81944444444	13.0597335236530	4.48955933620109	2.45950265676638	-1.99503723113384	-1.08881779298281	-3.05037917253173
75.5	-146.5	3732.68055555556	13.0822260314865	4.51034535320277	2.37603953198520	-1.99837474063714	-1.09303004277165	-3.02602844106279
75.5	-145.5	3695.84027777778	12.9880050292081	4.60960418776986	2.36410406991541	-2.01056462238046	-1.13867084358457	-3.01875991096616
75.5	-129.5	1080.25	13.1729942663584	4.72012452237552	2.75242597008461	-1.91934121318645	-1.01077437042285	-2.04853899991452
75.5	-128.5	554.0625	13.1341065239091	4.68925919530798	2.82786901869786	-1.78517547386891	-1.00379875625309	-2.00779725719556
75.5	-127.5	392.513888888889	13.0634181699906	4.91326674475404	2.82695529051666	-1.77762703191756	-0.958101496689075	-1.81007124938657
75.5	-126.5	376.5625	13.0837160491342	4.98868157124531	2.90935783712995	-1.79795565547794	-0.940231274734914	-1.67711790375815
75.5	-125.5	389.652777777778	13.1059562734434	5.10181038205219	2.91824154858919	-1.79016936954272	-1.17955766892095	-1.65796264429790
75.5	-124.5	407.451388888889	13.1387122801216	5.40107789688297	3.06131378994629	-1.75924140750403	-1.00545528045244	-1.56066206531443
75.5	-123.5	395.902777777778	13.2176270832169	5.35267629505669	3.07235414358395	-1.73068152912080	-0.957840433114283	-1.53486200106905
75.5	-122.5	346.0625	13.2077809034882	5.29007279060007	3.06514584735406	-1.74725330515511	-1.00975309214582	-1.54110300390676
75.5	-78.5	389.131944444444	12.9961066323292	5.67129134777038	3.04307411512278	-1.64397841317058	-1.07786605097322	-1.37555906127836
75.5	-77.5	329.895833333333	13.0757336010380	5.70462859062075	3.03285968426751	-1.66537033358132	-1.14390518926027	-1.38854028100347
75.5	-76.5	340.770833333333	13.0470508258314	5.75854429458048	3.02871388735711	-1.67200913776534	-0.883778811934196	-1.35519416278965
75.5	-75.5	403.138888888889	13.0317107860458	5.74792818340089	3.00487596050498	-1.68255956754258	-0.832689267801817	-1.35355006462944
75.5	-74.5	475.8125	12.9223340734509	5.66521542099977	2.94266165015130	-1.64115980066491	-1.30301998056816	-1.39893788394306
75.5	-73.5	540.909722222222	12.9520606437417	5.66591577137157	2.97810540341799	-1.59800822292387	-1.3022494960337	-1.42953646853340
75.5	-72.5	562.5	12.9535044066888	5.65435291477563	2.984412660729	-1.62463034461673	-1.29295739383164	-1.43245800960396
75.5	-71.5	583.5625	12.9765068373718	5.65828125524644	3.11481230057201	-1.6143026635039	-1.14296300415261	-1.41664305763521
75.5	-70.5	602.493055555556	12.9388358245759	5.65538911883101	3.08939817065139	-1.62921131828445	-1.21953936743333	-1.44224573410435
75.5	-69.5	583.694444444444	12.9807824272071	5.65732125031365	3.00329716252172	-1.66224235320766	-1.28100301585700	-1.43949736564667
75.5	-65.5	385.902777777778	13.0636589483730	5.63064416652374	3.03684861558027	-1.63499719090788	-1.12024877295992	-1.40376161425113
75.5	-62.5	493.215277777778	13.0719046179055	5.57598111385516	2.98873177844895	-1.67100888073172	-1.20909513429149	-1.56370604858483
75.5	-61.5	588.659722222222	13.0860704021114	5.56534146808516	3.00162472465449	-1.65091692194234	-1.18472128916275	-1.52345395488467
75.5	-16.5	206.326388888889	13.0170760955421	5.68639641571463	3.00015381720504	-1.65634407840605	-0.90033304469186	-1.70059856815915
75.5	-15.5	173.993055555556	13.0474962685527	5.70193229230737	3.01972618643626	-1.66531606185423	-0.821013911979041	-1.61806209740861
75.5	-14.5	206.916666666667	13.0628621043179	5.6905182938806	2.98313390649317	-1.67564284575251	-0.8718167726732	-1.74708911817241
75.5	-13.5	232.888888888889	13.0714031351538	5.61076731142285	2.9863832987724	-1.65548419806627	-1.10966859718753	-2.18504268541659
75.5	-12.5	364.243055555556	13.0462110320642	5.68010786566357	2.96495043653112	-1.58260932278517	-0.945426533811096	-2.1186009346654
75.5	-11.5	931.034722222222	13.0127184497519	5.78578834073375	2.94842444389943	-1.72920328742444	-0.74445388752219	-1.73888033695753
75.5	-10.5	1684.99305555556	13.0542313058033	5.68503945782594	2.82509800650268	-1.78588081489276	-0.686519523097445	-1.77913578351421
75.5	-9.5	2212.72222222222	13.0771367405318	5.66735711173166	2.80800406661074	-1.79381784746567	-0.675031484812386	-1.86580755581896
75.5	-8.5	2608.10416666667	13.1456849302832	5.63542702827942	2.79405471447378	-1.80534669265690	-0.636972408975431	-1.86844663239031
75.5	-7.5	2986.25694444444	13.1665911655163	5.63639197082114	2.75441984438527	-1.84382534562201	-0.610658424074097	-1.92846444317749
75.5	-6.5	3234.65277777778	13.1794949980232	5.62791855961751	2.77209274046641	-1.8731976491715	-0.636275911430088	-1.98834749758353
75.5	-5.5	3386.24305555556	13.1818319740618	5.65318833376356	2.76892788739198	-1.82590234979022	-0.66236981559671	-1.92206575681175
75.5	-4.5	3507.25	13.1232026809032	5.70980247546794	2.74476545730397	-1.82808317677826	-0.596810930765876	-1.83580698228029
75.5	-3.5	3607.50694444444	13.1120420715558	5.6665884523093	2.74915615651139	-1.82849000394918	-0.526517093714242	-1.92325674315308
75.5	-2.5	3649.11805555556	13.0974507434169	5.6257497569352	2.76754621780386	-1.89920986037094	-0.491897720765359	-1.89703701182366
75.5	-1.5	3652.68055555556	13.0267171502825	5.64386656866045	2.74191348540200	-1.90635432355188	-0.48793724169856	-1.99922507919824
75.5	-0.5	3357.97916666667	13.0156845005643	5.63754998188778	2.78126306536091	-1.86818405411520	-0.555266438124332	-1.9154213949375
75.5	1.5	2708.56944444444	13.0006171447763	5.62871664859596	2.79622225347832	-1.86365604484641	-0.599425720847628	-2.00118573925945
75.5	2.5	2857.39583333333	13.0075152196421	5.59716632126745	2.78173213133870	-1.90795651530967	-0.688532712312869	-2.48767297061466
75.5	3.5	3000.55555555556	12.9545178704976	5.58047480116317	2.73638046265827	-1.91434336158507	-0.894831973207358	-2.63973693267022
75.5	4.5	2783.625	12.9500028486163	5.53686635168649	2.79533775841316	-1.9130346232611	-0.944692256536404	-2.52551876613765
75.5	5.5	2731.04861111111	12.9036587819526	5.52655818443128	2.83185153892714	-1.90681878069411	-0.986667219775655	-2.52087528720309
75.5	6.5	2436.09027777778	12.9116157395689	5.60210158784528	2.78600272862834	-1.9046198205501	-0.97213864308065	-2.50190643254491
75.5	7.5	2780.04861111111	12.9013579555586	5.62514456393297	2.69295995217302	-1.88497093392690	-0.982835351929105	-2.46909172372719
75.5	8.5	2466.88194444444	12.8792384404585	5.67931593778557	2.70553812932184	-1.85013762141795	-0.982246263374011	-2.46876445727682
75.5	9.5	2414.55555555556	12.8577983639074	5.67485090627086	2.72433844807712	-1.83379354997240	-0.997951408746574	-2.4875335917759
75.5	10.5	2350.6875	12.8769632252643	5.68989430872423	2.7682350356491	-1.85703938577056	-1.04683540423101	-2.51324024350001
75.5	11.5	2168.28472222222	12.8610896329733	5.7287304128272	2.77228327279247	-1.82859250523238	-0.98366827787063	-2.49052389882433
75.5	12.5	1818.09027777778	12.8624469805100	5.7624184261564	2.82741059883279	-1.70991249175636	-0.97133484392205	-2.39189948325393
75.5	13.5	1282.80555555556	12.7438029829758	5.80257053681426	2.8532012627513	-1.60717136994625	-0.818120469606778	-2.30740554988967
75.5	14.5	642.493055555556	12.8040753715127	5.89003567060962	2.88683827916740	-1.01673968163922	-0.608584464115049	-2.22166890133042
75.5	15.5	365.333333333333	12.8446246348883	5.97094583041552	2.95421072503753	-1.17898405977673	-0.735341458170387	-2.09868554067059
75.5	16.5	245.361111111111	12.8301257399507	5.9702478168728	2.96091512325156	-1.43146014186772	-0.851235345314868	-1.72796141576895
75.5	17.5	179.305555555556	12.7951168309393	5.936868841661	2.96792014715621	-1.61055826329663	-1.04241619910108	-1.65295050566926
75.5	18.5	92.7222222222222	12.8765606785244	5.96032659449915	3.05108418324599	-1.59848424340098	-1.04030526210666	-1.39457303090836
75.5	19.5	57.6458333333333	12.8877576919925	5.94795546209366	3.03751650096023	-1.54511719836838	-1.06729683158071	-1.38720844469602
75.5	20.5	47.7777777777778	12.8457585138158	5.93143763964147	3.01815149178693	-1.54081852988255	-1.19736856642957	-1.37908925058133
75.5	21.5	47.1736111111111	12.8226745887091	5.93063337254905	3.04213498703762	-1.52096707361993	-1.12158072181362	-1.35877565681534
75.5	22.5	62.3819444444444	12.8529053041523	5.88543141769535	3.05951720407899	-1.56906560649484	-1.15013200299612	-1.39087549665131
75.5	23.5	93.2361111111111	12.8445560046823	5.80984095050402	3.04268989234895	-1.67606407400910	-1.01591402901141	-1.52986187426308
75.5	24.5	118.895833333333	12.8145193688813	5.82474283541475	3.05504779991178	-1.66563059494820	-0.966567973008064	-1.58030158685275
75.5	25.5	147.270833333333	12.8041647209095	5.8031189483778	3.06638810401375	-1.66002242702680	-1.04395240452801	-1.60275691094679
75.5	26.5	181.791666666667	12.7559016437651	5.78945125081857	3.05422949521897	-1.64739204590280	-1.03779437990357	-1.77801254462101
75.5	27.5	248.694444444444	12.7309971652536	5.92624447907504	3.08556009715620	-1.6234907230275	-0.953026287451339	-1.79202127712286
75.5	28.5	278.270833333333	12.785092667992	5.91760307877826	3.10760321667541	-1.61130926285563	-0.810210320293975	-1.71080964584282
75.5	29.5	325.798611111111	12.7804538424411	5.92076000515022	3.09346711027701	-1.61210944189832	-0.837510493738225	-1.76652677052861
75.5	30.5	347.076388888889	12.8040145684981	5.91174525613941	3.06528361482953	-1.57956115859962	-0.794163851492427	-1.80909392177591
75.5	31.5	326.222222222222	12.8279007610502	5.91137005322729	3.05916200662023	-1.61485575694328	-0.856992386397677	-1.74777001295873
75.5	32.5	273.819444444444	12.7912418583232	5.90384159661786	3.06692218273479	-1.64654685938977	-0.865193117497552	-1.73623154181201
75.5	33.5	216.270833333333	12.8049652105299	5.87318050755287	3.09220562672451	-1.67942915476403	-0.915905662230975	-1.80983622564970
75.5	34.5	188.5625	12.8332255206290	5.84409154098932	3.07838262045195	-1.70476155442458	-0.922219359584272	-1.80644763111134
75.5	35.5	176.152777777778	12.8857692734639	5.77922982500998	3.05811561480805	-1.72653917368018	-1.08773175322353	-2.16409311819689
75.5	36.5	180.368055555556	12.8881903268501	5.75998165742874	3.0448706149976	-1.72346847893942	-1.22526872653992	-2.30847628730304
75.5	37.5	190.888888888889	12.9021475569382	5.68569711553919	3.03126118456404	-1.71536165641345	-1.21025313405288	-2.31827537317783
75.5	38.5	209.513888888889	12.8456485979649	5.64636879253025	3.00653048540835	-1.65713243521434	-1.23277753128459	-2.30097270572248
75.5	39.5	234.875	12.8640543475140	5.63768298293407	2.98364931217827	-1.66030909063791	-1.29103758769023	-2.27868794576506
75.5	40.5	231.243055555556	12.8250497919064	5.64440272668856	2.97476033907982	-1.66233403171149	-1.22199866070631	-2.29273871139169
75.5	41.5	238	12.8471489949927	5.65326320479883	2.97319899662912	-1.67040814593358	-1.22639762106209	-2.29093453803101
75.5	42.5	291.833333333333	12.8761539737724	5.68736618793723	2.99209889618651	-1.65481903773283	-1.31767037105172	-2.34039875457869
75.5	43.5	305.590277777778	12.8365511988114	5.70351927402102	2.98612600362844	-1.67130611381030	-1.24678338108258	-2.35153630110533
75.5	44.5	286.520833333333	12.8533735990124	5.68542028494749	2.97329789283906	-1.68999879656391	-1.20650503530922	-2.3383598222726
75.5	45.5	287.076388888889	12.8170378201381	5.68357633336599	2.95055072774979	-1.67646723450565	-1.18811220178079	-2.35317946047863
75.5	46.5	277.729166666667	12.8487759335050	5.67028159269164	2.965782713936	-1.66224872012472	-1.17777389779805	-2.34256723919188
75.5	47.5	259.236111111111	12.9096246926172	5.64228288311715	2.96740339636656	-1.67504627274255	-1.22038725298387	-2.34821073518972
75.5	48.5	245.972222222222	12.8946992131748	5.61680342811017	2.96605846396362	-1.68144142501207	-1.26091843920443	-2.35188275887224
75.5	49.5	242.291666666667	12.9083601999386	5.58362548273177	2.95972177923127	-1.68203064922195	-1.214410912072	-2.39020360320942
75.5	50.5	225.5625	12.8899689936313	5.45882971823181	2.89216418637204	-1.73681788536717	-1.24654995382845	-2.40620525780754
75.5	51.5	174.527777777778	12.8755222966481	5.38178970946945	2.87639217832030	-1.74655277354484	-1.24633587899632	-2.35129458875416
75.5	52.5	154.340277777778	12.9166534485227	5.54866542380412	2.92381504953842	-1.63349772789992	-1.23949496313744	-2.05214571746523
75.5	53.5	160.243055555556	12.9638955720925	5.6436311389496	2.99406486051030	-1.65122287850855	-1.15332547319790	-1.96603114150141
75.5	54.5	152.8125	13.0518821887272	5.73898149148392	2.97264180980169	-1.64550884733912	-0.962368307876526	-1.55340903951928
75.5	55.5	133.972222222222	13.0271404924641	5.77351426257689	3.00533798966969	-1.63264150512409	-0.844771650280213	-1.47225210300039
75.5	66.5	207.576388888889	13.3249976132786	5.82348492630539	3.14511918475159	-1.63500469231594	-0.920436576236149	-1.47940649454775
75.5	67.5	228.4375	13.2699248243395	5.82745695526555	3.13701219899718	-1.63896252481328	-0.909096524037401	-1.52991244191468
75.5	68.5	226.715277777778	13.2606468816598	5.86282613114614	3.1555581898195	-1.65593669444886	-0.951806988390965	-1.52643083002979
75.5	69.5	172.104166666667	13.2511118653724	5.94793612657706	3.16653921214909	-1.64400193450854	-0.94647865410111	-1.49448024747138
75.5	70.5	126.138888888889	13.2394389850146	5.87557766322705	3.14911837359386	-1.60864761095530	-0.902173925036248	-1.32030380978365
75.5	71.5	113.541666666667	13.2498548064607	5.86993024557697	3.14079036771737	-1.60879991892608	-0.922472047052655	-1.25141538594118
75.5	72.5	79.9652777777778	13.2498993073914	5.85157723627453	3.11296828379181	-1.60358326592577	-0.935298248934894	-1.20363527598138
75.5	73.5	58.2013888888889	13.2531661953515	5.90202033624924	3.08600836455446	-1.60766698447271	-0.94486606422176	-1.23606164844303
75.5	74.5	49.0763888888889	13.2563941777620	5.89133289192612	3.0711514714716	-1.60303525003162	-0.910700379668824	-1.19713917454802
75.5	75.5	52.4375	13.3020213016936	5.87052804231213	3.07856939531633	-1.63376844970161	-1.00293928483204	-1.58706632781835
75.5	76.5	45.2847222222222	13.3006208538536	5.87648925059671	3.07047123245958	-1.62805451143808	-1.10445630480215	-1.67262558917079
75.5	77.5	39.6875	13.2648327003779	5.8633546281033	3.09450892391300	-1.60343853423521	-1.05711241917663	-1.18676358500779
75.5	78.5	44.1736111111111	13.2917675027637	5.84437862986422	3.10955491864592	-1.5954129326064	-0.969636904004106	-1.15346343262154
75.5	79.5	42.9305555555556	13.2860797072198	5.86839862183542	3.12781647988901	-1.59254212224856	-0.929727320238884	-1.14402678445589
75.5	80.5	43.7569444444444	13.3230568426009	5.80626092231946	3.11354589633350	-1.60713990228008	-0.912313225118928	-1.15286200451379
75.5	81.5	29.3125	13.3350695364984	5.83513495425259	3.10940021979456	-1.62945965250362	-0.868792735606845	-1.12014246297841
75.5	82.5	27.8402777777778	13.3575839592797	5.8601416350419	3.10438996392717	-1.63946272303121	-0.82772683944497	-1.09513243335096
75.5	83.5	47.1597222222222	13.2992526306732	5.84044477078849	3.10158530597326	-1.59370768097058	-0.867927508778966	-1.14374712650711
75.5	84.5	39.8611111111111	13.3177608658108	5.91066510157095	3.12118013721301	-1.60792324301977	-0.924230992076453	-1.15003867188867
75.5	85.5	41.5902777777778	13.3616740301686	5.80961841669101	3.23025981067532	-1.60845331262905	-0.941772919895459	-1.14394232229020
75.5	86.5	35.1805555555556	13.2964891167467	5.83046833423432	3.15277434908422	-1.6248252592549	-0.886140420047436	-1.13941467809488
75.5	115.5	37.0347222222222	13.3673062187532	5.82187731238804	3.14571181358281	-1.65980156254748	-0.88016137176195	-0.98684874491344
75.5	116.5	24.0208333333333	13.3916886100211	5.85174811593858	3.09691045429730	-1.63187984196079	-0.853905329712675	-0.98747543959169
75.5	117.5	26.1180555555556	13.3810086825954	5.84245996219438	3.11514806367802	-1.6117196315531	-0.824041188480358	-0.99107056668461
75.5	118.5	32.3402777777778	13.3687636422207	5.84718055721533	3.11498692846076	-1.61816428114099	-0.82623870668688	-0.991621278902713
75.5	119.5	38.9166666666667	13.4116322079292	5.84158624832073	3.12317685690777	-1.61885011284253	-0.858153143996995	-0.965944444409126
75.5	120.5	47.4722222222222	13.4169196752888	5.86152883321925	3.13965548886372	-1.61988929488816	-0.854529972918738	-0.97596520182752
75.5	121.5	48.3819444444444	13.4139746670533	5.8621210422087	3.15258471845799	-1.60810432331654	-0.851282989698673	-0.97733715269616
75.5	122.5	46.0347222222222	13.3667629850229	5.84706497820687	3.13818673736731	-1.59533257628229	-0.834129298748331	-0.986688860033939
75.5	123.5	42.4097222222222	13.31444443042	5.83246697402955	3.10790189300625	-1.61560753659453	-0.878578966610685	-0.99828149703001
75.5	124.5	44.0069444444444	13.3525976766580	5.83690679199456	3.13032287644137	-1.61742415767766	-0.823033276933359	-0.984268094663633
75.5	125.5	40.9652777777778	13.3620213227032	5.84445254812832	3.13644332596977	-1.62521794764945	-0.815101034501381	-0.988845627252488
75.5	126.5	39.9722222222222	13.3837364509004	5.83788072883556	3.13822379715481	-1.62207655802791	-0.814199089367322	-0.98912301728077
75.5	127.5	40.7222222222222	13.3498775206687	5.82543699507694	3.11193088572202	-1.62687109396753	-0.892703267232084	-1.03948684678309
75.5	128.5	40.9166666666667	13.3208538979493	5.82046970921838	3.07725036257816	-1.62703743302202	-0.8985768015489	-1.04300266741903
75.5	129.5	43.375	13.3201439322562	5.80200788685212	3.10211200168101	-1.58879353925080	-0.8542685306912	-1.00686517202013
75.5	130.5	42.5555555555556	13.3347134375924	5.80060817234329	3.09295334861571	-1.58705539178341	-0.838968154187633	-1.01322593686728
75.5	131.5	21.8680555555556	13.3522075756440	5.80118387108401	3.16573871139717	-1.61866276515214	-0.90746583345604	-0.978485577741754
75.5	132.5	19.4583333333333	13.3706841122377	5.79759560088787	3.16814353644573	-1.62148019643557	-0.899183358319448	-0.979998454310623
75.5	133.5	27.1319444444444	13.3544173547162	5.80163942870998	3.17171053724872	-1.64633746897379	-0.92500303665435	-0.986020067422207
75.5	134.5	33.8125	13.306309678835	5.79417302195211	3.15548003819223	-1.67932444567445	-0.942222786681308	-0.985253199453399
75.5	136.5	17.8194444444444	13.4231221415503	5.83006965785532	3.11075156233225	-1.6883502278129	-0.935632636895233	-0.944177362213415
75.5	145.5	14.7152777777778	13.3783150499320	5.85573439335583	2.99339193418718	-1.69194437116988	-0.80183729485365	-0.921024399835127
75.5	151.5	18.7013888888889	13.3548606230039	5.8504446378759	3.01891503905165	-1.69869443290453	-0.837620169677574	-0.920621999011118
75.5	152.5	18.5	13.3300780830749	5.83495464362219	3.03978262622070	-1.69021340118140	-0.836239496438142	-0.929875847198214
75.5	153.5	24.4305555555556	13.2343047977916	5.82990704461563	3.02037318058272	-1.69273678038829	-0.83842942816447	-0.938586678490553
75.5	154.5	27.2777777777778	13.2685379676353	5.83984669043182	2.99341613753282	-1.67945717221182	-0.866098145807672	-0.95100323774427
75.5	155.5	32.9444444444444	13.3232070561295	5.84560216525299	2.95668978569731	-1.67211947623178	-0.819593373941016	-1.00325856448706
75.5	156.5	37.9305555555556	13.2594553166377	5.7551717582273	2.95155971493587	-1.69198438439960	-0.783687553207074	-1.012496887416
75.5	157.5	40.5694444444444	13.2616245426996	5.74961453598337	2.97713248545993	-1.66240120825109	-0.834759353109067	-1.07909385744107
75.5	158.5	42.1180555555556	13.2947520660772	5.732272571165	2.90924479538825	-1.64187295312762	-0.813106853306318	-1.05579216147858
75.5	159.5	43.3611111111111	13.2766926038918	5.69942618697203	2.91024613354268	-1.65974424297824	-0.860709422418589	-1.06913728006815
75.5	160.5	45.5763888888889	13.2493238983108	5.65208852944157	2.92188107723558	-1.64112731358667	-0.884724469307241	-1.28810032946821
75.5	161.5	46.8125	13.2035056203785	5.50319638591525	2.91742205448999	-1.67781868570894	-1.08317100415446	-1.63168774825631
75.5	162.5	47.6597222222222	13.1943178972782	5.40826104871924	2.93755892323318	-1.76071438709954	-1.11661174829100	-1.63345750156139
75.5	163.5	51.8888888888889	13.1467749015127	5.34639373969032	2.91899928994301	-1.73874661898743	-1.13683082154648	-1.62119959694736
75.5	164.5	59.6875	13.1889011607217	5.32724728995986	2.86662815281243	-1.73422929033094	-1.14954987675929	-1.57785496135741
75.5	165.5	65.9791666666667	13.1658453362784	5.34685392962494	2.84576384548845	-1.72754528408454	-1.11663564286163	-1.59427502818548
75.5	166.5	72.4305555555556	13.1451660657831	5.36864914606742	2.93934590820838	-1.72949825033085	-1.09786641198384	-1.64816889235496
75.5	167.5	88.7430555555556	13.0470015851191	5.34639172323589	2.92406135281331	-1.79089464559504	-1.18011615091547	-1.60451691704182
75.5	168.5	99.5416666666667	13.1406699114285	5.39898830321109	2.91318798456709	-1.75072168731863	-1.00854296670360	-1.25165234428051
75.5	169.5	113.277777777778	13.1565898734409	5.47753957773106	2.94373617818165	-1.72573755924511	-0.958329641431969	-1.28031909640618
75.5	170.5	134.868055555556	13.1396295808466	5.49612375970525	2.94899376298197	-1.72092669989771	-0.944119011962814	-1.29601658649763
75.5	171.5	155.868055555556	13.1889613356880	5.67729964060721	2.94079736157289	-1.67651236068481	-0.87048572016812	-1.33195295254083
75.5	172.5	176.701388888889	13.1732470728374	5.68548127127698	2.92991617460565	-1.69879813899294	-0.902289680012746	-1.49568880781132
75.5	173.5	193.277777777778	13.1823262303451	5.73484489616591	2.9357582427074	-1.70500913593692	-0.902373913814307	-1.53691411642883
75.5	174.5	213.708333333333	13.1682206921468	5.65321933994628	2.96923640639881	-1.68461840594356	-0.964217403748465	-1.55968804158368
75.5	175.5	258.458333333333	13.1658599182166	5.59561625260902	2.95220900582132	-1.69028097663398	-0.996655517357342	-1.54600564118756
75.5	176.5	342.486111111111	13.1408941906726	5.56070367346952	2.97211450305332	-1.69947326039825	-0.839212772077079	-1.63767142776601
75.5	177.5	479.701388888889	13.1147940651169	5.54634824824498	3.00965277314577	-1.69791978922182	-0.784419438624408	-1.74276472574574
75.5	178.5	618.541666666667	13.0748290496173	5.48082155005955	3.08755366782604	-1.72172316695374	-0.795531576274895	-1.68897882041446
75.5	179.5	758.5625	13.0813106304409	5.58092747786146	3.07040589794296	-1.80263734934229	-0.835734062974281	-1.86263466424271
74.5	-179.5	145.576388888889	13.0913109280199	5.45720050290885	2.96974588165861	-1.74587675575732	-0.88492188820211	-1.51364586924935
74.5	-178.5	177.145833333333	13.0408854423271	5.56566898758233	3.00561989634217	-1.73167600135017	-0.95966074833383	-1.67773611551754
74.5	-177.5	202.236111111111	13.0659865480182	5.62918582197876	3.03060107167180	-1.71702882653963	-0.944724392297202	-1.70906955064040
74.5	-176.5	211.048611111111	13.0543653107945	5.5260756078864	3.02268868426532	-1.77606701090305	-0.946874841455218	-1.75371304244769
74.5	-175.5	217.069444444444	13.0750740895763	5.49397354795225	3.00389410257908	-1.75033569137976	-0.953715323195296	-1.78554979688349
74.5	-174.5	223.666666666667	13.0856424980843	5.48036301184362	3.01263260905509	-1.74106850171845	-0.985665451357992	-1.75500279801383
74.5	-173.5	236.333333333333	13.0743173096217	5.45352179786462	3.04114811842521	-1.80685186612537	-1.02362101305325	-1.99053137946887
74.5	-172.5	251.555555555556	13.0649196321609	5.43580893439216	3.02396410176093	-1.79726903163476	-1.15823665651312	-2.15038203182147
74.5	-171.5	243.152777777778	13.0515681635285	5.33264078458883	2.96985146531572	-1.78623040652066	-1.12668728830162	-2.21479559656502
74.5	-170.5	219.034722222222	13.0558694649076	5.16158114871682	2.94610228778373	-1.77543837863776	-1.13111077026869	-2.21263191626430
74.5	-169.5	200.243055555556	13.1302605350345	5.23209388420914	2.97945389948649	-1.78716699638228	-1.17674440250804	-2.15810768145291
74.5	-168.5	200.326388888889	13.1173254247514	5.25776088099988	3.03259016084211	-1.78582423530948	-1.19822427008752	-2.19734198689261
74.5	-167.5	281.319444444444	13.1059319548741	5.18357052251438	3.02038244527833	-1.77754782265681	-1.19227330216224	-2.2775534041203
74.5	-166.5	334.534722222222	13.1307049561582	5.2146140868408	3.01799246356728	-1.76511705880858	-1.12546734274548	-2.23708221641401
74.5	-165.5	352.027777777778	13.1726539466547	5.28860232121557	3.02730806133121	-1.79536957465602	-1.05657458267939	-2.28434061794789
74.5	-164.5	447.506944444444	13.1694832001239	5.35735790169791	3.02200242949774	-1.7623365147603	-0.995798509719736	-2.23357683392054
74.5	-163.5	897.111111111111	13.1574388186912	5.25430207425215	3.00659049228963	-1.95322830708211	-1.02860340971583	-2.37654902375066
74.5	-162.5	1348.20833333333	13.1945106465919	5.08492391571323	2.94632397274277	-1.92951648471499	-1.03394705786666	-2.34339094502085
74.5	-161.5	1496.86111111111	13.1259342027378	5.13894706731529	2.90405131517708	-1.96084251998597	-0.944718711420716	-2.44048238911138
74.5	-160.5	1210.54861111111	13.1583791683735	5.12520128396073	2.90883000743884	-1.90979389241468	-0.906033301383993	-2.24026012857374
74.5	-159.5	1229.59722222222	13.1244460971130	5.08812275692018	2.78386771956942	-1.96723181739971	-0.957469367846798	-2.44213304379199
74.5	-158.5	1570.04166666667	13.0893493422303	5.00403062768968	2.77479989661986	-1.89197956473313	-0.948950429738395	-2.60595234379304
74.5	-157.5	2761.21527777778	13.1328888270481	5.02694554414142	2.87199800179842	-1.90016841658098	-0.934825754630092	-2.73633569663675
74.5	-156.5	3720.29166666667	13.1324889084004	5.00997562698595	2.65129962817689	-1.92775505602569	-0.951547965036366	-2.83314237868773
74.5	-155.5	3762.68055555556	13.1359058791346	4.96720549112003	2.58138872131281	-1.94316745013972	-0.964594089204558	-2.86224336831863
74.5	-154.5	3760.59027777778	13.1408408822322	4.96480898720949	2.5642796666444	-1.94026533559363	-0.991737239309677	-2.92354586485362
74.5	-153.5	3764.95833333333	13.0928182760578	4.96128468559817	2.30161554277705	-1.92927275983058	-1.01803707117135	-2.98591267412449
74.5	-152.5	3745.09027777778	13.1034023873282	4.99211523782049	2.40198721306479	-1.94214225517697	-0.953441068862787	-2.81510481798166
74.5	-151.5	3722.42361111111	13.0949547111684	5.01285577587048	2.35298762482252	-1.93787515672618	-1.02744987034056	-2.88568465722789
74.5	-150.5	3736.90972222222	13.0819826369970	4.86215191226111	2.36320032446708	-1.98659742773875	-1.05966202334150	-2.92749413303456
74.5	-149.5	3733.17361111111	13.0706656307117	4.96403123025054	2.32185041774961	-1.96596825681714	-1.04840565894067	-2.89697522528441
74.5	-148.5	3707.66666666667	13.1335806556936	4.90939210615974	2.44414075816167	-1.97419509405341	-1.05981082708809	-2.73711917787863
74.5	-147.5	3689.74305555556	13.0975395712453	4.888976964152	2.37658067964182	-1.96828958657522	-1.06046675984201	-2.83009538555307
74.5	-146.5	3670.48611111111	13.0824802549545	4.88949876838113	2.41027843568889	-1.97295006185274	-1.05718436819114	-2.88545229774436
74.5	-145.5	3652.82638888889	13.0659402208056	4.86286991217993	2.39424945987977	-1.97644605202287	-1.05560394554207	-2.82277070331463
74.5	-144.5	3632.59027777778	12.9827414772711	4.48269558849189	2.28056914476221	-2.02138458550601	-1.1374296340335	-3.0180054920071
74.5	-143.5	3629.86111111111	13.0190989116118	4.54778672164117	2.29847230602393	-2.01795512263261	-1.14283807690385	-3.04949391637001
74.5	-142.5	3612.76388888889	13.0295885380205	4.84376816357486	2.40776962490728	-2.00224732256453	-1.05776841770002	-2.90136194597697
74.5	-141.5	3587.32638888889	13.0588843476811	4.93395936732660	2.39203226245595	-1.97555026777612	-0.983660116466662	-2.73573575226898
74.5	-140.5	3553.46527777778	13.0654241948910	4.76749961593721	2.38178789202076	-1.97537696756756	-0.963202403122195	-2.32056462765008
74.5	-130.5	2004.61805555556	13.1967472627706	4.88768492145734	2.75987589161542	-2.00036749155285	-0.920122341324972	-2.13767776017877
74.5	-129.5	849.625	13.1918459456773	4.90625496516475	2.89589631524708	-1.97460376152782	-0.811984325896805	-1.69004947129331
74.5	-128.5	374.166666666667	13.2128864643704	5.00361616542446	2.87990955023575	-1.77127687307133	-0.951378633032292	-1.71652332055882
74.5	-127.5	359.513888888889	13.0164420755493	5.04708788884824	2.9748592493419	-1.73939460281911	-1.18369217545238	-1.55043809900895
74.5	-126.5	340.819444444444	13.1634872701050	5.35927673665672	3.06966679539688	-1.78481032314958	-0.990933333401933	-1.50626191599535
74.5	-125.5	300.347222222222	13.1238625810776	5.66937477774786	3.08751977963703	-1.72226192205339	-0.97343326039441	-1.36577282996343
74.5	-114.5	323.354166666667	13.1985648661441	4.9719907712964	2.89631040391227	-1.77953617115981	-0.945181939187542	-1.56727347799546
74.5	-109.5	287.125	13.1299275398153	5.02037523335233	2.91813115229427	-1.82832799708647	-1.19317033533249	-1.53300119629132
74.5	-108.5	290.673611111111	13.1336819936703	5.19343452604113	2.94044780232022	-1.82691415861994	-1.27421647817685	-1.51223505040141
74.5	-107.5	282.652777777778	13.1273282936625	5.06216427223637	2.92518076241195	-1.78890225463929	-1.35423435875699	-1.52116404869049
74.5	-106.5	288.076388888889	13.0955680659478	5.12539958845106	2.8771823382573	-1.79864283069976	-1.43903161933180	-1.79310901435338
74.5	-105.5	311.256944444444	13.0805381085440	5.17627024070153	2.88745338341476	-1.76458920680420	-1.46937594324206	-1.76526416447391
74.5	-104.5	270.881944444444	13.0830532737755	4.99174508348947	2.84962479875329	-1.76629847807116	-1.45095748000891	-1.74874867105149
74.5	-77.5	560.243055555556	12.9693799289941	5.68535023046598	2.95486258888517	-1.6740405089939	-1.22432336384223	-1.42965370813761
74.5	-76.5	593.576388888889	12.9436738941991	5.67205841137288	2.93832060178714	-1.63551534074570	-1.21454460149152	-1.44453532216052
74.5	-75.5	607.666666666667	12.8990171027630	5.64060102194125	2.94864078730603	-1.63894724483288	-1.24181146165711	-1.46339874790876
74.5	-74.5	651.590277777778	12.8871172667875	5.62781465860093	2.94521345111901	-1.63977830737675	-1.27097979911328	-1.45679445873158
74.5	-73.5	754.8125	12.9124706494161	5.61555874553025	2.95483493816111	-1.73473352519317	-1.27526765520841	-1.46019814549684
74.5	-72.5	909.208333333333	12.9553246504502	5.54704057594942	2.96898922061044	-1.78991728241519	-1.22149246673415	-1.48395473789709
74.5	-71.5	1078.82638888889	13.0132959517547	5.50920129598537	2.92335547906442	-1.78380300913593	-1.22896324617132	-1.4924036964708
74.5	-70.5	1307.64583333333	12.9380647007295	5.51826114365184	2.86043697794333	-1.76038941256182	-1.35760771628534	-1.60233288301964
74.5	-69.5	1562.01388888889	12.9509712952342	5.51293101836537	2.82536913650856	-1.80783172987994	-1.27163294866107	-1.52240426078683
74.5	-68.5	1797.84027777778	12.9579245345724	5.52756219839155	2.79355618574714	-1.73606940885976	-1.34916231474769	-1.56377964571298
74.5	-67.5	1907.625	12.9824411837003	5.5367852031571	2.82668171053319	-1.75173850372701	-1.32544519215338	-1.57501721596623
74.5	-66.5	1876.91666666667	13.0213173994686	5.52572440559986	2.82426807835824	-1.75193181709751	-1.31743975370664	-1.68476280527241
74.5	-65.5	1441.24305555556	12.9926162649494	5.46595721102286	2.86640215335849	-1.73330562432026	-1.29369227083514	-1.62584430322539
74.5	-64.5	786.034722222222	13.1191846148373	5.59967798750889	3.00105361744380	-1.82768155120365	-1.1399930163989	-1.52229407599957
74.5	-63.5	431.611111111111	13.1076814681317	5.58901565206776	3.03867244073305	-1.6903235446924	-1.10562851329813	-1.48835674498998
74.5	-62.5	479.6875	12.9844256995286	5.63597854510024	2.99172043515372	-1.66194473404577	-1.25038478356875	-1.56223696916070
74.5	-61.5	649.520833333333	13.0670921787631	5.65554557773026	3.01456944183255	-1.68822198098881	-1.08589678029934	-1.58389275540735
74.5	-60.5	709.784722222222	13.0505800350694	5.5599284903106	3.00231440149811	-1.73222521191478	-1.16199854148895	-1.67375891488828
74.5	-59.5	646.069444444444	12.9876591845797	5.61343348060808	3.04448834530346	-1.67249950094806	-1.29214020437622	-1.73854594022154
74.5	-16.5	284.659722222222	13.0832542498608	5.69488517138852	2.96177240002925	-1.64143442614248	-0.852411265773088	-1.56800360415173
74.5	-15.5	283.993055555556	13.1514527420814	5.68332256261964	2.9840893333631	-1.65751068035263	-0.900522151336407	-1.98530073506342
74.5	-14.5	510.229166666667	13.0943221796601	5.68126933014308	2.95967825196598	-1.66576748176175	-0.781839680863584	-1.73892482888578
74.5	-13.5	1459.20138888889	13.0974282175021	5.66481015629078	2.84042350836096	-1.8685440334874	-0.735053338906412	-1.73951768417289
74.5	-12.5	2300.97916666667	13.0801884363871	5.6318687263146	2.79600449853946	-1.78685550361664	-0.695425115928903	-1.81763609658856
74.5	-11.5	2807.3125	13.2079653188242	5.63177410187736	2.78666949451067	-1.78844843653108	-0.716053125425336	-1.83873368335392
74.5	-10.5	3075.20833333333	13.3047944253729	5.6277915393667	2.75632389881757	-1.79759053591702	-0.657570243728012	-1.80800858081274
74.5	-9.5	3197.70833333333	13.2329170430961	5.57483505507623	2.75149884893448	-1.83956067580613	-0.615154743980412	-1.87104604325148
74.5	-8.5	3260.88888888889	13.2643830125488	5.57983854141562	2.75629337141336	-1.84852078002904	-0.609493251869046	-1.94814805178412
74.5	-7.5	3333.31944444444	13.2303837023550	5.59684873353545	2.76302769323840	-1.86278162472690	-0.550352983722926	-2.06940674209037
74.5	-6.5	3403.02083333333	13.2229579787877	5.60983124137979	2.75726645808283	-1.87727030830520	-0.540327913982371	-2.09711023044735
74.5	-5.5	3498.24305555556	13.1255161287854	5.63024449962543	2.73002391540877	-1.85297658768614	-0.491428368964413	-2.00320017648415
74.5	-4.5	3520.51388888889	13.1122933075836	5.64040627920331	2.72006733814083	-1.88404879894023	-0.490220746082754	-2.08739453202357
74.5	-3.5	3552.38888888889	13.0715286060416	5.64659335575536	2.71012961776857	-1.88965841255235	-0.470222289320374	-2.0921476318438
74.5	-2.5	3582.5	13.0367596181592	5.62129668961851	2.73163774292783	-1.89161529295105	-0.563121842936658	-2.39363646808938
74.5	-1.5	3484.39583333333	13.0286195197252	5.60676616925788	2.74471918633485	-1.89787927217162	-0.56983577388151	-2.45746628671933
74.5	-0.5	3497.38888888889	13.0039568409466	5.62909768669252	2.74106032522046	-1.85457497427674	-0.625169879207766	-2.03970313722125
74.5	0.5	3472.84027777778	12.9993075543842	5.61306480781064	2.7567693929509	-1.92667355275150	-0.617890493085829	-2.02566934640325
74.5	1.5	3487.60416666667	13.0153333730967	5.60003594909555	2.76185857846921	-1.93833726455899	-0.679015946540762	-2.58252246753715
74.5	2.5	3374.05555555556	12.9862318880596	5.58239847835573	2.78660709812219	-1.9276948206755	-0.882943313185632	-2.69459551588186
74.5	3.5	3240.72222222222	12.9599255732373	5.57647326872166	2.79389914736347	-1.91641062444941	-0.897110842359035	-2.55997258985831
74.5	4.5	3149.58333333333	12.9053038377988	5.49427755923061	2.78576692319219	-1.90729633923856	-0.998679546343444	-2.57122206428576
74.5	5.5	2933.52777777778	12.9200027949368	5.44520533728886	2.80339576942934	-1.92102987868788	-1.00649949702349	-2.55574307978063
74.5	6.5	2518.35416666667	12.9349359206474	5.48025967291914	2.72054623318881	-1.89928751903188	-0.972779686299131	-2.53237601050578
74.5	7.5	2219.11111111111	12.9155563598261	5.62909256059387	2.76072062444247	-1.91542935923575	-1.01084042509874	-2.50078738514435
74.5	8.5	2788.73611111111	12.8809105610451	5.64122426138638	2.72746838675326	-1.90180046362433	-1.02811099214687	-2.50812190247882
74.5	9.5	2488.59027777778	12.8922335493796	5.66866589191159	2.73081892857310	-1.89275619390634	-1.01281652075503	-2.46799937527176
74.5	10.5	2412.25	12.9004295007261	5.67216219147549	2.74220911822971	-1.86829192141170	-1.03236834347375	-2.52377307705693
74.5	11.5	2324.84722222222	12.8627500649291	5.69660809909086	2.75792565541491	-1.81597820215190	-0.990616891725922	-2.51889802565153
74.5	12.5	2199.66666666667	12.8800313816815	5.67390199144726	2.80318706675429	-1.78057676684376	-0.990798592330156	-2.69963423863318
74.5	13.5	2038.95833333333	12.8724311770704	5.73751117420854	2.81523434061238	-1.73083247223285	-0.940952029785168	-2.53928496288696
74.5	14.5	1762.80555555556	12.7637389183054	5.80252959368055	2.8297266338639	-1.59031519184373	-0.898706992978417	-2.55939290711199
74.5	15.5	1129.11805555556	12.8391548097023	5.85573101945418	2.86733456702939	-1.52094222752893	-0.641197746766172	-1.98690926048114
74.5	16.5	335.347222222222	12.8921348134818	6.01498062937125	2.96303704134444	-1.34929628569655	-0.743954232691969	-1.72811332502471
74.5	17.5	185.125	12.7722559469233	5.94407066000652	2.96590574016123	-1.46434944360732	-0.943414258553576	-1.67363979740146
74.5	18.5	99.2361111111111	12.7771584968584	5.91399491895058	2.96794651616543	-1.55886906316307	-0.90876644836649	-1.49835655864942
74.5	19.5	64.6736111111111	12.7785727315169	5.93939184296186	3.05959773202089	-1.56194996913806	-0.906114174585291	-1.40836829331835
74.5	20.5	109.298611111111	12.7198780829747	5.90852839804582	3.08893791776088	-1.59265906336291	-0.922295833386796	-1.42389325087658
74.5	21.5	162.375	12.7465284665215	5.91668140283335	3.10845767914412	-1.60318492995374	-0.953776410394063	-1.45908830177364
74.5	22.5	182.395833333333	12.6617515006976	5.92938449595185	3.07631949758499	-1.56770775579972	-0.915603435659096	-1.58966600444652
74.5	23.5	235.159722222222	12.6923935069556	5.97999019008373	3.07363294215057	-1.59575335439059	-0.917525353140908	-1.70477595614460
74.5	24.5	284.631944444444	12.6256284373420	5.96910863829707	3.01742503591391	-1.57131214764562	-0.85857445648973	-1.70636672165638
74.5	25.5	325.520833333333	12.6353407924889	5.98410226155744	3.01533837163468	-1.55384101030913	-0.93339440208913	-1.72467444583898
74.5	26.5	355.319444444444	12.6014978075213	5.97533347876512	2.97562231508281	-1.50239756514444	-1.06604051651956	-1.77754790127141
74.5	27.5	370.458333333333	12.6099950203510	5.96768616929635	3.00375707024215	-1.50289642323733	-0.993976029447576	-1.79980126676495
74.5	28.5	372.083333333333	12.6524498112029	5.94258697449369	3.02799242305065	-1.55204987426007	-0.786735610768594	-1.76486815541175
74.5	29.5	368.291666666667	12.7371165614068	5.9357188278178	3.01498663165486	-1.55446942563806	-0.82026476326818	-1.81514132044205
74.5	30.5	332.979166666667	12.7511854349773	5.90514852084408	3.01272513117091	-1.59817273623523	-0.862512266517054	-1.82531229791216
74.5	31.5	262.923611111111	12.7450837983236	5.91839660364602	3.00130683275332	-1.63531620229334	-0.905971869134397	-1.76451922265016
74.5	32.5	218.868055555556	12.7461337343442	5.90564159811337	3.01335024304323	-1.64614996293411	-0.888396404915712	-1.73915636542235
74.5	33.5	246.354166666667	12.7565532762555	5.90033945260325	3.04821864895572	-1.66022324947885	-0.870013937579755	-1.72802981679798
74.5	34.5	258.527777777778	12.7553900025176	5.89879529195919	3.03548566053642	-1.65924935841269	-0.86778741293947	-1.72540740372417
74.5	35.5	249.215277777778	12.7542907070130	5.89491142946247	3.03630431889531	-1.65696559836229	-0.886891223820397	-1.68175343987962
74.5	36.5	226.145833333333	12.7911083267648	5.88260741672652	3.08196992183072	-1.64861243843348	-0.927819311418803	-1.64072531482121
74.5	37.5	197	12.7913981269469	5.85510151513086	3.06566270889941	-1.63052376752742	-0.976295835648037	-1.74460243419217
74.5	38.5	179.826388888889	12.8513466441434	5.81295390553793	3.01280381205395	-1.66283664697175	-1.20952006390722	-2.22865827776485
74.5	39.5	183.756944444444	12.8738745213529	5.7413401170036	2.97927923941223	-1.64280430458571	-1.36714067058181	-2.28938917310457
74.5	40.5	198.680555555556	12.8567837720431	5.73758269880127	2.97512021919492	-1.63564990482640	-1.36912226263562	-2.26936211065085
74.5	41.5	211.972222222222	12.8397150824666	5.7198452311834	2.98672118259217	-1.65333921643849	-1.29360590666427	-2.29962363041621
74.5	42.5	244.868055555556	12.8384102260181	5.80461436632734	2.99531996107131	-1.67504098806956	-1.25547921484246	-2.33134335431325
74.5	43.5	297.590277777778	12.8218856084664	5.81407696747642	3.01421278971617	-1.66175154086051	-1.21352422669726	-2.28086103853577
74.5	44.5	310.652777777778	12.8627097981255	5.82917291718392	3.04011144519977	-1.68914691278947	-1.11477511845723	-2.22807889161228
74.5	45.5	293.506944444444	12.8474773349940	5.80206187993774	3.03725909328878	-1.70423400341855	-1.10779336893306	-2.32256484853569
74.5	46.5	241.722222222222	12.8325527937348	5.78669797785295	2.99503923785204	-1.71480906352865	-1.21789493260020	-2.38339876916709
74.5	47.5	237.458333333333	12.8905152232074	5.67857728475873	2.99061487675972	-1.68481551998343	-1.22653171792962	-2.30281245864584
74.5	48.5	214.701388888889	12.8419140038500	5.61401853978563	3.00481427584405	-1.67563578032410	-1.16094868537791	-2.30264999530965
74.5	49.5	170.076388888889	12.8646936902275	5.64265382324334	2.99818469902689	-1.70600148703451	-1.15720340754271	-2.30989943996685
74.5	50.5	154.180555555556	12.8697508636703	5.5862439726657	2.9844729927471	-1.68271347400666	-1.19510891238533	-2.07798162856274
74.5	51.5	174.409722222222	12.8583899181351	5.53378776880198	2.975263438042	-1.67955407022297	-1.27413014373596	-2.25933997057914
74.5	52.5	193.388888888889	12.9458928087309	5.5928131746127	2.9802890607614	-1.68631121979372	-1.31109232803210	-2.25150038999516
74.5	53.5	181.791666666667	12.9415464008781	5.72009604146832	3.03247040844637	-1.72153717072633	-1.33951455176138	-2.25307346980517
74.5	64.5	93.0486111111111	13.3502385442391	5.88217954797328	3.06242733687386	-1.63280989771111	-0.964985111800534	-1.23128741953247
74.5	65.5	121.993055555556	13.3037194462023	5.87568297394622	3.07587307210698	-1.62765765579503	-0.996414514602541	-1.29966327530703
74.5	66.5	120.451388888889	13.3337590590812	5.87672372016167	3.12825342599555	-1.63008677017117	-0.951437913644055	-1.28362092042572
74.5	67.5	95.7847222222222	13.3301043721160	5.86317523868066	3.18294198055553	-1.63765941504861	-0.869193523916369	-1.21473105519872
74.5	68.5	78.2847222222222	13.3697088079701	5.89131232372094	3.19540053957821	-1.66451029252778	-0.926180591269984	-1.20730511273356
74.5	69.5	30.9097222222222	13.3824277185195	5.86523776105859	3.1322571685938	-1.62187251537658	-0.929304046559475	-1.1933879798966
74.5	70.5	22.9375	13.3806946506757	5.88027061829564	3.09967419889879	-1.61019100430872	-0.85727336178448	-1.18242182458459
74.5	71.5	22.3472222222222	13.3779692719493	5.87487956079382	3.12633551174108	-1.60657905571392	-0.865040278423816	-1.15031817009880
74.5	72.5	23.4722222222222	13.3742926702623	5.87451444814302	3.14058328235205	-1.6010485370127	-0.895688459869974	-1.14806567233253
74.5	73.5	22.0902777777778	13.3668511162736	5.88176534595552	3.14675724276897	-1.60694399668843	-0.891080130793981	-1.18412342220203
74.5	74.5	23.6875	13.2797017986127	5.8442746677671	3.16809534436157	-1.63079850304674	-0.938485932961444	-1.18816135733460
74.5	75.5	26.9305555555556	13.2748659102216	5.8647187140833	3.15143667590096	-1.62056329558540	-0.961759928669481	-1.18831270082237
74.5	76.5	30.2986111111111	13.2672401247562	5.86412936271475	3.15507242959278	-1.62162717597539	-0.956570835915664	-1.19568402215580
74.5	77.5	32.2430555555556	13.3157312131761	5.84120381506292	3.13184252288102	-1.61745955153858	-0.945634577631416	-1.22082094147984
74.5	78.5	28.9652777777778	13.3100105854214	5.84899186610406	3.0786897741723	-1.60419518828428	-0.934251823785247	-1.20571776514697
74.5	79.5	20.3541666666667	13.3105191677032	5.86334762987814	3.05907908725269	-1.62914150631991	-0.897963433592233	-1.18872823720492
74.5	81.5	35.5763888888889	13.3918886798345	5.87238580693105	3.06908835498550	-1.63086991133593	-0.911235724015328	-1.15751666285992
74.5	82.5	30.0763888888889	13.3794347790212	5.8644094995523	3.10544188430193	-1.60502327130284	-0.904200184680726	-1.13649155318984
74.5	83.5	34.375	13.4148483317845	5.82521931764971	3.09977022370601	-1.62956601249183	-0.85433368957947	-1.17142775403066
74.5	84.5	23.6180555555556	13.4087818531558	5.92357833247812	3.0629685301271	-1.61334396502265	-0.90866617454946	-1.18481885651072
74.5	117.5	15.0416666666667	13.4698931221979	5.84419908344935	3.14640552841488	-1.65502555852401	-0.86208871279543	-0.930088258680731
74.5	118.5	15.8680555555556	13.4677219577141	5.83632813666808	3.18018156246408	-1.65457566190534	-0.858915569062114	-0.936804492950247
74.5	119.5	21.9652777777778	13.4623079857641	5.83240307764564	3.18748497898016	-1.66226739107519	-0.893114384952009	-0.937822288314433
74.5	120.5	18.3055555555556	13.4670340906868	5.83546830705993	3.15745219747006	-1.65978827040317	-0.892668810969015	-0.937348490233416
74.5	121.5	14.8055555555556	13.4467078012034	5.8373590897598	3.13012138604575	-1.66471468969252	-0.877725846483561	-0.944320316943189
74.5	122.5	15.5347222222222	13.4285271243467	5.8439169426397	3.12750815465759	-1.66691528496018	-0.836028640740717	-0.940086950281886
74.5	123.5	19.8819444444444	13.4266914900883	5.8423224420972	3.14074113470284	-1.66686694198575	-0.863149223170575	-0.937597637097487
74.5	124.5	27.0902777777778	13.4266517275052	5.83554693294926	3.13917499035908	-1.6667535021762	-0.896478302932736	-0.93993566912075
74.5	125.5	28.9513888888889	13.3976833614581	5.83153495199165	3.15895594759991	-1.66472900704851	-0.919445087546436	-0.936626400636332
74.5	126.5	29.3958333333333	13.4402987248105	5.81705639806237	3.18916687103917	-1.66506132673543	-0.92855598300767	-0.965412028775296
74.5	127.5	31.8888888888889	13.3226163911369	5.81829976633891	3.183005276614	-1.66682053819532	-0.916210827059489	-0.98765677735538
74.5	128.5	31.0138888888889	13.2828626818020	5.79765990333313	3.20378008764329	-1.67433104872308	-0.95784695107962	-0.974146088336988
74.5	129.5	25.1180555555556	13.4221043494536	5.80797435536966	3.19133784337817	-1.66214628427778	-0.95821044410954	-0.955024446524193
74.5	130.5	25.8472222222222	13.4313051584873	5.80433741817053	3.15647073937108	-1.67072528089009	-0.934437976142929	-0.968461272126384
74.5	131.5	19.375	13.4049057527533	5.79825708901987	3.15713885404259	-1.66327435967017	-0.947939313920848	-0.962034445366825
74.5	132.5	13.6527777777778	13.5136425378027	5.818673596479	3.17054607975186	-1.65781830463420	-0.92061902750159	-0.949054063546337
74.5	133.5	12.5277777777778	13.4637393360298	5.83342071000644	3.08931837730328	-1.65660171669948	-0.871810014997828	-0.953430595446093
74.5	134.5	17.3194444444444	13.4527181545687	5.83904301566949	3.12051566748865	-1.65375951794431	-0.902219907185872	-0.961576725577685
74.5	135.5	23.6180555555556	13.4996895891210	5.8944820390172	3.11585371863852	-1.64735331634901	-0.984905207579233	-0.981128572060524
74.5	136.5	22.2291666666667	13.4875856923296	5.9063716172257	3.14282445316523	-1.64541571775505	-0.983583961404944	-0.9669890422813
74.5	144.5	12.5972222222222	13.3361002596011	5.87724016957228	3.00851056745161	-1.67350839752918	-0.910743195371996	-0.945212620697892
74.5	145.5	12.9444444444444	13.3538025062562	5.87124075527173	3.00872556227347	-1.67846089615480	-0.911040352808751	-0.941380730227889
74.5	146.5	12.2013888888889	13.3551339798874	5.86541061831818	3.02024263017739	-1.67958252357438	-0.912088439542243	-0.939389258582276
74.5	151.5	11.5902777777778	13.404379976511	5.83197694221229	3.01953056484593	-1.70253753987430	-0.820351235355146	-0.934251864768445
74.5	152.5	13.6388888888889	13.4211745284800	5.83176770234996	3.02741896834004	-1.68547015474466	-0.83477601877686	-0.951110670290634
74.5	153.5	17.2708333333333	13.3841274823250	5.86349674243026	3.05636606290950	-1.65870368184176	-0.780012594023094	-0.9625810439128
74.5	154.5	20.2847222222222	13.4044485512978	5.85948132437779	3.02634094689766	-1.66158749010195	-0.804642244161956	-0.97370929554439
74.5	155.5	27.0972222222222	13.2940590897421	5.83838671114595	3.00005896880607	-1.69069092407912	-0.733146723808186	-0.99495765399282
74.5	156.5	36.5347222222222	13.2483589988099	5.83968310187069	2.93922199856144	-1.69801068261711	-0.707251374679119	-1.06989995795444
74.5	157.5	38.2708333333333	13.2616828913868	5.8214666575734	3.01247501478211	-1.63930752442741	-0.818759555064224	-1.05186500545067
74.5	158.5	37.5972222222222	13.2828230037309	5.8299642021518	2.97287152974043	-1.62847062359625	-0.835976540963365	-0.98873415550844
74.5	159.5	38.8888888888889	13.2954922707089	5.78799257616458	2.95372175044389	-1.65202386921556	-0.885955113183424	-1.13411027993309
74.5	160.5	40.8611111111111	13.2666396213885	5.74546408566671	2.96342604683755	-1.65311900398924	-0.928919556780865	-1.26296871204777
74.5	161.5	42.8541666666667	13.2084062798808	5.74502660443688	2.96507844463751	-1.67197060290071	-1.08074896553869	-1.58053214883125
74.5	162.5	44.3680555555556	13.2438874791422	5.7418619297909	2.97740468063414	-1.62848734469205	-1.00028136666811	-1.55911021507215
74.5	163.5	45.7430555555556	13.2293741870349	5.7114780075751	2.98143346995066	-1.62530454687158	-1.13458008259644	-1.57959893827269
74.5	164.5	47.2013888888889	13.2183134909859	5.49719578456797	3.00310786795645	-1.70186848093472	-0.958722749178176	-1.55797907498775
74.5	165.5	48.7916666666667	13.1605062077687	5.44748559668025	2.97331658813021	-1.70665358111134	-1.07861166279295	-1.64144144839522
74.5	166.5	51.3680555555556	13.1329106474308	5.44613288092073	2.94319769096017	-1.69733282773978	-1.115531322916	-1.65528624977028
74.5	167.5	51.6944444444444	13.1217793668801	5.566800269431	2.9671804964994	-1.62711972827216	-1.08853611317404	-1.61880581666740
74.5	168.5	53.0138888888889	13.1007854476276	5.35141953346795	2.9291341231525	-1.73468103144782	-1.11879306265880	-1.68725905340337
74.5	169.5	54.1388888888889	13.1161138022711	5.44385269120282	2.88599952257824	-1.69167667621739	-1.08928014341502	-1.65677671771810
74.5	170.5	56.0069444444444	13.1493828407912	5.52003782384489	2.84760843787165	-1.70358804329837	-1.01622167513437	-1.38434232320692
74.5	171.5	59.3125	13.1728395607500	5.626652876072	2.84940055928196	-1.63461473671214	-1.01471876963096	-1.3283483484363
74.5	172.5	62.9861111111111	13.1618688978329	5.64250184391578	2.84110409282609	-1.64098832649685	-0.973180225836185	-1.24083545129613
74.5	173.5	62.4861111111111	13.1711477389016	5.64075729953604	2.83709844698631	-1.64878415718587	-0.895821653295514	-1.22900722179530
74.5	174.5	67.0486111111111	13.1614995237620	5.6280748262015	2.85906015266276	-1.64887828513137	-0.865269922560808	-1.24092473764575
74.5	175.5	78.6319444444444	13.1586618896787	5.65132349854242	2.83936410708642	-1.67309248215309	-0.856822715173546	-1.23760024249704
74.5	176.5	92.3888888888889	13.1423693040614	5.72725736382312	2.96579922038112	-1.64214370931360	-0.807407256527774	-1.27484411391416
74.5	177.5	103.409722222222	13.0969500785099	5.68117630037925	2.96422765075512	-1.64413897192141	-0.693924790041601	-1.33412817662409
74.5	178.5	112.229166666667	13.1068256543850	5.65843121718732	2.95043766612812	-1.67009553150229	-0.832528341522885	-1.32909182331940
74.5	179.5	128.645833333333	13.0916716892654	5.63262549228666	2.97614683282904	-1.65263244706736	-0.83607027347157	-1.40020475518403
73.5	-179.5	87.125	13.0122103411606	5.58442292177594	2.94243307864621	-1.65957376280663	-0.924566896884276	-1.49435474834498
73.5	-178.5	95.1111111111111	13.0108609214552	5.60364871032873	2.9550233279368	-1.66986513511327	-0.971293710274452	-1.4267982012735
73.5	-176.5	123.208333333333	13.0099891388391	5.57508256904193	2.95500758689947	-1.69508064789402	-1.00816293888650	-1.49049795250169
73.5	-175.5	150.034722222222	13.0299872179513	5.46742419412393	2.93827636322134	-1.74363745830550	-0.866377255232216	-1.50624010893138
73.5	-174.5	142.118055555556	13.0293213596321	5.4561349763555	2.91967061561057	-1.7706855943062	-0.917720810328581	-1.51756956790732
73.5	-173.5	132.791666666667	13.0078368168906	5.46480161243232	2.89751765876201	-1.76650681991561	-0.96238194648542	-1.52239521413535
73.5	-172.5	132.541666666667	13.0224161352343	5.49529983384675	2.90659293319597	-1.76554963143468	-0.958729122240125	-1.52404674911676
73.5	-171.5	124.048611111111	13.0191749618608	5.56197073033619	2.91255046203207	-1.74914656120269	-0.940803394066123	-1.51001984641446
73.5	-170.5	122.319444444444	13.0087195204298	5.54713937299659	2.89031875419028	-1.74878093706552	-0.92997179194612	-1.4973275547564
73.5	-169.5	125.069444444444	13.0203846756196	5.49875910935928	2.87612907401113	-1.75768951529617	-0.918240977177965	-1.50751964437309
73.5	-168.5	122.159722222222	13.0884839406565	5.51560352170262	2.93460618716757	-1.74646044785761	-0.920809470586687	-1.51481982622896
73.5	-167.5	118.916666666667	13.1177984595449	5.37774044989078	2.93038752694697	-1.77283823594262	-0.913829301899844	-1.55858822296207
73.5	-166.5	97.1388888888889	13.1395376949747	5.39959919200516	2.94424134188699	-1.77375232699304	-0.921098497092366	-1.41537195832028
73.5	-165.5	98.3888888888889	13.1349266333789	5.44482325880554	2.95124015307042	-1.75636405723535	-0.931579951905993	-1.35282159835704
73.5	-164.5	119.847222222222	13.1340957908582	5.337145946521	2.99724224195133	-1.76451439584806	-0.943909992343704	-1.42365757149930
73.5	-163.5	143.854166666667	13.1273219266387	5.31280202573973	3.06611500110036	-1.77180562242610	-1.01760348684023	-1.42508408708029
73.5	-162.5	177.944444444444	13.1460421115359	5.28847316623474	3.05465868421468	-1.80984221229186	-1.03015453373983	-1.60793611524245
73.5	-161.5	338.375	13.1720457024879	5.22955675375756	3.00703970601442	-1.78749450413313	-0.89313906737499	-2.16083807129453
73.5	-160.5	1076.6875	13.1167757790358	5.232461123814	2.95699266342613	-1.95316619172984	-0.825425631172424	-2.23735298488971
73.5	-159.5	1771.67361111111	13.1474820943312	5.23755158303096	2.96933316993182	-1.92513495539254	-0.88306398503185	-2.37240501525
73.5	-158.5	2439.06944444444	13.1531059459088	5.25973951830952	2.96747553454498	-1.93253313184939	-0.831988748719804	-1.94428526416427
73.5	-157.5	2968.36805555556	13.1742135185582	5.22599848416384	2.99027801245144	-1.92526206640789	-0.945941391078378	-2.68818843955304
73.5	-156.5	3342.27083333333	13.1562309042692	5.13036466702962	2.86881612975681	-1.93517083512050	-0.960444387221865	-2.81910278042417
73.5	-155.5	3566.19444444444	13.1262141830246	5.07926758623634	2.72091687395798	-1.94513774597445	-0.93427062697841	-2.87190574099401
73.5	-154.5	3685.11111111111	13.1551962165887	5.11756718222805	2.71228868415646	-1.94370584113657	-0.942720830368076	-2.66464911233574
73.5	-153.5	3740.06944444444	13.1553075347204	5.1295399023338	2.73617601124440	-1.95102644044061	-0.953540643845207	-2.61144377925006
73.5	-152.5	3746.60416666667	13.1584221011164	5.11684834647351	2.71307445658187	-1.95160390251458	-0.941090345310218	-2.62885874871150
73.5	-151.5	3734.6875	13.1445330538307	5.06697708556256	2.66914391640839	-1.94545716610969	-0.959378037290275	-2.65599368544966
73.5	-150.5	3720.18055555556	13.1261368806686	5.08287961151423	2.49762936559105	-1.97731760894938	-1.03283289257053	-2.76686025727852
73.5	-149.5	3708.89583333333	13.1245520350396	5.09855359523781	2.53145609269406	-2.00633324120029	-1.02124737901276	-2.74362425506503
73.5	-148.5	3671.23611111111	13.2067877519028	5.21425425938854	2.71649301820219	-2.00781173286953	-0.983854667025614	-2.56067684790386
73.5	-147.5	3650.32638888889	13.2065792827996	5.24909099596543	2.76414646777232	-1.97931974755738	-0.97591339127341	-2.43958025125337
73.5	-146.5	3616.32638888889	13.2221819997049	5.31030145897357	2.78775592162932	-1.96008377702402	-0.981377393579209	-2.41531442002133
73.5	-145.5	3589.86805555556	13.1791743053303	5.30048008710585	2.89266259680690	-1.96991641565768	-1.02312760710776	-2.33685074550225
73.5	-144.5	3575.59027777778	13.0916367812762	5.09664034955611	2.66771247666143	-2.01158257358523	-1.10601392239239	-2.66688417496196
73.5	-143.5	3545.72222222222	13.130630581141	5.04379159933404	2.64217148671004	-2.01853622780758	-1.09319482622957	-2.70144294362727
73.5	-142.5	3487.42361111111	13.1484116722271	5.03596628042343	2.69369268017896	-1.94268537657304	-1.01754355663640	-2.69892775828871
73.5	-141.5	3464.17361111111	13.1086142957513	5.00492123972008	2.57869500846898	-1.93442967981813	-0.995280641207116	-2.78142068703005
73.5	-140.5	3413.65277777778	13.1246349561475	4.96666415325568	2.57602166093916	-1.93673982170287	-1.01432956218097	-2.75898462052307
73.5	-139.5	3323.95138888889	13.1190945081420	4.85599495529334	2.42750421312156	-1.95533825589927	-1.0583048837725	-2.90614019640911
73.5	-138.5	3228.16666666667	13.0392517828575	4.87602639138218	2.36026758517292	-1.95629999389696	-1.15253373609444	-2.80041040729731
73.5	-137.5	3148.15972222222	13.0541387840619	4.87125068052845	2.53029235047569	-1.95903399287225	-1.12147890621376	-2.77329977712815
73.5	-136.5	3090.78472222222	13.0308589628774	4.96929169909325	2.60739910417101	-1.96887800382879	-1.09922951989822	-2.62449059376602
73.5	-135.5	2983.20833333333	13.1001608864853	4.92238657579981	2.55228440243943	-1.98418242746785	-0.925049916481491	-2.65156680091869
73.5	-134.5	2871.83333333333	13.0784454624439	4.85025787553726	2.51872849597656	-2.01273447121648	-1.04978398294208	-2.40385025831211
73.5	-133.5	2768.25	13.0738129133163	4.92970429007792	2.77677160039093	-2.02093741924313	-1.05866452754985	-2.07680845356395
73.5	-132.5	2682.02083333333	13.0813854448012	5.36387639508347	2.95009390172923	-1.92320294358227	-0.967599393728708	-1.53193979048336
73.5	-131.5	2538.09027777778	13.1380215466634	5.09934673648098	2.90030843059999	-2.00035115913166	-1.01738104543113	-1.69926612454938
73.5	-130.5	2077.84027777778	13.0428310482613	4.91704946792975	2.83692749967337	-1.96475471870617	-1.03464512658703	-2.02491068747911
73.5	-129.5	958.618055555556	13.1021626271052	5.00730377999136	2.91723551315395	-1.99406477408459	-1.08301918212012	-1.75560032431636
73.5	-128.5	369.423611111111	13.1694326040542	5.0511569121092	2.90655261348182	-1.74231929078415	-1.09749190578555	-2.17317874900564
73.5	-127.5	196.701388888889	13.1845446572109	5.11740882868401	2.99294119764196	-1.79124879152095	-0.999931895687996	-1.54187834944151
73.5	-126.5	107.201388888889	13.1413830444658	5.45255135796044	2.98406020905885	-1.76854641130827	-1.04446548582635	-1.20079327083978
73.5	-113.5	246.069444444444	13.1325262491891	5.00698698490123	2.91427402877523	-1.81662554803066	-1.20418131389853	-1.53240863209564
73.5	-111.5	245.666666666667	13.1330952964726	5.04736310653397	2.88637709372960	-1.81637790130729	-1.27164202055498	-1.61086359664212
73.5	-110.5	196.305555555556	13.1302450185646	5.02096210228692	2.90035516023972	-1.79991444515372	-1.26965147348235	-1.54384312320482
73.5	-109.5	176.201388888889	13.1215640861521	5.04207716142874	2.89290375435951	-1.78912763828030	-1.31106730208460	-1.49986592289187
73.5	-75.5	867.673611111111	12.9184314934590	5.63217597097267	2.91678800538858	-1.76469754966329	-1.25941738716430	-1.56247757710015
73.5	-74.5	907	12.8932089739736	5.57336014372376	2.91057888803657	-1.79492887966543	-1.31823847937163	-1.52914797149018
73.5	-73.5	885.583333333333	12.8738694080993	5.49197389686335	2.93828746119924	-1.7854973920139	-1.26505272986729	-1.52659819949504
73.5	-72.5	1004.89583333333	12.8972005703266	5.51620540769616	2.97051862452824	-1.76106543278774	-1.35674835124047	-1.49576986980105
73.5	-71.5	1168.73611111111	12.9094663829550	5.49207300874342	2.91089864114302	-1.72062800671343	-1.31113691468861	-1.47743239206483
73.5	-70.5	1470.36111111111	12.981558111099	5.47273995841084	2.85761941264337	-1.74020295108778	-1.23055077556816	-1.48585808116951
73.5	-69.5	1839.02777777778	12.9329309466465	5.45840989741697	2.82280013303582	-1.74258136995801	-1.34431981140913	-1.55372403063063
73.5	-68.5	2116.02083333333	12.9328494117959	5.46251383276311	2.80160145340387	-1.75487116229766	-1.35416096081979	-1.59183347379578
73.5	-67.5	2268.33333333333	13.0187555862932	5.4292406911885	2.79126000506611	-1.77130701479063	-1.35415022162816	-1.75961958480957
73.5	-66.5	2329.48611111111	13.0525823296723	5.47290863257926	2.82161879177035	-1.74176258853665	-1.2929623350287	-1.7608095033395
73.5	-65.5	2255.24305555556	13.0552345877543	5.47931655486792	2.8358838071857	-1.73914000233021	-1.28757543744207	-1.65002873024331
73.5	-64.5	1660.60416666667	12.9952741612853	5.54017309525779	2.86564473610108	-1.75500960483651	-1.27958593077387	-1.56829124409733
73.5	-63.5	966.194444444444	13.0350202717896	5.58125998373978	2.95496676386744	-1.8242564474275	-1.22640697428428	-1.59944017462908
73.5	-62.5	690.298611111111	13.0515861002415	5.64846193980412	3.01524380181896	-1.68982631713665	-1.23989366949140	-1.63693916823091
73.5	-61.5	483.173611111111	13.0242149447744	5.66781796199455	3.02955399071401	-1.63152492045722	-1.29063996654376	-1.62553915635605
73.5	-60.5	410.729166666667	13.0729000534933	5.64888495204491	3.03041305986428	-1.67695790272407	-1.17939477748919	-1.66076579154033
73.5	-59.5	352.951388888889	13.0206813386590	5.71885275147024	3.19072754427335	-1.66159929944652	-1.38799789353304	-1.97712943560457
73.5	-58.5	490.777777777778	13.0385304876254	5.78608067311409	3.23506350192255	-1.64307149114260	-1.28866940018694	-1.70870956187949
73.5	-17.5	260.708333333333	13.0996451603768	5.77001843610353	3.03206783284619	-1.65499717014264	-0.878189339653345	-1.69674426498917
73.5	-16.5	472.604166666667	13.1339171433641	5.69785165220437	2.95129864719477	-1.53563887224433	-0.76229797205641	-1.68284599298783
73.5	-15.5	1408.79861111111	13.1034017317105	5.66153032243657	2.85898067462908	-1.88629672116154	-0.738036807374062	-1.80909872834439
73.5	-14.5	2174.20138888889	13.0692516349410	5.63168614573945	2.80604061410352	-1.86165984543447	-0.614970793130496	-1.85859333344942
73.5	-13.5	2530.34027777778	13.2272992712718	5.60219627168588	2.73923216781247	-1.85721557500757	-0.58913755084909	-1.75699946381432
73.5	-12.5	2706.57638888889	13.1725618353791	5.62772069847604	2.78036862952421	-1.84884949074660	-0.58361038473453	-1.88521841091020
73.5	-11.5	2821.15972222222	13.1666204260053	5.62112199072355	2.77784709816307	-1.80745669383566	-0.51522758396554	-1.88579586068925
73.5	-10.5	2897.94444444444	13.2095888405962	5.58923225538415	2.75278537774389	-1.83893791388587	-0.442588545273213	-1.91728295143881
73.5	-9.5	2791.15972222222	13.2040516281602	5.60162446284524	2.81588314006105	-1.85988061849918	-0.563378940147008	-2.35834949199058
73.5	-8.5	2949.98611111111	13.2021335445714	5.54055571106024	2.77109760489066	-1.87117317820773	-0.872899485081204	-2.54914576143357
73.5	-7.5	3066.57638888889	13.1372609892059	5.55252917232397	2.77654405161513	-1.87107231951663	-0.971572178930788	-2.49862954653145
73.5	-6.5	3112.375	13.1235348455012	5.55644412841128	2.7596489131588	-1.8704834039456	-0.876736384194329	-2.56076274101636
73.5	-5.5	3102.03472222222	13.0336489192299	5.55948555130126	2.76997109917951	-1.87109839029205	-0.867282444575019	-2.56938323808434
73.5	-4.5	3094.28472222222	13.0146538939037	5.50611846734298	2.75930767019450	-1.88816891460475	-0.839154214794104	-2.57769923974722
73.5	-3.5	3024.11111111111	13.0075842992531	5.48058309042544	2.75216565333392	-1.88208589932121	-0.845027835472044	-2.56831063921591
73.5	-2.5	2996.85416666667	12.9833518885371	5.4454685589798	2.68327749672163	-1.90520931562506	-0.888169676453907	-2.60303397776589
73.5	-1.5	2998.63194444444	13.0063121023536	5.4475753118487	2.70616060078086	-1.88724257670543	-0.900084538452073	-2.60532911348938
73.5	-0.5	2916.65972222222	12.9754846770836	5.47820829144186	2.76454303946988	-1.86296987341021	-0.846817983081697	-2.63616254639504
73.5	0.5	2945.875	12.9632724428630	5.46554216626685	2.76798918028184	-1.92093092008976	-0.828547065805875	-2.67462927985716
73.5	1.5	3012.27083333333	12.9400441708817	5.46141731813056	2.78212240876082	-1.89714547762993	-0.885674464281314	-2.67206773637303
73.5	2.5	2929.97222222222	12.9213475910134	5.49145333126404	2.81303393810654	-1.82674785981747	-0.944380734940379	-2.61394795202519
73.5	3.5	2817.0625	12.8885048918253	5.46183993813201	2.82049539528219	-1.86495598033727	-0.99977035680013	-2.63776617303261
73.5	4.5	2666.13194444444	12.8584671599068	5.43329892148986	2.78331127207606	-1.85722770019869	-0.963516435846673	-2.64008269142633
73.5	5.5	2636.39583333333	12.8955361204840	5.45140268331445	2.79352352329922	-1.84360591743836	-0.978631879310172	-2.54705522183279
73.5	6.5	2482.39583333333	12.9175874677931	5.4922452802233	2.73360887881468	-1.83211344993047	-1.01760167637585	-2.50332025176418
73.5	7.5	2382.18055555556	12.9042802637940	5.57049399242191	2.74959884955278	-1.82706839369481	-1.01683943182225	-2.52776399332420
73.5	8.5	2469.70138888889	12.8967186843279	5.58829231750206	2.73660327761395	-1.82460787640703	-1.02859614626767	-2.50681100947725
73.5	9.5	2335.17361111111	12.8791641810339	5.64060108968907	2.77693911536343	-1.79155964081573	-1.02846558941957	-2.50454590772514
73.5	10.5	2187.625	12.8907304787371	5.70390541950237	2.7202353631529	-1.76369976630818	-0.83768329988415	-2.55613500726152
73.5	11.5	1985.44444444444	12.8865422029680	5.73718161722684	2.72743001173806	-1.62091759372849	-0.714396766593533	-2.09826277623507
73.5	12.5	1752.52083333333	12.8785786705473	5.76693188194372	2.80210093046364	-1.61809905066464	-0.68012012133335	-2.04754936109237
73.5	13.5	1452.79861111111	12.8426957359636	5.82071898593731	2.82429854388864	-1.55036873289863	-0.684098011723882	-1.94052280241196
73.5	14.5	1030.18055555556	12.7673982100384	5.83275506959939	2.81369361091737	-1.53987948141063	-0.68325230859394	-1.98919478643707
73.5	15.5	586.416666666667	12.8744637111882	5.89600937024505	2.90154099840642	-0.957684940686953	-0.602510946295754	-1.79988379693813
73.5	16.5	426.8125	12.7744608843426	5.94620651521452	2.97911788134573	-0.899868598538943	-0.592957832621055	-1.72008667104948
73.5	17.5	384.222222222222	12.7663328951111	5.95326639632207	2.97747127647074	-1.31140762541388	-0.675542006164057	-1.66580518068916
73.5	18.5	346.861111111111	12.7198370627575	5.94148771032141	2.99821343152444	-1.35634410962695	-0.730683095063271	-1.74001216458504
73.5	19.5	375.381944444444	12.7051531689909	5.94197453623158	3.00080228140994	-1.44928793578987	-0.760300843747101	-1.70413078457342
73.5	20.5	423.923611111111	12.7063438198344	5.96365557061322	2.98987483084431	-1.57009842438097	-0.830244738779376	-1.74238770155581
73.5	21.5	449.333333333333	12.7100114498399	5.97240287154425	2.98962269176947	-1.5700647753412	-0.850662401428685	-1.72392635925603
73.5	22.5	436.458333333333	12.7617151253104	5.94135354221279	2.98851311661867	-1.51561888482089	-0.836974884816874	-1.76441277519537
73.5	23.5	413.729166666667	12.7429811032456	5.93848549091546	2.98520653447416	-1.49216793531788	-0.793653709978795	-1.77063199377889
73.5	24.5	417.368055555556	12.7071800680124	5.97807039827479	2.97250186825919	-1.50974518999174	-0.86017993559128	-1.78079979004585
73.5	25.5	425.625	12.7155114656663	5.9615367666231	2.99539430923350	-1.55155591860877	-0.869206850303513	-1.78939060703933
73.5	26.5	419.583333333333	12.6757062494429	5.94324626504144	2.99490891129148	-1.50170174034787	-0.911489499896965	-1.77490039906134
73.5	27.5	372.715277777778	12.7139940592790	5.9201338373289	2.97355948686887	-1.58101822443451	-0.922939314363005	-1.75471160350464
73.5	28.5	357.569444444444	12.7130879690499	5.92383983488618	3.01074449582494	-1.57737833202863	-0.828323036504303	-1.79449259467905
73.5	29.5	346.4375	12.7034370035677	5.91972196377316	3.01547349449127	-1.55835842156365	-0.834506461623072	-1.81067873181495
73.5	30.5	330.576388888889	12.7117613197727	5.92456351276021	3.00719084231827	-1.57992681873017	-0.890421308173196	-1.83420866133386
73.5	31.5	307.9375	12.7391714233377	5.91185395929353	2.98487778535039	-1.61677257217298	-0.980436199977008	-1.77931496746326
73.5	32.5	281.631944444444	12.7671416918264	5.89981508886482	3.00127423260796	-1.64034717545967	-0.943242155667187	-1.71619034047164
73.5	33.5	272.833333333333	12.7839661896937	5.89029957762556	3.0206647410235	-1.62582471412638	-0.933003438603938	-1.68653088199873
73.5	34.5	254.138888888889	12.7729071501431	5.88580420810642	3.02552569629374	-1.64164449810167	-0.903663956718982	-1.74283729701694
73.5	35.5	244.513888888889	12.8471553204203	5.87230026207002	3.02923865249496	-1.63864664670626	-0.88386759147315	-1.68207719693668
73.5	36.5	238.527777777778	12.8401875034309	5.87819979599246	3.04544785213689	-1.62618901368357	-0.884753180938815	-1.61942730883466
73.5	37.5	233.236111111111	12.7823073167985	5.87451399513052	3.05876219161548	-1.58075467689969	-0.932624135890257	-1.63425662789656
73.5	38.5	238.611111111111	12.7460691828665	5.86187602722633	3.03576626647522	-1.58510347132295	-0.989882014874918	-1.69135318617932
73.5	39.5	253.833333333333	12.7692109314896	5.83175511267809	3.01477831863935	-1.62128624286524	-1.02433992853322	-1.82511307375853
73.5	40.5	290.652777777778	12.7783319228145	5.80986670417415	3.02385553377985	-1.60933236849314	-0.948817783637985	-1.83428796312695
73.5	41.5	298.256944444444	12.7531354154222	5.86392331105514	3.04428063025438	-1.62752930468756	-0.966688329708986	-1.84292759399115
73.5	42.5	326.472222222222	12.7490695107735	5.86743422104049	3.04467779324085	-1.62746936061663	-0.96081724370749	-1.85543162805889
73.5	43.5	345.395833333333	12.7569801444979	5.87764257846707	3.05828339761318	-1.63833649603075	-0.945087873420991	-1.87528439438632
73.5	44.5	339.520833333333	12.7644606240482	5.87347198055063	3.06764511978299	-1.62022060964025	-0.92215965532568	-1.84813875926410
73.5	45.5	325.284722222222	12.7875561806141	5.85370617198525	3.065745361318	-1.65611151302822	-0.924176040994745	-1.83328928380700
73.5	46.5	302.923611111111	12.7841577617443	5.9245139668854	3.06820394661732	-1.64657920219250	-0.927939462612098	-1.82110817241259
73.5	47.5	283.444444444444	12.7721599548822	5.93061198181168	3.04857829635104	-1.64243439976559	-0.927067390920035	-1.82349346694199
73.5	48.5	245.270833333333	12.8455987734617	5.81870513432648	3.02112810486873	-1.68888443355564	-0.89257728542337	-1.85371231692617
73.5	49.5	231.576388888889	12.8570776204151	5.80856307956434	3.02141421628758	-1.68471147441254	-0.86824475812069	-1.83978991307664
73.5	50.5	223.833333333333	12.8282745764178	5.79934135444879	3.01070485489535	-1.68596760838209	-0.939261766412168	-1.82392169129899
73.5	51.5	177.277777777778	12.8845044584964	5.76803762752081	2.99989402760690	-1.69104991689938	-1.12353435995899	-2.09200687683449
73.5	52.5	102.534722222222	13.0033232274328	5.80132519712648	2.97351918010721	-1.65301948633032	-1.10476740348287	-1.53362244381356
73.5	60.5	209.916666666667	13.1540698451152	5.65659594349091	2.99742446031763	-1.63062640104385	-1.0440302732765	-1.55268386678401
73.5	61.5	116.1875	13.2804976080759	5.8437761863843	3.03716780403465	-1.62994062059682	-1.01198005054897	-1.26005304239574
73.5	62.5	118.118055555556	13.3320350291329	5.83761911948211	3.06380807814813	-1.63864595331708	-0.967158376130762	-1.23262871186057
73.5	64.5	103.534722222222	13.2794723708188	5.86320393092065	3.1106515762265	-1.64789674213709	-0.998743834359782	-1.3154734934894
73.5	65.5	93.5763888888889	13.2229026679884	5.81777378628853	3.09204638003966	-1.65626832227606	-0.977747170269777	-1.22377915364620
73.5	66.5	55.8680555555556	13.4030940679171	5.83196247241549	3.13847455925545	-1.62683165434744	-0.942851969447547	-1.22820146366207
73.5	67.5	45.8958333333333	13.3694380715880	5.86938478742749	3.14820558485167	-1.57958777543959	-0.94705028057995	-1.20125973081951
73.5	68.5	25.6805555555556	13.3687585524637	5.83569349536563	3.09931645575696	-1.6251230074026	-0.904694349518732	-1.19484999007357
73.5	69.5	14.6666666666667	13.3276706343328	5.86839947356916	3.07160709026043	-1.64628588720666	-0.861145366292215	-1.18394798832880
73.5	74.5	11.1388888888889	13.3295756300419	5.847779505649	3.08574437475861	-1.63068393649542	-0.850768271649348	-1.14945991864020
73.5	76.5	10.0902777777778	13.3369040598143	5.85330269813503	3.10328675701064	-1.63396021473991	-0.8385160189581	-1.11788133731204
73.5	77.5	15.4305555555556	13.3414232963503	5.83753836756403	3.10052074106938	-1.64167595694464	-0.901122704233566	-1.14503619565585
73.5	122.5	9.0625	13.3853129595809	5.83305085344009	3.06438658836064	-1.67056899268542	-0.846777286691922	-0.932491393656624
73.5	128.5	8.77777777777778	13.3831848870483	5.92462733388773	3.12827258928087	-1.65185767834871	-0.84952668202202	-0.933558170309546
73.5	129.5	11.9513888888889	13.3798635642591	5.91724366514241	3.11641440848985	-1.65885338379008	-0.87668778995529	-0.9294895831001
73.5	130.5	21.0069444444444	13.3983489982554	5.91130367992425	3.13835982492376	-1.65543404182084	-0.916759940607246	-0.943520211795839
73.5	131.5	20.9166666666667	13.4354323114594	5.90547257220901	3.13866315889605	-1.65034168447914	-0.97324316256068	-0.949297007093645
73.5	132.5	15.1111111111111	13.5051275772279	5.89901430684944	3.18330449055345	-1.64931132289044	-0.989006451993861	-0.955729087913233
73.5	133.5	13.1944444444444	13.4604710805468	5.82879402108675	3.11879622130014	-1.65591921355671	-0.870183585731651	-0.962305495048433
73.5	134.5	15.9236111111111	13.4304792432378	5.88237397421905	3.20978796278276	-1.68076379437855	-1.11588396871806	-0.979225589407247
73.5	135.5	21.375	13.4650362803441	5.88709081653287	3.21848407237463	-1.66180883965513	-1.00664332939981	-0.970386671032626
73.5	136.5	19.6666666666667	13.5283400427065	5.90093651360261	3.20188765717208	-1.67547054801900	-1.00758958650659	-0.959541160134075
73.5	144.5	7.45833333333333	13.3420629091069	5.88327296467756	3.00742125711947	-1.67789151514683	-0.909769389258526	-0.944659921924392
73.5	145.5	8.73611111111111	13.3595417588277	5.87920781711358	3.00986220705501	-1.68170533934612	-0.900613161293768	-0.94190457963302
73.5	146.5	11.2777777777778	13.3564549210059	5.87931354319529	3.00953428303622	-1.68150313164906	-0.904288010258527	-0.947937754940333
73.5	147.5	12.6805555555556	13.3531121678481	5.88300758121917	3.01708051820793	-1.68021273921821	-0.918882057758038	-0.940572234445158
73.5	148.5	14.1527777777778	13.3513201353547	5.87536668639679	3.0176036327786	-1.67704030903347	-0.843070800885417	-0.939139411410575
73.5	149.5	14.875	13.3449680006212	5.85925829268518	3.00301487402950	-1.6788929642638	-0.843745964681383	-0.943016558036936
73.5	150.5	14.8055555555556	13.3660942090426	5.85980322602942	3.01316008750427	-1.68174766740759	-0.844161034360499	-0.943172153444669
73.5	151.5	15	13.3642838625198	5.85271982710103	3.02382148311581	-1.68103586601696	-0.83413172591121	-0.954256348107085
73.5	152.5	17.5694444444444	13.441136220843	5.86950667046417	3.05308945522466	-1.65026856210526	-0.873024120063008	-0.968956737836405
73.5	153.5	24.8541666666667	13.3883333962	5.81300010500136	3.07107331755263	-1.67275331057444	-1.05712127515617	-0.950010395233162
73.5	154.5	31.8819444444444	13.3619747555365	5.79893325946132	3.07368809703824	-1.67391009674835	-0.946855580508916	-0.978964207513268
73.5	155.5	33.0277777777778	13.3355794591246	5.80597297464929	3.04747618504567	-1.66007915737953	-0.888799542851385	-1.05475575389424
73.5	156.5	26.5625	13.3165197946813	5.84929746403035	3.03238415133382	-1.68243193026107	-0.775310671553397	-0.990850840093336
73.5	157.5	23.1875	13.4107412663904	5.86558195410067	3.060263762113	-1.68137133752623	-0.854917078395735	-1.00643582600829
73.5	158.5	24.8472222222222	13.2999691144629	5.82208078567754	3.04350533914303	-1.63582743584073	-0.986944817154148	-1.05181280308476
73.5	159.5	26.7569444444444	13.3071646625706	5.81199886676433	3.05371547712619	-1.64731023864145	-0.98593664805193	-1.05055121717933
73.5	160.5	28.5347222222222	13.2633620743777	5.79364165558368	3.03748390108009	-1.65506373565095	-0.923236838299303	-1.05998862954725
73.5	161.5	29.4236111111111	13.2732807807998	5.78933032627126	3.01604916180511	-1.63219885964446	-0.881198684342556	-1.05671471980844
73.5	162.5	31.7708333333333	13.2337177281246	5.83957532352893	3.00447745089672	-1.61201449710236	-0.896710980412942	-1.09181839119281
73.5	163.5	33.3263888888889	13.2173844950599	5.84412310887042	2.99594855798502	-1.59756789384211	-0.863135364780724	-1.13458409922175
73.5	164.5	34.3611111111111	13.2260625141993	5.8034567157669	2.98421896438256	-1.59332324078282	-0.889142954745065	-1.15066068230112
73.5	165.5	35.7291666666667	13.2197971439705	5.76197361232489	2.93631581460562	-1.58211007421161	-0.91595262748221	-1.14522828980981
73.5	166.5	36.625	13.1281296522876	5.7066430363338	2.91493320045385	-1.56714638744589	-0.913434280651266	-1.18828781453733
73.5	167.5	36.7847222222222	13.1287649256585	5.68101174799304	2.92658186213565	-1.59960318526314	-0.945079483831452	-1.32754346841362
73.5	168.5	37.8333333333333	13.1274376600303	5.57660003150169	2.92670400264423	-1.68770567250099	-0.92767031052834	-1.35611173665433
73.5	169.5	39.1944444444444	13.0934418463827	5.56729567281283	2.94087106752092	-1.65296576399451	-0.90370270832446	-1.2436465931342
73.5	170.5	40.25	13.1057322075993	5.50897473932358	2.91643761131332	-1.65398079154320	-0.882142899730272	-1.23694007462382
73.5	171.5	41.5277777777778	13.0937448593161	5.59762362262946	2.92463225023444	-1.61124907735477	-0.834681934315192	-1.22372686561333
73.5	172.5	42.7291666666667	13.0985671977302	5.62403703796843	2.90146426766120	-1.60811527221825	-0.9067189643095	-1.21756362595062
73.5	173.5	43.0833333333333	13.1324886280883	5.66835269304547	2.90489380106983	-1.60336621668869	-0.848152747019587	-1.22165658781814
73.5	174.5	44.2083333333333	13.1031891060207	5.69409500419156	2.91047027904776	-1.53305263188386	-0.786653426873353	-1.21275304144585
73.5	175.5	46.3402777777778	13.0703331027845	5.66751006355883	2.91539961854410	-1.56841456125040	-0.809122322097857	-1.25948747202272
73.5	176.5	49.1041666666667	13.0557213972424	5.53442277775836	2.87247683756306	-1.66646827429774	-0.890828441163313	-1.35005998832285
73.5	177.5	51.6111111111111	13.0852179699162	5.52545482938335	2.86099143822105	-1.64966334208076	-0.924212559774	-1.32173892149735
73.5	178.5	55.8472222222222	13.0625106499960	5.51996999325506	2.87007787557621	-1.67589345106952	-0.93529288170927	-1.50351727922451
73.5	179.5	75.8888888888889	13.0032905707304	5.56882502888647	2.87476358866973	-1.64352027617094	-0.938199925465384	-1.51092693785901
72.5	-176.5	78.8472222222222	13.0041025744120	5.60772924478052	2.85262594864189	-1.66415518048861	-0.875513831988486	-1.42995853921133
72.5	-175.5	81.2013888888889	13.0136410485674	5.63787928281171	2.85538264283421	-1.67444215157148	-0.796517815627752	-1.42363760082557
72.5	-174.5	65.8541666666667	13.0603082306097	5.61508098600544	2.90149397409039	-1.64155811467947	-0.959964243930728	-1.43689787213577
72.5	-173.5	58.125	13.0766182996686	5.67923520519109	2.91053482843872	-1.61795122249042	-0.921478829993602	-1.35712015797842
72.5	-172.5	65.5208333333333	13.0564859468053	5.72765923621987	2.85640779814100	-1.62053974687014	-0.806501974418908	-1.36259363098012
72.5	-171.5	63.4375	13.1086930931680	5.77997163660311	2.85455361623405	-1.62327296789186	-0.801201237771155	-1.26719296733047
72.5	-170.5	64.0625	13.1290249379513	5.79067521150672	2.84465612108684	-1.63102263818698	-0.899166262667733	-1.28075739882395
72.5	-169.5	67.4722222222222	13.1041980698780	5.79230675005392	2.83132008408754	-1.66880817693078	-0.92787887901086	-1.27728830424496
72.5	-168.5	58.1527777777778	13.0990993717690	5.79310493805443	2.84086136241892	-1.65112486822274	-0.89977955467861	-1.27370117827042
72.5	-167.5	54.3263888888889	13.1213970334012	5.79195182674185	2.86568771368053	-1.66322053924567	-0.829243126863856	-1.26255236149529
72.5	-166.5	52.3194444444444	13.0972821383280	5.76145850588748	2.85148258887817	-1.63927240869923	-0.778605157043658	-1.31472531980827
72.5	-165.5	52.5	13.0835672128694	5.6992519246816	2.87849817401395	-1.62253047008743	-0.759949165153902	-1.31538325542296
72.5	-164.5	53.1805555555556	13.0867967989402	5.72095895422599	2.88790964243507	-1.62810234789704	-0.845605001424008	-1.33342701996850
72.5	-163.5	52.7638888888889	13.0883070017317	5.65191529125909	2.89855761704702	-1.65600254148244	-0.826096262056977	-1.31530269022636
72.5	-162.5	52.8472222222222	13.0870761895412	5.7049691851018	2.90017304071831	-1.67428222469080	-0.885363063548404	-1.30309162728915
72.5	-161.5	47.4375	13.1019320258509	5.75858552299928	2.89100005177974	-1.64379395545241	-0.882724699086414	-1.31341026885048
72.5	-160.5	56.0763888888889	13.1000516226826	5.80116034889657	2.97457359832316	-1.64489107857109	-0.967614969230026	-1.34597210766886
72.5	-159.5	82.8472222222222	13.107027477738	5.7490172641174	2.96159092038069	-1.65955417842955	-0.945982749240952	-1.35893623887262
72.5	-158.5	221.527777777778	13.0995351333741	5.80217444273861	3.09604623888997	-1.67222473067856	-0.939587464169827	-1.60408072197295
72.5	-157.5	528.013888888889	13.1330623552449	5.64944633663525	3.10554728424261	-1.61510926759991	-0.651868208053199	-1.54768459036497
72.5	-156.5	1241.47916666667	13.1673335006654	5.59248327053116	3.05492250236092	-1.81417025279308	-0.646690560248653	-1.72375590994506
72.5	-155.5	1665.46527777778	13.1884007420940	5.56519556186451	3.00882521868110	-1.8188959857425	-0.674945151065514	-1.68445440537783
72.5	-154.5	2342.05555555556	13.1681962282065	5.49774191489534	3.02735432222027	-1.84102415391284	-0.675728647374088	-1.71105726223154
72.5	-153.5	2771.40277777778	13.1209651051754	5.42375174259316	3.02307074164475	-1.88218577672952	-0.682953106161666	-1.72170831450174
72.5	-152.5	3117.44444444444	13.1674879070406	5.36725943685162	2.95003749848368	-1.89000368103512	-0.665317323056101	-1.81956788362645
72.5	-151.5	3420.23611111111	13.1710664256735	5.3254369398756	2.90428161791639	-1.88998289041337	-0.654834147537612	-1.73300985517964
72.5	-150.5	3555.61805555556	13.1979870795274	5.33639033365473	2.8661022937643	-1.91390483120786	-0.735451258223578	-1.64019802299396
72.5	-149.5	3596.74305555556	13.2157176520180	5.37599135536348	2.86758562317916	-1.90468228040983	-0.754030394731188	-1.66284379891133
72.5	-148.5	3594.15972222222	13.2121139658669	5.42810110194843	2.91218958641365	-1.94193177277839	-0.744032627750693	-1.71179827993205
72.5	-147.5	3592.90972222222	13.2043081257759	5.42216981188872	2.89777717733478	-1.93001693584057	-0.791756848533349	-2.22144886290036
72.5	-146.5	3510.77777777778	13.2120402968585	5.47837742687785	2.98011432296539	-1.87644141326826	-0.978118296748955	-2.40011392673473
72.5	-145.5	3427.125	13.1992008609404	5.4845405395345	2.97338271503749	-1.85418993915624	-0.945079204379334	-2.19504666437595
72.5	-144.5	3364.56944444444	13.1957145225041	5.42199627202411	2.98650120248349	-1.91905125316553	-0.989022494330212	-2.24464521568682
72.5	-143.5	3326.63194444444	13.1894380879115	5.3648694671876	2.97217059083934	-1.93538431619408	-0.995208504421839	-2.31160002315092
72.5	-142.5	3258.03472222222	13.2139921387011	5.40285692773334	2.99757643181720	-1.89438771532126	-0.746188626833012	-1.56891466301823
72.5	-141.5	3154.35416666667	13.1856609817032	5.34536658255327	2.89183016926870	-1.84839130639950	-0.947900941063548	-2.40963021606369
72.5	-140.5	3069.53472222222	13.1694688030804	5.23830045883839	2.87518956400579	-1.90267600511817	-0.948687878953423	-2.52575479656786
72.5	-139.5	2930.52083333333	13.0169983737219	5.08253175193555	2.84048429239373	-1.90193143256019	-1.01920292932717	-2.5342783115969
72.5	-138.5	2729.81944444444	13.0214696945699	5.12010493012933	2.81830511093344	-1.90324007839139	-1.02973277777418	-2.45932159387777
72.5	-137.5	2567.97916666667	13.0567505944858	5.15748654161258	2.87497780091233	-1.84861194466033	-0.796306605153084	-1.68617671476799
72.5	-136.5	2528.02083333333	13.0337934044223	5.10186035729958	2.85068360737598	-1.89203875120193	-0.990787816836126	-2.38010466186245
72.5	-135.5	2457.02083333333	13.0569466885661	5.04737627111916	2.84900147554553	-1.93508733027073	-1.13583111623522	-2.50094706497015
72.5	-134.5	2294.61805555556	13.0443453740822	5.1607545050717	2.90739819541452	-1.92619594241708	-1.10314810347085	-2.32836024196876
72.5	-133.5	2110.94444444444	13.0532694624659	5.14340143309184	2.97278733266311	-1.89877738002706	-1.00424712469766	-1.80742167412164
72.5	-132.5	1912.08333333333	13.0822489521282	5.352346560597	2.965891101605	-1.89672836344910	-0.926838360957356	-1.53601202862662
72.5	-131.5	1663.35416666667	13.0723750034159	5.18564955814527	2.99748302317207	-1.99333580243199	-1.01542465440665	-2.01729033024686
72.5	-130.5	1238.57638888889	13.0635582956655	5.17432443505057	2.95932689401414	-1.94509810451424	-1.03191860659621	-2.16399039387383
72.5	-70.5	1592.96527777778	12.9149468285919	5.45823491108176	2.82065879230669	-1.77625416786133	-1.26842326398479	-1.52517711007857
72.5	-69.5	1902.71527777778	12.9292974056263	5.44050561299669	2.76219239547284	-1.73051754305066	-1.34669147817122	-1.63473596380183
72.5	-68.5	2163.25694444444	12.8981583589481	5.42949394586809	2.77478822922542	-1.76837167484312	-1.33859065528121	-1.71231229203971
72.5	-67.5	2317.36805555556	12.9864449058787	5.39030673059477	2.77854834343947	-1.76733022909254	-1.34799136963110	-1.78035466429875
72.5	-66.5	2341.77777777778	13.0451994525740	5.36414819230447	2.78759240975923	-1.78364739879962	-1.36702007253282	-1.82123535096069
72.5	-65.5	2330.90277777778	13.0349193005712	5.27564438668386	2.78908556372373	-1.79254457603235	-1.33309990248123	-1.88649169683507
72.5	-64.5	2271.45833333333	13.0036078971981	5.33057239134372	2.78693448152755	-1.76744164560882	-1.35785984816664	-1.86076003625924
72.5	-63.5	2165.24305555556	12.9729763741388	5.41746463806914	2.76741165266397	-1.78148244402559	-1.36224153380544	-1.91456929843170
72.5	-62.5	1892.28472222222	13.0014218618042	5.39898558212907	2.80315093159408	-1.73991138228981	-1.25598970427990	-1.86487081483852
72.5	-61.5	1101.14583333333	12.9384106500722	5.49739721765843	2.82960209803259	-1.80997618290194	-1.25343829945803	-1.89553019962400
72.5	-60.5	663.555555555556	12.9465870508608	5.62507270390552	2.99479924769725	-1.68469464194171	-1.41452495819755	-2.24287981020504
72.5	-59.5	426.951388888889	12.9631335735645	5.56384426008145	3.03915024153474	-1.62298414246011	-1.33044507427849	-2.04568633977567
72.5	-58.5	265.784722222222	13.0154882612731	5.73741710847627	3.20078802619476	-1.67341336877896	-1.4256676085824	-2.02533748834090
72.5	-57.5	226.138888888889	13.0250706723305	5.81640892162309	3.24433608742993	-1.70684330024144	-1.12398424914305	-1.60701790800139
72.5	-21.5	199.430555555556	13.0166593313060	5.73130845198031	3.01675593710223	-1.64303277265244	-0.825583619452903	-1.64812786120637
72.5	-20.5	251.055555555556	12.9550270422876	5.78152286458594	3.01360463416956	-1.68436939948474	-0.94922810916917	-1.77132912273881
72.5	-19.5	239.444444444444	13.0423624317390	5.80684724678592	3.00723557921626	-1.64722398258787	-0.908350668122236	-1.63235877520585
72.5	-18.5	295.715277777778	13.0943778512246	5.77900704662308	3.003802938967	-1.60589079982523	-0.795794073275752	-1.63023883185562
72.5	-17.5	660.604166666667	13.0584077526083	5.76055691550156	2.99696548947753	-1.61109689643927	-0.684298307795401	-1.72564733435671
72.5	-16.5	1256.79166666667	13.0647594507873	5.69271009852983	2.86063150116879	-1.83297287182165	-0.686167429068404	-1.78035456198274
72.5	-15.5	1779.96527777778	13.1003789040807	5.6185271632534	2.84720040203465	-1.82665996407277	-0.502007729564457	-1.8043171379822
72.5	-14.5	1923.02083333333	13.1609177139019	5.70739083637822	2.81855804816668	-1.82008142804966	-0.503388624069184	-1.89111290605387
72.5	-13.5	2077.55555555556	13.2060402489241	5.65307561508979	2.72478967529283	-1.88094872171000	-0.505334500968458	-1.93646604237774
72.5	-12.5	2186.74305555556	13.1999397408612	5.63139746462224	2.70087746625873	-1.87562332741470	-0.500254514566027	-1.92372103875892
72.5	-11.5	2204.4375	13.0963603870967	5.63822949644108	2.70989277135795	-1.87781830958071	-0.55839478259365	-2.04299267895794
72.5	-10.5	2325.47222222222	13.0898014181235	5.60305941927713	2.67850456120758	-1.88842394883528	-0.814391347117485	-2.4890109125341
72.5	-9.5	2356.73611111111	13.0750071460482	5.57389716756923	2.68619087351657	-1.87206648646152	-0.807828107063319	-2.55148750066713
72.5	-8.5	2463.01388888889	13.0314459160112	5.55613227772931	2.67245701179585	-1.87264617622851	-0.795238292332574	-2.56028313033491
72.5	-7.5	2532.84722222222	12.9864556329229	5.51744957144622	2.65616275339531	-1.86385979464616	-0.82367442852603	-2.56157853965629
72.5	-6.5	2610.875	12.9725867028270	5.44808568734081	2.65587904895904	-1.86209738353679	-0.816895212163645	-2.56027349396448
72.5	-5.5	2616.41666666667	13.0036013948917	5.44500592332972	2.64385824437169	-1.88106625187041	-0.86342772120108	-2.57607414496005
72.5	-4.5	2686.20138888889	13.0083349279927	5.46521108008549	2.73520818381505	-1.87097091014193	-0.83950629255415	-2.57722851359679
72.5	-3.5	2685.97222222222	12.9697851929661	5.45001840139597	2.75801162484855	-1.88167540491644	-0.876477996678817	-2.58884020220757
72.5	-2.5	2611.63888888889	12.9420178213624	5.42610383853171	2.74989766856143	-1.87461425152426	-0.896544201736774	-2.61748047875079
72.5	-1.5	2521.9375	12.9459675130614	5.41502881785789	2.77459775927737	-1.86074291998092	-0.902993014860806	-2.61842549388635
72.5	-0.5	2429.6875	12.9080440311167	5.44919837221811	2.80745503651144	-1.82346787155372	-0.968037737826335	-2.66648084379117
72.5	0.5	2410.27777777778	12.8673962982357	5.45582630863345	2.82517319172962	-1.81878845203296	-0.947343656518517	-2.66019864448555
72.5	1.5	2381.48611111111	12.8513087860635	5.49784063291326	2.80206574432226	-1.77201675338310	-0.982372122352417	-2.62967624651438
72.5	2.5	2328.93055555556	12.8378835076747	5.48030670126341	2.78475734588385	-1.78694520457579	-0.99024354660838	-2.62573369601256
72.5	3.5	2490.95138888889	12.8248534195030	5.4275458068838	2.74774462095723	-1.85943291887977	-1.01935546744578	-2.69176505298665
72.5	4.5	2536.30555555556	12.8812797841834	5.46343014805937	2.69961654819721	-1.83317133262316	-1.01449926451478	-2.67986935525180
72.5	5.5	2562.09027777778	12.8993641073114	5.49534325704591	2.68049055579513	-1.78667440770325	-1.01767968212529	-2.5981087745922
72.5	6.5	2548.19444444444	12.9020490846523	5.63206968308898	2.66975922126552	-1.78985561397125	-0.99917401023943	-2.63585387515777
72.5	7.5	2566.24305555556	12.8882553713927	5.66499295566968	2.67218422590432	-1.74748269599625	-0.95387863691156	-2.58042200111285
72.5	8.5	2458.16666666667	12.8908066356780	5.68768740440614	2.68656700652448	-1.60368918256992	-0.839052509629814	-2.49459923601965
72.5	9.5	2309.02083333333	12.8901440887535	5.69704174478352	2.71719469520495	-1.62341542222452	-0.71300053591886	-2.43122854662076
72.5	10.5	2129.36111111111	12.8813626608465	5.73952337821978	2.69788607593341	-1.51055402378243	-0.591598546614199	-2.50188489732649
72.5	11.5	1925.29861111111	12.8989286457255	5.7629872038231	2.6521072190937	-1.22650526394825	-0.562159507365993	-2.04445662508726
72.5	12.5	1668.51388888889	12.8342762985110	5.79986012492688	2.77468031898979	-1.11159290635745	-0.548037449328659	-1.89878784395489
72.5	13.5	1334.13888888889	12.8390120181580	5.81415734059046	2.74519252689878	-1.15881948445396	-0.552391754264494	-1.91640185964946
72.5	14.5	946.486111111111	12.6672504056113	5.83120724299432	2.82031244177003	-1.06285356397093	-0.658132777181947	-1.866560584572
72.5	15.5	555.159722222222	12.7570275462104	5.85928505660632	2.84108151624278	-0.914116482177054	-0.63863522150605	-1.76166033346229
72.5	16.5	408.125	12.7797912557699	5.94787718056621	2.93867517467849	-0.866530140246456	-0.660832497884547	-1.70954052776437
72.5	17.5	368.173611111111	12.8353136857195	5.9435684857719	2.93542910136103	-0.905096725343085	-0.747320318524726	-1.74303140530989
72.5	18.5	362.625	12.8056186680460	5.9672632357684	2.95435056689963	-1.14102806764632	-0.830895382504689	-1.76579941746365
72.5	19.5	364.604166666667	12.826544820262	5.97985590854612	2.96321130308642	-1.15776047911039	-0.831606476114144	-1.75914821488595
72.5	20.5	372.194444444444	12.7592450223421	5.99456619185511	2.96910805544016	-1.36648497259053	-0.755538880943184	-1.73370816286705
72.5	21.5	365.680555555556	12.7430212602038	5.97569988613981	2.98945598711029	-1.42259107163495	-0.794891425968608	-1.73785446520634
72.5	22.5	356.486111111111	12.6988404829826	5.95813447042187	2.98182748626546	-1.40037481720647	-0.791321271527282	-1.72397717114780
72.5	23.5	322.048611111111	12.7426413638390	5.93677309043652	2.97266933347153	-1.39007866772040	-0.686325159753842	-1.74888606076469
72.5	24.5	307.770833333333	12.7471158650504	5.92807626509666	2.99595409648633	-1.41090873162998	-0.756206692981378	-1.74124714000993
72.5	25.5	287.145833333333	12.7518842508332	5.90733597353604	2.98674174573127	-1.47525560896899	-0.764844390445692	-1.76136178327045
72.5	27.5	274.659722222222	12.7752512194161	5.93530013065885	2.99134669080777	-1.56987651004601	-0.995947343768981	-1.76002152539496
72.5	28.5	293.090277777778	12.7850996526541	5.92941615292191	3.0052034769493	-1.56575701366260	-0.995442627310643	-1.74856176082928
72.5	29.5	283.104166666667	12.7441887078682	5.92072900986645	3.00908145357251	-1.58767645822492	-1.03164662887894	-1.74457170071272
72.5	30.5	288.013888888889	12.7749600520567	5.92686721490370	2.99239959220442	-1.61389818981050	-1.05331777804720	-1.76638449312321
72.5	31.5	276.659722222222	12.7627329450888	5.91318822405548	2.99497225552175	-1.65070947239951	-1.05894611556853	-1.77271860705886
72.5	32.5	268.236111111111	12.7967283599924	5.90979666159302	2.9989481891057	-1.63535432717868	-1.05424562855882	-1.76906578488601
72.5	33.5	261.180555555556	12.83551747846	5.88131104944814	2.99966860791164	-1.63257641513486	-0.968352713458522	-1.74873416453199
72.5	34.5	249.458333333333	12.8403594023459	5.8546110918482	3.00980868556596	-1.61693847130185	-0.94005587804472	-1.74100784636994
72.5	35.5	231.444444444444	12.8414993481068	5.85904778517616	3.0056063660691	-1.60842399806723	-0.930690965474846	-1.70862347961127
72.5	36.5	228.118055555556	12.7764354626219	5.85522844765422	3.01030099756087	-1.60460244455312	-0.887334345572332	-1.69003026122184
72.5	37.5	241.770833333333	12.7807001928776	5.84251303608859	3.03929744506451	-1.62102521354443	-0.89718743043916	-1.70206037592987
72.5	38.5	270.819444444444	12.717901102467	5.863767053875	3.0688551875552	-1.61674153239609	-0.914310912087406	-1.80378188796847
72.5	39.5	309.326388888889	12.8017898865064	5.88117258575617	3.07396725808421	-1.60997831899851	-0.899486815268862	-1.81486383498748
72.5	40.5	336.048611111111	12.8200207438302	5.90005921814213	3.06762235604733	-1.56294953501279	-0.866177461250121	-1.74992197117905
72.5	41.5	319.756944444444	12.7484308213266	5.89839219834459	3.06541569615079	-1.60922233351741	-0.918621306711119	-1.76154186837206
72.5	42.5	282.986111111111	12.7666891356110	5.88967669866291	3.04413180053989	-1.61845131523929	-0.9409978851256	-1.77070734852740
72.5	43.5	272.034722222222	12.8014211863499	5.89442133511693	3.03857781059529	-1.63817927838344	-0.935449279857893	-1.73426312984526
72.5	44.5	281.9375	12.7961202073412	5.88986182742457	3.04648408235671	-1.62963675050414	-0.942806996889154	-1.70102798588531
72.5	45.5	282	12.8012507109775	5.88988942441134	3.03039763634311	-1.61167141559173	-0.927654115202867	-1.67618751161104
72.5	46.5	262.868055555556	12.8071101462515	5.9660598539183	3.0376883214342	-1.62588058423231	-0.901182256219353	-1.66925772124699
72.5	47.5	236.6875	12.7663282198282	5.89335589230719	3.01952959536003	-1.62811612882769	-0.81750634305714	-1.65724277917410
72.5	48.5	193.236111111111	12.9161873335995	5.82969525245825	3.07628303366754	-1.64509239882897	-0.808913730972902	-1.66370137742427
72.5	49.5	155.444444444444	12.8367189259984	5.80934326067284	3.04824434728518	-1.67738417693862	-0.940247120792143	-1.61897084858238
72.5	50.5	141.173611111111	12.8632826530215	5.81169999714443	3.03552750298544	-1.65572298111391	-1.09752445571516	-1.60211098887753
72.5	51.5	77.4652777777778	12.8694983678204	5.8162440304052	3.03240664821698	-1.62369625015326	-1.23968591538666	-1.46401334691164
72.5	60.5	119.756944444444	13.223521074948	5.71871124913139	3.01977983755064	-1.64390053438209	-1.16689799920614	-1.77762795651311
72.5	61.5	104.465277777778	13.1811723318331	5.78817480591941	3.05430645712551	-1.65826164293498	-1.00814450110893	-1.63786516575138
72.5	62.5	96.2083333333333	13.2490664067447	5.80158302048128	3.07295068877819	-1.66790852151689	-1.04659692767060	-1.22421535535172
72.5	63.5	82.4861111111111	13.2249417132129	5.81700620135443	3.1024326766153	-1.65495312643399	-1.03221470093189	-1.23406463499126
72.5	64.5	77.6319444444444	13.3180196295786	5.86316416364392	3.12874607744815	-1.63405663081522	-1.00244511841914	-1.21250425358759
72.5	65.5	94.375	13.3804564291876	5.83100436767693	3.19490313152592	-1.63901282295303	-0.952259275074799	-1.22324114624396
72.5	66.5	103.25	13.4385622889510	5.85494687572109	3.19269784572715	-1.63661086238647	-0.944029539232072	-1.29377541363573
72.5	67.5	65.6875	13.372749769986	5.8346130728057	3.18513996867841	-1.61380388300862	-1.00320523990921	-1.20882632738435
72.5	130.5	14.9375	13.3599427850382	5.91313986501266	3.12647610965781	-1.6843646066186	-0.919021362821206	-0.945182932646784
72.5	131.5	19.9305555555556	13.3546765390954	5.90706983447284	3.14206987072082	-1.68533692210943	-0.966064620426013	-0.943169647879717
72.5	132.5	17.8819444444444	13.3592730899815	5.90836648766797	3.17272093458091	-1.69108404599634	-0.979540259427632	-0.95086871897663
72.5	133.5	18.1736111111111	13.3608227706858	5.9038492004353	3.17109915327054	-1.69909949153327	-1.01343470513958	-0.950834597560292
72.5	134.5	18.0833333333333	13.3773416271102	5.9023016660714	3.18999464668130	-1.70319631666235	-1.06131899049186	-0.95140783777935
72.5	135.5	17.9166666666667	13.3797482408049	5.90531713002824	3.18926459096508	-1.69744683419703	-1.05708809754514	-0.951554174478466
72.5	136.5	18.1736111111111	13.3758113226279	5.90209462932586	3.16816965193346	-1.69839842230373	-1.05183408269484	-0.951212161215958
72.5	137.5	20.3125	13.3718007732575	5.90491099448579	3.15304651476791	-1.69424780180107	-1.01653467575771	-0.953138399134473
72.5	138.5	15.1458333333333	13.3400773534764	5.91121098544589	3.1088257830117	-1.68102731951191	-0.992409991066084	-0.943996405397902
72.5	150.5	12.1736111111111	13.3490005912682	5.8848001995957	3.01171941621378	-1.70139521312381	-0.828627833457188	-0.928776660404687
72.5	151.5	14.7361111111111	13.3484643632595	5.86046130965665	3.02167302180698	-1.70619227249628	-0.81931101154056	-0.93403864106324
72.5	152.5	17.2083333333333	13.3264231562987	5.881851079239	3.08685008621526	-1.68041178935260	-0.882733665335472	-0.953800748247528
72.5	153.5	22.5138888888889	13.4003952820988	5.87507436151822	3.0644032776423	-1.69066578024922	-0.883275659280732	-0.95578650217158
72.5	154.5	24.4513888888889	13.4212851420225	5.85552298448648	3.04408871228766	-1.69365753083242	-0.863450525263024	-0.960419960473735
72.5	155.5	22.2430555555556	13.4097341247946	5.85618390633006	3.06571672150194	-1.68726061710548	-0.827584073253547	-1.02044018258776
72.5	156.5	20.875	13.4048034681532	5.85686088072424	3.07586303253719	-1.68223263896220	-0.813456257680087	-1.02552258339506
72.5	157.5	21.6944444444444	13.4107081670825	5.85671116267026	3.08144858009304	-1.68333129570080	-0.863999271549971	-1.02999726813753
72.5	158.5	21.9166666666667	13.3990616840365	5.87275387824064	3.07665299201603	-1.68246118640519	-0.902289252824205	-1.01587095519665
72.5	159.5	23.0902777777778	13.3588449951121	5.89381849436216	3.07613393873057	-1.67789407550633	-0.908444653506728	-1.05845251763649
72.5	160.5	22.5833333333333	13.4055896132895	5.82053805420359	3.11189049992695	-1.65120093298071	-0.950014765814289	-1.06500709124170
72.5	161.5	21.9652777777778	13.3427325558097	5.83822061957295	3.13220063383205	-1.64179275242044	-0.934589695955423	-1.08653026467710
72.5	162.5	23.8125	13.3429910591185	5.83943664127314	3.08827140439585	-1.63301585935228	-0.940259008537176	-1.10742618885749
72.5	163.5	25.3402777777778	13.2748599646896	5.81262287806837	2.96553809028568	-1.62221586921803	-0.845339533776685	-1.10806546589689
72.5	164.5	26.0972222222222	13.2938969765085	5.74574758052764	2.90712439711386	-1.63553267102218	-0.816939062721653	-1.12133352227354
72.5	165.5	27.0138888888889	13.2186149413111	5.72418132279351	2.87851599445168	-1.6206541945104	-0.861831084022439	-1.15460962460056
72.5	166.5	28.2222222222222	13.1698319877649	5.75751435857624	2.94742662139748	-1.62113832783667	-0.868271726094579	-1.20346522876899
72.5	167.5	29.1527777777778	13.1056895893055	5.70984805170871	2.94853991241987	-1.57261081382872	-0.892272457505166	-1.18213720528385
72.5	168.5	30.1388888888889	13.0785024069560	5.70378735789705	2.93436369042421	-1.54315295074705	-0.902871742587706	-1.25069538703966
72.5	169.5	30.9375	13.0479303668844	5.68300418994631	2.93283798300782	-1.55473157459876	-0.92535176361198	-1.31120879035595
72.5	170.5	33.3958333333333	13.0908260487913	5.58663516052178	2.90842340667959	-1.64699021088112	-0.974788009449898	-1.33320443122675
72.5	171.5	38.0833333333333	12.9914113559961	5.65323309551884	2.92203867398126	-1.57216628139738	-0.935582819020824	-1.31809790922984
72.5	172.5	42.1111111111111	12.9921507004212	5.65796889780938	2.90501998341538	-1.56007824090441	-0.896696054330428	-1.27414247936103
72.5	173.5	39.7569444444444	13.0479152232003	5.61724831302437	2.89812483892033	-1.55224286693237	-0.98042302313617	-1.27239482522653
72.5	174.5	40.1736111111111	13.0298920765786	5.65133942897543	2.90022707677927	-1.55914066064331	-0.983420351990244	-1.33456484758091
72.5	175.5	42.3055555555556	13.0227360454008	5.6570367013348	2.92058811378777	-1.57655484182262	-0.848568034185757	-1.39198879720322
72.5	176.5	45.3194444444444	13.0476908648790	5.6860476400244	2.89734340576197	-1.55105695311915	-0.882335724745005	-1.33865287834206
72.5	177.5	46.2222222222222	13.0260059361006	5.70001521075948	2.88543735264158	-1.52657014095008	-0.956415343397835	-1.38421614834644
72.5	178.5	46.5	13.0328745052198	5.70906451204038	2.90164117326376	-1.55098592016982	-1.00393546973440	-1.41240257101925
72.5	179.5	48.6041666666667	13.0112149665543	5.71220247787058	2.91296234545061	-1.5432787214531	-1.03720077036777	-1.42186790232203
71.5	-176.5	36.4236111111111	13.1284954068846	5.7130105329617	2.88390991645729	-1.58331112784281	-0.716176895603149	-1.25876049118699
71.5	-175.5	54.5069444444444	13.0771451545406	5.73431768027162	2.8759977652819	-1.60043214071906	-0.73040093471758	-1.2764401433502
71.5	-174.5	62.6041666666667	13.1158755487099	5.71403107393002	2.89054133991017	-1.58770866983819	-0.872770703667002	-1.40847044166906
71.5	-173.5	48.3472222222222	13.0734900792397	5.71612789110334	2.91339409774831	-1.58758701954855	-0.858469653480906	-1.37562100763683
71.5	-172.5	50.375	13.0711753424144	5.71348600131516	2.88646875098836	-1.5975964889921	-0.864124703912497	-1.38397756872076
71.5	-171.5	51.6458333333333	13.0786222838261	5.71273443580197	2.88139683395981	-1.58826891989502	-0.85893048903046	-1.37990958574615
71.5	-170.5	51.5069444444444	13.0898621182177	5.74250148984638	2.85630910200703	-1.60279486830405	-0.761405199556131	-1.27074606766378
71.5	-169.5	49.7152777777778	13.1313870454127	5.74269513715623	2.80971373415454	-1.6409678715683	-0.6983079557044	-1.24692716065227
71.5	-168.5	48.1319444444444	13.0773347630218	5.73478228266743	2.77245985687596	-1.62523951960313	-0.699555589396695	-1.24767347238500
71.5	-167.5	47.4375	13.0475418358128	5.71629226635162	2.85539798281521	-1.64862440111181	-0.63285948394243	-1.33041799949966
71.5	-166.5	44.0833333333333	13.0560673336219	5.74878636808207	2.86657350243601	-1.67014236447921	-0.786141637890812	-1.33379227356759
71.5	-165.5	40.8194444444444	13.0708109289741	5.75723537476051	2.85546958105521	-1.6645073879626	-0.756036363921042	-1.30850500864667
71.5	-164.5	41.0972222222222	13.0773410387059	5.8332430988242	2.84018705459538	-1.64151619925358	-0.770697873718975	-1.21577802719160
71.5	-163.5	42.7430555555556	13.0971620429937	5.81821200011465	2.86762514155244	-1.63102170572878	-0.747884436263054	-1.22331855382164
71.5	-162.5	43.5208333333333	13.1584641535233	5.84815080135977	2.85781442223283	-1.64890853928975	-0.776867603637841	-1.21850776521211
71.5	-161.5	45.6111111111111	13.1944911834857	5.87964439368226	2.87615265926404	-1.64096794715127	-0.573893912057119	-1.21741143041857
71.5	-160.5	48.9513888888889	13.2480716829407	5.85974899245376	2.90161609810712	-1.66819605611238	-0.652549212741772	-1.22064492292926
71.5	-159.5	56.4166666666667	13.1738092145208	5.83476155350903	2.87480650546837	-1.647863647088	-0.826151616702997	-1.23967994383211
71.5	-157.5	67.7083333333333	13.2487292037396	5.94840763528151	3.28977003709476	-1.65170697573632	-0.940928960279106	-1.12999359989633
71.5	-154.5	103.215277777778	13.3193188911662	6.05305687321786	3.16128207397342	-1.71258128700782	-0.890422291549358	-1.18588917291137
71.5	-153.5	182.361111111111	13.2838655318139	5.86834604184298	3.05364175097146	-1.72282139589230	-0.835471681534936	-1.34496839492096
71.5	-152.5	524.548611111111	13.2653583779853	5.94306372092957	3.19225384642106	-1.66504035577370	-0.719002587300461	-1.45666546192552
71.5	-150.5	1480.36111111111	13.1922398307203	5.59563341101426	3.053354130962	-1.82878230025937	-0.678275417636579	-1.57618812032727
71.5	-149.5	1817.52777777778	13.2026312082773	5.5771760960264	3.01907384606994	-1.84160965653256	-0.688806981805643	-1.52434880468702
71.5	-148.5	1983.82638888889	13.2221739560599	5.5201344777347	2.99175600831672	-1.82893022849089	-0.666971939115987	-1.53424749566913
71.5	-147.5	2445	13.2361067276431	5.4973196077377	2.98077492333976	-1.87934057226451	-0.678231546717532	-1.5592933149247
71.5	-146.5	2668.51388888889	13.2339228032233	5.52381218883295	2.9730381117159	-1.84611013052477	-0.675978095031057	-1.53071679713066
71.5	-145.5	2689.84722222222	13.2374258954004	5.50989854257343	2.97429591862156	-1.87877000942938	-0.675288726429095	-1.52007797492691
71.5	-144.5	2705.3125	13.287405723542	5.53508546764922	2.94456123543750	-1.88060367075248	-0.679415808883957	-1.54068299093807
71.5	-143.5	2766.24305555556	13.3100071884423	5.57629646346892	2.94191591889328	-1.85468225729033	-0.659962554940056	-1.50321516334204
71.5	-142.5	2840.32638888889	13.2518396477052	5.5825458132697	2.99562378965900	-1.84487586499113	-0.677841634422487	-1.50854285987712
71.5	-141.5	2737.25	13.2658084251064	5.58352712772593	3.00322867451402	-1.82475932703931	-0.665180571542353	-1.50597362695627
71.5	-140.5	2509.25694444444	13.2611126510135	5.6039304145843	3.03691665840922	-1.80456805966188	-0.767808261497869	-1.45306765777597
71.5	-139.5	2346.13888888889	13.2681608630921	5.59861003781237	3.02892074811866	-1.81723188776755	-0.76593700252056	-1.46633985182836
71.5	-138.5	2152.91666666667	13.2481261579624	5.61259234906602	3.07435561213407	-1.80962201116533	-0.761014609391701	-1.45577652101438
71.5	-137.5	1942.54861111111	13.2540256000808	5.64433556028697	3.07052406011024	-1.80108582618099	-0.755769065215416	-1.47901842756840
71.5	-136.5	1747.06944444444	13.2646432536405	5.65087490359356	3.07681061254364	-1.77903445357957	-0.70910336279025	-1.4193406727665
71.5	-135.5	1555.27777777778	13.2537505179022	5.64059045742989	3.09366695435640	-1.78050556579338	-0.734396028356672	-1.41556791408764
71.5	-134.5	1298.54861111111	13.2625036542408	5.61338140336338	3.09993490780781	-1.77740053919184	-0.727788266635871	-1.41296237315738
71.5	-133.5	1024.16666666667	13.2992915107767	5.56081030737147	2.97502450754233	-1.77303566976565	-0.662442759026394	-1.41954441033981
71.5	-132.5	802.069444444444	13.2583485488428	5.62825978014977	3.04936162281779	-1.77602684397316	-0.661037983090808	-1.41092943036016
71.5	-131.5	563.361111111111	13.2514362363748	5.67304348468154	3.09334241991079	-1.63847026480347	-0.665392449293764	-1.38156513067273
71.5	-130.5	253.756944444444	13.3179271774671	5.73711904739642	3.14153856990651	-1.71809305838186	-0.906325963365182	-1.34266952258072
71.5	-129.5	171.486111111111	13.3688861601482	5.83088666976164	3.14330363903358	-1.73086124098806	-0.885778697380417	-1.25448721877891
71.5	-68.5	1322.5	12.8805519347065	5.28870802897701	2.81155804034450	-1.79859261005128	-1.31439970415110	-1.75813031378235
71.5	-67.5	1793.75694444444	12.9306761738429	5.26880370996613	2.76620544067706	-1.80777700086352	-1.31091476252731	-1.94002694056060
71.5	-66.5	2096.39583333333	12.9396471965867	5.24683392767841	2.7771705644455	-1.82582915131629	-1.33156128540257	-2.07856466474924
71.5	-65.5	2237.3125	13.0286676549090	5.38127712364943	2.79426766966339	-1.82445452298437	-1.35425322481868	-1.96368992876073
71.5	-64.5	2241.1875	12.9660765952497	5.17735486655422	2.7612636323749	-1.80566693430648	-1.36988110385325	-2.23663549929612
71.5	-63.5	2227.67361111111	12.9766841039714	5.18204057060197	2.75917686525600	-1.81650470798322	-1.36839665459798	-2.06999224458434
71.5	-62.5	2126.75694444444	12.9565150622138	5.3886348888889	2.77543771406476	-1.80811982491046	-1.36551048778325	-2.01762993351226
71.5	-61.5	1745.54861111111	12.9307308464560	5.42017849128959	2.78217509769235	-1.80063658057262	-1.37308085785739	-2.03788565942267
71.5	-60.5	973.548611111111	12.9119193580356	5.53144164307185	2.82779079692763	-1.76555831523612	-1.56692325503945	-2.37453811282106
71.5	-59.5	431.951388888889	13.0065289328743	5.69177352969216	3.07767847441674	-1.60401917198790	-1.30172038578585	-2.09616720939005
71.5	-58.5	319.923611111111	12.9521481804120	5.76028964760302	3.1976309618259	-1.66049104569626	-1.41721877729888	-2.08548174954215
71.5	-57.5	252.708333333333	12.9827004617383	5.76850107553797	3.20653591326951	-1.70575050305386	-1.26285045410354	-2.11256860752975
71.5	-56.5	222.597222222222	13.0402968994069	5.83600461678293	3.31523196091767	-1.69765850973338	-1.23016736386819	-1.65731074654096
71.5	-21.5	191.520833333333	13.0138655412191	5.78448268896236	3.05196341024585	-1.66454297944225	-0.776870722529308	-1.60972595165304
71.5	-20.5	297.055555555556	13.028913742967	5.75912151823479	3.01578658637517	-1.60297070332970	-0.79803633279488	-1.65264575079909
71.5	-19.5	380.986111111111	13.0117210453194	5.77270752497155	3.00563089714767	-1.57623419813704	-0.699693204652415	-1.61349759891621
71.5	-18.5	1041.66666666667	13.0921634210855	5.7293488524562	2.80261195203292	-1.78052681966720	-0.756681670122559	-1.70698641151260
71.5	-17.5	1608.74305555556	13.0953869219638	5.70055827479478	2.80318127132541	-1.80107684691143	-0.6723458364073	-1.75689818980821
71.5	-16.5	1477.44444444444	13.1352929184259	5.69775728486544	2.78468026855844	-1.85504817722166	-0.611409890199353	-1.78537798713214
71.5	-15.5	1257.47222222222	13.0974384712996	5.74387569920754	2.77238762389488	-1.80907156434479	-0.58434038101422	-1.79090622190517
71.5	-14.5	1066.59722222222	13.0644844443709	5.77161285384236	2.77922660336348	-1.81459028250386	-0.653342138417943	-1.99495897831301
71.5	-13.5	1255.77083333333	13.0054965619653	5.73568620633788	2.76650462451471	-1.81218919323672	-0.75032803468938	-2.06643061968016
71.5	-12.5	1529.50694444444	13.0552110797852	5.68096382908552	2.75058396106817	-1.88867971978848	-0.774337041957757	-2.18325263705463
71.5	-11.5	1708.71527777778	13.0875834137702	5.60109012626569	2.72116048374998	-1.89050033489019	-0.823000513645443	-2.18501882734171
71.5	-10.5	1755.77777777778	13.0908515715767	5.61745212371948	2.70402355520583	-1.88057134372052	-0.642257607419222	-2.26593805781788
71.5	-9.5	1702.47916666667	13.0583116989311	5.63705828791352	2.70449454244809	-1.88100568109187	-0.678811583581114	-2.24940609204895
71.5	-8.5	1728.875	13.0451393377541	5.61791130226731	2.70277311150295	-1.87799501690837	-0.748759277371385	-2.03284974338478
71.5	-7.5	1857.20833333333	13.0346483374242	5.57313541105905	2.69566641377761	-1.86478353611571	-0.813699592984824	-2.43097506618767
71.5	-6.5	1886.64583333333	12.9559424836943	5.44838950297261	2.6961550377945	-1.85360261832266	-0.88587083865723	-2.51988919882931
71.5	-5.5	1862.27083333333	12.9441157772629	5.43751774152464	2.69694967168335	-1.87362456458807	-0.919474147786473	-2.54138177921072
71.5	-4.5	1997.72222222222	12.9648644669962	5.448234095566	2.70018952205790	-1.87861279704459	-0.904635507946653	-2.54921774200620
71.5	-3.5	2023.67361111111	12.976089196745	5.44211662991696	2.66410588698085	-1.86326515994995	-0.906206245447262	-2.57785077206461
71.5	-2.5	2144.21527777778	12.9611109488873	5.44238139804363	2.66483135358526	-1.84591741483299	-0.973436179321504	-2.59084846739675
71.5	-1.5	2263.61805555556	12.9269663101762	5.46133865024148	2.67515630500505	-1.85571736000473	-1.00509213912782	-2.61663399501374
71.5	-0.5	2503.40972222222	12.9087512536679	5.48199630641527	2.68132280825477	-1.83589438849152	-1.06019838457931	-2.51804393474079
71.5	0.5	2686.91666666667	12.9095468850746	5.47281588606451	2.68642289435673	-1.87713798583742	-1.04329386652676	-2.63681239733635
71.5	1.5	2739.125	12.9251481503311	5.55986560090199	2.68607256746436	-1.75306314551729	-1.06208767423900	-2.42255793393203
71.5	2.5	2936.34722222222	12.9261400925835	5.71185308085907	2.60573253611681	-1.80228148632939	-1.03821068728881	-2.63037207377853
71.5	3.5	3005.06944444444	12.9203005251067	5.66585828187041	2.59440009983352	-1.83841152753676	-1.00452125125794	-2.64380285604574
71.5	4.5	3046.29861111111	12.9036786457579	5.69018913206347	2.5938334149601	-1.79364263222944	-0.887469942163773	-2.52425686506061
71.5	5.5	3018.15972222222	12.8840519903512	5.71004389308049	2.57753358222078	-1.69835622571759	-0.851029847074865	-2.14290178900780
71.5	6.5	2961.47222222222	12.8805765022687	5.70628529371774	2.55997596406297	-1.62313190572653	-0.754065612441145	-2.20819474006074
71.5	7.5	2846.86805555556	12.8605303261915	5.72721217330929	2.58455229704267	-1.43653042069911	-0.624372808210534	-2.08584639717539
71.5	8.5	2715.22916666667	12.7489777552592	5.73679842483745	2.58774541500033	-1.17842066268828	-0.634756182132957	-2.07051976046617
71.5	9.5	2562.92361111111	12.7587474515843	5.70460308497992	2.63290410683924	-1.15620149825071	-0.614261047932762	-2.05189007060356
71.5	10.5	2425.54861111111	12.7544645442763	5.71434152250512	2.6708209794897	-1.11571796708000	-0.547249785523647	-2.03702487507341
71.5	11.5	2294.09722222222	12.7770190236766	5.74657623909868	2.65869652206066	-1.10134140128737	-0.541830705746093	-1.97282095465487
71.5	12.5	2111.25694444444	12.8002020316161	5.77871047062732	2.76421143867945	-1.09093334241529	-0.559351382543515	-1.94634067815185
71.5	13.5	1886.24305555556	12.8131573643601	5.76596265487703	2.7859603034267	-0.96918017290378	-0.555783616198211	-1.86248312583296
71.5	14.5	1602.94444444444	12.7878123423195	5.79678285204455	2.84614365915819	-0.956643967822299	-0.53180061642617	-1.85919617436481
71.5	15.5	1234.33333333333	12.8642333817966	5.88653033448427	2.87714277742570	-0.914134946140678	-0.560533728093228	-1.74977132725419
71.5	16.5	666.972222222222	12.8460149145059	5.94408856842278	2.95950687934132	-0.823521883144416	-0.863753169495342	-1.71558171274455
71.5	17.5	288.604166666667	12.8452522188374	5.95769455111407	2.96564898307568	-0.856713302446859	-1.08420666642971	-1.67688398073233
71.5	18.5	249.381944444444	12.7380222666841	5.91237732197191	2.99334717129261	-1.13656582827745	-1.10509255124370	-1.68279855494052
71.5	19.5	236.965277777778	12.7286004090484	5.90686302800312	2.98737045641969	-1.40280046036238	-1.26975553648416	-1.67738265356521
71.5	20.5	263.368055555556	12.7890482811864	5.92077114851717	2.97395002622174	-1.45006072881814	-1.00583435128781	-1.69055090602004
71.5	22.5	349.222222222222	12.6946052479665	5.95361599316784	2.97943030801040	-1.32943713126146	-0.823387533513087	-1.71147658304721
71.5	29.5	317.541666666667	12.7854277809100	5.92299027752506	2.97479446258609	-1.57557871262105	-1.23578108532446	-1.71500549565418
71.5	32.5	273.263888888889	12.7528137267407	5.88301553605277	2.98675104096871	-1.51959244667981	-0.998928603846634	-1.72500697785488
71.5	33.5	254.104166666667	12.7938740432102	5.87955166765808	2.98370570474033	-1.63137504624908	-1.06518349140895	-1.75332416973253
71.5	34.5	219.826388888889	12.8041062300340	5.89350603887322	2.98610361145755	-1.60446841929297	-0.946604294775163	-1.70610568339174
71.5	35.5	218.694444444444	12.8237815034888	5.88322737606632	3.00634333104077	-1.60488918662884	-0.928114356962518	-1.70034184181524
71.5	36.5	240.868055555556	12.8144412735318	5.86968293979985	3.01177191738529	-1.59819511530402	-0.942964166958975	-1.72403110388132
71.5	37.5	273.041666666667	12.8180382198086	5.84308110122303	2.99102667785166	-1.60065554877489	-0.926328321950053	-1.73113154394217
71.5	38.5	320.479166666667	12.7709927977235	5.86554954287813	2.99556046371863	-1.56560499101330	-0.932720655308282	-1.72766344418046
71.5	39.5	327.298611111111	12.7567833093271	5.85731145862943	2.99835036678166	-1.51726118499054	-0.907623205493106	-1.72541538976331
71.5	40.5	307.097222222222	12.8028827581159	5.86995400658562	3.02132914613738	-1.61064330661051	-0.921464662313804	-1.71865365330543
71.5	41.5	241.375	12.8087009633001	5.87266120098732	3.00007899935932	-1.64058883289520	-0.920571377854442	-1.74568487705118
71.5	42.5	215.430555555556	12.8216773243542	5.8723088798376	3.0104248338162	-1.65832650412483	-0.838570609949355	-1.69409858965997
71.5	43.5	215.326388888889	12.7484446629752	5.86656925204108	3.01185802400546	-1.64231048294105	-0.82325458562717	-1.64880453594539
71.5	44.5	170.590277777778	12.6972559547400	5.86639152582438	3.00712856963277	-1.58350907619308	-0.874409560633843	-1.58216850729704
71.5	45.5	138.430555555556	12.7666061789522	5.86759291749234	3.00593490917953	-1.578962739648	-0.888143807611288	-1.46419582878157
71.5	46.5	125.409722222222	12.7709476730943	5.88424816384956	3.03279770484719	-1.60443326350157	-0.931937091774433	-1.47495847199787
71.5	47.5	111.291666666667	12.7748526680105	5.87073160585364	3.01447701607359	-1.62373857056683	-1.07802537349405	-1.44072173978136
71.5	48.5	118.118055555556	12.8692383734518	5.84120275709669	2.97894471772085	-1.65473037171267	-1.11650234447517	-1.55793704690180
71.5	49.5	114.645833333333	12.9263340502422	5.78245254385523	2.98992348086881	-1.67114691890939	-1.26174981165080	-1.95060017873823
71.5	50.5	108.458333333333	12.9490006721844	5.79586453490925	2.98786255887293	-1.70073436277823	-1.27026936472930	-1.87179596796011
71.5	60.5	86.7847222222222	13.2161531796514	5.81479021372605	3.09399741705805	-1.63890121085759	-0.932395274941327	-1.21096457240621
71.5	61.5	87.4513888888889	13.2046341829994	5.78804099102526	3.11133905877247	-1.64010587650782	-0.976592597765624	-1.20060875159367
71.5	62.5	105.583333333333	13.2185389332648	5.78331242531317	3.10487885014964	-1.63476859871902	-1.00490086973233	-1.25778926915388
71.5	63.5	117.201388888889	13.1925492698214	5.79268772993474	3.11482970962507	-1.62497064023039	-0.924103045255393	-1.27643987535638
71.5	64.5	88.4444444444444	13.4257404582284	5.78510557154832	3.18028132726452	-1.59990370196035	-0.927978401457402	-1.20582304110347
71.5	65.5	101.402777777778	13.4141461298837	5.78172299593386	3.16211034682910	-1.61340990241969	-0.888752149589908	-1.31814850479328
71.5	66.5	39.6527777777778	13.4289140260442	5.82296859764678	3.10955973767254	-1.63974696728312	-0.89848226814988	-1.1998997733281
71.5	131.5	13.2708333333333	13.4002761495534	5.84752731848395	3.09949784124432	-1.65482725024375	-0.895278885581893	-0.953551367169549
71.5	152.5	11.8333333333333	13.3502527133059	5.88543876289826	3.01930916976901	-1.70710336211146	-0.816417828756147	-0.924940849443478
71.5	155.5	9.63888888888889	13.3210217931639	5.88440015162428	3.04925187797876	-1.69141415676062	-0.85094666838545	-1.00573121707644
71.5	157.5	8.40972222222222	13.2818480293139	5.89916424191063	3.05350019723888	-1.69199440283082	-0.809905804699757	-0.996352969166778
71.5	158.5	12.4861111111111	13.2954233791132	5.89948671836162	3.06649858636221	-1.69157277276253	-0.83598442931664	-0.997685243387174
71.5	159.5	14.7777777777778	13.2982996464598	5.90208914504888	3.07681958238222	-1.68712744269754	-0.849069051186513	-1.07683183021010
71.5	160.5	15.5208333333333	13.2892413840692	5.91203395503498	3.09889260425871	-1.66691016969799	-0.827071971861991	-1.11783383396414
71.5	161.5	18.1736111111111	13.3224855518968	5.89591291668907	3.10050985136596	-1.67604256324888	-0.845164888703902	-1.10718284298801
71.5	162.5	19.6041666666667	13.3103557035637	5.82019677235276	3.05180329847178	-1.63110448238856	-0.848129475907109	-1.08445695832110
71.5	163.5	20.8333333333333	13.3129587934215	5.81737444014194	3.00284273429279	-1.60110401854787	-0.852724200697936	-1.07532821303348
71.5	164.5	22.4305555555556	13.230413643297	5.8095628918322	2.95268242261099	-1.61440318221979	-0.876418478858836	-1.11750063781554
71.5	165.5	22.8263888888889	13.2793895260581	5.77927990179305	2.91255741188348	-1.60257838108485	-0.864957433185161	-1.14424110565567
71.5	166.5	22.5972222222222	13.1920668702642	5.71534433487885	2.88918326562267	-1.60922298046764	-0.767426834167659	-1.18163394847153
71.5	167.5	25.0069444444444	13.1708864559677	5.73427458344178	2.96193973414473	-1.60628010610001	-0.792297906166133	-1.22309349228039
71.5	168.5	30.8055555555556	13.1391804080031	5.71362191520862	2.94530802358202	-1.57972104779709	-0.828285730298028	-1.20288501158351
71.5	169.5	36.7222222222222	13.1584132013143	5.70346771881552	2.89076325867434	-1.58373143315137	-0.994885984693563	-1.19888143263574
71.5	170.5	37.9652777777778	13.1430046960563	5.71388412823475	2.94326077674414	-1.55125099331830	-0.969769517577947	-1.21100243102564
71.5	171.5	39.7847222222222	13.1646035760266	5.71810581091839	2.93955922577176	-1.57056786734763	-0.892264460401044	-1.28245511535418
71.5	172.5	41.2291666666667	13.0906508491825	5.71652868909084	2.94682892669671	-1.54638398459152	-0.889900900452663	-1.28427144356370
71.5	173.5	41.0069444444444	13.097874127664	5.70134242720503	2.89103351223286	-1.55376745070632	-0.985312193155835	-1.36031260787867
71.5	174.5	38.3125	13.0504854785408	5.73472128812835	2.90577757570947	-1.57107444636969	-1.09094721691481	-1.38191715891724
71.5	175.5	35.8472222222222	13.1800422217603	5.76385689638223	2.89014633423033	-1.57806881567543	-1.06012371649444	-1.38315598441181
71.5	176.5	32.6041666666667	13.1586230835932	5.76572001246699	2.86488776940117	-1.59210689996054	-1.08312803674443	-1.38571125364769
71.5	177.5	32.4513888888889	13.1826000890557	5.77038668907258	2.90059706175216	-1.59270253617059	-1.05867901418075	-1.38857202109351
71.5	178.5	19.875	13.2594481900941	5.79889608876488	2.94383606170101	-1.57340565191650	-1.08304156131887	-1.38654227959792
70.5	-177.5	44.1180555555556	13.1596668135031	5.77196065602139	2.92659671350472	-1.58630239371878	-1.12847408718629	-1.37868761069478
70.5	-176.5	54.0069444444444	13.0622676219258	5.74744318459706	2.89384362807662	-1.58830776752539	-0.998236165827376	-1.40111140213781
70.5	-175.5	60.6736111111111	13.0688173804928	5.72072518194719	2.95506654893847	-1.60305149593436	-0.943253269082506	-1.40201335890541
70.5	-174.5	55.9583333333333	13.0546765046671	5.71787643861804	2.97412146837790	-1.61147215725648	-0.953831881709492	-1.39510662654368
70.5	-173.5	44.0208333333333	13.0606626009845	5.71863560543956	2.94789707629159	-1.6278470107255	-0.998283653524335	-1.37494001329356
70.5	-172.5	37.3194444444444	13.0709887309907	5.73788732888047	2.91923454498935	-1.63154142722139	-1.03112467146851	-1.37251954365688
70.5	-171.5	34.7013888888889	13.0625434017405	5.80480903323694	2.93854769772545	-1.61548353457047	-0.958982751945626	-1.38657931914895
70.5	-170.5	33.1458333333333	13.0344778932241	5.80296656644643	2.84961598072335	-1.60482586499697	-0.741121878029597	-1.37597472918224
70.5	-169.5	34.4930555555556	13.0487571852411	5.82479347689213	2.87440206167455	-1.58922493528835	-0.64640705703396	-1.27187941065429
70.5	-168.5	41.4027777777778	13.0653318233601	5.81883078820288	2.88907092381978	-1.59919784103020	-0.609332593096918	-1.24132540949695
70.5	-167.5	48.1875	13.0267305158065	5.74608631397678	3.00467952223731	-1.66510743114257	-0.735053125205941	-1.33072836582179
70.5	-166.5	44.5069444444444	13.0283954761244	5.74970852067632	3.01987443784986	-1.65317393241624	-0.808422649138424	-1.32336973961438
70.5	-165.5	40.3888888888889	13.0542877844467	5.78210547848267	2.89564418516092	-1.64603357188146	-0.577308600481688	-1.32588818162766
70.5	-164.5	41.0555555555556	13.0513130939259	5.78233745034111	2.88032371043099	-1.63694195057082	-0.515729231788423	-1.31699113390608
70.5	-163.5	37.4166666666667	13.251680280247	5.82373114010657	2.83653181019954	-1.61953018444232	-0.730406220128998	-1.22222334277604
70.5	-143.5	330.548611111111	13.3407001289966	5.85746850053776	3.18530260460674	-1.65449379390265	-0.87408324978879	-1.31119492858432
70.5	-142.5	478.361111111111	13.3334738154087	5.79939557219391	3.12305033864687	-1.66450676503618	-0.75570584825941	-1.33794559343223
70.5	-140.5	881.215277777778	13.3347816131504	5.80297670585992	3.13157854045012	-1.85184672820963	-0.727860741151144	-1.36918299360690
70.5	-137.5	784.909722222222	13.2948338461658	5.80674825712661	3.18924239786625	-1.78316138030777	-0.73327234278385	-1.36977039597085
70.5	-136.5	477.215277777778	13.2923489715081	5.83435239332426	3.19846333780495	-1.63538074079102	-0.737586641914281	-1.31783550026822
70.5	-135.5	196.798611111111	13.3506874385727	5.89548352964696	3.14090623410164	-1.72739103836678	-0.873838387374545	-1.31137497462129
70.5	-134.5	77.3819444444444	13.3556777525812	5.95001992527004	3.11544528251312	-1.69388747188856	-0.855211322346381	-0.970261740082697
70.5	-133.5	56.7638888888889	13.3365773271898	6.00373111336979	3.13740960199017	-1.66098984192507	-0.936107031672943	-0.963632805552309
70.5	-132.5	42.3194444444444	13.3613859871369	5.94686541719452	3.07170802498786	-1.68096819995309	-0.854453474159295	-0.951231967177716
70.5	-131.5	36.2430555555556	13.3348215899937	5.94653050617857	3.10378500799657	-1.66880606481857	-0.838182646246365	-0.953926297364018
70.5	-130.5	22.7430555555556	13.3208998640303	5.86109454484773	3.08956652415247	-1.68204884399542	-0.815324614287751	-0.949214503190322
70.5	-129.5	17.3888888888889	13.3175236429602	5.86256472665172	3.10539666260014	-1.69454043693798	-0.786378851429403	-0.94035883483969
70.5	-126.5	264.125	13.2631238735569	5.81280425201365	3.11386488307861	-1.7378551282671	-1.12771810910991	-1.33517988605148
70.5	-125.5	226.305555555556	13.3549629537489	5.84862954703949	3.12735635103029	-1.76202751432297	-1.06919845959803	-1.31019057795471
70.5	-124.5	237.020833333333	13.2619765246528	5.80675664772361	3.1357404350724	-1.73015449318978	-0.958764685446678	-1.31814637195967
70.5	-123.5	378.708333333333	13.1188298821052	5.74143002983116	3.13509292748909	-1.70727472413597	-0.839146654297375	-1.35565335059590
70.5	-122.5	432.493055555556	13.2265556772849	5.67203848139203	3.26954218225609	-1.67661004366671	-0.813130074625957	-1.38803880529485
70.5	-121.5	402.104166666667	13.1142985396576	5.70591479257916	3.18339142714571	-1.7051636448962	-0.996290650016543	-1.39035883484178
70.5	-120.5	338.013888888889	13.1134750024834	5.55469654515113	3.05912163993330	-1.72302712989290	-1.08214514388035	-1.51565133093446
70.5	-119.5	324.4375	13.1171913572225	5.59841684368079	3.05532797540348	-1.75042385868730	-1.13119902202502	-1.49549976020737
70.5	-67.5	176.486111111111	13.0980390916788	5.56137689763674	2.99236929082536	-1.71850664404703	-0.9823298982488	-1.53718670554996
70.5	-66.5	660.506944444444	13.0597784230934	5.36374922356764	2.92929190631989	-1.76176237476818	-0.857913567787779	-1.84980759086783
70.5	-65.5	1399.76388888889	12.8864515091959	5.26070349970167	2.7680999763103	-1.82430680734528	-1.30231455226752	-2.16290997418182
70.5	-64.5	2012.375	12.9391196856823	5.1673147959466	2.74960193455588	-1.83373994220803	-1.36075087796555	-2.75624037562043
70.5	-63.5	2101.875	12.9650158977966	5.29011006604397	2.74024987646224	-1.82793487094298	-1.36633811086519	-2.29092111514928
70.5	-62.5	2000.94444444444	12.9536469766198	5.31723227213887	2.75617366011813	-1.81883038341581	-1.36888584189796	-2.13543932221874
70.5	-61.5	1489.26388888889	12.9566415140825	5.45751303541713	2.80697858137356	-1.80686627226968	-1.38416769523463	-2.11450740901886
70.5	-60.5	748.305555555556	12.8876974549169	5.5306533748228	2.87934467207916	-1.70541300619771	-1.43993175035495	-2.32008471747122
70.5	-59.5	488.055555555556	12.9617928798984	5.6528102315665	2.99025672928941	-1.62214038514675	-1.48361410787725	-2.07905821242907
70.5	-58.5	416.638888888889	12.9416240361092	5.68059743396816	3.11736883599812	-1.61683102224349	-1.35220479822849	-2.16043284997834
70.5	-57.5	395.347222222222	12.9480769413724	5.77688843953704	3.16703427304825	-1.66118192385575	-1.28807163838821	-2.23093455662433
70.5	-56.5	333.965277777778	12.9484483118970	5.80494827500202	3.29031739681875	-1.65799756698811	-1.18906088771176	-2.10820074735755
70.5	-55.5	264.25	13.1899878851876	5.77947199911058	3.3665041245269	-1.63506322207142	-1.35277566286898	-1.63786975426084
70.5	-20.5	306.465277777778	13.0332904753459	5.76122074700297	3.04912525048031	-1.62363133424017	-0.831254321619368	-1.70207226745431
70.5	-19.5	487.097222222222	13.0400453617741	5.76608897067802	2.98756776573434	-1.56761341296152	-0.786701859024734	-1.69300081570455
70.5	-18.5	1406.69444444444	13.0881402678527	5.69830415061163	2.82925643769386	-1.81332593385837	-0.72618373545988	-1.75741778446912
70.5	-17.5	1586.83333333333	13.1293067201406	5.67597614317702	2.82374146862123	-1.83338888988519	-0.686012226121985	-1.86091562070114
70.5	-16.5	1251.10416666667	13.0657542152544	5.64351956484508	2.81612520723693	-1.87947203403403	-0.852601933520262	-2.35133318965912
70.5	-15.5	1207.77083333333	13.0797591439828	5.70470152635055	2.83383932337125	-1.84595315413262	-0.76693194481603	-2.27595824476981
70.5	-14.5	1290.65972222222	13.0672121495725	5.7028190073227	2.80803054438233	-1.82636560247106	-0.848833911849115	-2.24325438593366
70.5	-13.5	1339.4375	13.0137713933213	5.70071754114998	2.78760650142843	-1.82092152086334	-0.801669213873829	-2.25671362946963
70.5	-12.5	1206.22916666667	13.0295206234985	5.71847982977593	2.74162519013373	-1.86863301124963	-0.676841838429614	-1.87264116827663
70.5	-11.5	1339.91666666667	13.0255100951186	5.7139011420819	2.74549372602842	-1.86542609727728	-0.658646729852961	-1.87849799398142
70.5	-10.5	1305.3125	12.9821096324632	5.69684919115819	2.76002531171228	-1.85097263828723	-0.61374901318497	-1.78504522957694
70.5	-9.5	1004.11111111111	12.9221788315899	5.72900262942957	2.78331077268072	-1.84945246417903	-0.657299587021759	-1.76003702325674
70.5	-8.5	434.597222222222	12.9865165862445	5.82601671372287	2.89912292739900	-1.59966960880024	-0.711943462958038	-1.69691128220911
70.5	-7.5	1133.27083333333	12.9570564236654	5.72612352356963	2.76354092772843	-1.83143953284770	-0.784421714801324	-2.13204571928190
70.5	-6.5	2074.44444444444	12.9372594759768	5.62966109423283	2.6973099062637	-1.84518669506626	-0.925064331423815	-2.42953691061227
70.5	-5.5	2388.70138888889	12.9478089910980	5.45898870243361	2.66025689287046	-1.86128245083053	-0.970091054921996	-2.45235115733391
70.5	-4.5	2438.52777777778	12.9471116621826	5.45177775784015	2.58621113898192	-1.88514884349730	-0.991756382753325	-2.63230274767125
70.5	-3.5	2596.54861111111	12.9425181968791	5.46605803630305	2.56784354981232	-1.88232065877102	-1.0241287564808	-2.64514682900407
70.5	-2.5	2834.99305555556	12.9354480116047	5.535229783758	2.60529841401289	-1.86998159646550	-1.02546930527952	-2.48258747933061
70.5	-1.5	3015.11805555556	12.9185952289081	5.63504609082908	2.54662842469802	-1.87148582845813	-1.06069375848769	-2.66647681647495
70.5	-0.5	3148.70833333333	12.9256031798380	5.64715955828894	2.59985546658	-1.86755855159939	-1.04758429030835	-2.44410344907161
70.5	0.5	3084.72916666667	12.9295075513253	5.6826993086663	2.62420669314901	-1.88576220971659	-0.874348550154211	-2.44988925312096
70.5	1.5	3187.73611111111	12.9002734311575	5.68474207018063	2.63005663511961	-1.76866701905002	-0.897063320975067	-2.14083568622999
70.5	2.5	3203.38888888889	12.9176582026919	5.67275076180116	2.58528141662202	-1.79567828636246	-0.873081620519338	-2.54713661002198
70.5	3.5	3202.34722222222	12.8873828572237	5.68682455026404	2.62587339083061	-1.70680362489325	-0.827254430982306	-2.53028930201599
70.5	4.5	3191.46527777778	12.8684873547924	5.68962989011362	2.62762721155444	-1.6825658552092	-0.769721033254583	-2.20453257203298
70.5	5.5	3173.11111111111	12.8736293482126	5.69226877747571	2.61812610425591	-1.44574946870971	-0.66277475126319	-2.0804534440719
70.5	6.5	3109.56944444444	12.7689044968361	5.69925548173777	2.66601117745285	-1.16009125403559	-0.608908812207359	-2.05612792411675
70.5	7.5	3004.22222222222	12.7956050147832	5.68578313285391	2.65550296666167	-1.12418504941467	-0.568111671813683	-2.04026861888886
70.5	8.5	2874.84722222222	12.8216146049268	5.68289923806485	2.67899526136251	-1.09467828241331	-0.564148485499092	-1.98606459092082
70.5	9.5	2782.88888888889	12.7835303169615	5.68092512732306	2.65453972656876	-1.05510264706462	-0.566641751792443	-1.92051873101433
70.5	10.5	2750.77083333333	12.8462029815604	5.72312301132273	2.63576619062614	-1.04269828057260	-0.556026990835877	-1.83902374544351
70.5	11.5	2693.72916666667	12.8662324410237	5.68851636867872	2.64911157518440	-0.922650860819826	-0.534997305762249	-1.79402691682014
70.5	12.5	2605.95138888889	12.8576940214603	5.71382023925845	2.72499052373651	-1.04134281866644	-0.576257742758486	-1.88618571205955
70.5	13.5	2501.30555555556	12.8498709508079	5.69624247956673	2.7715493629287	-1.05340388410095	-0.583617652956907	-1.92275593637524
70.5	14.5	2357.15972222222	12.8330478731033	5.69392514317155	2.79936902057318	-1.07654263070954	-0.59358129604936	-1.95369053128647
70.5	15.5	2143.72222222222	12.8179298212242	5.73645973134683	2.84017184844565	-1.06123285130779	-0.534870289699494	-1.93516279650633
70.5	16.5	1469.45138888889	12.8204621691843	5.80343281834428	2.89889913243122	-1.06837992009692	-0.517556593407829	-1.89187534476268
70.5	17.5	284.833333333333	12.8694419242622	5.8648822329032	2.98561189610736	-0.878218748420579	-1.05580058036230	-1.65711902953221
70.5	18.5	173.784722222222	12.7058776622932	5.89111849010227	3.03165835745857	-1.08611286327493	-1.13190572129048	-1.64511179284546
70.5	19.5	117.631944444444	12.7789953338804	5.9034468835593	3.04178194606767	-1.50303159585959	-1.53851740938287	-1.53512136317995
70.5	36.5	173.694444444444	12.800309847319	5.8867068537749	3.00209627238914	-1.59043815983374	-1.06105624031498	-1.64772603148770
70.5	37.5	182.868055555556	12.8421819800916	5.89356336416987	3.01057005261902	-1.59817802696664	-1.06807744806617	-1.67471684433978
70.5	39.5	213.736111111111	12.7601518569210	5.87570498128854	2.98549678967683	-1.58449090792137	-1.00121645086096	-1.67117203407921
70.5	40.5	159.166666666667	12.8328908294669	5.87627977919747	2.95881949689149	-1.59937441830768	-0.944197370606008	-1.45339162489339
70.5	41.5	99.5763888888889	12.9188389473723	5.85474933895934	2.91878285467344	-1.59080421795623	-1.09315184592280	-1.41773088010414
70.5	42.5	77.4861111111111	12.8496352421956	5.84941296180206	2.90077838997960	-1.56701447635151	-1.11278023496881	-1.35943209726486
70.5	43.5	91.1111111111111	12.8965414453027	5.85506438699163	2.92889677521938	-1.56440369322853	-1.13454483561538	-1.38178576914907
70.5	44.5	102.541666666667	12.8608496329651	5.86035492271664	2.96483364256483	-1.56640037899061	-1.10167122563020	-1.42651925782787
70.5	45.5	108.104166666667	12.8355166547201	5.86433286864987	3.00352716186432	-1.58993734166422	-0.995947723762783	-1.43595304018821
70.5	46.5	114.333333333333	12.8425902807372	5.84890677666662	2.99941358618415	-1.59380327580934	-1.00630438808413	-1.44591014819808
70.5	47.5	117.548611111111	12.8606758915823	5.88064604672775	3.00122761258627	-1.57333688909032	-1.01985730206128	-1.39783002481855
70.5	48.5	97.0208333333333	12.9176633866873	5.84722053388011	3.00725024819581	-1.58656471406910	-1.11712326186044	-1.35872101183816
70.5	49.5	80.7222222222222	12.9845413609404	5.8367900533548	3.00403978209467	-1.63749212491235	-1.11699729030122	-1.38856895664109
70.5	50.5	95.4027777777778	13.0156762855301	5.82051309594568	3.00643169603200	-1.68707018420552	-1.14813349449557	-1.46481362965449
70.5	51.5	110.444444444444	13.0220695606462	5.83004713028636	3.01188844964457	-1.67521218785302	-1.16396285556687	-1.522258671077
70.5	52.5	120.486111111111	13.1329814393922	5.81547991032434	3.15384314360776	-1.66977845805037	-1.18590123518282	-1.60134793273449
70.5	60.5	138.229166666667	13.4633842510535	5.72007891362106	3.09149701837262	-1.62637405526191	-0.92003785164134	-1.29978180329259
70.5	61.5	154.291666666667	13.3380110924422	5.72440547383083	3.13006298530446	-1.62065741268100	-0.88350030851549	-1.29582928852814
70.5	64.5	76.9513888888889	13.3654526782189	5.78224032896165	3.10964977068022	-1.62801815104111	-0.933222794680882	-1.27942177936707
[truncated: 35,145 more rows]
